# Supplementary material for: Size-based expectation maximization for characterizing nucleosome positions and subtypes
Source: HighWire-hosted journal article supplement (doi:10.1101/gr.279138.124), 2024-06-17
Supplement: Supplemental_Table_S1.xlsx [file Supplemental_Table_S1.xlsx]

## Sheet: Accessible short fragment
Accessible short fragment nucleosome vs nonaccessible canonical nucleosome
ID	Antigen	Cell	Num of Peaks	Overlaps with Dataset	Overlaps with Control	Log P-val	Log Q-val	Fold Enrichment
SRX19028396	Epitope tags	ES cells	686	375/4398	14/93663	-324	-324	570.448
SRX12702095	Smad2	ES cells	2033	883/4398	33/93663	-324	-324	569.849
SRX12702093	Smad2	ES cells	656	340/4398	13/93663	-324	-324	556.991
SRX19028398	Epitope tags	ES cells	1891	973/4398	39/93663	-324	-324	531.326
SRX19028397	Epitope tags	ES cells	800	511/4398	22/93663	-324	-324	494.665
SRX19028400	Epitope tags	ES cells	978	555/4398	24/93663	-324	-324	492.487
SRX6078355	Ep300	ES cells	4299	772/4398	35/93663	-324	-324	469.745
SRX11221898	Med4	ES cells	2084	696/4398	33/93663	-324	-324	449.167
SRX6078356	Ep300	ES cells	4613	713/4398	35/93663	-324	-324	433.845
SRX19028395	Epitope tags	ES cells	436	260/4398	13/93663	-324	-324	425.935
SRX19028399	Epitope tags	ES cells	409	258/4398	13/93663	-324	-324	422.658
SRX14663252	Pml	ES cells	1767	781/4398	41/93663	-324	-324	405.677
SRX12702096	Smad2	ES cells	2290	961/4398	51/93663	-324	-324	401.297
SRX426373	Cbx8	ES cells	740	377/4398	21/93663	-324	-324	382.327
SRX3341234	Bap1	ES cells	1369	750/4398	42/93663	-324	-324	380.299
SRX6078352	Crebbp	ES cells	2615	388/4398	23/93663	-324	-324	359.267
SRX14663251	Pml	ES cells	2259	888/4398	53/93663	-324	-324	356.821
SRX5850132	Nrf1	ES cells	2561	1077/4398	66/93663	-324	-324	347.524
SRX4980252	Hoxb1	ES cells	877	352/4398	22/93663	-324	-324	340.748
SRX11221917	Med4	ES cells	1957	666/4398	42/93663	-324	-324	337.705
SRX366411	Thap11	ES cells	1149	422/4398	27/93663	-324	-324	332.86
SRX111885	Rbbp5	ES cells	4786	1051/4398	70/93663	-324	-324	319.755
SRX9088764	Pbx1	Embryoid Bodies	1034	299/4398	20/93663	-324	-324	318.386
SRX426374	Cbx8	ES cells	1131	506/4398	35/93663	-324	-324	307.89
SRX5850131	Nrf1	ES cells	3187	1457/4398	102/93663	-324	-324	304.209
SRX3341233	Bap1	ES cells	3077	1349/4398	95/93663	-324	-324	302.414
SRX14059484	Arid2	ES cells	2469	674/4398	48/93663	-324	-324	299.042
SRX5850138	Nrf1	ES cells	3259	1252/4398	90/93663	-324	-324	296.261
SRX11221894	Med1	ES cells	2923	1070/4398	77/93663	-324	-324	295.942
SRX6078353	Crebbp	ES cells	3104	389/4398	28/93663	-324	-324	295.872
SRX12197085	Nrf1	mESC derived neural cells	1705	303/4398	22/93663	-324	-324	293.314
SRX19028473	Cpsf3l	ES cells	3945	1138/4398	83/93663	-324	-324	291.996
SRX1080404	Smad2	Embryoid Bodies	4193	1459/4398	109/93663	-324	-324	285.064
SRX111876	Rbbp5	ES cells	6098	1238/4398	93/93663	-324	-324	283.498
SRX6657509	Ss18	ES cells	1993	529/4398	40/93663	-324	-324	281.649
SRX11717333	Nelfa	ES cells	2012	601/4398	46/93663	-324	-324	278.246
SRX5850136	Nrf1	ES cells	3311	1405/4398	108/93663	-324	-324	277.055
SRX5001426	Yy1	ES cells	1068	269/4398	21/93663	-324	-324	272.801
SRX14059485	Arid2	ES cells	4349	1240/4398	97/93663	-324	-324	272.247
SRX5785868	Nelfe	ES cells	1478	460/4398	36/93663	-324	-324	272.125
SRX5001427	Yy1	ES cells	1095	279/4398	22/93663	-324	-324	270.081
SRX1688202	Smarcc1	ES cells	1622	456/4398	36/93663	-324	-324	269.759
SRX5855848	Pou5f1	ES cells	3320	1110/4398	88/93663	-324	-324	268.629
SRX7711379	Ythdc1	ES cells	1472	301/4398	24/93663	-324	-324	267.096
SRX8701250	Ythdc1	ES cells	1472	301/4398	24/93663	-324	-324	267.096
SRX9641194	Tcf4	EpiLC	1446	326/4398	26/93663	-324	-324	267.028
SRX13999589	Nelfe	ES cells	5659	1341/4398	107/93663	-324	-324	266.906
SRX5938348	Cxxc5	ES cells	1029	399/4398	32/93663	-324	-324	265.544
SRX2415036	Mettl3	ES cells	816	323/4398	26/93663	-324	-324	264.571
SRX5850134	Nrf1	ES cells	3599	1228/4398	99/93663	-324	-324	264.165
SRX1089843	Gtf2b	Embryoid Bodies	1925	681/4398	55/93663	-324	-324	263.692
SRX5850128	Nrf1	ES cells	4017	1332/4398	108/93663	-324	-324	262.66
SRX647909	Epitope tags	ES cells	4702	1370/4398	112/93663	-324	-324	260.505
SRX9641193	Tcf4	EpiLC	1155	280/4398	23/93663	-324	-324	259.264
SRX3030273	Zbtb2	mESC derived neural cells	1123	316/4398	26/93663	-324	-324	258.837
SRX9641173	Tcf4	ES cells	1286	310/4398	26/93663	-324	-324	253.922
SRX825831	Runx1	mESC derived myeloid progenitors	5804	2087/4398	176/93663	-324	-324	252.536
SRX9424456	Ruvbl2	ES cells	1784	282/4398	24/93663	-324	-324	250.237
SRX5850127	Nrf1	ES cells	4159	1588/4398	136/93663	-324	-324	248.671
SRX19838669	Setd1a	ES cells	5724	1959/4398	168/93663	-324	-324	248.335
SRX14663253	Pml	ES cells	6470	1567/4398	135/93663	-324	-324	247.2
SRX385945	Usp16	ES cells	2140	615/4398	53/93663	-324	-324	247.122
SRX1080407	Smad2	Embryoid Bodies	3681	1169/4398	102/93663	-324	-324	244.077
SRX14059503	Arid2	ES cells	3106	825/4398	72/93663	-324	-324	244.025
SRX11221915	Med4	ES cells	922	297/4398	26/93663	-324	-324	243.274
SRX319557	Nanog	ES cells	3455	865/4398	76/93663	-324	-324	242.39
SRX8722025	Ythdc1	ES cells	1284	364/4398	32/93663	-324	-324	242.25
SRX10111436	Ino80	ES cells	3166	418/4398	37/93663	-324	-324	240.595
SRX9641206	Tcf4	EpiLC	1692	383/4398	34/93663	-324	-324	239.901
SRX5850135	Nrf1	ES cells	4054	1462/4398	130/93663	-324	-324	239.506
SRX5173621	Epitope tags	PGCLC	1675	369/4398	33/93663	-324	-324	238.136
SRX5938347	Cxxc5	ES cells	1679	591/4398	53/93663	-324	-324	237.479
SRX19028482	Supt5	ES cells	3913	1156/4398	104/93663	-324	-324	236.721
SRX825833	Runx1	mESC derived myeloid progenitors	5305	1673/4398	151/93663	-324	-324	235.956
SRX385376	GFP	ES cells	2860	896/4398	81/93663	-324	-324	235.579
SRX047140	Kdm1a	ES cells	2237	673/4398	61/93663	-324	-324	234.962
SRX5850130	Nrf1	ES cells	4411	1401/4398	128/93663	-324	-324	233.099
SRX1602658	Kmt2b	ES cells	2480	569/4398	52/93663	-324	-324	233.035
SRX2486174	Epitope tags	ES cells	2396	688/4398	63/93663	-324	-324	232.574
SRX9424488	GFP	ES cells	4714	921/4398	85/93663	-324	-324	230.756
SRX19028481	Supt5	ES cells	5890	1527/4398	141/93663	-324	-324	230.639
SRX2897263	E2f1	ES cells	2468	450/4398	42/93663	-324	-324	228.179
SRX668246	Cdk7	ES cells	3682	1087/4398	102/93663	-324	-324	226.956
SRX14663254	Pml	ES cells	6740	1587/4398	149/93663	-324	-324	226.832
SRX14134857	Supt5	ES cells	7180	1767/4398	166/93663	-324	-324	226.695
SRX9424473	Ep400	ES cells	3177	1187/4398	112/93663	-324	-324	225.707
SRX19838665	Kmt2a	ES cells	2430	770/4398	73/93663	-324	-324	224.637
SRX9424472	Ep400	ES cells	2427	948/4398	90/93663	-324	-324	224.326
SRX9424474	Ep400	ES cells	2343	989/4398	94/93663	-324	-324	224.069
SRX4980253	Hoxb1	ES cells	836	291/4398	28/93663	-324	-324	221.334
SRX16844930	GFP	ES cells	4197	1184/4398	115/93663	-324	-324	219.264
SRX11676995	Rpa1	ES cells	3572	1153/4398	112/93663	-324	-324	219.242
SRX19838668	Setd1a	ES cells	6595	2093/4398	204/93663	-324	-324	218.5
SRX5371700	Sp1	ES cells	4946	1608/4398	157/93663	-324	-324	218.122
SRX7670009	Gtf2b	ES cells	5762	1500/4398	147/93663	-324	-324	217.314
SRX7687353	Tet1	ES cells	4123	1102/4398	108/93663	-324	-324	217.305
SRX9424489	GFP	ES cells	6336	1323/4398	130/93663	-324	-324	216.735
SRX9637856	Bap1	ES cells	1382	568/4398	56/93663	-324	-324	216.01
SRX9641205	Tcf4	EpiLC	1286	293/4398	29/93663	-324	-324	215.17
SRX087269	Rxra	F9	1430	313/4398	31/93663	-324	-324	215.028
SRX11676994	Rpa1	ES cells	4895	1443/4398	143/93663	-324	-324	214.903
SRX4167133	Taf2	ES cells	10090	2119/4398	210/93663	-324	-324	214.894
SRX19028418	Cpsf3l	ES cells	6178	1411/4398	140/93663	-324	-324	214.641
SRX5850133	Nrf1	ES cells	3851	1362/4398	136/93663	-324	-324	213.28
SRX7176637	Zscan4c	ES cells	1226	340/4398	34/93663	-324	-324	212.967
SRX11417004	GFP	ES cells	2403	689/4398	69/93663	-324	-324	212.659
SRX319552	E2f4	ES cells	3667	818/4398	82/93663	-324	-324	212.448
SRX1517382	Epop	ES cells	1989	407/4398	41/93663	-324	-324	211.409
SRX523449	Atrx	ES cells	5195	1070/4398	108/93663	-324	-324	210.995
SRX2830662	Setd1a	ES cells	6454	2147/4398	217/93663	-324	-324	210.71
SRX7643902	Smad1	ES cells	1880	391/4398	40/93663	-324	-324	208.175
SRX5883468	Stat3	ES cells	3490	546/4398	56/93663	-324	-324	207.643
SRX8701148	Ythdc1	ES cells	3741	330/4398	34/93663	-324	-324	206.704
SRX16844931	GFP	ES cells	2354	649/4398	67/93663	-324	-324	206.292
SRX13439118	DNA-RNA hybrid	ES cells	4088	890/4398	92/93663	-324	-324	206.023
SRX997160	Brd2	ES cells	8589	801/4398	83/93663	-324	-324	205.526
SRX378973	Sp1	mESC derived haematopoietic progenitor	2970	924/4398	96/93663	-324	-324	204.981
SRX14663255	Pml	ES cells	7916	2165/4398	225/93663	-324	-324	204.922
SRX7670008	Gtf2b	ES cells	5394	1422/4398	148/93663	-324	-324	204.621
SRX523447	Atrx	ES cells	1968	422/4398	44/93663	-324	-324	204.255
SRX11221924	Ercc3	ES cells	9401	1541/4398	161/93663	-324	-324	203.84
SRX9641207	Tcf4	EpiLC	1218	268/4398	28/93663	-324	-324	203.84
SRX4397589	Pou5f1	iPS cells	966	354/4398	37/93663	-324	-324	203.758
SRX8701280	Ythdc1	ES cells	4948	458/4398	48/93663	-324	-324	203.206
SRX19028474	Cpsf3l	ES cells	7069	1856/4398	195/93663	-324	-324	202.701
SRX5173625	Epitope tags	ES cells	6775	1590/4398	168/93663	-324	-324	201.558
SRX8701149	Ythdc1	ES cells	4127	435/4398	46/93663	-324	-324	201.393
SRX11417003	GFP	ES cells	2779	813/4398	86/93663	-324	-324	201.328
SRX027460	E2f4	iPS cells	5250	1661/4398	177/93663	-324	-324	199.852
SRX9450297	Epitope tags	ES cells	1887	581/4398	62/93663	-324	-324	199.571
SRX1177003	Brd4	ES cells	4509	848/4398	91/93663	-324	-324	198.457
SRX9641223	Tcf4	EpiLC	1843	363/4398	39/93663	-324	-324	198.223
SRX2486175	Epitope tags	ES cells	4893	1432/4398	154/93663	-324	-324	198.032
SRX4397588	Pou5f1	iPS cells	990	333/4398	36/93663	-324	-324	196.995
SRX017059	Supt5	ES cells	4542	1156/4398	125/93663	-324	-324	196.952
SRX9641221	Tcf4	EpiLC	2166	451/4398	49/93663	-324	-324	196.017
SRX11221912	Taf1	ES cells	5727	1681/4398	183/93663	-324	-324	195.627
SRX825832	Runx1	mESC derived myeloid progenitors	6478	1724/4398	188/93663	-324	-324	195.296
SRX022048	Tbp	ES cells	6224	1623/4398	177/93663	-324	-324	195.28
SRX047139	Hdac2	ES cells	2510	339/4398	37/93663	-324	-324	195.124
SRX14663256	Pml	ES cells	8727	2321/4398	254/93663	-324	-324	194.605
SRX5371701	Sp1	ES cells	4591	1475/4398	162/93663	-324	-324	193.905
SRX5850129	Nrf1	ES cells	4379	1528/4398	168/93663	-324	-324	193.699
SRX7568557	Dendra2	ES cells	2517	745/4398	82/93663	-324	-324	193.489
SRX8701295	Ythdc1	ES cells	4322	354/4398	39/93663	-324	-324	193.309
SRX2658702	Biotin	ES cells	1480	298/4398	33/93663	-324	-324	192.316
SRX3030270	GFP	ES cells	1044	396/4398	44/93663	-324	-324	191.671
SRX7670005	Gtf2b	ES cells	6188	1572/4398	175/93663	-324	-324	191.305
SRX11221931	Med4	ES cells	4382	1185/4398	132/93663	-324	-324	191.187
SRX015832	Kdm5a	ES cells	4406	1219/4398	136/93663	-324	-324	190.888
SRX9450296	Epitope tags	ES cells	2797	858/4398	96/93663	-324	-324	190.339
SRX14663258	Smad2	ES cells	8858	1983/4398	223/93663	-324	-324	189.379
SRX8273535	GFP	ES cells	1618	488/4398	55/93663	-324	-324	188.96
SRX319554	Max	ES cells	1763	390/4398	44/93663	-324	-324	188.766
SRX4397590	Pou5f1	iPS cells	3671	1338/4398	151/93663	-324	-324	188.709
SRX1036410	Pou5f1	ES cells	5009	1407/4398	159/93663	-324	-324	188.456
SRX11417010	GFP	ES cells	5411	1362/4398	154/93663	-324	-324	188.352
SRX1519397	Biotin	ES cells	1040	309/4398	35/93663	-324	-324	188.02
SRX9424491	GFP	ES cells	5480	741/4398	84/93663	-324	-324	187.868
SRX13439142	DNA-RNA hybrid	ES cells	5057	1003/4398	114/93663	-324	-324	187.374
SRX1089842	Gtf2b	Embryoid Bodies	5880	1891/4398	215/93663	-324	-324	187.312
SRX7541944	Hif1a	EpiSC	1568	404/4398	46/93663	-324	-324	187.041
SRX9424477	Ep400	ES cells	5027	1752/4398	200/93663	-324	-324	186.559
SRX3030275	GFP	mESC derived neural cells	2358	726/4398	83/93663	-324	-324	186.282
SRX14663257	Smad2	ES cells	8270	1938/4398	222/93663	-324	-324	185.915
SRX10445773	Epitope tags	ES cells	2946	667/4398	77/93663	-324	-324	184.479
SRX590274	Ep300	mESCs, differentiated	2601	276/4398	32/93663	-324	-324	183.684
SRX1093866	Epitope tags	F9	1280	275/4398	32/93663	-324	-324	183.019
SRX19028472	Cpsf3l	ES cells	8178	1845/4398	215/93663	-324	-324	182.756
SRX13440027	Maz	ES cells	1733	326/4398	38/93663	-324	-324	182.703
SRX3200440	Cdk9	mESC derived haemogenic endothelium	2993	599/4398	70/93663	-324	-324	182.239
SRX7711378	Ythdc1	ES cells	4708	589/4398	69/93663	-324	-324	181.794
SRX8701242	Ythdc1	ES cells	4708	589/4398	69/93663	-324	-324	181.794
SRX9641174	Tcf4	ES cells	1819	358/4398	42/93663	-324	-324	181.529
SRX1036412	Pou5f1	ES cells	4875	1363/4398	160/93663	-324	-324	181.421
SRX7670004	Gtf2b	ES cells	7066	1768/4398	208/93663	-324	-324	181.022
SRX8701146	Ythdc1	ES cells	3528	340/4398	40/93663	-324	-324	181.022
SRX1690194	Nrf1	ES cells	4401	1670/4398	197/93663	-324	-324	180.536
SRX1089841	Gtf2b	ES cells	1849	533/4398	63/93663	-324	-324	180.177
SRX9424490	GFP	ES cells	5752	769/4398	91/93663	-324	-324	179.969
SRX5883469	Stat3	ES cells	2498	405/4398	48/93663	-324	-324	179.691
SRX13439146	DNA-RNA hybrid	ES cells	6741	1363/4398	162/93663	-324	-324	179.182
SRX11417018	GFP	ES cells	6365	1588/4398	189/93663	-324	-324	178.938
SRX1602659	Kmt2b	ES cells	4974	947/4398	113/93663	-324	-324	178.478
SRX11221909	Taf1	ES cells	7130	1892/4398	226/93663	-324	-324	178.289
SRX4397582	Pou5f1	iPS cells	1826	648/4398	78/93663	-324	-324	176.927
SRX19028416	0610010K14Rik	ES cells	5721	1203/4398	145/93663	-324	-324	176.689
SRX11417011	GFP	ES cells	6965	2045/4398	247/93663	-324	-324	176.323
SRX3175620	Setd1a	ES cells	7387	2241/4398	271/93663	-324	-324	176.111
SRX5600739	Kmt2b	ES cells	1809	355/4398	43/93663	-324	-324	175.822
SRX11417009	GFP	ES cells	5669	1485/4398	180/93663	-324	-324	175.698
SRX14059496	Arid2	ES cells	2122	330/4398	40/93663	-324	-324	175.698
SRX7568547	Dendra2	ES cells	2778	823/4398	100/93663	-324	-324	175.272
SRX091894	Raf1	ES cells	2146	336/4398	41/93663	-324	-324	174.529
SRX15213761	Zfp281	ES cells	1630	549/4398	67/93663	-324	-324	174.506
SRX9637871	Hcfc1	ES cells	1416	549/4398	67/93663	-324	-324	174.506
SRX5850140	Sp1	ES cells	4165	867/4398	106/93663	-324	-324	174.191
SRX11221930	Med4	ES cells	6023	1554/4398	190/93663	-324	-324	174.185
SRX9424475	Ep400	ES cells	6083	2042/4398	250/93663	-324	-324	173.952
SRX3602876	Brd4	iPS cells	6889	749/4398	92/93663	-324	-324	173.383
SRX1639488	Elob	ES cells	1257	301/4398	37/93663	-324	-324	173.252
SRX19951047	Epitope tags	ES cells	2382	520/4398	64/93663	-324	-324	173.036
SRX1519392	Biotin	ES cells	5230	1153/4398	142/93663	-324	-324	172.923
SRX1829027	Aebp2	ES cells	5409	763/4398	94/93663	-324	-324	172.866
SRX5001424	Yy1	ES cells	2479	430/4398	53/93663	-324	-324	172.785
SRX027337	Rfx1	mESC derived neural cells	3113	679/4398	84/93663	-324	-324	172.149
SRX1602646	Kmt2b	ES cells	2639	435/4398	54/93663	-324	-324	171.557
SRX14059497	Arid2	ES cells	3170	507/4398	63/93663	-324	-324	171.388
SRX11417008	GFP	ES cells	4773	1268/4398	158/93663	-324	-324	170.913
SRX9731387	Epitope tags	ES cells	6703	1547/4398	193/93663	-324	-324	170.705
SRX14976490	Yy1	ES cells	1291	288/4398	36/93663	-324	-324	170.374
SRX11221910	Taf1	ES cells	8780	2208/4398	277/93663	-324	-324	169.759
SRX8701297	Ythdc1	ES cells	4690	366/4398	46/93663	-324	-324	169.448
SRX13439144	DNA-RNA hybrid	ES cells	2018	437/4398	55/93663	-324	-324	169.212
SRX14134854	Epitope tags	ES cells	8697	2006/4398	253/93663	-324	-324	168.859
SRX7568555	Dendra2	ES cells	1918	570/4398	72/93663	-324	-324	168.599
SRX10111435	Ino80	ES cells	4579	649/4398	82/93663	-324	-324	168.556
SRX2415039	Mettl3	ES cells	5468	1051/4398	133/93663	-324	-324	168.292
SRX7568549	Dendra2	ES cells	1313	386/4398	49/93663	-324	-324	167.766
SRX14059479	Arid2	ES cells	3900	622/4398	79/93663	-324	-324	167.678
SRX8701298	Ythdc1	ES cells	4319	461/4398	59/93663	-324	-324	166.403
SRX14134864	Supt5	ES cells	9071	2179/4398	279/93663	-324	-324	166.328
SRX2897262	E2f1	ES cells	3840	686/4398	88/93663	-324	-324	166.018
SRX7568550	Dendra2	ES cells	1086	288/4398	37/93663	-324	-324	165.769
SRX208062	Rara	ES cells	7961	793/4398	102/93663	-324	-324	165.572
SRX368299	Kat8	ES cells	2870	746/4398	96/93663	-324	-324	165.493
SRX19028438	Epitope tags	ES cells	6390	1140/4398	147/93663	-324	-324	165.158
SRX3602859	Brd4	iPS cells	8997	876/4398	113/93663	-324	-324	165.097
SRX1602654	Kmt2b	ES cells	5418	1046/4398	135/93663	-324	-324	165.01
SRX5850137	Nrf1	ES cells	5818	1553/4398	201/93663	-324	-324	164.546
SRX1690191	Nrf1	ES cells	4844	1709/4398	222/93663	-324	-324	163.946
SRX10445758	Epitope tags	ES cells	2959	754/4398	98/93663	-324	-324	163.854
SRX5001425	Yy1	ES cells	1937	346/4398	45/93663	-324	-324	163.748
SRX6716555	Ash2l	ES cells	4191	776/4398	101/93663	-324	-324	163.626
SRX3825668	Hdac1	ES cells	1844	430/4398	56/93663	-324	-324	163.528
SRX10445761	Epitope tags	ES cells	1568	399/4398	52/93663	-324	-324	163.411
SRX19951048	Epitope tags	ES cells	1732	368/4398	48/93663	-324	-324	163.275
SRX11417017	GFP	ES cells	5708	1469/4398	192/93663	-324	-324	162.942
SRX14059478	Arid2	ES cells	1964	298/4398	39/93663	-324	-324	162.729
SRX14617741	Ash1l	ES cells	4404	1085/4398	142/93663	-324	-324	162.725
SRX9637870	Hcfc1	ES cells	1951	701/4398	92/93663	-324	-324	162.272
SRX12622653	Med14	ES cells	2953	830/4398	109/93663	-324	-324	162.168
SRX2404541	Sin3a	NSC-derived iPS cells	5809	1591/4398	209/93663	-324	-324	162.12
SRX8722031	Ythdc1	ES cells	6318	912/4398	120/93663	-324	-324	161.855
SRX6716554	Ash2l	ES cells	6436	1375/4398	181/93663	-324	-324	161.785
SRX9731388	Epitope tags	ES cells	4142	591/4398	78/93663	-324	-324	161.364
SRX3751912	Brd9	ES cells	5003	1520/4398	201/93663	-324	-324	161.05
SRX10445760	Epitope tags	ES cells	3623	884/4398	117/93663	-324	-324	160.909
SRX14663259	Smad2	ES cells	10078	2259/4398	299/93663	-324	-324	160.901
SRX1280440	Nrf1	mESC derived neural cells	8291	2234/4398	296/93663	-324	-324	160.733
SRX1688324	Gtf3c1	ES cells	8642	2171/4398	288/93663	-324	-324	160.539
SRX5883474	Stat3	ES cells	7846	1092/4398	145/93663	-324	-324	160.386
SRX2545590	Tet3	ES cells	2266	451/4398	60/93663	-324	-324	160.08
SRX4397577	Pou5f1	iPS cells	7823	2112/4398	281/93663	-324	-324	160.066
SRX2486180	Cxxc1	ES cells	8508	1592/4398	212/93663	-324	-324	159.926
SRX104410	Cdk9	ES cells	2167	389/4398	52/93663	-324	-324	159.316
SRX208055	Rara	ES cells	14742	1815/4398	243/93663	-324	-324	159.068
SRX091896	Tbp	ES cells	6947	1206/4398	162/93663	-324	-324	158.542
SRX3602870	Brd4	iPS cells	6667	848/4398	114/93663	-324	-324	158.418
SRX11417016	GFP	ES cells	7470	2230/4398	300/93663	-324	-324	158.306
SRX2172620	Brd4	iPS cells	4477	520/4398	70/93663	-324	-324	158.204
SRX14134863	Supt5	ES cells	9399	2228/4398	300/93663	-324	-324	158.164
SRX9424459	Ino80	ES cells	3206	564/4398	76/93663	-324	-324	158.044
SRX1280442	Nrf1	mESC derived neural cells	9807	2424/4398	327/93663	-324	-324	157.869
SRX3602862	Brd4	iPS cells	6288	889/4398	120/93663	-324	-324	157.773
SRX11417006	GFP	ES cells	6299	1739/4398	236/93663	-324	-324	156.928
SRX1690193	Nrf1	ES cells	4471	1671/4398	227/93663	-324	-324	156.77
SRX4403332	Sin3a	ES cells	3094	718/4398	98/93663	-324	-324	156.031
SRX3602861	Brd4	iPS cells	8027	1135/4398	155/93663	-324	-324	155.947
SRX1602647	Kmt2b	ES cells	6310	1052/4398	144/93663	-324	-324	155.584
SRX342721	Kmt2d	Embryoid Bodies	9620	2357/4398	323/93663	-324	-324	155.407
SRX2172626	Brd4	iPS cells	4068	467/4398	64/93663	-324	-324	155.4
SRX2404542	Sin3a	NSC-derived iPS cells	4505	1189/4398	163/93663	-324	-324	155.349
SRX2754635	Prdm15	ES cells	4256	582/4398	80/93663	-324	-324	154.934
SRX12702092	GFP	ES cells	9674	1789/4398	246/93663	-324	-324	154.877
SRX13440033	Maz	mESC derived neural cells	6415	1141/4398	157/93663	-324	-324	154.774
SRX17045822	Nelfe	ES cells	7956	2104/4398	290/93663	-324	-324	154.511
SRX2353881	Cbx2	ES cells	1310	290/4398	40/93663	-324	-324	154.401
SRX11221911	Taf1	ES cells	7977	2084/4398	288/93663	-324	-324	154.105
SRX5850146	Sp1	ES cells	5292	1172/4398	162/93663	-324	-324	154.073
SRX373166	GFP	ES cells	4612	1519/4398	210/93663	-324	-324	154.046
SRX873340	Sirt6	ES cells	2284	376/4398	52/93663	-324	-324	153.992
SRX368308	Kat8	mESC derived neural cells	3003	765/4398	106/93663	-324	-324	153.698
SRX9731385	Epitope tags	ES cells	8053	1346/4398	187/93663	-324	-324	153.291
SRX4681584	Kdm1a	ES cells	1865	331/4398	46/93663	-324	-324	153.244
SRX9195291	Epitope tags	ES cells	9009	2143/4398	298/93663	-324	-324	153.151
SRX997158	Brd4	ES cells	6833	1021/4398	142/93663	-324	-324	153.126
SRX4403320	Sin3a	ES cells	5037	1147/4398	160/93663	-324	-324	152.671
SRX1089840	Gtf2b	ES cells	5125	1548/4398	216/93663	-324	-324	152.627
SRX16844928	GFP	ES cells	7423	1874/4398	262/93663	-324	-324	152.328
SRX15057954	Zic2	mESCs, differentiated	4486	944/4398	132/93663	-324	-324	152.304
SRX14134858	Supt5	ES cells	10564	2356/4398	330/93663	-324	-324	152.046
SRX9195294	Epitope tags	ES cells	9465	2097/4398	294/93663	-324	-324	151.902
SRX1639483	Epop	ES cells	4880	1082/4398	152/93663	-324	-324	151.599
SRX368298	Kat8	ES cells	2448	633/4398	89/93663	-324	-324	151.47
SRX2831931	Kmt2d	ES cells	6875	1272/4398	179/93663	-324	-324	151.338
SRX3030268	Zbtb2	ES cells	5308	1456/4398	205/93663	-324	-324	151.259
SRX368309	Kat8	mESC derived neural cells	2711	724/4398	102/93663	-324	-324	151.165
SRX10978094	Banp	mESC derived neural cells	3234	759/4398	107/93663	-324	-324	151.067
SRX104386	Ncapd3	ES cells	9384	2140/4398	302/93663	-324	-324	150.911
SRX2245716	Brd4	ES cells	6618	679/4398	96/93663	-324	-324	150.63
SRX9424476	Ep400	ES cells	7352	2240/4398	317/93663	-324	-324	150.488
SRX2638678	Htatsf1	ES cells	4869	1321/4398	187/93663	-324	-324	150.444
SRX9424457	Ruvbl2	ES cells	2927	381/4398	54/93663	-324	-324	150.26
SRX11676996	Rpa1	ES cells	8939	2189/4398	311/93663	-324	-324	149.899
SRX9424460	Ino80	ES cells	2710	534/4398	76/93663	-324	-324	149.638
SRX022694	Med1	ES cells	3307	871/4398	124/93663	-324	-324	149.592
SRX2172621	Brd4	iPS cells	5854	694/4398	99/93663	-324	-324	149.292
SRX404387	Nsl1	ES cells	2861	658/4398	94/93663	-324	-324	149.077
SRX19028477	Ints5	ES cells	9177	2083/4398	298/93663	-324	-324	148.863
SRX15464337	Brca2	ES cells	1240	279/4398	40/93663	-324	-324	148.545
SRX5850148	Sp1	ES cells	5752	1297/4398	186/93663	-324	-324	148.505
SRX11221923	Ercc3	ES cells	13835	2353/4398	338/93663	-324	-324	148.258
SRX4403326	Sin3a	ES cells	8668	1805/4398	260/93663	-324	-324	147.848
SRX9637869	Hcfc1	ES cells	1962	715/4398	103/93663	-324	-324	147.836
SRX9596424	Trim28	ES cells	15377	2362/4398	341/93663	-324	-324	147.516
SRX3602881	Brd4	iPS cells	3137	464/4398	67/93663	-324	-324	147.488
SRX2545589	Tet3	ES cells	3766	803/4398	116/93663	-324	-324	147.425
SRX3581848	E2f6	ES cells	5725	1231/4398	178/93663	-324	-324	147.282
SRX16844927	GFP	ES cells	8939	2397/4398	347/93663	-324	-324	147.113
SRX17045821	Nelfe	ES cells	9084	2263/4398	328/93663	-324	-324	146.934
SRX3602868	Brd4	iPS cells	8059	1090/4398	158/93663	-324	-324	146.92
SRX11998572	Hdac1	ES cells	7107	1200/4398	174/93663	-324	-324	146.874
SRX13439141	Xrn2	ES cells	8493	1371/4398	199/93663	-324	-324	146.723
SRX9450258	Nelfe	ES cells	12111	2466/4398	358/93663	-324	-324	146.698
SRX039033	Rnf2	ES cells	1803	302/4398	44/93663	-324	-324	146.173
SRX3602873	Brd4	iPS cells	4739	453/4398	66/93663	-324	-324	146.173
SRX16844929	GFP	ES cells	6126	1571/4398	229/93663	-324	-324	146.101
SRX5850143	Sp1	ES cells	8035	1591/4398	232/93663	-324	-324	146.048
SRX128218	Pou5f1	ES cells	2175	363/4398	53/93663	-324	-324	145.862
SRX3200438	Brd4	mESC derived haemogenic endothelium	7847	1896/4398	277/93663	-324	-324	145.771
SRX2831930	Kmt2d	ES cells	7323	1306/4398	191/93663	-324	-324	145.621
SRX1053802	Kat5	ES cells	6861	1612/4398	236/93663	-324	-324	145.467
SRX5394949	Myc	ES cells	5193	1227/4398	181/93663	-324	-324	144.371
SRX9424461	Ino80	ES cells	2705	549/4398	81/93663	-324	-324	144.344
SRX4301428	Smarca4	mESC derived cardiac cells	4921	745/4398	110/93663	-324	-324	144.237
SRX5850142	Sp1	ES cells	8472	1821/4398	269/93663	-324	-324	144.169
SRX16989253	Sox2	ES cells	10484	2180/4398	323/93663	-324	-324	143.736
SRX764230	Epop	ES cells	14132	1187/4398	176/93663	-324	-324	143.632
SRX17708153	L3mbtl2	ES cells	4949	816/4398	121/93663	-324	-324	143.621
SRX8701147	Ythdc1	ES cells	6839	936/4398	139/93663	-324	-324	143.408
SRX4980260	Hoxb1	ES cells	2876	457/4398	68/93663	-324	-324	143.127
SRX15057959	Zic2	mESCs, differentiated	7765	1739/4398	259/93663	-324	-324	142.992
SRX3030271	Zbtb2	ES cells	7376	1697/4398	253/93663	-324	-324	142.848
SRX368312	Kansl3	mESC derived neural cells	6397	1542/4398	230/93663	-324	-324	142.781
SRX5850147	Sp1	ES cells	7857	1541/4398	230/93663	-324	-324	142.688
SRX142126	Kat8	ES cells	6989	1199/4398	179/93663	-324	-324	142.652
SRX13439143	DNA-RNA hybrid	ES cells	3223	529/4398	79/93663	-324	-324	142.607
SRX19028475	Ints5	ES cells	8670	1757/4398	263/93663	-324	-324	142.275
SRX3602871	Brd4	iPS cells	3595	447/4398	67/93663	-324	-324	142.084
SRX5850161	Yy1	ES cells	5983	659/4398	99/93663	-324	-324	141.763
SRX3602880	Brd4	iPS cells	5413	559/4398	84/93663	-324	-324	141.725
SRX5850141	Sp1	ES cells	6704	1574/4398	237/93663	-324	-324	141.439
SRX104382	Ncaph2	ES cells	5237	1134/4398	171/93663	-324	-324	141.231
SRX9450259	Nelfe	ES cells	13836	2418/4398	365/93663	-324	-324	141.084
SRX3602875	Brd4	iPS cells	2354	304/4398	46/93663	-324	-324	140.744
SRX997162	Brd4	ES cells	8530	1368/4398	207/93663	-324	-324	140.744
SRX3424224	Epitope tags	mESC derived neural cells	2374	350/4398	53/93663	-324	-324	140.639
SRX997154	Brd2	ES cells	8477	1424/4398	216/93663	-324	-324	140.401
SRX368305	Kansl3	ES cells	5365	1033/4398	157/93663	-324	-324	140.124
SRX17045817	Nelfe	ES cells	9792	2375/4398	361/93663	-324	-324	140.11
SRX6784013	Chd2	ES cells	5353	1024/4398	156/93663	-324	-324	139.794
SRX16844899	GFP	ES cells	8359	2212/4398	337/93663	-324	-324	139.787
SRX11417012	GFP	ES cells	11591	2355/4398	359/93663	-324	-324	139.704
SRX14210091	Ing5	ES cells	2133	393/4398	60/93663	-324	-324	139.494
SRX12622655	Med14	ES cells	5560	1440/4398	220/93663	-324	-324	139.397
SRX868181	Fgfr1	ES cells	11532	2674/4398	409/93663	-324	-324	139.236
SRX10445759	Epitope tags	ES cells	1417	320/4398	49/93663	-324	-324	139.081
SRX3602879	Brd4	iPS cells	11867	1508/4398	232/93663	-324	-324	138.429
SRX1997143	Ep300	ES cells	2343	433/4398	67/93663	-324	-324	137.634
SRX5850156	Yy1	ES cells	7070	759/4398	118/93663	-324	-324	136.985
SRX2545594	Tet3	ES cells	4873	1042/4398	162/93663	-324	-324	136.983
SRX3200437	Brd4	mESC derived haemogenic endothelium	8221	1858/4398	289/93663	-324	-324	136.918
SRX11221880	Med1	ES cells	7174	1663/4398	259/93663	-324	-324	136.743
SRX5850149	Sp1	ES cells	5644	995/4398	155/93663	-324	-324	136.711
SRX3666117	Epitope tags	ES cells	2914	552/4398	86/93663	-324	-324	136.695
SRX8701296	Ythdc1	ES cells	6962	924/4398	144/93663	-324	-324	136.654
SRX6094543	Kdm2a	ES cells	5467	455/4398	71/93663	-324	-324	136.479
SRX15652597	Nipbl	ES cells	7997	1736/4398	271/93663	-324	-324	136.425
SRX19028417	0610010K14Rik	ES cells	10018	2046/4398	320/93663	-324	-324	136.166
SRX8754229	Runx1	ES cells	7712	1400/4398	219/93663	-324	-324	136.143
SRX695698	Mbd3	ES cells	1662	294/4398	46/93663	-324	-324	136.114
SRX5784019	Brd4	ES cells	8301	645/4398	101/93663	-324	-324	136.004
SRX16844915	GFP	ES cells	10175	2286/4398	358/93663	-324	-324	135.99
SRX997161	Brd4	ES cells	7980	1117/4398	175/93663	-324	-324	135.934
SRX085107	Ncaph2	ES cells	2144	503/4398	79/93663	-324	-324	135.598
SRX8832796	Epitope tags	ES cells	9642	1209/4398	190/93663	-324	-324	135.514
SRX1517381	Epop	ES cells	11137	2198/4398	346/93663	-324	-324	135.29
SRX368304	Kansl3	ES cells	4913	1092/4398	172/93663	-324	-324	135.209
SRX5850160	Yy1	ES cells	6531	711/4398	112/93663	-324	-324	135.196
SRX2172624	Brd4	ES cells	9007	1000/4398	158/93663	-324	-324	134.789
SRX1690192	Nrf1	ES cells	6131	1929/4398	305/93663	-324	-324	134.693
SRX7643904	Smad1	ES cells	5635	1137/4398	180/93663	-324	-324	134.524
SRX8701160	Mettl3	ES cells	8002	838/4398	133/93663	-324	-324	134.185
SRX368313	Kansl3	mESC derived neural cells	7769	1817/4398	289/93663	-324	-324	133.897
SRX11417013	GFP	ES cells	8811	2175/4398	346/93663	-324	-324	133.874
SRX1165111	Epitope tags	ES cells	3074	616/4398	98/93663	-324	-324	133.865
SRX13440025	Maz	mESC derived neural cells	4868	847/4398	135/93663	-324	-324	133.617
SRX8003649	Dendra2	ES cells	7940	2145/4398	342/93663	-324	-324	133.572
SRX6071859	Pcgf6	ES cells	3904	834/4398	133/93663	-324	-324	133.545
SRX3602866	Brd4	iPS cells	6730	765/4398	122/93663	-324	-324	133.541
SRX3581849	E2f6	ES cells	7316	1536/4398	245/93663	-324	-324	133.517
SRX9424458	Ino80	ES cells	3695	608/4398	97/93663	-324	-324	133.489
SRX2172625	Brd4	iPS cells	5838	689/4398	110/93663	-324	-324	133.395
SRX2875255	Kmt2b	ES cells	7994	881/4398	141/93663	-324	-324	133.067
SRX2545593	Tet3	ES cells	7785	1942/4398	312/93663	-324	-324	132.558
SRX4506776	Brd4	ES cells	8916	2252/4398	363/93663	-324	-324	132.122
SRX8701268	Mettl3	ES cells	4238	316/4398	51/93663	-324	-324	131.956
SRX10111409	Chd8	ES cells	14868	2308/4398	373/93663	-324	-324	131.777
SRX3602863	Brd4	iPS cells	5002	829/4398	134/93663	-324	-324	131.754
SRX3602869	Brd4	iPS cells	4700	742/4398	120/93663	-324	-324	131.685
SRX12622659	Cdk8	ES cells	6512	1446/4398	234/93663	-324	-324	131.603
SRX11221950	Taf12	ES cells	10750	2161/4398	350/93663	-324	-324	131.492
SRX19028436	Epitope tags	ES cells	11920	1931/4398	313/93663	-324	-324	131.387
SRX14059472	Arid2	ES cells	3357	547/4398	89/93663	-324	-324	130.891
SRX8003651	Dendra2	ES cells	8733	2328/4398	379/93663	-324	-324	130.815
SRX7568556	Dendra2	ES cells	5228	1392/4398	228/93663	-324	-324	130.022
SRX14210122	Ing5	ES cells	5150	958/4398	157/93663	-324	-324	129.951
SRX4580516	Brd9	ES cells	8752	2383/4398	391/93663	-324	-324	129.796
SRX9424471	Ino80	ES cells	4250	719/4398	118/93663	-324	-324	129.766
SRX4578586	Epitope tags	ES cells	9750	2332/4398	383/93663	-324	-324	129.671
SRX6078360	Ezh2	ES cells	8456	1102/4398	181/93663	-324	-324	129.663
SRX1670221	Med12	ES cells	4841	1133/4398	187/93663	-324	-324	129.033
SRX14134853	Epitope tags	ES cells	11769	2457/4398	406/93663	-324	-324	128.882
SRX2539820	Hdac1	ES cells	10197	1458/4398	241/93663	-324	-324	128.841
SRX3825598	Hdac1	ES cells	2838	489/4398	81/93663	-324	-324	128.569
SRX1521296	Zmynd8	ES cells	5706	585/4398	97/93663	-324	-324	128.439
SRX17708154	L3mbtl2	ES cells	6219	1066/4398	177/93663	-324	-324	128.262
SRX2152805	Kmt2b	ES cells	13979	2523/4398	419/93663	-324	-324	128.238
SRX13439140	Xrn2	ES cells	10702	1666/4398	277/93663	-324	-324	128.088
SRX9450254	Setd1a	ES cells	14927	2794/4398	465/93663	-324	-324	127.964
SRX213834	Supt5	ES cells	15063	2569/4398	428/93663	-324	-324	127.83
SRX3898498	Med1	ES cells	7896	1746/4398	291/93663	-324	-324	127.78
SRX7669997	Tbp	ES cells	1761	366/4398	61/93663	-324	-324	127.78
SRX504219	Kdm1a	mESC derived mesodermal cells	4244	994/4398	166/93663	-324	-324	127.524
SRX7687366	Pou5f1	EpiLC	1963	353/4398	59/93663	-324	-324	127.419
SRX12622650	Med14	ES cells	8779	2045/4398	342/93663	-324	-324	127.344
SRX13476151	Maz	mESC derived neural cells	9799	1657/4398	278/93663	-324	-324	126.938
SRX4167126	Gtf2b	ES cells	13715	2865/4398	481/93663	-324	-324	126.851
SRX978378	Ep400	ES cells	3885	601/4398	101/93663	-324	-324	126.726
SRX9450506	Med1	ES cells	1844	309/4398	52/93663	-324	-324	126.552
SRX2991405	Tet1	ES cells	2807	511/4398	86/93663	-324	-324	126.542
SRX9195281	Epitope tags	ES cells	11125	2364/4398	398/93663	-324	-324	126.496
SRX026257	Smad3	ES cells	4612	889/4398	150/93663	-324	-324	126.219
SRX14976486	Yy1	ES cells	5863	681/4398	115/93663	-324	-324	126.114
SRX10978092	Banp	mESC derived neural cells	3466	787/4398	133/93663	-324	-324	126.019
SRX3175619	Setd1a	ES cells	9428	2490/4398	422/93663	-324	-324	125.661
SRX20288175	Ep300	ES cells	1473	289/4398	49/93663	-324	-324	125.607
SRX6071860	Pcgf6	ES cells	5648	1132/4398	192/93663	-324	-324	125.562
SRX19028478	Ints5	ES cells	12062	2492/4398	423/93663	-324	-324	125.464
SRX11417000	GFP	ES cells	9900	2097/4398	356/93663	-324	-324	125.447
SRX997157	Brd4	ES cells	9318	1436/4398	244/93663	-324	-324	125.336
SRX12622657	Med14	ES cells	2673	623/4398	106/93663	-324	-324	125.168
SRX2647968	Kdm5c	EpiLC	4981	1034/4398	176/93663	-324	-324	125.118
ERX2789783	Hdac3	ES cells	1341	311/4398	53/93663	-324	-324	124.968
SRX5850105	Gabpa	ES cells	7441	1197/4398	204/93663	-324	-324	124.962
SRX8003652	Dendra2	ES cells	7642	2059/4398	351/93663	-324	-324	124.929
SRX085108	Ncaph2	ES cells	1975	381/4398	65/93663	-324	-324	124.832
SRX5850103	Gabpa	ES cells	4743	885/4398	151/93663	-324	-324	124.819
SRX9596425	Trim28	ES cells	17706	2507/4398	428/93663	-324	-324	124.745
SRX12622654	Med14	ES cells	7089	1821/4398	311/93663	-324	-324	124.699
SRX214081	Pou5f1	ES cells	14472	2715/4398	464/93663	-324	-324	124.613
SRX11221942	Taf12	ES cells	11810	2268/4398	388/93663	-324	-324	124.487
SRX17045819	Epitope tags	ES cells	10566	2448/4398	419/93663	-324	-324	124.426
SRX19951052	Epitope tags	ES cells	3660	741/4398	127/93663	-324	-324	124.259
SRX3602883	Brd4	iPS cells	6639	1336/4398	229/93663	-324	-324	124.246
SRX11221943	Taf12	ES cells	10364	2357/4398	405/93663	-324	-324	123.942
SRX13999590	Nelfe	ES cells	14294	2562/4398	441/93663	-324	-324	123.724
SRX9450260	Nelfe	ES cells	15304	2717/4398	468/93663	-324	-324	123.639
SRX1602645	Kmt2b	ES cells	13075	2297/4398	396/93663	-324	-324	123.532
SRX5817879	Zic2	ES cells	3326	742/4398	128/93663	-324	-324	123.454
SRX11417007	GFP	ES cells	9013	2051/4398	354/93663	-324	-324	123.389
SRX022047	Tbp	ES cells	13437	2812/4398	486/93663	-324	-324	123.223
SRX1556181	Epitope tags	ES cells	1867	312/4398	54/93663	-324	-324	123.048
SRX16844922	GFP	ES cells	9823	2569/4398	445/93663	-324	-324	122.947
SRX12622656	Med14	ES cells	4665	1073/4398	186/93663	-324	-324	122.857
SRX5850139	Sp1	ES cells	10234	2244/4398	389/93663	-324	-324	122.853
SRX518333	Nfya	ES cells	4293	1101/4398	191/93663	-324	-324	122.763
SRX1688322	Ncaph2	ES cells	6783	1026/4398	178/93663	-324	-324	122.755
SRX20248717	Trim28	ES cells	15528	1147/4398	199/93663	-324	-324	122.75
SRX5850151	Yy1	ES cells	6859	703/4398	122/93663	-324	-324	122.718
SRX5850153	Yy1	ES cells	8764	862/4398	150/93663	-324	-324	122.385
SRX8003650	Dendra2	ES cells	7614	1951/4398	340/93663	-324	-324	122.206
SRX9467493	Epitope tags	EpiSC	4872	763/4398	133/93663	-324	-324	122.176
SRX312229	Max	ES cells	4781	780/4398	136/93663	-324	-324	122.143
SRX4167128	Gtf2b	ES cells	15211	2953/4398	516/93663	-324	-324	121.878
SRX6422758	Pcgf6	ES cells	2160	492/4398	86/93663	-324	-324	121.837
SRX3602867	Brd4	iPS cells	14584	1938/4398	339/93663	-324	-324	121.749
SRX3602872	Brd4	iPS cells	4057	343/4398	60/93663	-324	-324	121.746
SRX1980012	Crebbp	EpiSC	5560	828/4398	145/93663	-324	-324	121.612
SRX2486179	Cxxc1	ES cells	12686	2300/4398	403/93663	-324	-324	121.545
SRX5850144	Sp1	ES cells	10739	2339/4398	410/93663	-324	-324	121.495
SRX9467492	Epitope tags	EpiSC	7723	1198/4398	210/93663	-324	-324	121.493
SRX021438	Spi1	mESC derived haematopoietic progenitor	2575	405/4398	71/93663	-324	-324	121.481
SRX9424470	Ino80	ES cells	4318	729/4398	128/93663	-324	-324	121.292
SRX17045818	Nelfe	ES cells	11113	2550/4398	448/93663	-324	-324	121.22
SRX14976487	Yy1	ES cells	5455	739/4398	130/93663	-324	-324	121.064
SRX5251391	Smad2	Embryoid Bodies	9577	2020/4398	356/93663	-324	-324	120.841
SRX13439145	DNA-RNA hybrid	ES cells	8140	902/4398	159/93663	-324	-324	120.815
SRX9195287	Epitope tags	ES cells	11111	2339/4398	413/93663	-324	-324	120.613
SRX021436	Spi1	mESC derived haematopoietic progenitor	6007	872/4398	154/93663	-324	-324	120.589
SRX7568543	Dendra2	ES cells	4025	872/4398	154/93663	-324	-324	120.589
SRX16844898	GFP	ES cells	10894	2534/4398	448/93663	-324	-324	120.46
SRX19028476	Ints5	ES cells	12711	2322/4398	411/93663	-324	-324	120.319
SRX3021907	Hdac1	mESC derived haemogenic endothelium	2774	299/4398	53/93663	-324	-324	120.146
SRX9195282	Epitope tags	ES cells	12069	2491/4398	442/93663	-324	-324	120.023
SRX14663260	Smad2	ES cells	15455	2750/4398	488/93663	-324	-324	120.012
SRX1741140	Sin3a	ES cells	1584	332/4398	59/93663	-324	-324	119.839
SRX10978093	Banp	mESC derived neural cells	3665	799/4398	142/93663	-324	-324	119.832
SRX342720	Kmt2d	Embryoid Bodies	9952	1911/4398	340/93663	-324	-324	119.7
SRX1622690	GFP	ES cells	2080	354/4398	63/93663	-324	-324	119.667
SRX5850159	Yy1	ES cells	10055	1031/4398	184/93663	-324	-324	119.331
SRX5850104	Gabpa	ES cells	5097	734/4398	131/93663	-324	-324	119.327
SRX9195319	Tbp	ES cells	10097	2196/4398	392/93663	-324	-324	119.305
SRX518334	Nfyb	ES cells	2829	694/4398	124/93663	-324	-324	119.193
SRX2486172	Epitope tags	ES cells	11236	2680/4398	479/93663	-324	-324	119.155
SRX5850145	Sp1	ES cells	12640	2154/4398	385/93663	-324	-324	119.151
SRX7176639	Zscan4c	ES cells	7373	906/4398	162/93663	-324	-324	119.104
SRX054580	Dpy30	ES cells	14740	1928/4398	345/93663	-324	-324	119.015
SRX4397587	Pou5f1	iPS cells	3990	1054/4398	189/93663	-324	-324	118.766
SRX13945543	Hif1a	ES cells	1303	317/4398	57/93663	-324	-324	118.44
SRX213813	Supt5	ES cells	15745	2496/4398	450/93663	-324	-324	118.126
SRX031664	Yy1	mESC derived neural cells	4512	809/4398	146/93663	-324	-324	118.007
SRX9195290	Epitope tags	ES cells	12925	2546/4398	460/93663	-324	-324	117.873
SRX3644216	Top2b	ES cells	8135	1328/4398	240/93663	-324	-324	117.842
SRX9195316	Tbp	ES cells	11353	2360/4398	428/93663	-324	-324	117.431
SRX9101841	Kdm2b	ES cells	13382	2200/4398	399/93663	-324	-324	117.426
SRX1670213	Med12	ES cells	4071	733/4398	133/93663	-324	-324	117.372
SRX518335	Nfyc	ES cells	3009	703/4398	128/93663	-324	-324	116.966
SRX5817880	Zic2	ES cells	2637	609/4398	111/93663	-324	-324	116.844
SRX17045820	Epitope tags	ES cells	11124	2483/4398	453/93663	-324	-324	116.732
SRX3602858	Brd4	iPS cells	9224	1281/4398	234/93663	-324	-324	116.586
SRX5371689	Sp1	ES cells	8381	1973/4398	361/93663	-324	-324	116.395
SRX3825599	Hdac1	ES cells	2516	366/4398	67/93663	-324	-324	116.337
SRX4397585	Pou5f1	iPS cells	10438	2876/4398	527/93663	-324	-324	116.223
SRX12622652	Med14	ES cells	8002	1859/4398	341/93663	-324	-324	116.102
SRX5850155	Yy1	ES cells	10975	1101/4398	202/93663	-324	-324	116.078
SRX9195280	Epitope tags	ES cells	12318	2512/4398	461/93663	-324	-324	116.046
SRX16844926	GFP	ES cells	11346	2686/4398	493/93663	-324	-324	116.03
SRX5850150	Yy1	ES cells	9766	1902/4398	350/93663	-324	-324	115.732
SRX10111410	Chd8	ES cells	16816	2678/4398	493/93663	-324	-324	115.685
SRX9450255	Setd1a	ES cells	15698	2842/4398	524/93663	-324	-324	115.506
SRX4397586	Pou5f1	iPS cells	9474	2693/4398	497/93663	-324	-324	115.397
SRX16989256	Nanog	ES cells	9015	1804/4398	333/93663	-324	-324	115.373
SRX13440031	Maz	ES cells	5322	585/4398	108/93663	-324	-324	115.357
SRX13945546	Hif1a	ES cells	1922	444/4398	82/93663	-324	-324	115.314
SRX16844914	GFP	ES cells	11954	2487/4398	460/93663	-324	-324	115.141
SRX13440029	Maz	mESC derived neural cells	11731	2200/4398	407/93663	-324	-324	115.117
SRX3751911	Brd9	ES cells	9562	2378/4398	440/93663	-324	-324	115.099
SRX9101843	Ctnnb1	ES cells	13309	2388/4398	442/93663	-324	-324	115.06
SRX1670189	Med12	ES cells	7111	1372/4398	254/93663	-324	-324	115.036
SRX16989255	Nanog	ES cells	4862	912/4398	169/93663	-324	-324	114.927
SRX10445757	Epitope tags	ES cells	7773	1397/4398	259/93663	-324	-324	114.871
SRX12204168	GFP	ES cells	2623	609/4398	113/93663	-324	-324	114.776
SRX3898499	Med1	ES cells	10050	1864/4398	346/93663	-324	-324	114.731
SRX5850107	Gabpa	ES cells	4841	763/4398	142/93663	-324	-324	114.432
SRX5276471	Myc	ES cells	10069	2031/4398	379/93663	-324	-324	114.126
SRX9596421	Trim28	ES cells	21060	2833/4398	529/93663	-324	-324	114.052
SRX9195289	Epitope tags	ES cells	12018	2509/4398	470/93663	-324	-324	113.688
SRX10783417	Morc3	ES cells	3956	329/4398	62/93663	-324	-324	113.01
SRX14134856	Nelfe	ES cells	13345	2701/4398	510/93663	-324	-324	112.789
SRX9195285	Epitope tags	ES cells	13164	2543/4398	481/93663	-324	-324	112.594
SRX029863	Sin3a	ES cells	4237	806/4398	153/93663	-324	-324	112.191
SRX17045815	Epitope tags	ES cells	12155	2601/4398	494/93663	-324	-324	112.131
SRX9101842	Ctnnb1	ES cells	14043	2253/4398	428/93663	-324	-324	112.106
SRX2545591	Tet3	ES cells	14679	2357/4398	448/93663	-324	-324	112.045
SRX1602657	Kmt2b	ES cells	11022	1519/4398	289/93663	-324	-324	111.937
SRX8737173	Dnmt3b	ES cells	5988	940/4398	179/93663	-324	-324	111.838
SRX9101840	Kdm2b	ES cells	13918	2262/4398	431/93663	-324	-324	111.771
SRX4506777	Brd4	ES cells	12665	2802/4398	537/93663	-324	-324	111.124
SRX9195283	Epitope tags	ES cells	12667	2612/4398	501/93663	-324	-324	111.032
SRX994813	Nrf1	ES cells	8276	1971/4398	379/93663	-324	-324	110.754
SRX9195318	Tbp	ES cells	11053	2390/4398	460/93663	-324	-324	110.65
SRX19838667	Kmt2b	ES cells	14295	2222/4398	428/93663	-324	-324	110.564
SRX2037660	Aff3	ES cells	5365	503/4398	97/93663	-324	-324	110.436
SRX997155	Brd2	ES cells	17010	2136/4398	412/93663	-324	-324	110.412
SRX424007	Kdm4c	ES cells	16351	1794/4398	347/93663	-324	-324	110.105
SRX14134855	Nelfe	ES cells	13504	2705/4398	524/93663	-324	-324	109.938
SRX9195315	Tbp	ES cells	12722	2487/4398	482/93663	-324	-324	109.886
SRX11221953	Taf12	ES cells	14300	2613/4398	507/93663	-324	-324	109.76
SRX11717314	Dpy30	ES cells	9135	1522/4398	296/93663	-324	-324	109.505
SRX15331375	Epitope tags	ES cells	4094	725/4398	141/93663	-324	-324	109.504
SRX868619	Zfp217	ES cells	13905	2852/4398	555/93663	-324	-324	109.438
SRX6071861	Pcgf6	ES cells	7637	1492/4398	291/93663	-324	-324	109.191
SRX13476150	Maz	ES cells	7073	828/4398	162/93663	-324	-324	108.85
SRX657141	Med1	iPS cells	1747	378/4398	74/93663	-324	-324	108.786
SRX17045816	Epitope tags	ES cells	12491	2635/4398	516/93663	-324	-324	108.754
SRX13440032	Maz	ES cells	8816	1485/4398	291/93663	-324	-324	108.679
SRX2830663	Setd1a	ES cells	10985	2673/4398	524/93663	-324	-324	108.638
SRX2754636	Prdm15	ES cells	3237	413/4398	81/93663	-324	-324	108.587
SRX7568553	Dendra2	ES cells	1737	423/4398	83/93663	-324	-324	108.536
SRX8873445	Banp	ES cells	3552	646/4398	127/93663	-324	-324	108.328
SRX5850157	Yy1	ES cells	9363	966/4398	190/93663	-324	-324	108.277
SRX10651088	Pspc1	ES cells	3602	335/4398	66/93663	-324	-324	108.097
SRX997153	Brd2	ES cells	13430	2248/4398	443/93663	-324	-324	108.07
SRX4403318	Mbd3	ES cells	2732	487/4398	96/93663	-324	-324	108.037
SRX1089850	Tbp	Embryoid Bodies	3813	938/4398	185/93663	-324	-324	107.98
SRX19028414	0610010K14Rik	ES cells	11551	1815/4398	358/93663	-324	-324	107.971
SRX12204167	GFP	ES cells	2128	496/4398	98/93663	-324	-324	107.788
SRX7568546	Dendra2	ES cells	3753	941/4398	186/93663	-324	-324	107.743
SRX5850106	Gabpa	ES cells	7112	1011/4398	200/93663	-324	-324	107.655
SRX11417014	GFP	ES cells	11417	2474/4398	490/93663	-324	-324	107.527
SRX12798486	Brd4	ES cells	6814	832/4398	165/93663	-324	-324	107.387
SRX9101864	Kdm2b	ES cells	14050	1769/4398	351/93663	-324	-324	107.333
SRX4167125	Gtf2b	ES cells	16430	3054/4398	607/93663	-324	-324	107.15
SRX16844907	GFP	ES cells	13524	2701/4398	537/93663	-324	-324	107.118
SRX9450265	Chd4	ES cells	2587	367/4398	73/93663	-324	-324	107.067
SRX2523712	Kdm2b	iPS cells	7291	1008/4398	201/93663	-324	-324	106.801
SRX6094544	Kdm2a	ES cells	10345	1071/4398	214/93663	-324	-324	106.583
SRX5850158	Yy1	ES cells	12062	1208/4398	242/93663	-324	-324	106.308
SRX13439139	Xrn2	ES cells	4244	549/4398	110/93663	-324	-324	106.29
SRX12622648	Med14	ES cells	11565	2051/4398	411/93663	-324	-324	106.276
SRX20248711	Trim28	ES cells	24357	1861/4398	373/93663	-324	-324	106.255
SRX12622649	Med14	ES cells	9517	1835/4398	368/93663	-324	-324	106.194
SRX8701266	Mettl3	ES cells	7873	359/4398	72/93663	-324	-324	106.188
SRX1997142	Ep300	ES cells	2583	343/4398	69/93663	-324	-324	105.866
SRX10651089	Pspc1	ES cells	3099	308/4398	62/93663	-324	-324	105.797
SRX3087115	Klf4	ES cells	2493	501/4398	101/93663	-324	-324	105.64
SRX188819	Hcfc1	ES cells	14853	2818/4398	569/93663	-324	-324	105.473
SRX8873448	Banp	ES cells	2510	485/4398	98/93663	-324	-324	105.397
SRX5850152	Yy1	ES cells	7860	841/4398	170/93663	-324	-324	105.356
SRX5850162	Yy1	ES cells	9687	974/4398	197/93663	-324	-324	105.294
SRX2539819	Hdac1	ES cells	13402	1626/4398	329/93663	-324	-324	105.254
SRX4167127	Gtf2b	ES cells	17277	3029/4398	613/93663	-324	-324	105.233
SRX12124760	Yy1	ES cells	9729	1035/4398	210/93663	-324	-324	104.962
SRX1670193	Med12	ES cells	6397	1186/4398	241/93663	-324	-324	104.805
SRX017108	Kdm2a	ES cells	11408	516/4398	105/93663	-324	-324	104.658
SRX3979860	Klf4	ES cells	2607	383/4398	78/93663	-324	-324	104.572
SRX11221903	Med4	ES cells	14023	2793/4398	569/93663	-324	-324	104.537
SRX13945548	Hif1a	ES cells	1738	427/4398	87/93663	-324	-324	104.525
SRX2388540	Biotin	ES cells	10627	2184/4398	446/93663	-324	-324	104.287
SRX022697	Nipbl	ES cells	13693	2507/4398	512/93663	-324	-324	104.279
SRX12735095	Med1	ES cells	15378	2452/4398	501/93663	-324	-324	104.231
SRX12702091	GFP	ES cells	14654	2453/4398	502/93663	-324	-324	104.065
SRX5578683	Biotin	ES cells	10717	1514/4398	310/93663	-324	-324	104.01
SRX16844913	GFP	ES cells	13598	2602/4398	533/93663	-324	-324	103.966
SRX1602644	Men1	ES cells	11108	1908/4398	391/93663	-324	-324	103.924
SRX2545596	Tet3	ES cells	10642	2048/4398	421/93663	-324	-324	103.6
SRX5850118	Max	ES cells	13857	1721/4398	356/93663	-324	-324	102.954
SRX1829032	Aebp2	ES cells	16161	2300/4398	476/93663	-324	-324	102.904
SRX12622647	Med14	ES cells	9722	1796/4398	372/93663	-324	-324	102.82
SRX8873443	Banp	ES cells	3286	642/4398	133/93663	-324	-324	102.801
SRX2441332	Klf4	ES cells	2581	371/4398	77/93663	-324	-324	102.611
SRX6784012	Chd2	ES cells	6243	1030/4398	214/93663	-324	-324	102.503
SRX5850112	Gabpa	ES cells	8659	1486/4398	310/93663	-324	-324	102.087
SRX2353889	Ezh2	mESC derived neural cells	3595	599/4398	125/93663	-324	-324	102.054
SRX11221902	Med4	ES cells	15157	2994/4398	625/93663	-324	-324	102.02
SRX213792	Biotin	ES cells	11214	1263/4398	264/93663	-324	-324	101.885
SRX11221904	Med4	ES cells	14270	2787/4398	584/93663	-324	-324	101.634
SRX5784015	Brd4	ES cells	13646	1030/4398	216/93663	-324	-324	101.554
SRX5850113	Gabpa	ES cells	5305	752/4398	158/93663	-324	-324	101.362
SRX11417005	GFP	ES cells	12038	2560/4398	541/93663	-324	-324	100.776
SRX5624029	Med1	ES cells	4826	752/4398	159/93663	-324	-324	100.724
SRX482878	Rnf2	ES cells	12297	1811/4398	383/93663	-324	-324	100.701
SRX9596422	Trim28	ES cells	23724	2981/4398	633/93663	-324	-324	100.293
SRX9195293	Epitope tags	ES cells	13335	2614/4398	557/93663	-324	-324	99.9455
SRX871223	Tgif2	ES cells	5353	946/4398	202/93663	-324	-324	99.7362
SRX142127	Kat8	ES cells	12106	1503/4398	321/93663	-324	-324	99.7164
SRX5578684	Biotin	ES cells	9861	1388/4398	297/93663	-324	-324	99.5281
SRX021435	Spi1	mESC derived haematopoietic progenitor	2546	355/4398	76/93663	-324	-324	99.4781
SRX5817881	Zic2	ES cells	3806	761/4398	163/93663	-324	-324	99.4283
SRX11221954	Taf12	ES cells	17914	3032/4398	650/93663	-324	-324	99.341
SRX5850114	Gabpa	ES cells	8985	1352/4398	290/93663	-324	-324	99.2868
SRX8832797	Epitope tags	ES cells	14383	1683/4398	361/93663	-324	-324	99.2864
SRX14976491	Yy1	ES cells	1343	303/4398	65/93663	-324	-324	99.2755
SRX1670205	Med12	ES cells	10885	2326/4398	499/93663	-324	-324	99.2709
SRX759626	Pknox1	ES cells	2891	516/4398	111/93663	-324	-324	99.001
SRX9101865	Kdm2b	ES cells	15513	1896/4398	408/93663	-324	-324	98.9671
SRX13945547	Hif1a	ES cells	2349	496/4398	107/93663	-324	-324	98.7213
SRX9450558	Otx2	ES cells	8338	1494/4398	323/93663	-324	-324	98.5056
SRX2793940	Cdk8	ES cells	3171	444/4398	96/93663	-324	-324	98.4974
SRX2831952	Kmt2d	ES cells	13918	2135/4398	462/93663	-324	-324	98.4167
SRX10560004	Med12	ES cells	8898	1365/4398	296/93663	-324	-324	98.2096
SRX14059473	Arid2	ES cells	7009	1042/4398	226/93663	-324	-324	98.1911
SRX3751909	Brd9	ES cells	10746	2400/4398	521/93663	-324	-324	98.1039
SRX19838666	Kmt2b	ES cells	14788	2006/4398	436/93663	-324	-324	97.9845
SRX7669994	Tbp	ES cells	2121	303/4398	66/93663	-324	-324	97.7713
SRX4167120	Med12	ES cells	20161	3103/4398	678/93663	-324	-324	97.4686
SRX1602655	Kmt2b	ES cells	14713	2376/4398	520/93663	-324	-324	97.3097
SRX4167114	Med1	ES cells	12740	2039/4398	447/93663	-324	-324	97.1455
SRX397010	Rnf2	mESC derived neural cells	4279	821/4398	180/93663	-324	-324	97.1367
SRX8994328	Klf4	ES cells	2519	374/4398	82/93663	-324	-324	97.1338
SRX14976533	RFP	ES cells	8112	929/4398	204/93663	-324	-324	96.9836
SRX12142045	Zic2	mESCs, differentiated	8158	1370/4398	301/93663	-324	-324	96.9319
SRX368297	Mcrs1	ES cells	11112	1692/4398	374/93663	-324	-324	96.3478
SRX19028415	0610010K14Rik	ES cells	14490	2250/4398	500/93663	-324	-324	95.8353
SRX3270957	Smarca4	ES cells	5137	729/4398	162/93663	-324	-324	95.8353
SRX1602649	Kmt2b	ES cells	13787	2269/4398	505/93663	-324	-324	95.6877
SRX2793944	Cdk8	ES cells	6819	921/4398	205/93663	-324	-324	95.6794
SRX2236941	Sox2	ES cells	1847	341/4398	76/93663	-324	-324	95.555
SRX994814	Nrf1	ES cells	9419	1944/4398	434/93663	-324	-324	95.3936
SRX9450261	Nelfe	ES cells	18697	2941/4398	657/93663	-324	-324	95.3328
SRX8149298	E2f6	ES cells	5205	781/4398	175/93663	-324	-324	95.0442
SRX7568551	Dendra2	ES cells	6500	1494/4398	335/93663	-324	-324	94.977
SRX091892	Taf3	ES cells	24921	2698/4398	605/93663	-324	-324	94.9728
SRX2793945	Cdk8	ES cells	5226	686/4398	154/93663	-324	-324	94.8672
SRX2404537	Epitope tags	NSC-derived iPS cells	8167	1362/4398	306/93663	-324	-324	94.7913
SRX1519391	Biotin	ES cells	13065	2205/4398	496/93663	-324	-324	94.676
SRX9450557	Otx2	ES cells	11509	1920/4398	432/93663	-324	-324	94.6521
SRX7175335	Yy1	ES cells	11267	861/4398	194/93663	-324	-324	94.5179
SRX6071871	Rnf2	ES cells	12567	2138/4398	482/93663	-324	-324	94.4656
SRX8330923	Utp6	ES cells	11737	1737/4398	393/93663	-324	-324	94.1283
SRX373168	GFP	ES cells	2951	586/4398	133/93663	-324	-324	93.8337
SRX368296	Mcrs1	ES cells	13998	2102/4398	478/93663	-324	-324	93.6521
SRX3141818	Kdm6a	ES cells	5486	949/4398	216/93663	-324	-324	93.5676
SRX9411717	Kdm1a	EpiLC	16716	2027/4398	462/93663	-324	-324	93.4382
SRX825829	Runx1	mESC derived haemogenic endothelium	8209	986/4398	225/93663	-324	-324	93.327
SRX5850154	Yy1	ES cells	12728	1182/4398	270/93663	-324	-324	93.2323
SRX3202006	Tet1	ES cells	11801	963/4398	220/93663	-324	-324	93.2216
SRX2545595	Tet3	ES cells	13793	2604/4398	595/93663	-324	-324	93.2045
SRX14210124	Setd1a	ES cells	11706	2179/4398	498/93663	-324	-324	93.1839
SRX823725	Aff3	ES cells	29141	1901/4398	436/93663	-324	-324	92.8557
SRX378972	Sp1	mESCs, differentiated	14825	2544/4398	584/93663	-324	-324	92.772
SRX11221914	Taf12	ES cells	16897	2908/4398	668/93663	-324	-324	92.7109
SRX214079	Pou5f1	ES cells	10056	1427/4398	328/93663	-324	-324	92.6537
SRX312227	Biotin	ES cells	11321	600/4398	138/93663	-324	-324	92.5945
SRX997156	Brd2	ES cells	17657	2319/4398	534/93663	-324	-324	92.4852
SRX017058	Nelfa	ES cells	17251	2896/4398	667/93663	-324	-324	92.4667
SRX10560005	Med12	ES cells	1840	321/4398	74/93663	-324	-324	92.3817
SRX9450264	Chd4	ES cells	2079	325/4398	75/93663	-324	-324	92.2858
SRX668247	Cdk8	ES cells	4512	869/4398	201/93663	-324	-324	92.0739
SRX5850116	Max	ES cells	13644	1461/4398	338/93663	-324	-324	92.0548
SRX4167135	Med26	ES cells	18180	2942/4398	681/93663	-324	-324	92.0044
SRX11221958	Taf12	ES cells	22239	2965/4398	687/93663	-324	-324	91.9138
SRX022695	Med1	ES cells	15346	2838/4398	658/93663	-324	-324	91.8543
SRX9195311	Med1	ES cells	16297	2871/4398	666/93663	-324	-324	91.8062
SRX11221951	Taf12	ES cells	20126	3103/4398	720/93663	-324	-324	91.783
SRX2545592	Tet3	ES cells	14239	2738/4398	636/93663	-324	-324	91.6831
SRX7568545	Dendra2	ES cells	11108	2091/4398	486/93663	-324	-324	91.6285
SRX4301425	Smarca4	mESC derived cardiac cells	5376	559/4398	130/93663	-324	-324	91.5759
SRX9195302	Tbp	ES cells	14509	2563/4398	597/93663	-324	-324	91.4297
SRX5850108	Gabpa	ES cells	3788	429/4398	100/93663	-324	-324	91.363
SRX4232698	Tet2	ES cells	3376	356/4398	83/93663	-324	-324	91.345
SRX2037659	Aff3	ES cells	6717	733/4398	171/93663	-324	-324	91.2895
SRX11676997	Rpa1	ES cells	13034	2378/4398	555/93663	-324	-324	91.2498
SRX9195314	Tbp	ES cells	15177	2592/4398	605/93663	-324	-324	91.2415
SRX11221952	Taf12	ES cells	20190	3152/4398	736/93663	-324	-324	91.2055
SRX2199823	Rnf2	ES cells	2443	334/4398	78/93663	-324	-324	91.1937
SRX3825670	Mta2	ES cells	5398	753/4398	176/93663	-324	-324	91.1161
SRX4401437	Mta2	ES cells	5398	753/4398	176/93663	-324	-324	91.1161
SRX1602656	Kmt2b	ES cells	17625	2393/4398	560/93663	-324	-324	91.0055
SRX8994329	Klf4	ES cells	2975	444/4398	104/93663	-324	-324	90.9206
SRX13440028	Maz	ES cells	8216	1203/4398	282/93663	-324	-324	90.8509
SRX1670209	Med12	ES cells	10390	1791/4398	420/93663	-324	-324	90.8153
SRX14210093	Setd1a	ES cells	9183	1690/4398	397/93663	-324	-324	90.6586
SRX6071849	Pcgf1	ES cells	12101	2188/4398	514/93663	-324	-324	90.6561
SRX4232697	Tet2	ES cells	15632	2355/4398	554/93663	-324	-324	90.5303
SRX1080403	Smad2	Embryoid Bodies	10303	1541/4398	363/93663	-324	-324	90.4084
SRX8873444	Banp	ES cells	5033	861/4398	203/93663	-324	-324	90.3275
SRX2245718	Brd4	ES cells	14586	2057/4398	485/93663	-324	-324	90.3245
SRX1602651	Kmt2b	ES cells	16769	2587/4398	610/93663	-324	-324	90.3191
SRX2793941	Cdk8	ES cells	7557	986/4398	233/93663	-324	-324	90.1226
SRX2172627	Brd4	iPS cells	17970	2144/4398	507/93663	-324	-324	90.0595
SRX3270968	Smarca4	ES cells	3364	485/4398	115/93663	-324	-324	89.8166
SRX11386272	Kdm6a	ES cells	10873	1551/4398	368/93663	-324	-324	89.7588
SRX2388542	Biotin	ES cells	18151	2837/4398	674/93663	-324	-324	89.6422
SRX482879	Rnf2	ES cells	16990	2283/4398	544/93663	-324	-324	89.3758
SRX11417015	GFP	ES cells	14770	3019/4398	720/93663	-324	-324	89.2984
SRX5850109	Gabpa	ES cells	6885	884/4398	211/93663	-324	-324	89.2242
SRX1670181	Med12	ES cells	8525	1457/4398	349/93663	-324	-324	88.9093
SRX2404540	Epitope tags	NSC-derived iPS cells	10754	1907/4398	457/93663	-324	-324	88.8684
SRX994829	Rnf2	mESC derived cardiac cells	3568	463/4398	111/93663	-324	-324	88.8323
SRX5817868	Zic2	ES cells	6314	1088/4398	261/93663	-324	-324	88.7772
SRX2236942	Sox2	ES cells	2592	479/4398	115/93663	-324	-324	88.7055
SRX994830	Rybp	mESC derived cardiac cells	2555	308/4398	74/93663	-324	-324	88.6404
SRX9195292	Epitope tags	ES cells	15753	2790/4398	671/93663	-324	-324	88.5512
SRX7175336	Yy1	ES cells	10911	842/4398	203/93663	-324	-324	88.3342
SRX8994326	Klf4	ES cells	2436	344/4398	83/93663	-324	-324	88.2659
SRX10978091	Banp	ES cells	10240	1693/4398	409/93663	-324	-324	88.1549
SRX1280434	Nrf1	ES cells	11785	2121/4398	513/93663	-324	-324	88.0514
SRX5371688	Sp1	ES cells	12558	2505/4398	607/93663	-324	-324	87.8885
SRX6639876	Setd1a	ES cells	16404	2868/4398	695/93663	-324	-324	87.8835
SRX5251388	Smad4	ES cells	2793	392/4398	95/93663	-324	-324	87.877
SRX026255	Smad3	ES cells	4094	565/4398	137/93663	-324	-324	87.8296
SRX1670185	Med12	ES cells	7585	1076/4398	261/93663	-324	-324	87.798
SRX6071856	Pcgf6	ES cells	4619	659/4398	160/93663	-324	-324	87.7159
SRX8873447	Banp	ES cells	3726	630/4398	153/93663	-324	-324	87.6924
SRX12622651	Med14	ES cells	14703	2691/4398	655/93663	-324	-324	87.4954
SRX5850124	Max	ES cells	16070	1811/4398	441/93663	-324	-324	87.4566
SRX115144	Biotin	ES cells	3003	349/4398	85/93663	-324	-324	87.4419
SRX12798485	Brd4	ES cells	14667	2022/4398	493/93663	-324	-324	87.3468
SRX16989257	Tbp	ES cells	16116	2358/4398	575/93663	-324	-324	87.3351
SRX9195303	Tbp	ES cells	15660	2685/4398	655/93663	-324	-324	87.3003
SRX12197069	Nrf1	ES cells	6622	1820/4398	444/93663	-324	-324	87.2974
SRX5371690	Sp1	ES cells	12003	2484/4398	606/93663	-324	-324	87.2955
SRX9187064	Epitope tags	ES cells	6700	1467/4398	358/93663	-324	-324	87.269
SRX209326	Sox2	mESCs, differentiated	2752	356/4398	87/93663	-324	-324	87.1452
SRX1688323	Gtf3c1	ES cells	17657	2618/4398	640/93663	-324	-324	87.1169
SRX695697	Chd4	ES cells	2449	319/4398	78/93663	-324	-324	87.0981
SRX4167119	Med12	ES cells	22804	3213/4398	787/93663	-324	-324	86.9458
SRX5371698	Sp1	ES cells	13909	2966/4398	729/93663	-324	-324	86.6476
SRX9195313	Tbp	ES cells	15340	2673/4398	657/93663	-324	-324	86.6456
SRX1177004	Brd4	ES cells	4403	606/4398	149/93663	-324	-324	86.6162
SRX047138	Hdac2	ES cells	3607	500/4398	123/93663	-324	-324	86.5721
SRX1741141	Fam60a	ES cells	10079	1771/4398	436/93663	-324	-324	86.5057
SRX2404538	Epitope tags	NSC-derived iPS cells	11960	2123/4398	523/93663	-324	-324	86.4492
SRX15652645	Nipbl	ES cells	4470	649/4398	160/93663	-324	-324	86.3848
SRX5027348	Pcgf6	ES cells	3326	531/4398	131/93663	-324	-324	86.3249
SRX14210153	Setd1a	ES cells	8149	1471/4398	363/93663	-324	-324	86.3016
SRX1845478	Epitope tags	ES cells	6488	627/4398	155/93663	-324	-324	86.1487
SRX2609735	Med1	ES cells	16824	2463/4398	609/93663	-324	-324	86.1311
SRX3202007	Tet1	ES cells	15082	1209/4398	299/93663	-324	-324	86.1128
SRX6422750	Pcgf6	ES cells	3759	505/4398	125/93663	-324	-324	86.0388
SRX2612038	Ss18	ES cells	2468	307/4398	76/93663	-324	-324	86.0276
SRX8873446	Banp	ES cells	4515	738/4398	183/93663	-324	-324	85.8852
SRX10157271	Banp	mESC derived neural cells	16275	3016/4398	748/93663	-324	-324	85.8702
SRX14210168	Setd1a	ES cells	7609	1338/4398	332/93663	-324	-324	85.8284
SRX5247619	Zbtb11	ES cells	7422	991/4398	246/93663	-324	-324	85.7929
SRX12197081	Nrf1	mESC derived neural cells	14777	2814/4398	699/93663	-324	-324	85.7353
SRX3176051	Epitope tags	ES cells	13267	1584/4398	394/93663	-324	-324	85.6193
SRX6073530	Nipbl	P19	17075	1745/4398	435/93663	-324	-324	85.4317
SRX5088233	Pml	ES cells	18216	1170/4398	292/93663	-324	-324	85.3328
SRX11221879	Med1	ES cells	18012	3026/4398	756/93663	-324	-324	85.2432
SRX7568552	Dendra2	ES cells	11665	2147/4398	537/93663	-324	-324	85.1472
SRX1688327	Gtf3c1	ES cells	17565	2600/4398	651/93663	-324	-324	85.056
SRX1670201	Med12	ES cells	14175	2755/4398	690/93663	-324	-324	85.0326
SRX15652647	Nipbl	ES cells	12180	1948/4398	489/93663	-324	-324	84.8385
SRX9450505	Med1	ES cells	2735	330/4398	83/93663	-324	-324	84.6737
SRX10560006	Med12	ES cells	14546	1674/4398	422/93663	-324	-324	84.4804
SRX823724	Aff3	ES cells	19582	1313/4398	332/93663	-324	-324	84.2247
SRX5247638	Zbtb11	ES cells	10511	1078/4398	273/93663	-324	-324	84.0948
SRX3272101	Rybp	Embryoid Bodies	8641	1091/4398	277/93663	-324	-324	83.8799
SRX5850110	Gabpa	ES cells	8404	1015/4398	258/93663	-324	-324	83.7836
SRX381487	Rnf2	ES cells	8930	1113/4398	283/93663	-324	-324	83.7571
SRX1659049	Ep300	mESC derived neural cells	16186	2603/4398	666/93663	-324	-324	83.2363
SRX11237539	Yy1	ES cells	9075	1082/4398	277/93663	-324	-324	83.1879
SRX6071872	Rnf2	ES cells	15560	2424/4398	622/93663	-324	-324	82.9956
SRX19935222	Epitope tags	ES cells	2437	370/4398	95/93663	-324	-324	82.9451
SRX6768043	Rnf2	ES cells	6615	777/4398	200/93663	-324	-324	82.7378
SRX310330	Rnf2	ES cells	4064	427/4398	110/93663	-324	-324	82.67
SRX2440054	Grhl2	EpiSC	2792	388/4398	100/93663	-324	-324	82.6313
SRX12197087	Nrf1	mESC derived neural cells	15268	2861/4398	738/93663	-324	-324	82.5609
SRX1080406	Smad2	Embryoid Bodies	12564	1765/4398	456/93663	-324	-324	82.4314
SRX7568544	Dendra2	ES cells	12810	2307/4398	597/93663	-324	-324	82.2974
SRX11188233	Mphosph8	ES cells	2457	305/4398	79/93663	-324	-324	82.2215
SRX657154	Med1	ES cells	4927	880/4398	228/93663	-324	-324	82.1979
SRX11221957	Taf12	ES cells	24862	3108/4398	806/93663	-324	-324	82.1219
SRX5401516	Yy1	ES cells	9902	1226/4398	318/93663	-324	-324	82.1062
SRX8198564	Suz12	ES cells	5293	724/4398	188/93663	-324	-324	82.0151
SRX9195286	Epitope tags	ES cells	16148	2811/4398	731/93663	-324	-324	81.8948
SRX11221933	Taf12	ES cells	18205	3132/4398	816/93663	-324	-324	81.7418
SRX10978090	Banp	ES cells	12371	1953/4398	509/93663	-324	-324	81.7142
SRX12735094	Med1	ES cells	19221	2992/4398	780/93663	-324	-324	81.6921
SRX6768047	Rnf2	ES cells	7623	932/4398	243/93663	-324	-324	81.6813
SRX5817867	Zic2	ES cells	7522	1207/4398	315/93663	-324	-324	81.6036
SRX4506780	Brd4	ES cells	17197	3049/4398	796/93663	-324	-324	81.575
SRX1688321	Ncaph2	ES cells	17152	2843/4398	743/93663	-324	-324	81.4894
SRX2441334	Klf4	ES cells	8184	1282/4398	336/93663	-324	-324	81.2572
SRX9450295	Epitope tags	ES cells	9262	1213/4398	318/93663	-324	-324	81.2356
SRX9187060	Epitope tags	ES cells	7230	659/4398	173/93663	-324	-324	81.1245
SRX2236936	Pou5f1	ES cells	2127	365/4398	96/93663	-324	-324	80.9719
SRX12622658	Med14	ES cells	11723	2119/4398	558/93663	-324	-324	80.8741
SRX19028408	Taf1	ES cells	15779	3110/4398	819/93663	-324	-324	80.8704
SRX9450257	Nelfe	ES cells	21342	3102/4398	817/93663	-324	-324	80.8598
SRX3825672	Mta2	ES cells	3821	466/4398	123/93663	-324	-324	80.6852
SRX4401439	Mta2	ES cells	3821	466/4398	123/93663	-324	-324	80.6852
SRX236482	Cdk8	ES cells	11820	1969/4398	520/93663	-324	-324	80.6409
SRX5371702	Sp3	ES cells	14300	2952/4398	780/93663	-324	-324	80.5999
SRX5251386	Smad2	ES cells	12865	1985/4398	525/93663	-324	-324	80.5219
SRX19028406	Taf1	ES cells	16206	3064/4398	811/93663	-324	-324	80.4601
SRX18040246	Sox2	ES cells	1957	351/4398	93/93663	-324	-324	80.378
SRX11221901	Med4	ES cells	18716	3341/4398	886/93663	-324	-324	80.3074
SRX3979862	Klf4	ES cells	8179	1280/4398	340/93663	-324	-324	80.1759
SRX5251398	Foxh1	Embryoid Bodies	21221	3326/4398	884/93663	-324	-324	80.1277
SRX2415037	Mettl3	ES cells	1890	380/4398	101/93663	-324	-324	80.1263
SRX19028407	Taf1	ES cells	15381	2904/4398	772/93663	-324	-324	80.111
SRX7685626	Rad21	ES cells	15874	2301/4398	612/93663	-324	-324	80.0715
SRX5371704	Sp3	ES cells	15080	3046/4398	811/93663	-324	-324	79.9875
SRX319553	Kat5	ES cells	17969	1903/4398	507/93663	-324	-324	79.9362
SRX4403324	Mbd3	ES cells	7054	918/4398	245/93663	-324	-324	79.7975
SRX12798080	Smarca4	ES cells	17301	1805/4398	482/93663	-324	-324	79.7523
SRX9858288	Ep300	ES cells	5767	951/4398	254/93663	-324	-324	79.737
SRX234787	Cbx3	iPS cells	11764	1789/4398	478/93663	-324	-324	79.7068
DRX013314	Kdm1a	EpiSC	19216	1753/4398	469/93663	-324	-324	79.6016
SRX5379469	Prdm15	ES cells	6636	829/4398	222/93663	-324	-324	79.527
SRX6639878	Setd1a	ES cells	13427	2098/4398	562/93663	-324	-324	79.5027
SRX997159	Brd2	ES cells	20053	2071/4398	555/93663	-324	-324	79.4694
SRX3202005	Tet1	ES cells	14587	1149/4398	308/93663	-324	-324	79.4479
SRX4167117	Med12	ES cells	25593	3320/4398	890/93663	-324	-324	79.444
SRX5401517	Yy1	ES cells	10420	1311/4398	352/93663	-324	-324	79.3182
SRX15057957	Zic2	mESCs, differentiated	19158	2666/4398	716/93663	-324	-324	79.2976
SRX5817882	Zic2	ES cells	10600	1597/4398	429/93663	-324	-324	79.2794
SRX1639485	Epop	ES cells	17091	2192/4398	589/93663	-324	-324	79.2571
SRX8736786	Kmt2d	mESC derived neural cells	12903	1667/4398	448/93663	-324	-324	79.2447
SRX11123496	Sox2	ES cells	2150	305/4398	82/93663	-324	-324	79.2134
SRX1602648	Kmt2b	ES cells	17597	2684/4398	722/93663	-324	-324	79.1695
SRX404306	Tfap2c	ZHBTc4	4083	490/4398	132/93663	-324	-324	79.056
SRX15652598	Nipbl	ES cells	3733	471/4398	127/93663	-324	-324	78.9823
SRX3202004	Tet1	ES cells	24590	2294/4398	620/93663	-324	-324	78.7979
SRX214080	Pou5f1	ES cells	24450	2654/4398	718/93663	-324	-324	78.7208
SRX13945545	Hif1a	ES cells	7679	1494/4398	405/93663	-324	-324	78.5613
SRX2236914	Sox2	ES cells	3397	450/4398	122/93663	-324	-324	78.5535
SRX11417002	GFP	ES cells	17768	3073/4398	834/93663	-324	-324	78.471
SRX16844895	GFP	ES cells	14801	3060/4398	833/93663	-324	-324	78.2329
SRX6071858	Pcgf6	ES cells	5328	764/4398	208/93663	-324	-324	78.2245
SRX823605	Chd4	ES cells	3483	455/4398	124/93663	-324	-324	78.1452
SRX9187065	Epitope tags	ES cells	8590	1757/4398	479/93663	-324	-324	78.1176
SRX2458510	Epitope tags	ES cells	5545	575/4398	157/93663	-324	-324	77.9976
SRX8736743	Kmt2d	mESC derived neural cells	12015	1552/4398	424/93663	-324	-324	77.9541
SRX6094550	Kdm2b	ES cells	7736	1017/4398	278/93663	-324	-324	77.9092
SRX823726	Aff3	ES cells	10482	958/4398	262/93663	-324	-324	77.8712
SRX029861	Tet1	ES cells	8592	1011/4398	277/93663	-324	-324	77.7292
SRX9187040	Epitope tags	ES cells	5892	466/4398	128/93663	-324	-324	77.5334
SRX9195279	Epitope tags	ES cells	17168	2987/4398	822/93663	-324	-324	77.3885
SRX4159294	Epitope tags	F9	9642	980/4398	270/93663	-324	-324	77.2992
SRX2236915	Sox2	ES cells	3574	421/4398	116/93663	-324	-324	77.2924
SRX159136	Zfp143	ES cells	6133	732/4398	202/93663	-324	-324	77.1743
SRX1668835	Isl1	mESC derived cardiac cells	2593	362/4398	100/93663	-324	-324	77.0941
SRX10978089	Banp	ES cells	13583	2063/4398	570/93663	-324	-324	77.0792
SRX13332961	Kmt2d	ES cells	5458	325/4398	90/93663	-324	-324	76.9048
SRX6071857	Pcgf6	ES cells	5512	772/4398	214/93663	-324	-324	76.8274
SRX1280435	Nrf1	ES cells	15879	2585/4398	718/93663	-324	-324	76.6741
SRX5371705	Sp3	ES cells	15222	3070/4398	855/93663	-324	-324	76.4689
SRX360386	Kmt2d	ES cells	2255	362/4398	101/93663	-324	-324	76.3308
SRX482054	Tdg	ES cells	18857	2333/4398	651/93663	-324	-324	76.3214
SRX5371703	Sp3	ES cells	14743	3073/4398	858/93663	-324	-324	76.276
SRX9450502	Med1	ES cells	4406	512/4398	143/93663	-324	-324	76.2512
SRX16989248	Pou5f1	ES cells	6533	830/4398	232/93663	-324	-324	76.1909
SRX477545	Tgif1	ES cells	12479	1627/4398	455/93663	-324	-324	76.1533
SRX20022554	Epitope tags	ES cells	17759	2599/4398	727/93663	-324	-324	76.1351
SRX9195310	Med1	ES cells	21849	3210/4398	899/93663	-324	-324	76.0428
SRX11221947	Taf1	ES cells	19018	2960/4398	829/93663	-324	-324	76.0414
SRX16844923	GFP	ES cells	16688	3142/4398	882/93663	-324	-324	75.8666
SRX022692	Med12	ES cells	18862	2991/4398	841/93663	-324	-324	75.7414
SRX4167134	Taf2	ES cells	26689	2959/4398	834/93663	-324	-324	75.56
SRX191070	Epitope tags	ES cells	27745	2471/4398	699/93663	-324	-324	75.285
SRX1743241	Kdm4a	ES cells	8445	512/4398	145/93663	-324	-324	75.1995
SRX5850120	Max	ES cells	20786	2173/4398	616/93663	-324	-324	75.1263
SRX16844897	GFP	ES cells	17198	3178/4398	901/93663	-324	-324	75.1176
SRX1590979	Tet2	ES cells	2186	328/4398	93/93663	-324	-324	75.111
SRX5850111	Gabpa	ES cells	5311	578/4398	164/93663	-324	-324	75.058
SRX4167118	Med12	ES cells	27643	3363/4398	956/93663	-324	-324	74.9172
SRX708729	Nkx2-2	mESC derived neural cells	4046	411/4398	117/93663	-324	-324	74.8116
SRX4301434	Smarca4	mESC derived cardiac cells	16273	2202/4398	627/93663	-324	-324	74.7933
SRX10157270	Banp	mESC derived neural cells	18394	3108/4398	885/93663	-324	-324	74.7912
SRX657145	Med1	iPS cells	12261	930/4398	265/93663	-324	-324	74.7395
SRX16844894	GFP	ES cells	15900	3115/4398	888/93663	-324	-324	74.7064
SRX4232699	Tet2	ES cells	13571	1128/4398	322/93663	-324	-324	74.6047
SRX5817870	Zic2	ES cells	7753	1222/4398	349/93663	-324	-324	74.5691
SRX2423275	GFP	ES cells	2470	378/4398	108/93663	-324	-324	74.5385
SRX6078354	Crebbp	ES cells	20017	2289/4398	654/93663	-324	-324	74.5385
SRX1602652	Kmt2b	ES cells	19945	2861/4398	819/93663	-324	-324	74.3955
SRX6094549	Kdm2b	ES cells	8362	1177/4398	337/93663	-324	-324	74.3806
SRX2486173	Epitope tags	ES cells	18980	3289/4398	942/93663	-324	-324	74.3577
SRX5850126	Max	ES cells	22499	2453/4398	703/93663	-324	-324	74.3113
SRX262848	Rbpj	F9	3292	442/4398	127/93663	-324	-324	74.1193
SRX12142050	Zic2	mESCs, differentiated	7647	1021/4398	294/93663	-324	-324	73.959
SRX5401532	Yy1	ES cells	10123	1139/4398	328/93663	-324	-324	73.9542
SRX4167136	Med26	ES cells	22780	3164/4398	913/93663	-324	-324	73.8038
SRX13440030	Maz	mESC derived neural cells	18724	2687/4398	777/93663	-324	-324	73.6478
SRX7433227	Nanog	ES cells	2530	368/4398	107/93663	-324	-324	73.2448
SRX095342	Yy1	ES cells	14012	1681/4398	489/93663	-324	-324	73.2102
SRX2441337	Klf4	ES cells	14543	2075/4398	604/93663	-324	-324	73.1634
SRX5729493	Twist1	Embryoid Bodies	8000	601/4398	175/93663	-324	-324	73.139
SRX16844887	GFP	ES cells	16621	3014/4398	878/93663	-324	-324	73.1074
SRX1824751	Pbx1	P19	4911	357/4398	104/93663	-324	-324	73.1051
SRX5247633	Epitope tags	ES cells	10734	923/4398	269/93663	-324	-324	73.0739
SRX4338265	Suz12	ES cells	4395	391/4398	114/93663	-324	-324	73.044
SRX1831954	Rnf2	ES cells	9578	1200/4398	350/93663	-324	-324	73.0173
SRX128354	Zfp42	ES cells	29909	2317/4398	676/93663	-324	-324	72.9948
SRX14663239	GFP	ES cells	16996	2264/4398	661/93663	-324	-324	72.9437
SRX2388541	Biotin	ES cells	4728	500/4398	146/93663	-324	-324	72.934
SRX9450256	Nelfe	ES cells	23272	3153/4398	921/93663	-324	-324	72.9083
SRX381478	Kdm2b	ES cells	14705	1771/4398	518/93663	-324	-324	72.8118
SRX16989239	Pou5f1	ES cells	9334	1154/4398	338/93663	-324	-324	72.7113
SRX3202002	Tet1	ES cells	26463	2369/4398	695/93663	-324	-324	72.5927
SRX2831973	Kmt2d	ES cells	14532	1859/4398	547/93663	-324	-324	72.3777
SRX11221932	Taf12	ES cells	20590	3246/4398	957/93663	-324	-324	72.2353
SRX7529879	Rnf2	ES cells	6911	641/4398	189/93663	-324	-324	72.2286
SRX319555	Nr0b1	ES cells	13599	1688/4398	499/93663	-324	-324	72.0418
SRX14663240	GFP	ES cells	16378	2202/4398	651/93663	-324	-324	72.0359
SRX6768046	Rnf2	ES cells	10867	1400/4398	414/93663	-324	-324	72.0179
SRX11221940	Taf12	ES cells	19699	3299/4398	977/93663	-324	-324	71.9119
SRX7568532	Dendra2	ES cells	1743	344/4398	102/93663	-324	-324	71.8243
SRX529398	Sox3	mESC derived neural cells	3399	337/4398	100/93663	-324	-324	71.77
SRX6094551	Kdm2b	ES cells	10384	1322/4398	393/93663	-324	-324	71.6394
SRX2404536	Sin3a	NSC-derived iPS cells	14893	2838/4398	844/93663	-324	-324	71.6115
SRX9641217	Sox2	EpiLC	5225	568/4398	169/93663	-324	-324	71.5772
SRX18520802	Tbp	ES cells	17893	2004/4398	597/93663	-324	-324	71.4885
SRX1036420	Hexim1	ES cells	26603	2758/4398	826/93663	-324	-324	71.1094
SRX15652599	Nipbl	ES cells	3788	497/4398	149/93663	-324	-324	71.0367
SRX19028393	Epitope tags	ES cells	20615	3051/4398	917/93663	-324	-324	70.8575
SRX2612039	Ss18	ES cells	3722	369/4398	111/93663	-324	-324	70.7972
SRX6078357	Ep300	ES cells	21055	2303/4398	693/93663	-324	-324	70.774
SRX1372667	Rnf2	ES cells	7267	727/4398	219/93663	-324	-324	70.6973
SRX3038043	Pou5f1	iPS cells	13628	800/4398	241/93663	-324	-324	70.6945
SRX5401533	Yy1	ES cells	11219	1287/4398	388/93663	-324	-324	70.6415
SRX2754633	Prdm15	ES cells	32153	2483/4398	750/93663	-324	-324	70.5064
SRX994810	Nrf1	ES cells	14117	1955/4398	592/93663	-324	-324	70.3296
SRX4232696	Tet2	ES cells	22905	2828/4398	858/93663	-324	-324	70.1948
SRX5850121	Max	ES cells	21536	2289/4398	695/93663	-324	-324	70.1413
SRX11237500	Rad21	ES cells	2026	326/4398	99/93663	-324	-324	70.1286
SRX191071	Epitope tags	ES cells	22540	1964/4398	597/93663	-324	-324	70.0616
SRX3202003	Tet1	ES cells	26177	2329/4398	708/93663	-324	-324	70.0566
SRX6768042	Rnf2	ES cells	11446	1516/4398	461/93663	-324	-324	70.0344
SRX19028409	Taf1	ES cells	18771	3280/4398	1000/93663	-324	-324	69.8533
SRX4167113	Med1	ES cells	24120	3040/4398	927/93663	-324	-324	69.8404
SRX381479	Kdm2b	ES cells	14655	1667/4398	509/93663	-324	-324	69.7478
SRX9858289	Ep300	ES cells	6676	1084/4398	331/93663	-324	-324	69.7452
SRX9410192	GFP	ES cells	14913	1718/4398	525/93663	-324	-324	69.691
SRX236483	Cdk9	ES cells	10339	1544/4398	472/93663	-324	-324	69.6656
SRX7845382	Ep300	ES cells	3892	314/4398	96/93663	-324	-324	69.658
SRX5371696	Sp3	ES cells	17988	3025/4398	928/93663	-324	-324	69.4209
SRX209313	Sox2	mESC derived neural cells	7837	804/4398	247/93663	-324	-324	69.3221
SRX16101718	Smarca4	ES cells	4964	553/4398	170/93663	-324	-324	69.277
SRX334974	Klf4	ES cells	6568	754/4398	232/93663	-324	-324	69.2144
SRX6422749	Pcgf6	ES cells	4460	425/4398	131/93663	-324	-324	69.0924
SRX16844901	GFP	ES cells	18951	3072/4398	947/93663	-324	-324	69.085
SRX9450294	Epitope tags	ES cells	16943	2032/4398	629/93663	-324	-324	68.7996
SRX5926388	Med1	ES cells	23727	3372/4398	1044/93663	-324	-324	68.786
SRX4397584	Pou5f1	iPS cells	27397	3202/4398	994/93663	-324	-324	68.6037
SRX520224	Arid3a	ES cells	6237	685/4398	213/93663	-324	-324	68.4895
SRX186547	Rnf2	ES cells	19989	1929/4398	601/93663	-324	-324	68.355
SRX1372672	Rnf2	mESC derived neural cells	4356	475/4398	148/93663	-324	-324	68.351
SRX9411720	Kmt2d	EpiLC	20661	1625/4398	507/93663	-324	-324	68.2587
SRX5926389	Med1	ES cells	22162	3285/4398	1025/93663	-324	-324	68.2534
SRX994811	Nrf1	ES cells	17535	2231/4398	698/93663	-324	-324	68.0702
SRX5371694	Sp3	ES cells	18741	2963/4398	932/93663	-324	-324	67.7062
SRX657151	Med1	iPS cells	13639	752/4398	237/93663	-324	-324	67.5744
SRX15652646	Nipbl	ES cells	14759	1881/4398	593/93663	-324	-324	67.5534
SRX1831956	Rnf2	ES cells	9815	1240/4398	391/93663	-324	-324	67.5395
SRX6071848	Pcgf1	ES cells	14297	2185/4398	689/93663	-324	-324	67.5375
SRX7546913	Zic3	ES cells	4341	693/4398	219/93663	-324	-324	67.391
SRX7175340	Yy1	ES cells	14235	1156/4398	366/93663	-324	-324	67.2651
SRX7653551	Yap1	ES cells	6004	445/4398	141/93663	-324	-324	67.2131
SRX11237501	Smc1a	ES cells	13272	1270/4398	403/93663	-324	-324	67.1138
SRX16844912	GFP	ES cells	19306	2987/4398	950/93663	-324	-324	66.9614
SRX9195312	Tbp	ES cells	23652	2943/4398	937/93663	-324	-324	66.8904
SRX764229	Epitope tags	ES cells	4566	445/4398	142/93663	-324	-324	66.7397
SRX16844896	GFP	ES cells	19333	3298/4398	1053/93663	-324	-324	66.7014
SRX2762152	Setd1a	ES cells	17865	3177/4398	1017/93663	-324	-324	66.5287
SRX6071847	Pcgf1	ES cells	16862	2728/4398	874/93663	-324	-324	66.4731
SRX330668	Ezh2	ES cells	12455	1241/4398	398/93663	-324	-324	66.4051
SRX14595108	Fev	Embryoid Bodies	12589	1647/4398	529/93663	-324	-324	66.3057
SRX191946	Gata4	ES cells	11028	1236/4398	397/93663	-324	-324	66.3042
SRX3272100	Rybp	Embryoid Bodies	4360	401/4398	129/93663	-324	-324	66.2014
SRX5817869	Zic2	ES cells	11917	1607/4398	517/93663	-324	-324	66.197
SRX2441333	Klf4	ES cells	11394	1280/4398	412/93663	-324	-324	66.1646
SRX3200443	Fli1	mESC derived haemogenic endothelium	6661	807/4398	260/93663	-324	-324	66.1018
SRX381488	Rnf2	ES cells	8590	784/4398	253/93663	-324	-324	65.9946
SRX1089849	Tbp	ES cells	13436	1931/4398	624/93663	-324	-324	65.9038
SRX16844919	GFP	ES cells	18655	3204/4398	1036/93663	-324	-324	65.8636
SRX5360258	Isl1	mESC derived cardiac cells	59070	1524/4398	495/93663	-324	-324	65.5681
SRX19935223	Myc	ES cells	5833	801/4398	261/93663	-324	-324	65.3589
SRX3979861	Klf4	ES cells	11952	1347/4398	439/93663	-324	-324	65.3455
SRX2236908	Pou5f1	ES cells	3426	334/4398	109/93663	-324	-324	65.2579
SRX1471489	Ep300	ES cells	4348	398/4398	130/93663	-324	-324	65.2007
SRX5850115	Max	ES cells	22556	2188/4398	717/93663	-324	-324	64.9892
SRX11123499	Sox2	ES cells	3521	457/4398	150/93663	-324	-324	64.884
SRX977380	Pou5f1	iPS cells	23740	2716/4398	892/93663	-324	-324	64.8452
SRX039347	Tet1	ES cells	19830	2244/4398	737/93663	-324	-324	64.8438
SRX2236939	Sox2	ES cells	3261	415/4398	137/93663	-324	-324	64.512
SRX11221949	Taf12	ES cells	25698	3491/4398	1153/93663	-324	-324	64.4812
SRX17793746	Myc	ES cells	5478	787/4398	260/93663	-324	-324	64.4636
SRX16844903	GFP	ES cells	19656	3176/4398	1050/93663	-324	-324	64.4175
SRX2754632	Prdm15	ES cells	33212	2522/4398	835/93663	-324	-324	64.3238
SRX657153	Med1	ES cells	14447	2364/4398	783/93663	-324	-324	64.2982
SRX6071845	Pcgf1	ES cells	11071	1479/4398	490/93663	-324	-324	64.2813
SRX468970	Klf5	ES cells	17044	1846/4398	612/93663	-324	-324	64.2382
SRX14595109	Fev	Embryoid Bodies	9363	1053/4398	350/93663	-324	-324	64.0727
SRX2404539	Epitope tags	NSC-derived iPS cells	12684	1510/4398	502/93663	-324	-324	64.0599
SRX1036419	Ddx21	ES cells	26932	3193/4398	1064/93663	-324	-324	63.9102
SRX9637872	Foxk2	ES cells	6039	981/4398	327/93663	-324	-324	63.8902
SRX7175339	Yy1	ES cells	14509	1151/4398	384/93663	-324	-324	63.8347
SRX1539903	Rnf2	ES cells	7137	575/4398	192/93663	-324	-324	63.7793
SRX5401530	Yy1	ES cells	13491	1462/4398	489/93663	-324	-324	63.6724
SRX16844900	GFP	ES cells	20658	3178/4398	1063/93663	-324	-324	63.6698
SRX5850122	Max	ES cells	27424	2589/4398	866/93663	-324	-324	63.6688
SRX16844884	GFP	ES cells	18871	3160/4398	1057/93663	-324	-324	63.6685
SRX6768045	Rnf2	ES cells	7976	916/4398	307/93663	-324	-324	63.5433
SRX2831998	Kmt2d	ES cells	17235	2154/4398	722/93663	-324	-324	63.5362
SRX9195317	Tbp	ES cells	25924	3016/4398	1014/93663	-324	-324	63.3441
SRX2236937	Pou5f1	ES cells	2995	422/4398	142/93663	-324	-324	63.2903
SRX4167115	Med1	ES cells	27402	3209/4398	1080/93663	-324	-324	63.2789
SRX149638	Brd4	ES cells	15026	2255/4398	760/93663	-324	-324	63.1896
SRX9450267	Chd4	ES cells	9332	1047/4398	353/93663	-324	-324	63.1662
SRX16844906	GFP	ES cells	20181	3045/4398	1029/93663	-324	-324	63.0209
SRX16101719	Smarca4	ES cells	3629	412/4398	140/93663	-324	-324	62.6732
SRX2498435	Epitope tags	ES cells	22876	2696/4398	917/93663	-324	-324	62.6128
SRX381480	Kdm2b	ES cells	15362	1545/4398	526/93663	-324	-324	62.5541
SRX4232701	Epitope tags	ES cells	19359	1825/4398	622/93663	-324	-324	62.4864
SRX4403319	Chd4	ES cells	3788	375/4398	128/93663	-324	-324	62.3928
SRX3020600	Wdr11	ES cells	4352	740/4398	253/93663	-324	-324	62.2908
SRX14663242	GFP	ES cells	17625	2156/4398	738/93663	-324	-324	62.2165
SRX5388086	Trim28	ES cells	14700	1285/4398	440/93663	-324	-324	62.1961
SRX9858291	Ep300	ES cells	12049	1693/4398	580/93663	-324	-324	62.1644
SRX1035387	Fli1	mESC derived haematopoietic progenitor	3971	391/4398	134/93663	-324	-324	62.1419
SRX8042397	Rybp	ES cells	9388	1027/4398	352/93663	-324	-324	62.1356
SRX477546	Hdac1	ES cells	8465	1044/4398	359/93663	-324	-324	61.9325
SRX2523722	Kdm2b	iPS cells	10843	904/4398	311/93663	-324	-324	61.9043
SRX11417001	GFP	ES cells	21386	3250/4398	1119/93663	-324	-324	61.8538
SRX19028410	Taf3	ES cells	24923	3264/4398	1124/93663	-324	-324	61.8439
SRX5251397	Foxh1	Embryoid Bodies	25926	3498/4398	1205/93663	-324	-324	61.8224
SRX10629544	Brd4	ES cells	6122	610/4398	211/93663	-324	-324	61.5687
SRX6768062	Rnf2	ES cells	6127	618/4398	214/93663	-324	-324	61.5018
SRX10157269	Banp	ES cells	23367	3032/4398	1053/93663	-324	-324	61.3216
SRX4578585	Smad2	ES cells	24672	3105/4398	1081/93663	-324	-324	61.1714
DRX013326	Kdm1a	EpiSC	42811	2804/4398	978/93663	-324	-324	61.0593
SRX3038051	Sox2	iPS cells	10663	616/4398	215/93663	-324	-324	61.0176
SRX13439135	Tbp	ES cells	18784	3096/4398	1082/93663	-324	-324	60.9378
SRX9450263	Chd4	ES cells	5590	577/4398	202/93663	-324	-324	60.8327
SRX7546914	Zic3	ES cells	6463	918/4398	322/93663	-324	-324	60.7155
SRX208049	Pou5f1	ES cells	7143	316/4398	111/93663	-324	-324	60.6285
SRX14663244	GFP	ES cells	12040	1220/4398	429/93663	-324	-324	60.5641
SRX13439134	Tbp	ES cells	19026	3122/4398	1099/93663	-324	-324	60.499
SRX6639877	Setd1a	ES cells	23271	3129/4398	1102/93663	-324	-324	60.4696
SRX13439086	Brd3	ES cells	17065	2731/4398	962/93663	-324	-324	60.4588
SRX5247637	Zbtb11	ES cells	13735	1144/4398	403/93663	-324	-324	60.4552
SRX11221878	Med1	ES cells	26882	3503/4398	1236/93663	-324	-324	60.358
SRX2831999	Kmt2d	ES cells	19188	2079/4398	735/93663	-324	-324	60.2393
SRX5401531	Yy1	ES cells	15450	1708/4398	604/93663	-324	-324	60.2232
SRX16844924	GFP	ES cells	20184	3198/4398	1134/93663	-324	-324	60.059
SRX12276169	Ctcf	ES cells	2639	324/4398	115/93663	-324	-324	60.0012
SRX2762150	Kmt2b	ES cells	22300	3161/4398	1126/93663	-324	-324	59.7859
SRX6768044	Rnf2	ES cells	11057	1314/4398	469/93663	-324	-324	59.6672
SRX5251393	Smad3	Embryoid Bodies	27285	3352/4398	1197/93663	-324	-324	59.6379
SRX6071873	Rnf2	ES cells	22201	3137/4398	1128/93663	-324	-324	59.2268
SRX14210151	Ing5	ES cells	9525	1102/4398	397/93663	-324	-324	59.1158
SRX10280236	Etv2	Embryoid Bodies	3309	324/4398	117/93663	-324	-324	58.9755
SRX6813450	Epitope tags	ES cells	19227	2126/4398	768/93663	-324	-324	58.9542
SRX11221941	Taf12	ES cells	23155	3426/4398	1238/93663	-324	-324	58.9359
SRX16815351	Pou5f1	ES cells	29818	2955/4398	1069/93663	-324	-324	58.8698
SRX5926393	Med24	ES cells	24738	3149/4398	1140/93663	-324	-324	58.8275
SRX16844920	GFP	ES cells	21218	3283/4398	1194/93663	-324	-324	58.5571
SRX2752336	Kmt2c	ES cells	12792	1293/4398	471/93663	-324	-324	58.4643
SRX11237533	Yy1	ES cells	19981	2112/4398	770/93663	-324	-324	58.4139
SRX2236921	Nanog	ES cells	3630	362/4398	132/93663	-324	-324	58.4047
SRX4506784	Smarca4	ES cells	13026	1790/4398	653/93663	-324	-324	58.3785
SRX5247632	Epitope tags	ES cells	19281	962/4398	351/93663	-324	-324	58.3688
SRX7845383	Ep300	ES cells	4287	353/4398	129/93663	-324	-324	58.2771
SRX4506782	Smarca4	ES cells	13144	1783/4398	652/93663	-324	-324	58.2394
SRX1831955	Rnf2	ES cells	8059	850/4398	311/93663	-324	-324	58.2065
SRX12798079	Smarca4	ES cells	14817	1561/4398	573/93663	-324	-324	58.0178
SRX12276173	Ctcf	ES cells	3501	438/4398	161/93663	-324	-324	57.9377
SRX10157267	Banp	ES cells	28841	3373/4398	1241/93663	-324	-324	57.8838
SRX6071844	Pcgf1	ES cells	8748	1030/4398	380/93663	-324	-324	57.7253
SRX16844918	GFP	ES cells	20412	3303/4398	1219/93663	-324	-324	57.7056
SRX9410191	GFP	ES cells	18782	1844/4398	681/93663	-324	-324	57.6669
SRX2415040	Mettl3	ES cells	28304	2885/4398	1068/93663	-324	-324	57.5291
SRX14672120	Zc3h4	ES cells	7708	994/4398	368/93663	-324	-324	57.5243
SRX10562781	Rara	ES cells	2863	356/4398	132/93663	-324	-324	57.4366
SRX16989242	Pou5f1	ES cells	15147	1542/4398	572/93663	-324	-324	57.4118
SRX19028412	Taf3	ES cells	26793	3372/4398	1251/93663	-324	-324	57.4041
SRX319957	Nanog	ES cells	5020	382/4398	142/93663	-324	-324	57.2912
SRX6033283	RAF1	ES cells	18224	1594/4398	593/93663	-324	-324	57.2462
SRX6768016	Rnf2	ES cells	10532	1102/4398	411/93663	-324	-324	57.1022
SRX5817863	Zfp281	ES cells	4445	550/4398	206/93663	-324	-324	56.8602
SRX2236907	Pou5f1	ES cells	5258	471/4398	177/93663	-324	-324	56.6709
SRX2236940	Sox2	ES cells	4198	526/4398	198/93663	-324	-324	56.5762
SRX9411718	Kdm1a	EpiLC	35607	2624/4398	989/93663	-324	-324	56.5042
SRX5388092	Trim28	ES cells	12010	610/4398	230/93663	-324	-324	56.4826
SRX803859	Rad23b	ES cells	28615	3065/4398	1156/93663	-324	-324	56.4658
SRX6454762	GFP	ES cells	4691	456/4398	172/93663	-324	-324	56.4611
SRX19028394	Epitope tags	ES cells	25953	3377/4398	1274/93663	-324	-324	56.4514
SRX5850123	Max	ES cells	26475	2587/4398	976/93663	-324	-324	56.4494
SRX11221877	Med1	ES cells	28527	3550/4398	1341/93663	-324	-324	56.3784
SRX16844886	GFP	ES cells	20801	3235/4398	1223/93663	-324	-324	56.3327
SRX368311	Msl2	mESC derived neural cells	13539	901/4398	341/93663	-324	-324	56.2708
SRX5850125	Max	ES cells	29495	2677/4398	1016/93663	-324	-324	56.1135
SRX213821	Pou5f1	ES cells	7701	634/4398	241/93663	-324	-324	56.0254
SRX16844916	GFP	ES cells	20298	3234/4398	1231/93663	-324	-324	55.9493
SRX19028411	Taf3	ES cells	28282	3472/4398	1322/93663	-324	-324	55.9321
SRX5027349	Pcgf6	ES cells	10282	1037/4398	395/93663	-324	-324	55.9106
SRX20248699	Trim28	ES cells	14335	391/4398	149/93663	-324	-324	55.886
SRX5251396	Smad4	Embryoid Bodies	11294	1316/4398	502/93663	-324	-324	55.8297
SRX19028413	Taf3	ES cells	28633	3531/4398	1355/93663	-324	-324	55.4972
SRX2236917	Sox2	ES cells	6744	628/4398	241/93663	-324	-324	55.4952
SRX16844921	GFP	ES cells	21803	3334/4398	1280/93663	-324	-324	55.4713
SRX468969	Klf4	ES cells	20883	1898/4398	729/93663	-324	-324	55.4474
SRX5251387	Smad3	ES cells	23018	2728/4398	1049/93663	-324	-324	55.3837
SRX3101083	Smad4	Embryoid Bodies	11273	1305/4398	502/93663	-324	-324	55.363
SRX5926392	Med24	ES cells	26520	3307/4398	1274/93663	-324	-324	55.2812
SRX2609737	Med1	ES cells	34642	3354/4398	1293/93663	-324	-324	55.243
SRX11221946	Taf1	ES cells	25243	3146/4398	1213/93663	-324	-324	55.2345
SRX5023748	Sox2	ES cells	4748	402/4398	155/93663	-324	-324	55.2341
SRX1280438	Nrf1	ES cells	26630	2347/4398	905/93663	-324	-324	55.2303
SRX16989243	Pou5f1	ES cells	13748	1370/4398	529/93663	-324	-324	55.1541
SRX11221948	Taf12	ES cells	29078	3589/4398	1387/93663	-324	-324	55.1074
SRX5371695	Sp3	ES cells	25693	3276/4398	1267/93663	-324	-324	55.0656
SRX4167116	Med1	ES cells	34697	3389/4398	1311/93663	-324	-324	55.0531
SRX12191048	Esrrb	ES cells	3235	398/4398	154/93663	-324	-324	55.0396
SRX10280239	Etv2	Embryoid Bodies	7887	756/4398	293/93663	-324	-324	54.9499
SRX9450272	Sin3a	ES cells	20152	3229/4398	1252/93663	-324	-324	54.9258
SRX214084	Pou5f1	ES cells	11630	995/4398	386/93663	-324	-324	54.897
SRX9349861	Epitope tags	ES cells	11823	322/4398	125/93663	-324	-324	54.8604
SRX9450551	Otx2	ES cells	23929	2646/4398	1028/93663	-324	-324	54.8163
SRX7416198	Hoxc10	Embryoid Bodies	10949	852/4398	332/93663	-324	-324	54.653
SRX8120165	O-GlcNAc	ES cells	22424	2714/4398	1058/93663	-324	-324	54.6307
SRX11237515	Yy1	ES cells	20266	1834/4398	715/93663	-324	-324	54.6268
SRX186548	Kdm2b	ES cells	33772	2569/4398	1002/93663	-324	-324	54.6021
SRX19951063	Epitope tags	ES cells	13411	1222/4398	477/93663	-324	-324	54.5589
SRX2991404	Epitope tags	ES cells	10604	760/4398	297/93663	-324	-324	54.4967
SRX16844905	GFP	ES cells	23168	3293/4398	1287/93663	-324	-324	54.4912
SRX15057955	Zic3	mESCs, differentiated	11220	1035/4398	405/93663	-324	-324	54.425
SRX16989251	Pou5f1	ES cells	6899	582/4398	228/93663	-324	-324	54.3627
SRX12276177	Ctcf	ES cells	3149	372/4398	146/93663	-324	-324	54.2629
SRX5926390	Med1	ES cells	28122	3205/4398	1259/93663	-324	-324	54.2145
SRX11123498	Sox2	ES cells	3889	444/4398	175/93663	-324	-324	54.0328
SRX4338269	Suz12	ES cells	15280	1363/4398	538/93663	-324	-324	53.9543
SRX4397573	Pou5f1	iPS cells	21133	1365/4398	539/93663	-324	-324	53.9333
SRX214068	Pou5f1	F9	27055	1962/4398	775/93663	-324	-324	53.9151
SRX657147	Med1	iPS cells	32177	2939/4398	1162/93663	-324	-324	53.865
SRX2744957	Cbx1	ES cells	12561	536/4398	212/93663	-324	-324	53.8446
SRX1831951	Rnf2	ES cells	13171	1384/4398	548/93663	-324	-324	53.7859
SRX5926391	Med1	ES cells	28019	3215/4398	1273/93663	-324	-324	53.7855
SRX368310	Msl2	mESC derived neural cells	12075	803/4398	318/93663	-324	-324	53.7776
SRX1997144	Ep300	Embryoid Bodies	36610	3113/4398	1236/93663	-324	-324	53.6381
SRX2353878	Rnf2	ES cells	12394	1529/4398	608/93663	-324	-324	53.5571
SRX2754629	Prdm15	ES cells	30862	2440/4398	971/93663	-324	-324	53.516
SRX16989250	Pou5f1	ES cells	6393	537/4398	214/93663	-324	-324	53.4408
SRX14663243	GFP	ES cells	17369	1756/4398	700/93663	-324	-324	53.4244
SRX027353	Ep300	ES cells	15887	1702/4398	679/93663	-324	-324	53.383
SRX16844893	GFP	ES cells	21710	3240/4398	1293/93663	-324	-324	53.3653
SRX12124816	Rnf2	PGCLC	16124	2034/4398	812/93663	-324	-324	53.3467
SRX9101831	Ezh2	ES cells	11496	861/4398	344/93663	-324	-324	53.3037
SRX16989249	Pou5f1	ES cells	9628	778/4398	311/93663	-324	-324	53.2761
SRX5371693	Sp3	ES cells	24132	3237/4398	1294/93663	-324	-324	53.2747
SRX1036413	Pou5f1	ES cells	5046	475/4398	190/93663	-324	-324	53.2418
SRX6768041	Rnf2	ES cells	9714	1034/4398	414/93663	-324	-324	53.1904
SRX149001	Ell3	ES cells	14114	1004/4398	402/93663	-324	-324	53.1888
SRX11237521	Yy1	ES cells	24396	2388/4398	961/93663	-324	-324	52.9205
SRX6033284	RAF1	ES cells	15454	1220/4398	491/93663	-324	-324	52.9165
SRX10280240	Etv2	Embryoid Bodies	5943	576/4398	232/93663	-324	-324	52.8746
SRX5247639	Zbtb11	ES cells	21676	2235/4398	901/93663	-324	-324	52.8282
SRX5926394	Med24	ES cells	29167	3370/4398	1359/93663	-324	-324	52.8109
SRX1158302	Rnf2	ES cells	20014	2114/4398	853/93663	-324	-324	52.7799
SRX13439087	Brd3	ES cells	19249	2759/4398	1116/93663	-324	-324	52.6502
SRX9641169	Sox2	ES cells	5276	445/4398	180/93663	-324	-324	52.6502
SRX1280437	Nrf1	ES cells	22425	1903/4398	770/93663	-324	-324	52.6333
SRX4178813	Dendra2	ES cells	28276	3224/4398	1306/93663	-324	-324	52.5732
SRX9187041	Epitope tags	ES cells	20583	2476/4398	1003/93663	-324	-324	52.573
SRX16844885	GFP	ES cells	22265	3270/4398	1327/93663	-324	-324	52.4795
SRX5027411	Pcgf6	ES cells	7683	766/4398	311/93663	-324	-324	52.4543
SRX1831953	Rnf2	ES cells	9794	934/4398	380/93663	-324	-324	52.3451
SRX5850119	Max	ES cells	28071	2625/4398	1068/93663	-324	-324	52.3445
SRX5251392	Smad2	Embryoid Bodies	26149	2708/4398	1104/93663	-324	-324	52.2387
SRX6489502	Pou5f1	ES cells	4800	485/4398	198/93663	-324	-324	52.1662
SRX542619	Epitope tags	ES cells	4497	404/4398	165/93663	-324	-324	52.1447
SRX2423274	GFP	ES cells	5063	526/4398	215/93663	-324	-324	52.1027
SRX16844911	GFP	ES cells	23177	3275/4398	1339/93663	-324	-324	52.0887
SRX18050973	Zc3h4	ES cells	8988	1220/4398	499/93663	-324	-324	52.0681
SRX6071846	Pcgf1	ES cells	8770	970/4398	397/93663	-324	-324	52.0348
SRX11123490	Nanog	ES cells	4502	420/4398	172/93663	-324	-324	52.0036
SRX381489	Rnf2	ES cells	6971	488/4398	200/93663	-324	-324	51.964
SRX5729490	Twist1	Embryoid Bodies	12640	719/4398	295/93663	-324	-324	51.9063
SRX8120164	O-GlcNAc	ES cells	28207	3152/4398	1297/93663	-324	-324	51.7558
SRX5850117	Max	ES cells	28974	2532/4398	1042/93663	-324	-324	51.7498
SRX2754630	Prdm15	ES cells	33324	2541/4398	1046/93663	-324	-324	51.7352
SRX213830	Pou5f1	ES cells	14865	1374/4398	566/93663	-324	-324	51.6991
SRX18050972	Zc3h4	ES cells	4751	636/4398	263/93663	-324	-324	51.5008
SRX4232700	Epitope tags	ES cells	35180	2706/4398	1121/93663	-324	-324	51.4085
SRX14672121	Zc3h4	ES cells	5578	772/4398	320/93663	-324	-324	51.3784
SRX9641215	Sox2	EpiLC	7365	663/4398	275/93663	-324	-324	51.3445
SRX5088234	Smc1a	ES cells	32788	1507/4398	626/93663	-324	-324	51.2686
SRX16844904	GFP	ES cells	24953	3331/4398	1385/93663	-324	-324	51.2198
SRX7529883	Rnf2	ES cells	5380	413/4398	172/93663	-324	-324	51.1369
SRX499140	Pou5f1	ES cells	15009	1383/4398	576/93663	-324	-324	51.1343
SRX5371697	Sp3	ES cells	26565	3306/4398	1377/93663	-324	-324	51.1307
SRX16844925	GFP	ES cells	23870	3307/4398	1382/93663	-324	-324	50.9611
SRX11237527	Yy1	ES cells	23266	2309/4398	965/93663	-324	-324	50.9577
SRX6033282	RAF1	ES cells	16508	1343/4398	562/93663	-324	-324	50.8924
SRX13332960	Kmt2d	ES cells	29215	2730/4398	1143/93663	-324	-324	50.8662
SRX14663246	GFP	ES cells	15178	1332/4398	558/93663	-324	-324	50.8373
SRX9187061	Epitope tags	ES cells	23273	2791/4398	1171/93663	-324	-324	50.7593
SRX2437563	Ep300	ES cells	8119	831/4398	349/93663	-324	-324	50.7094
SRX14663241	GFP	ES cells	24410	2664/4398	1119/93663	-324	-324	50.7011
SRX8713909	Myc	ES cells	6453	466/4398	196/93663	-324	-324	50.6341
SRX1342342	Pou5f1	ES cells	4418	370/4398	156/93663	-324	-324	50.5115
SRX1089848	Tbp	ES cells	17289	1848/4398	780/93663	-324	-324	50.4569
SRX151236	Tet1	P19	8818	331/4398	140/93663	-324	-324	50.3515
SRX186550	Rnf2	ES cells	14145	1058/4398	449/93663	-324	-324	50.1825
SRX12276167	Ctcf	ES cells	3552	392/4398	167/93663	-324	-324	49.9899
SRX11221944	Taf1	ES cells	28542	3390/4398	1446/93663	-324	-324	49.928
SRX6768027	Pcgf1	ES cells	7633	640/4398	273/93663	-324	-324	49.9264
SRX015778	Jarid2	ES cells	15811	1512/4398	646/93663	-324	-324	49.8462
SRX18050974	Zc3h4	ES cells	2614	330/4398	141/93663	-324	-324	49.8434
SRX11123488	Nanog	ES cells	12306	1292/4398	553/93663	-324	-324	49.7565
SRX3141811	Supt6	ES cells	4857	549/4398	235/93663	-324	-324	49.7528
SRX16844892	GFP	ES cells	23410	3302/4398	1415/93663	-324	-324	49.6974
SRX11237497	Yy1	ES cells	24273	2241/4398	961/93663	-324	-324	49.6628
SRX9450273	Sin3a	ES cells	22014	3320/4398	1424/93663	-324	-324	49.6525
SRX191943	Gata4	mESC derived mesodermal cells	28765	3031/4398	1301/93663	-324	-324	49.616
SRX4017941	Nanog	ES cells	4034	354/4398	152/93663	-324	-324	49.599
SRX4232702	Epitope tags	ES cells	21663	1164/4398	500/93663	-324	-324	49.5788
SRX20288174	Kdm1a	ES cells	20043	2057/4398	884/93663	-324	-324	49.5558
SRX9195301	Tbp	ES cells	32397	3312/4398	1424/93663	-324	-324	49.5328
SRX11123497	Sox2	ES cells	5932	609/4398	262/93663	-324	-324	49.5027
SRX825830	Runx1	mESC derived haematopoietic progenitor	26899	2338/4398	1006/93663	-324	-324	49.4948
SRX1539896	Rnf2	ES cells	10651	797/4398	343/93663	-324	-324	49.4854
SRX2612052	Nanog	ES cells	3297	331/4398	143/93663	-324	-324	49.2952
SRX11432373	Epitope tags	ES cells	9502	525/4398	227/93663	-324	-324	49.2545
SRX9450271	Sin3a	ES cells	23761	3446/4398	1491/93663	-324	-324	49.221
SRX248287	Nanog	Embryoid Bodies	55205	3129/4398	1354/93663	-324	-324	49.2153
SRX214067	Pou5f1	F9	24055	1982/4398	860/93663	-324	-324	49.0815
SRX1539902	Rnf2	ES cells	10702	667/4398	290/93663	-324	-324	48.9825
SRX13439089	Brd3	ES cells	19212	2480/4398	1079/93663	-324	-324	48.9489
SRX10560007	Med12	ES cells	5696	477/4398	208/93663	-324	-324	48.8391
SRX334975	Klf5	ES cells	29203	2401/4398	1049/93663	-324	-324	48.7449
SRX194534	Ep300	ES cells	7722	599/4398	262/93663	-324	-324	48.6898
SRX5054332	Epitope tags	ES cells	5564	505/4398	221/93663	-324	-324	48.6645
SRX15331378	Epitope tags	ES cells	8899	747/4398	327/93663	-324	-324	48.6503
SRX330667	Ezh2	ES cells	19694	1564/4398	685/93663	-324	-324	48.6249
SRX12276170	Ctcf	ES cells	4388	477/4398	209/93663	-324	-324	48.6054
SRX803857	Rad23b	ES cells	38535	3394/4398	1489/93663	-324	-324	48.5434
SRX482877	Rnf2	ES cells	14835	1397/4398	613/93663	-324	-324	48.5343
SRX381484	Rnf2	ES cells	10719	900/4398	395/93663	-324	-324	48.5242
SRX5374731	Pou5f1	ES cells	4845	369/4398	162/93663	-324	-324	48.5092
SRX1539899	Rnf2	ES cells	11997	854/4398	375/93663	-324	-324	48.4997
SRX13439136	Tbp	ES cells	21834	3195/4398	1404/93663	-324	-324	48.4637
SRX13439088	Brd3	ES cells	19722	2494/4398	1097/93663	-324	-324	48.4175
SRX3200445	Fli1	mESC derived haemogenic endothelium	10920	874/4398	385/93663	-324	-324	48.3463
SRX9641168	Sox2	ES cells	6248	472/4398	208/93663	-324	-324	48.3272
SRX2873907	Yy1	ES cells	27279	2738/4398	1207/93663	-324	-324	48.3102
SRX404069	Utf1	ES cells	39810	2443/4398	1077/93663	-324	-324	48.3082
SRX5926395	Med24	ES cells	31742	3437/4398	1516/93663	-324	-324	48.2829
SRX7529881	Rnf2	ES cells	4540	333/4398	147/93663	-324	-324	48.2436
SRX9858286	Trim28	ES cells	59088	2248/4398	994/93663	-324	-324	48.164
SRX11123489	Nanog	ES cells	14770	1522/4398	675/93663	-324	-324	48.0202
SRX6071868	Rnf2	ES cells	11899	1284/4398	570/93663	-324	-324	47.9737
SRX4017959	Sox2	ES cells	6311	565/4398	251/93663	-324	-324	47.9388
SRX6768017	Rnf2	ES cells	10036	1024/4398	455/93663	-324	-324	47.9293
SRX11416998	GFP	ES cells	27426	3214/4398	1430/93663	-324	-324	47.8655
SRX9450552	Otx2	ES cells	26902	2793/4398	1243/93663	-324	-324	47.8534
SRX11237509	Yy1	ES cells	27543	2543/4398	1132/93663	-324	-324	47.8424
SRX17793736	Myc	ES cells	5883	685/4398	305/93663	-324	-324	47.8304
SRX1404237	Cbfa2t2	ES cells	4402	390/4398	174/93663	-324	-324	47.734
SRX5027337	Pcgf2	ES cells	4010	329/4398	147/93663	-324	-324	47.6641
SRX147572	Zic3	ES cells	11823	870/4398	389/93663	-324	-324	47.6302
SRX6768029	Pcgf1	ES cells	9947	887/4398	397/93663	-324	-324	47.5824
SRX9450270	Sin3a	ES cells	22759	3342/4398	1497/93663	-324	-324	47.5442
SRX248284	Tbx3	ES cells	35316	1667/4398	749/93663	-324	-324	47.3987
SRX16844902	GFP	ES cells	25669	3340/4398	1501/93663	-324	-324	47.3891
SRX13439137	Tbp	ES cells	21947	3239/4398	1456/93663	-324	-324	47.3764
SRX7653550	Sox2	ES cells	4809	387/4398	174/93663	-324	-324	47.3669
SRX1845479	Epitope tags	ES cells	49778	2840/4398	1278/93663	-324	-324	47.3261
SRX1342338	Sox2	ES cells	5038	402/4398	181/93663	-324	-324	47.2999
SRX5054325	GFP	ES cells	5045	435/4398	196/93663	-324	-324	47.2657
SRX4178805	Dendra2	ES cells	28457	3322/4398	1497/93663	-324	-324	47.2597
SRX9101830	Ezh2	ES cells	11096	774/4398	349/93663	-324	-324	47.2311
SRX9858284	Trim28	ES cells	36585	889/4398	402/93663	-324	-324	47.0965
SRX2646179	Epitope tags	ES cells	49748	2839/4398	1284/93663	-324	-324	47.0883
SRX8736762	Kmt2d	Embryoid Bodies	9502	886/4398	401/93663	-324	-324	47.0546
SRX5023734	Pou5f1	ES cells	4467	331/4398	150/93663	-324	-324	46.9948
SRX2612049	Nanog	ES cells	4630	364/4398	165/93663	-324	-324	46.9819
SRX191945	Gata4	ES cells	6124	397/4398	180/93663	-324	-324	46.9711
SRX1080393	Tcf3	Embryoid Bodies	38236	3324/4398	1508/93663	-324	-324	46.9432
SRX11237503	Yy1	ES cells	27265	2510/4398	1139/93663	-324	-324	46.9313
SRX390399	Tcf12	mESC derived endodermal cells	41501	3269/4398	1488/93663	-324	-324	46.787
SRX11416999	GFP	ES cells	26567	3238/4398	1476/93663	-324	-324	46.7201
SRX4394645	Dppa4	iPS cells	19521	1048/4398	479/93663	-324	-324	46.5949
SRX6071869	Rnf2	ES cells	9775	1003/4398	459/93663	-324	-324	46.5373
SRX11123491	Nanog	ES cells	8134	750/4398	344/93663	-324	-324	46.4318
SRX8713913	Myc	iPS cells	5919	425/4398	195/93663	-324	-324	46.4159
SRX14595111	Fev	Embryoid Bodies	27572	1890/4398	868/93663	-324	-324	46.3719
SRX2236909	Pou5f1	ES cells	6392	507/4398	233/93663	-324	-324	46.3409
SRX12276175	Ctcf	ES cells	4460	448/4398	206/93663	-324	-324	46.3152
SRX6768040	Rnf2	ES cells	15226	1672/4398	769/93663	-324	-324	46.3045
SRX499126	Ep300	EpiLC	32582	3204/4398	1476/93663	-324	-324	46.2295
SRX977371	Epitope tags	iPSC intermediates	38013	3073/4398	1417/93663	-324	-324	46.1855
SRX15057958	Zic3	mESCs, differentiated	22577	1893/4398	874/93663	-324	-324	46.1267
SRX3020599	Wdr11	ES cells	5875	662/4398	306/93663	-324	-324	46.0733
SRX10157268	Banp	ES cells	36792	3503/4398	1627/93663	-324	-324	45.8528
SRX16844890	GFP	ES cells	24718	3245/4398	1508/93663	-324	-324	45.8275
SRX390391	Smad2	ES cells	31569	2658/4398	1236/93663	-324	-324	45.7983
SRX14663245	GFP	ES cells	12692	1024/4398	478/93663	-324	-324	45.6231
SRX194535	Ep300	ES cells	6852	529/4398	247/93663	-324	-324	45.6112
SRX3200442	Fli1	mESC derived haemogenic endothelium	16219	1393/4398	651/93663	-324	-324	45.5704
SRX12124851	Rnf2	PGCLC	8708	824/4398	386/93663	-324	-324	45.4624
SRX2762172	Setd1a	ES cells	27354	3350/4398	1570/93663	-324	-324	45.4421
SRX213793	Kdm4c	ES cells	46801	3145/4398	1475/93663	-324	-324	45.409
SRX3730212	Ep300	ES cells	18650	1402/4398	658/93663	-324	-324	45.3769
SRX2236913	Sox2	ES cells	9285	783/4398	368/93663	-324	-324	45.3134
SRX047141	Kdm1a	ES cells	42904	3702/4398	1752/93663	-324	-324	45.0003
SRX7416199	Hoxc10	Embryoid Bodies	7055	436/4398	207/93663	-324	-324	44.8569
SRX5817864	Zfp281	ES cells	7311	696/4398	331/93663	-324	-324	44.781
SRX470061	Epitope tags	ES cells	17929	1754/4398	836/93663	-324	-324	44.6824
SRX2455331	Zfp281	EpiSC	6547	587/4398	280/93663	-324	-324	44.6471
SRX213809	Pou5f1	ES cells	8736	762/4398	364/93663	-324	-324	44.5827
SRX4506771	Arid1a	ES cells	8087	730/4398	349/93663	-324	-324	44.5462
SRX14672122	Zc3h4	ES cells	10161	1221/4398	584/93663	-324	-324	44.5262
SRX16844917	GFP	ES cells	25158	3376/4398	1619/93663	-324	-324	44.4087
SRX2458511	Epitope tags	ES cells	11396	540/4398	259/93663	-324	-324	44.4024
SRX2236918	Sox2	ES cells	8607	667/4398	320/93663	-324	-324	44.3904
SRX1158300	Rnf2	ES cells	19627	1557/4398	747/93663	-324	-324	44.3896
SRX15057960	Zic3	mESCs, differentiated	14082	1149/4398	552/93663	-324	-324	44.3296
SRX2762170	Kmt2b	ES cells	28756	3212/4398	1544/93663	-324	-324	44.3038
SRX16844891	GFP	ES cells	26317	3291/4398	1582/93663	-324	-324	44.3031
SRX7653549	Pou5f1	ES cells	17503	1271/4398	611/93663	-324	-324	44.3014
SRX5054329	GFP	ES cells	7583	612/4398	296/93663	-324	-324	44.0324
SRX16844889	GFP	ES cells	26200	3293/4398	1593/93663	-324	-324	44.0239
SRX6799347	Epitope tags	Embryoid Bodies	5710	341/4398	165/93663	-324	-324	44.0132
SRX873858	GFP	ES cells	10711	928/4398	450/93663	-324	-324	43.9186
SRX6071870	Rnf2	ES cells	14648	1573/4398	763/93663	-324	-324	43.9053
SRX6879009	Pou5f1	ES cells	22440	1568/4398	763/93663	-324	-324	43.7657
SRX9446566	Pou2f1	mESC derived mesodermal cells	45582	3183/4398	1549/93663	-324	-324	43.7621
SRX186551	Kdm2b	ES cells	15182	551/4398	269/93663	-324	-324	43.6227
SRX1158301	Rnf2	ES cells	5614	425/4398	208/93663	-324	-324	43.5149
SRX11677013	Ints3	ES cells	29649	3528/4398	1728/93663	-324	-324	43.4808
SRX2498434	Epitope tags	ES cells	29917	2955/4398	1457/93663	-324	-324	43.1927
SRX657149	Med1	iPS cells	39659	3535/4398	1743/93663	-324	-324	43.1922
SRX1081727	Epitope tags	ES cells	7838	626/4398	309/93663	-324	-324	43.1448
SRX2236932	Pou5f1	ES cells	5751	478/4398	236/93663	-324	-324	43.1349
SRX2236919	Nanog	ES cells	5995	457/4398	226/93663	-324	-324	43.0646
SRX9450268	Sin3a	ES cells	28745	3609/4398	1786/93663	-324	-324	43.0346
SRX11416997	GFP	ES cells	30866	3297/4398	1632/93663	-324	-324	43.0241
SRX13332923	Dnttip1	ES cells	22309	2404/4398	1191/93663	-324	-324	42.9868
SRX3038041	Pou5f1	iPS cells	22091	1660/4398	823/93663	-324	-324	42.9557
SRX11221945	Taf1	ES cells	31881	3446/4398	1710/93663	-324	-324	42.9173
SRX12124850	Rnf2	PGCLC	9313	897/4398	447/93663	-324	-324	42.7364
SRX2236934	Pou5f1	ES cells	8749	774/4398	386/93663	-324	-324	42.7038
SRX4397583	Pou5f1	iPS cells	42241	3610/4398	1802/93663	-324	-324	42.6644
SRX12124754	Rnf2	ES cells	14097	1509/4398	756/93663	-324	-324	42.5089
SRX7176630	Ssrp1	ES cells	14035	1077/4398	540/93663	-324	-324	42.4751
SRX11221955	Taf12	ES cells	40309	3501/4398	1757/93663	-324	-324	42.4359
SRX16844909	GFP	ES cells	27438	3383/4398	1698/93663	-324	-324	42.4304
SRX7653541	Sox2	ES cells	5529	408/4398	205/93663	-324	-324	42.3857
SRX10157266	Banp	ES cells	43908	3731/4398	1875/93663	-324	-324	42.3776
SRX5027410	Usf1	ES cells	7416	660/4398	332/93663	-324	-324	42.3369
SRX6768028	Pcgf1	ES cells	7037	480/4398	242/93663	-324	-324	42.2414
SRX027354	Ep300	ES cells	16065	1373/4398	693/93663	-324	-324	42.1939
SRX11677014	Ints3	ES cells	30642	3551/4398	1793/93663	-324	-324	42.1777
SRX9858293	Pou5f1	ES cells	6622	598/4398	302/93663	-324	-324	42.1703
SRX9858290	Ep300	ES cells	19780	2030/4398	1030/93663	-324	-324	41.9732
SRX2612040	Ss18	ES cells	8082	570/4398	290/93663	-324	-324	41.8591
SRX1158299	Rnf2	ES cells	32363	2972/4398	1515/93663	-324	-324	41.7781
SRX12142055	Zic3	mESCs, differentiated	9648	722/4398	369/93663	-324	-324	41.67
SRX12124849	Rnf2	PGCLC	13400	1258/4398	643/93663	-324	-324	41.6661
SRX5247634	Epitope tags	ES cells	27486	2131/4398	1090/93663	-324	-324	41.6361
SRX191944	Gata4	mESC derived mesodermal cells	33346	3253/4398	1665/93663	-324	-324	41.6086
SRX977379	Pou5f1	iPSC intermediates	43915	3321/4398	1701/93663	-324	-324	41.5793
SRX373167	GFP	ES cells	30878	3181/4398	1630/93663	-324	-324	41.5613
SRX062994	Ep300	ES cells	41370	3166/4398	1630/93663	-324	-324	41.3653
SRX16844910	GFP	ES cells	28121	3396/4398	1749/93663	-324	-324	41.3514
SRX214083	Pou5f1	ES cells	14824	1073/4398	553/93663	-324	-324	41.3226
SRX6706337	Rnf2	ES cells	5529	368/4398	190/93663	-324	-324	41.2484
SRX4394631	Dppa4	ES cells	23940	1121/4398	581/93663	-324	-324	41.0906
SRX1158297	Rnf2	ES cells	20233	1661/4398	861/93663	-324	-324	41.0846
SRX9858285	Trim28	ES cells	32104	619/4398	321/93663	-324	-324	41.0675
SRX143842	Ep300	ES cells	41387	3154/4398	1636/93663	-324	-324	41.0574
SRX12142046	Zic3	mESCs, differentiated	19904	1564/4398	814/93663	-324	-324	40.919
SRX194533	Ep300	ES cells	9069	553/4398	288/93663	-324	-324	40.8927
SRX1556087	Trim28	ES cells	12554	369/4398	193/93663	-324	-324	40.7176
SRX8844232	Olig2	EpiSC	25279	2080/4398	1088/93663	-324	-324	40.7143
SRX6706336	Rnf2	ES cells	11116	1045/4398	547/93663	-324	-324	40.6857
SRX2762151	Kmt2d	ES cells	35248	3460/4398	1813/93663	-324	-324	40.6435
SRX3753618	Nipbl	ES cells	31269	2529/4398	1326/93663	-324	-324	40.618
SRX9858292	Pou5f1	ES cells	6307	614/4398	322/93663	-324	-324	40.6093
SRX1831952	Rnf2	ES cells	8452	640/4398	336/93663	-324	-324	40.5652
SRX12124753	Rnf2	ES cells	14461	1524/4398	801/93663	-324	-324	40.5196
SRX977376	Pou5f1	iPSC intermediates	43190	2486/4398	1307/93663	-324	-324	40.5078
SRX16844888	GFP	ES cells	27747	3321/4398	1746/93663	-324	-324	40.5077
SRX11677011	Ints3	ES cells	30641	3523/4398	1856/93663	-324	-324	40.4248
SRX218273	Biotin	ES cells	7994	567/4398	299/93663	-324	-324	40.3854
SRX214082	Pou5f1	ES cells	38246	2707/4398	1432/93663	-324	-324	40.2585
SRX4054005	Ascl1	Embryoid Bodies	16702	1197/4398	634/93663	-324	-324	40.2085
SRX499141	Otx2	ES cells	24322	1808/4398	959/93663	-324	-324	40.1507
SRX12276171	Ctcf	ES cells	7775	616/4398	327/93663	-324	-324	40.1186
SRX470063	Epitope tags	ES cells	12416	1134/4398	602/93663	-324	-324	40.1171
SRX9450269	Sin3a	ES cells	28436	3593/4398	1909/93663	-324	-324	40.0834
SRX381485	Rnf2	ES cells	9062	656/4398	349/93663	-324	-324	40.0305
SRX695695	Zic2	ES cells	10694	942/4398	502/93663	-324	-324	39.9632
SRX695696	Zic2	ES cells	14409	1060/4398	566/93663	-324	-324	39.8843
SRX477548	Biotin	ES cells	6875	451/4398	241/93663	-324	-324	39.854
SRX9858281	Trim28	ES cells	30682	570/4398	305/93663	-324	-324	39.8004
SRX3038015	Pou5f1	iPS cells	6159	454/4398	243/93663	-324	-324	39.7889
SRX2539828	Kdm5c	ES cells	26195	2267/4398	1216/93663	-324	-324	39.7037
SRX499143	Otx2	ES cells	40201	2665/4398	1431/93663	-324	-324	39.6616
SRX13332925	Dnttip1	ES cells	25621	2649/4398	1425/93663	-324	-324	39.5895
SRX4580513	Smarca4	ES cells	32083	3152/4398	1697/93663	-324	-324	39.5564
SRX5054316	Epitope tags	ES cells	6112	427/4398	230/93663	-324	-324	39.5378
SRX16703096	Esrrb	ES cells	4196	349/4398	188/93663	-324	-324	39.5349
SRX2236920	Nanog	ES cells	7801	507/4398	274/93663	-324	-324	39.4067
SRX977378	Pou5f1	iPSC intermediates	43230	2995/4398	1621/93663	-324	-324	39.3484
SRX5054326	GFP	ES cells	10757	794/4398	430/93663	-324	-324	39.3247
SRX7546911	Zic3	ES cells	9575	781/4398	423/93663	-324	-324	39.3209
SRX2831996	Kdm1a	ES cells	35224	2870/4398	1557/93663	-324	-324	39.256
SRX11677007	Tbp	ES cells	34223	3762/4398	2047/93663	-324	-324	39.1394
SRX1342344	Pou5f1	ES cells	7463	490/4398	267/93663	-324	-324	39.0839
SRX5251394	Smad3	Embryoid Bodies	40412	3591/4398	1959/93663	-324	-324	39.0386
SRX2498439	Epitope tags	ES cells	34802	2866/4398	1566/93663	-324	-324	38.976
SRX15831061	Suz12	ES cells	10582	889/4398	486/93663	-324	-324	38.9564
SRX499128	Pou5f1	EpiLC	34323	2848/4398	1562/93663	-324	-324	38.8304
SRX14834579	Sox2	ES cells	4919	350/4398	192/93663	-324	-324	38.8222
SRX3087137	Sox2	ES cells	5545	448/4398	246/93663	-324	-324	38.7843
SRX13439133	Taf3	ES cells	27781	3311/4398	1819/93663	-324	-324	38.765
SRX466435	Epitope tags	ES cells	6048	473/4398	260/93663	-324	-324	38.7437
SRX2007468	Epitope tags	ES cells	7255	531/4398	292/93663	-324	-324	38.7279
SRX4232703	Epitope tags	ES cells	8689	461/4398	254/93663	-324	-324	38.6527
SRX11677016	Ssrp1	ES cells	38289	3402/4398	1877/93663	-324	-324	38.5996
SRX6768014	Rnf2	ES cells	13243	1323/4398	732/93663	-324	-324	38.4912
SRX2744958	Cbx1	ES cells	18704	552/4398	306/93663	-324	-324	38.4176
SRX994817	Nrf1	ES cells	37952	3018/4398	1675/93663	-324	-324	38.3722
SRX2236933	Pou5f1	ES cells	9137	702/4398	390/93663	-324	-324	38.3341
SRX2415029	Mettl3	ES cells	32457	1020/4398	567/93663	-324	-324	38.3116
SRX3038013	Pou5f1	iPS cells	5636	356/4398	198/93663	-324	-324	38.2911
SRX8556272	Kmt2b	ES cells	33199	3436/4398	1912/93663	-324	-324	38.2717
SRX16844908	GFP	ES cells	30710	3435/4398	1916/93663	-324	-324	38.1807
SRX13439109	Taf3	ES cells	25874	3407/4398	1901/93663	-324	-324	38.1683
SRX13439131	Taf3	ES cells	26450	3426/4398	1912/93663	-324	-324	38.1603
SRX4403325	Chd4	ES cells	9087	499/4398	279/93663	-324	-324	38.0898
SRX214078	Pou5f1	ES cells	36037	2525/4398	1413/93663	-324	-324	38.0568
SRX470060	Epitope tags	ES cells	22556	1658/4398	928/93663	-324	-324	38.0495
SRX213829	Nanog	ES cells	14451	973/4398	545/93663	-324	-324	38.0215
SRX8844233	Olig2	EpiSC	31575	2506/4398	1405/93663	-324	-324	37.9855
SRX466434	Epitope tags	ES cells	18256	1382/4398	775/93663	-324	-324	37.9769
SRX9446558	Pou5f1	ES cells	55349	3177/4398	1792/93663	-324	-324	37.7565
SRX3020598	Wdr11	ES cells	6681	689/4398	389/93663	-324	-324	37.7209
SRX2539827	Kdm5c	ES cells	28654	2468/4398	1394/93663	-324	-324	37.7047
SRX194543	Ep300	ES cells	11786	722/4398	408/93663	-324	-324	37.6869
SRX6768015	Rnf2	ES cells	10265	956/4398	541/93663	-324	-324	37.6334
SRX3038040	Pou5f1	iPS cells	31150	1897/4398	1076/93663	-324	-324	37.5464
SRX3581840	Epitope tags	ES cells	24054	1087/4398	617/93663	-324	-324	37.5195
SRX1592541	Pou5f1	ES cells	7888	442/4398	251/93663	-324	-324	37.5026
SRX4594901	Smarca4	ES cells	7227	449/4398	255/93663	-324	-324	37.4989
SRX1738884	Zfp281	ES cells	9466	778/4398	442/93663	-324	-324	37.4861
SRX2609732	Ino80	ES cells	44947	2167/4398	1232/93663	-324	-324	37.4594
SRX6461382	Epitope tags	ES cells	24141	1090/4398	620/93663	-324	-324	37.441
SRX5600784	Setd1a	ES cells	42484	3220/4398	1832/93663	-324	-324	37.432
SRX11677010	Tbp	ES cells	37320	3807/4398	2169/93663	-324	-324	37.3797
SRX977370	Epitope tags	iPSC intermediates	47870	3389/4398	1932/93663	-324	-324	37.3575
SRX6879007	Pbx1	ES cells	23453	1349/4398	770/93663	-324	-324	37.3108
SRX11677012	Ints3	ES cells	33780	3604/4398	2059/93663	-324	-324	37.277
SRX2423276	GFP	ES cells	13037	1085/4398	620/93663	-324	-324	37.2693
SRX13439093	Brd4	ES cells	26376	2658/4398	1521/93663	-324	-324	37.2168
SRX470062	Epitope tags	ES cells	4861	433/4398	248/93663	-324	-324	37.1834
SRX6489499	Pou5f1	ES cells	7161	509/4398	292/93663	-324	-324	37.1234
SRX6489501	Pou5f1	ES cells	8675	603/4398	346/93663	-324	-324	37.1154
SRX3898502	Brd4	ES cells	36178	3214/4398	1846/93663	-324	-324	37.0789
SRX8736760	Kmt2d	Embryoid Bodies	16397	1147/4398	659/93663	-324	-324	37.0673
SRX194541	Ep300	ES cells	11145	627/4398	361/93663	-324	-324	36.9891
SRX4054004	Ascl1	Embryoid Bodies	12376	877/4398	506/93663	-324	-324	36.9115
SRX093166	Esrrb	ES cells	14780	763/4398	441/93663	-324	-324	36.8467
SRX11677009	Tbp	ES cells	37830	3808/4398	2201/93663	-324	-324	36.8459
SRX147771	Epitope tags	ES cells	50547	3437/4398	1991/93663	-324	-324	36.7639
SRX5027338	Pcgf2	ES cells	4574	388/4398	225/93663	-324	-324	36.725
SRX13439091	Brd4	ES cells	26541	2843/4398	1649/93663	-324	-324	36.7172
DRX046376	Prdm14	EpiLC	6155	374/4398	217/93663	-324	-324	36.705
SRX194542	Ep300	ES cells	14447	925/4398	537/93663	-324	-324	36.6843
SRX2415026	Mettl3	ES cells	62310	1576/4398	915/93663	-324	-324	36.6816
SRX2007467	Epitope tags	ES cells	7395	508/4398	295/93663	-324	-324	36.6737
SRX2612043	Ss18	ES cells	7362	431/4398	251/93663	-324	-324	36.5693
SRX2498437	Epitope tags	ES cells	37759	2964/4398	1727/93663	-324	-324	36.551
SRX218272	Epitope tags	ES cells	8093	519/4398	303/93663	-324	-324	36.4786
SRX13439090	Brd4	ES cells	27060	2831/4398	1653/93663	-324	-324	36.4737
SRX12124817	Rnf2	PGCLC	5175	392/4398	229/93663	-324	-324	36.4555
SRX9410195	GFP	ES cells	33039	2056/4398	1206/93663	-324	-324	36.3069
SRX11677008	Tbp	ES cells	38404	3823/4398	2245/93663	-324	-324	36.2661
SRX12191047	Esrrb	ES cells	8577	720/4398	423/93663	-324	-324	36.2497
SRX8736761	Kmt2d	ES cells	26637	2208/4398	1299/93663	-324	-324	36.1995
SRX7653540	Pou5f1	ES cells	10737	643/4398	379/93663	-324	-324	36.1314
SRX7546912	Zic3	ES cells	14843	1092/4398	644/93663	-324	-324	36.1118
SRX5347751	Setdb1	ES cells	28275	617/4398	364/93663	-324	-324	36.0991
SRX9410194	GFP	ES cells	29685	1802/4398	1065/93663	-324	-324	36.0345
SRX16101720	Smarca4	ES cells	10180	724/4398	428/93663	-324	-324	36.0253
SRX1342341	Pou5f1	ES cells	8930	581/4398	344/93663	-324	-324	35.9692
SRX2894852	Ino80	ES cells	45825	2219/4398	1315/93663	-324	-324	35.9372
SRX6827271	Sox2	ES cells	11009	593/4398	352/93663	-324	-324	35.8777
SRX6879010	Sox2	ES cells	7991	517/4398	307/93663	-324	-324	35.8645
SRX2437564	Ep300	ES cells	18805	1506/4398	895/93663	-324	-324	35.8356
SRX381486	Rnf2	ES cells	9783	538/4398	320/93663	-324	-324	35.8051
SRX390396	Smad2	mESC derived endodermal cells	58377	3303/4398	1969/93663	-324	-324	35.7253
SRX5600783	Setd1a	ES cells	41755	3572/4398	2131/93663	-324	-324	35.6977
SRX14595112	Fev	Embryoid Bodies	42690	2582/4398	1541/93663	-324	-324	35.6834
SRX466437	Epitope tags	ES cells	19347	1264/4398	755/93663	-324	-324	35.6544
SRX12260419	Ctcf	mESC derived erythroid cells	44318	3037/4398	1816/93663	-324	-324	35.6157
SRX17066025	Ctcf	mESC derived erythroid cells	44318	3037/4398	1816/93663	-324	-324	35.6157
SRX8642890	Rad21	ES cells	38632	2847/4398	1704/93663	-324	-324	35.582
SRX6831866	Smc1a	ES cells	12681	1049/4398	628/93663	-324	-324	35.5737
SRX1081728	Epitope tags	ES cells	8726	609/4398	365/93663	-324	-324	35.5334
SRX470058	Epitope tags	ES cells	41346	2611/4398	1566/93663	-324	-324	35.5081
SRX5578661	Biotin	ES cells	16268	938/4398	564/93663	-324	-324	35.419
SRX12142051	Zic3	mESCs, differentiated	14780	942/4398	569/93663	-324	-324	35.2575
SRX109459	Hoxb4	Embryoid Bodies	29561	1649/4398	998/93663	-324	-324	35.1887
SRX2752335	Kmt2c	ES cells	40637	2946/4398	1785/93663	-324	-324	35.1485
SRX837357	Myod1	P19	13727	650/4398	394/93663	-324	-324	35.1342
SRX837356	Myod1	P19	12836	595/4398	361/93663	-324	-324	35.1013
SRX4403303	Chd4	ES cells	14378	637/4398	388/93663	-324	-324	34.964
SRX9858282	Trim28	ES cells	24556	392/4398	239/93663	-324	-324	34.9302
SRX4338268	Suz12	ES cells	12261	769/4398	471/93663	-324	-324	34.7711
SRX1080398	Tcf3	ES cells	45699	3157/4398	1939/93663	-324	-324	34.6745
SRX6827270	Pou5f1	ES cells	20094	1035/4398	636/93663	-324	-324	34.6574
SRX101594	Meis1	P19	27566	890/4398	548/93663	-324	-324	34.5877
SRX2270102	Ep300	ES cells	44572	3353/4398	2065/93663	-324	-324	34.5801
SRX16101716	Smarca4	ES cells	10004	712/4398	439/93663	-324	-324	34.5405
SRX11221956	Taf12	ES cells	50420	3547/4398	2188/93663	-324	-324	34.5244
SRX14210166	Ing5	ES cells	24941	2248/4398	1387/93663	-324	-324	34.517
SRX11525495	Sumo1	ES cells	57337	2052/4398	1267/93663	-324	-324	34.4916
SRX4403317	Sin3a	ES cells	41413	3811/4398	2356/93663	-324	-324	34.449
SRX499125	Ep300	EpiLC	19155	1457/4398	902/93663	-324	-324	34.4006
SRX1704889	Nanog	ES cells	48047	3274/4398	2029/93663	-324	-324	34.3645
SRX16815352	Pou5f1	ES cells	56263	3369/4398	2089/93663	-324	-324	34.3459
SRX16736262	Kmt2d	ES cells	8531	653/4398	405/93663	-324	-324	34.3377
SRX12191046	Esrrb	ES cells	9104	602/4398	374/93663	-324	-324	34.2798
SRX433130	Sox2	ES cells	13474	600/4398	373/93663	-324	-324	34.2575
SRX7205310	Rnf2	ES cells	32470	2607/4398	1624/93663	-324	-324	34.1875
SRX12124913	Rad21	Germline stem cell-like cells	9239	709/4398	442/93663	-324	-324	34.1615
SRX9858294	Pou5f1	ES cells	11571	949/4398	592/93663	-324	-324	34.1395
SRX12124785	Rnf2	EpiLC	11622	1005/4398	627/93663	-324	-324	34.1359
SRX8994338	Sox2	ES cells	7096	426/4398	266/93663	-324	-324	34.1068
SRX5347749	Setdb1	ES cells	31415	632/4398	395/93663	-324	-324	34.0748
SRX1158296	Rnf2	ES cells	13327	1008/4398	631/93663	-324	-324	34.0208
SRX3038048	Sox2	iPS cells	17001	987/4398	618/93663	-324	-324	34.0127
SRX1158298	Rnf2	ES cells	10319	735/4398	461/93663	-324	-324	33.9546
SRX8994339	Sox2	ES cells	6698	412/4398	259/93663	-324	-324	33.8774
SRX5251389	Foxh1	ES cells	47947	3923/4398	2469/93663	-324	-324	33.8384
SRX9446564	Pou2f1	mESC derived mesodermal cells	54375	3294/4398	2077/93663	-324	-324	33.7754
SRX16736263	Kmt2d	ES cells	9680	721/4398	455/93663	-324	-324	33.7471
SRX5817866	Zfp281	ES cells	9337	711/4398	449/93663	-324	-324	33.7238
SRX8003648	Epitope tags	ES cells	5979	359/4398	227/93663	-324	-324	33.6807
SRX16703098	Esrrb	ES cells	5032	374/4398	237/93663	-324	-324	33.6075
SRX5054330	GFP	ES cells	20330	1347/4398	854/93663	-324	-324	33.591
SRX209316	Sox2	ES cells	8362	574/4398	364/93663	-324	-324	33.5833
SRX16703097	Esrrb	ES cells	6394	476/4398	302/93663	-324	-324	33.567
SRX2332425	Sox2	ES cells	8794	654/4398	415/93663	-324	-324	33.5616
SRX11677017	Ssrp1	ES cells	40527	3525/4398	2240/93663	-324	-324	33.5138
SRX499114	Pou5f1	ES cells	45760	3200/4398	2037/93663	-324	-324	33.4558
SRX2762171	Kmt2d	ES cells	42283	3598/4398	2291/93663	-324	-324	33.4464
SRX3038042	Pou5f1	iPS cells	24558	1460/4398	930/93663	-324	-324	33.4336
SRX977367	Epitope tags	iPSC intermediates	56508	2842/4398	1819/93663	-324	-324	33.2739
SRX9101846	Ezh2	ES cells	17747	1105/4398	709/93663	-324	-324	33.1917
SRX7176634	GFP	ES cells	16790	463/4398	298/93663	-324	-324	33.0885
SRX8701151	Setdb1	ES cells	24344	449/4398	289/93663	-324	-324	33.0873
SRX1670203	Rad21	ES cells	34918	2689/4398	1732/93663	-324	-324	33.064
SRX5054317	Epitope tags	ES cells	9151	575/4398	371/93663	-324	-324	33.0071
SRX1670183	Rad21	ES cells	30414	2392/4398	1550/93663	-324	-324	32.8657
SRX7205308	Rnf2	ES cells	21096	1714/4398	1111/93663	-324	-324	32.8556
SRX6706333	Rnf2	ES cells	11338	910/4398	590/93663	-324	-324	32.8475
SRX16736245	Kmt2d	ES cells	13734	944/4398	613/93663	-324	-324	32.7963
SRX554627	Suz12	ES cells	16145	746/4398	485/93663	-324	-324	32.7574
SRX470064	Epitope tags	ES cells	6574	539/4398	351/93663	-324	-324	32.7035
SRX2612053	Nanog	ES cells	6642	506/4398	330/93663	-324	-324	32.655
SRX6768059	Rnf2	ES cells	6153	403/4398	263/93663	-324	-324	32.6334
SRX6706332	Rnf2	ES cells	11679	883/4398	577/93663	-324	-324	32.591
SRX6879006	Esrrb	ES cells	13693	643/4398	421/93663	-324	-324	32.5268
SRX5027354	Rnf2	ES cells	7011	464/4398	305/93663	-324	-324	32.399
SRX17066027	Ctcf	mESC derived erythroid cells	51167	2931/4398	1928/93663	-324	-324	32.3759
DRX046377	Prdm14	EpiLC	7193	377/4398	248/93663	-324	-324	32.3745
SRX9446557	Pou2f1	ES cells	55699	3424/4398	2253/93663	-324	-324	32.3657
SRX1342343	Pou5f1	ES cells	10925	645/4398	425/93663	-324	-324	32.3209
SRX11540091	Sox2	EpiLC	7628	434/4398	286/93663	-324	-324	32.3174
SRX319550	Myc	ES cells	7966	490/4398	323/93663	-324	-324	32.3077
SRX8120163	O-GlcNAc	ES cells	47751	3575/4398	2357/93663	-324	-324	32.302
SRX977377	Pou5f1	iPSC intermediates	57245	2818/4398	1861/93663	-324	-324	32.2483
SRX16815353	Pou5f1	ES cells	77488	3290/4398	2175/93663	-324	-324	32.2144
SRX5858856	Smc1a	ES cells	44106	2152/4398	1424/93663	-324	-324	32.1844
SRX4594910	Pou5f1	ES cells	10291	548/4398	363/93663	-324	-324	32.1504
SRX16815354	Pou5f1	ES cells	71174	3026/4398	2006/93663	-324	-324	32.1256
SRX11677015	Ssrp1	ES cells	42389	3501/4398	2321/93663	-324	-324	32.124
SRX12124786	Rnf2	EpiLC	11604	933/4398	619/93663	-324	-324	32.0999
SRX2831316	Sumo2	ES cells	34905	901/4398	598/93663	-324	-324	32.0875
SRX4594909	Pou5f1	ES cells	9196	488/4398	324/93663	-324	-324	32.0765
SRX11525496	Sumo1	ES cells	60303	2341/4398	1557/93663	-324	-324	32.0203
SRX3200453	Runx1	mESC derived haemogenic endothelium	34135	1822/4398	1212/93663	-324	-324	32.0154
SRX1063117	Rnf2	ES cells	10032	386/4398	257/93663	-324	-324	31.9865
SRX499113	Ep300	ES cells	16037	1130/4398	753/93663	-324	-324	31.9592
SRX5242837	Rnf2	ES cells	15288	1368/4398	913/93663	-324	-324	31.9101
SRX2043691	Sall4	ES cells	8154	476/4398	318/93663	-324	-324	31.8781
SRX4594913	Sox2	ES cells	14420	917/4398	613/93663	-324	-324	31.8582
SRX13439092	Brd4	ES cells	31232	2888/4398	1931/93663	-324	-324	31.8513
SRX476210	Zfp57	ES cells	70815	1625/4398	1087/93663	-324	-324	31.8373
SRX1539897	Rnf2	ES cells	8453	411/4398	275/93663	-324	-324	31.8289
SRX994816	Nrf1	ES cells	52877	3415/4398	2293/93663	-324	-324	31.7175
SRX2612054	Nanog	ES cells	9614	711/4398	478/93663	-324	-324	31.6778
SRX8517911	Esrrb	ES cells	5883	406/4398	273/93663	-324	-324	31.6721
SRX11525491	Sumo1	ES cells	61257	2071/4398	1394/93663	-324	-324	31.6395
SRX3038019	Sox2	iPS cells	11131	705/4398	475/93663	-324	-324	31.6088
SRX977375	Pou5f1	iPSC intermediates	50801	2484/4398	1676/93663	-324	-324	31.5639
SRX9858295	Pou5f1	ES cells	8746	652/4398	441/93663	-324	-324	31.4863
SRX003867	Sox2	ES cells	8798	499/4398	338/93663	-324	-324	31.441
SRX9195307	Pou5f1	ES cells	6393	394/4398	267/93663	-324	-324	31.4266
SRX7529880	Rnf2	ES cells	8537	643/4398	436/93663	-324	-324	31.4078
SRX9195320	Pou5f1	ES cells	7256	435/4398	295/93663	-324	-324	31.4036
SRX5374732	Pou5f1	ES cells	9644	596/4398	405/93663	-324	-324	31.3404
SRX11525492	Sumo1	ES cells	61647	2397/4398	1632/93663	-324	-324	31.2796
SRX17024519	Smc1a	ES cells	18529	1282/4398	875/93663	-324	-324	31.2027
SRX3038018	Sox2	iPS cells	10067	641/4398	438/93663	-324	-324	31.1671
SRX7205309	Rnf2	ES cells	38090	2857/4398	1954/93663	-324	-324	31.1386
SRX16101712	Smarca4	ES cells	16469	1027/4398	704/93663	-324	-324	31.0678
SRX6706334	Rnf2	ES cells	9028	652/4398	448/93663	-324	-324	30.9943
SRX213808	Nanog	ES cells	23652	1457/4398	1005/93663	-324	-324	30.875
SRX5817865	Zfp281	ES cells	11502	765/4398	528/93663	-324	-324	30.8561
SRX236476	Pou5f1	ES cells	24884	1660/4398	1146/93663	-324	-324	30.8487
SRX7205307	Rnf2	ES cells	25605	1909/4398	1323/93663	-324	-324	30.7297
SRX581836	Trim28	ES cells	31609	509/4398	353/93663	-324	-324	30.7083
SRX4596007	Pou5f1	ES cells	11552	380/4398	264/93663	-324	-324	30.6544
SRX3038014	Pou5f1	iPS cells	7231	384/4398	267/93663	-324	-324	30.629
SRX4506772	Arid1a	ES cells	13552	865/4398	603/93663	-324	-324	30.55
SRX319549	Myc	ES cells	9475	530/4398	370/93663	-324	-324	30.5061
SRX3430144	Rad21	ES cells	25698	1794/4398	1253/93663	-324	-324	30.4919
SRX14394940	Sumo2	ES cells	27535	514/4398	359/93663	-324	-324	30.4917
SRX13439102	Smc1a	ES cells	28626	1865/4398	1304/93663	-324	-324	30.4589
SRX11221882	Esrrb	ES cells	52888	3723/4398	2610/93663	-324	-324	30.3784
SRX3038021	Sox2	iPS cells	11157	655/4398	460/93663	-324	-324	30.3247
SRX13439132	Taf3	ES cells	33354	3427/4398	2415/93663	-324	-324	30.2211
SRX15831062	Suz12	ES cells	8185	523/4398	369/93663	-324	-324	30.1848
SRX11221884	Esrrb	ES cells	52146	3719/4398	2624/93663	-324	-324	30.1839
SRX1829031	Suz12	ES cells	10830	614/4398	434/93663	-324	-324	30.1295
SRX4887838	Hdac3	ES cells	15267	924/4398	655/93663	-324	-324	30.043
SRX11540092	Sox2	EpiLC	8687	462/4398	328/93663	-324	-324	29.9972
SRX385377	GFP	ES cells	43330	3514/4398	2496/93663	-324	-324	29.9827
SRX499112	Ep300	ES cells	29471	1956/4398	1390/93663	-324	-324	29.9686
SRX9101847	Ezh2	ES cells	15440	937/4398	667/93663	-324	-324	29.9176
SRX084804	Epitope tags	mESC derived neural cells	10880	505/4398	360/93663	-324	-324	29.8746
SRX1080389	Smad2	Embryoid Bodies	9540	499/4398	356/93663	-324	-324	29.8513
SRX248286	Nanog	ES cells	121325	3617/4398	2588/93663	-324	-324	29.7644
SRX11677018	Ssrp1	ES cells	44983	3546/4398	2538/93663	-324	-324	29.755
SRX9195305	Pou5f1	ES cells	6875	419/4398	300/93663	-324	-324	29.7444
SRX1342337	Sox2	ES cells	10790	567/4398	406/93663	-324	-324	29.742
SRX837355	Myod1	P19	19768	769/4398	551/93663	-324	-324	29.7227
SRX3898501	Brd4	ES cells	51110	3681/4398	2640/93663	-324	-324	29.6944
SRX6827273	Klf4	ES cells	84631	3875/4398	2780/93663	-324	-324	29.6852
SRX8818293	Epitope tags	EpiLC	10744	724/4398	521/93663	-324	-324	29.5947
SRX9641208	Ctnnb1	EpiLC	7233	371/4398	267/93663	-324	-324	29.5921
SRX1831962	Suz12	ES cells	9179	548/4398	395/93663	-324	-324	29.5458
SRX10437500	Ctcf	ES cells	57263	3532/4398	2550/93663	-324	-324	29.4981
SRX4594914	Sox2	ES cells	12311	634/4398	458/93663	-324	-324	29.4806
SRX13439111	Ctcf	ES cells	28818	1985/4398	1434/93663	-324	-324	29.4798
SRX466436	Epitope tags	ES cells	6240	458/4398	332/93663	-324	-324	29.3792
SRX4594911	Pou5f1	ES cells	10617	608/4398	441/93663	-324	-324	29.3615
SRX14812517	Trim24	ES cells	41881	1599/4398	1162/93663	-324	-324	29.3059
SRX8517908	Esrrb	ES cells	6437	422/4398	308/93663	-324	-324	29.1793
SRX16989254	Nanog	ES cells	11661	493/4398	362/93663	-324	-324	29.0036
SRX3038017	Sox2	iPS cells	7607	437/4398	321/93663	-324	-324	28.9927
SRX1539895	Rnf2	ES cells	9659	448/4398	330/93663	-324	-324	28.9119
SRX5054328	GFP	ES cells	18055	1118/4398	825/93663	-324	-324	28.8603
SRX8994342	Pou5f1	ES cells	8901	417/4398	308/93663	-324	-324	28.8336
SRX499115	Pou5f1	ES cells	39317	2326/4398	1719/93663	-324	-324	28.8169
SRX837354	Myod1	P19	20278	783/4398	579/93663	-324	-324	28.8002
SRX5374730	Pou5f1	ES cells	11446	668/4398	495/93663	-324	-324	28.7398
SRX20248703	Epitope tags	ES cells	10145	551/4398	410/93663	-324	-324	28.6207
SRX13439104	Smc1a	ES cells	28218	1643/4398	1226/93663	-324	-324	28.5404
SRX8003647	Epitope tags	ES cells	13846	733/4398	547/93663	-324	-324	28.5384
SRX1670207	Rad21	ES cells	42038	2854/4398	2132/93663	-324	-324	28.5088
SRX8994343	Pou5f1	ES cells	11850	534/4398	399/93663	-324	-324	28.5024
SRX977381	Pou5f1	iPS cells	12323	631/4398	472/93663	-324	-324	28.4708
SRX4887836	Hdac3	ES cells	8647	491/4398	368/93663	-324	-324	28.4149
SRX18040252	Sox2	ES cells	14963	1037/4398	778/93663	-324	-324	28.3865
SRX15888975	Epitope tags	ES cells	47539	2708/4398	2038/93663	-324	-324	28.2981
SRX1342339	Sox2	ES cells	11050	525/4398	396/93663	-324	-324	28.2343
SRX8736759	Kmt2d	ES cells	35126	2173/4398	1642/93663	-324	-324	28.1838
SRX319556	Nr0b1	ES cells	16827	877/4398	663/93663	-324	-324	28.1708
SRX12204131	Ctcf	ES cells	19996	1233/4398	933/93663	-324	-324	28.1445
SRX9641160	Ctnnb1	ES cells	12466	636/4398	484/93663	-324	-324	27.985
SRX10895580	Rnf2	ES cells	7994	547/4398	417/93663	-324	-324	27.936
SRX5054318	Epitope tags	ES cells	14360	797/4398	608/93663	-324	-324	27.9169
SRX499130	Otx2	EpiLC	40288	2405/4398	1843/93663	-324	-324	27.7909
SRX8517932	Sox2	ES cells	9556	471/4398	361/93663	-324	-324	27.786
SRX15057961	Mesp1	mESCs, differentiated	14612	746/4398	572/93663	-324	-324	27.7751
SRX003866	Pou5f1	ES cells	13135	661/4398	507/93663	-324	-324	27.7656
SRX7175345	Ep300	ES cells	13986	686/4398	527/93663	-324	-324	27.7221
SRX5600782	Setd1a	ES cells	54948	3728/4398	2864/93663	-324	-324	27.7214
SRX1540623	Zfp281	ES cells	84878	3384/4398	2600/93663	-324	-324	27.7185
SRX4298475	Nanog	ES cells	11527	539/4398	415/93663	-324	-324	27.6601
SRX3200452	Runx1	mESC derived haemogenic endothelium	53575	2751/4398	2123/93663	-324	-324	27.5965
SRX12124818	Rnf2	PGCLC	6645	390/4398	301/93663	-324	-324	27.5938
SRX16101721	Smarca4	ES cells	9884	568/4398	439/93663	-324	-324	27.5548
SRX4054008	Neurog2	mESCs, differentiated	55259	2760/4398	2137/93663	-324	-324	27.5054
SRX10560008	Smc1a	ES cells	20646	1211/4398	938/93663	-324	-324	27.495
SRX15888979	Epitope tags	ES cells	50528	2775/4398	2151/93663	-324	-324	27.4749
SRX12124914	Rad21	Germline stem cell-like cells	16838	968/4398	752/93663	-324	-324	27.4139
SRX950710	Pou5f1	iPS cells	8684	449/4398	349/93663	-324	-324	27.3989
SRX1706938	Neurog2	mESCs, differentiated	55311	2757/4398	2146/93663	-324	-324	27.3602
SRX13439112	Ctcf	ES cells	29643	1907/4398	1488/93663	-324	-324	27.2936
SRX17024520	Smc1a	ES cells	10916	707/4398	552/93663	-324	-324	27.2768
SRX022688	Smc1a	ES cells	10768	684/4398	535/93663	-324	-324	27.228
SRX14601076	Rad21	ES cells	24821	1699/4398	1329/93663	-324	-324	27.2258
SRX6032074	Sox2	ES cells	27338	1467/4398	1153/93663	-324	-324	27.0965
SRX390397	Tcf12	mESC derived endodermal cells	78682	3313/4398	2606/93663	-324	-324	27.0745
SRX554633	Suz12	ES cells	18381	816/4398	643/93663	-324	-324	27.0266
SRX4054015	Ascl1	Embryoid Bodies	12940	675/4398	533/93663	-324	-324	26.9705
SRX4054006	Ascl1	Embryoid Bodies	21804	1205/4398	953/93663	-324	-324	26.9282
SRX13228158	Sox2	ES cells	25138	1588/4398	1258/93663	-324	-324	26.8833
SRX390394	Tcf12	ES cells	91580	3825/4398	3037/93663	-324	-324	26.8225
SRX2831314	Sumo1	ES cells	37673	798/4398	634/93663	-324	-324	26.8057
SRX5729492	Twist1	Embryoid Bodies	38790	2077/4398	1651/93663	-324	-324	26.7918
SRX9195321	Pou5f1	ES cells	10004	542/4398	431/93663	-324	-324	26.7815
SRX5023731	Pou5f1	ES cells	13286	709/4398	565/93663	-324	-324	26.7246
SRX1410924	Zic2	EpiSC	64470	2852/4398	2273/93663	-324	-324	26.7216
SRX5242841	Rnf2	ES cells	23122	2109/4398	1681/93663	-324	-324	26.7191
SRX3038046	Sox2	iPS cells	24844	1015/4398	811/93663	-324	-324	26.6537
SRX12124915	Rnf2	Germline stem cell-like cells	7585	399/4398	320/93663	-324	-324	26.5544
SRX5578682	Biotin	ES cells	22321	1097/4398	880/93663	-324	-324	26.5483
SRX7175344	Ep300	ES cells	13719	663/4398	533/93663	-324	-324	26.491
SRX1706948	Pou5f1	mESCs, differentiated	8193	384/4398	309/93663	-324	-324	26.4658
SRX10560009	Smc1a	ES cells	56028	2870/4398	2315/93663	-324	-324	26.4024
SRX20248697	Epitope tags	ES cells	8450	440/4398	355/93663	-324	-324	26.3959
SRX4594903	Smarca4	ES cells	10565	492/4398	397/93663	-324	-324	26.3929
SRX554628	Suz12	ES cells	22677	1075/4398	869/93663	-324	-324	26.3452
SRX4394644	Dppa2	iPS cells	24091	817/4398	662/93663	-324	-324	26.2831
SRX6454761	GFP	ES cells	8705	521/4398	423/93663	-324	-324	26.2307
SRX4054020	Ebf2	Embryoid Bodies	21632	1030/4398	837/93663	-324	-324	26.2074
SRX8517905	Esrrb	ES cells	8323	481/4398	391/93663	-324	-324	26.1988
SRX4394630	Dppa2	ES cells	29057	834/4398	678/93663	-324	-324	26.1969
SRX1410919	Zic2	EpiSC	59689	2613/4398	2126/93663	-324	-324	26.1751
SRX6032073	Sox2	ES cells	21190	1078/4398	882/93663	-324	-324	26.0293
SRX14394945	Trim28	ES cells	28750	613/4398	504/93663	-324	-324	25.9026
SRX2894853	Dr1	ES cells	72537	3128/4398	2573/93663	-324	-324	25.8905
SRX15888976	Epitope tags	ES cells	49324	2536/4398	2090/93663	-324	-324	25.8414
SRX14601075	Rad21	ES cells	24617	1557/4398	1287/93663	-324	-324	25.7646
SRX1670187	Rad21	ES cells	31587	1782/4398	1474/93663	-324	-324	25.7468
SRX16101717	Smarca4	ES cells	10480	608/4398	503/93663	-324	-324	25.7424
SRX4887837	Hdac3	ES cells	12888	643/4398	532/93663	-324	-324	25.7402
SRX4054012	Epitope tags	Embryoid Bodies	26371	1317/4398	1092/93663	-324	-324	25.6848
SRX14394939	Sumo2	ES cells	29618	481/4398	399/93663	-324	-324	25.6735
SRX6032061	Sox2	ES cells	22124	1142/4398	949/93663	-324	-324	25.6279
SRX1058358	Sox2	mESC derived neural cells	16379	632/4398	526/93663	-324	-324	25.5885
SRX11221881	Esrrb	ES cells	54558	2977/4398	2479/93663	-324	-324	25.575
SRX5023732	Pou5f1	ES cells	12752	620/4398	518/93663	-324	-324	25.4903
SRX977369	Epitope tags	iPSC intermediates	72094	3235/4398	2705/93663	-324	-324	25.4695
SRX390392	Tcf12	ES cells	83236	3492/4398	2923/93663	-324	-324	25.4424
SRX2752334	Kmt2c	ES cells	37206	1968/4398	1649/93663	-324	-324	25.4166
SRX4167129	Esrrb	ES cells	14202	646/4398	542/93663	-324	-324	25.3832
SRX7529876	Rnf2	ES cells	11058	647/4398	543/93663	-324	-324	25.3757
SRX1706960	Neurog2	mESCs, differentiated	8316	417/4398	350/93663	-324	-324	25.3735
SRX13439114	Ctcf	ES cells	41452	2521/4398	2119/93663	-324	-324	25.337
SRX6767993	Eed	ES cells	7973	410/4398	345/93663	-324	-324	25.3092
SRX7175348	Ep300	ES cells	14376	703/4398	594/93663	-324	-324	25.2047
SRX9641171	Tcf3	ES cells	9854	439/4398	371/93663	-324	-324	25.2002
SRX7176631	Ssrp1	ES cells	11021	505/4398	427/93663	-324	-324	25.187
SRX236477	Sox2	ES cells	11136	525/4398	444/93663	-324	-324	25.1819
SRX084803	Olig2	mESC derived neural cells	16543	614/4398	520/93663	-324	-324	25.1465
SRX8994336	Nanog	ES cells	45845	2294/4398	1944/93663	-324	-324	25.131
SRX5027341	Pcgf2	ES cells	9469	656/4398	557/93663	-324	-324	25.082
SRX14394943	Trim28	ES cells	31860	754/4398	642/93663	-324	-324	25.012
SRX977374	Pou5f1	iPSC intermediates	51277	1710/4398	1459/93663	-324	-324	24.9605
SRX8517924	Nanog	ES cells	10692	478/4398	408/93663	-324	-324	24.9506
SRX499142	Pou5f1	ES cells	27627	1098/4398	940/93663	-324	-324	24.8764
SRX6879008	Zic3	ES cells	72006	2843/4398	2435/93663	-324	-324	24.8651
SRX8517928	Pou5f1	ES cells	9122	396/4398	340/93663	-324	-324	24.8044
SRX6768032	Rnf2	ES cells	17767	1295/4398	1114/93663	-324	-324	24.757
SRX2440075	Epitope tags	ES cells	11331	419/4398	361/93663	-324	-324	24.7184
SRX175894	GFP	ES cells	22593	1103/4398	951/93663	-324	-324	24.7006
SRX11221883	Esrrb	ES cells	63697	3258/4398	2814/93663	-324	-324	24.657
SRX003865	Nanog	ES cells	9319	441/4398	381/93663	-324	-324	24.6505
SRX4017943	Pou5f1	ES cells	27241	905/4398	782/93663	-324	-324	24.6465
SRX16815350	Pou5f1	ES cells	92358	3904/4398	3380/93663	-324	-324	24.5983
SRX8994340	Sox2	ES cells	11297	522/4398	452/93663	-324	-324	24.5949
SRX003864	Nanog	ES cells	9163	430/4398	373/93663	-324	-324	24.5512
SRX055106	Epitope tags	ES cells	15818	560/4398	486/93663	-324	-324	24.5394
SRX10560010	Smc1a	ES cells	59627	2588/4398	2247/93663	-324	-324	24.5287
SRX4054013	Epitope tags	Embryoid Bodies	46921	2243/4398	1950/93663	-324	-324	24.4967
SRX6767994	Eed	ES cells	8320	450/4398	392/93663	-324	-324	24.4478
SRX16736246	Epitope tags	ES cells	9459	408/4398	356/93663	-324	-324	24.4075
SRX499127	Pou5f1	EpiLC	28313	1376/4398	1203/93663	-324	-324	24.3593
SRX13228088	Sox2	ES cells	38985	2313/4398	2025/93663	-324	-324	24.3256
SRX4167130	Esrrb	ES cells	16012	712/4398	625/93663	-324	-324	24.2612
SRX1141346	Nanog	ES cells	14664	634/4398	557/93663	-324	-324	24.2408
SRX868177	Fgfr1	ES cells	151728	1219/4398	1071/93663	-324	-324	24.2397
SRX4054027	Pou3f2	mESCs, differentiated	21047	853/4398	750/93663	-324	-324	24.2215
SRX1831960	Suz12	ES cells	8660	441/4398	388/93663	-324	-324	24.2058
SRX14601062	Pds5a	ES cells	16590	970/4398	854/93663	-324	-324	24.1895
SRX5023726	Nanog	ES cells	12068	505/4398	446/93663	-324	-324	24.114
SRX1670195	Rad21	ES cells	37695	2056/4398	1816/93663	-324	-324	24.1113
SRX12204127	Smc1a	ES cells	7425	472/4398	417/93663	-324	-324	24.1056
SRX16815349	Pou5f1	ES cells	94578	3910/4398	3463/93663	-324	-324	24.0457
SRX4054029	Ebf2	mESCs, differentiated	41995	1801/4398	1596/93663	-324	-324	24.0322
SRX9195304	Pou5f1	ES cells	10346	546/4398	484/93663	-324	-324	24.0248
SRX10710574	Rnf2	ES cells	9506	520/4398	461/93663	-324	-324	24.0223
SRX6032062	Sox2	ES cells	30643	1543/4398	1373/93663	-324	-324	23.9336
SRX4594906	Esrrb	ES cells	11124	485/4398	432/93663	-324	-324	23.9095
SRX4671045	Epitope tags	ES cells	23093	593/4398	529/93663	-324	-324	23.8733
SRX5023733	Pou5f1	ES cells	17385	833/4398	746/93663	-324	-324	23.7804
SRX6098707	Jarid2	ES cells	16845	816/4398	735/93663	-324	-324	23.6437
SRX5023709	Esrrb	ES cells	17496	739/4398	666/93663	-324	-324	23.6311
SRX8073477	Zfp281	ES cells	9491	548/4398	494/93663	-324	-324	23.6247
SRX18040248	Sox2	ES cells	33217	1915/4398	1731/93663	-324	-324	23.5605
SRX7176626	Ssrp1	ES cells	14557	451/4398	409/93663	-324	-324	23.4837
SRX8994337	Nanog	ES cells	53429	2528/4398	2294/93663	-324	-324	23.4691
SRX1670191	Rad21	ES cells	45075	2338/4398	2124/93663	-324	-324	23.4424
SRX18040244	Sox2	ES cells	32632	1936/4398	1761/93663	-324	-324	23.4131
SRX8994344	Pou5f1	ES cells	17849	703/4398	641/93663	-324	-324	23.3566
SRX8994341	Sox2	ES cells	13572	615/4398	561/93663	-324	-324	23.3467
SRX1829035	Suz12	ES cells	12873	679/4398	622/93663	-324	-324	23.2484
SRX4594905	Esrrb	ES cells	11723	501/4398	459/93663	-324	-324	23.2454
SRX3827067	Ctcf	ES cells	9085	532/4398	488/93663	-324	-324	23.2169
SRX4158594	Esrrb	ES cells	10502	467/4398	429/93663	-324	-324	23.1831
SRX8642887	Rad21	ES cells	38433	1912/4398	1757/93663	-324	-324	23.1755
SRX14812518	Trim24	ES cells	39072	1138/4398	1050/93663	-324	-324	23.0816
SRX4054010	Neurog2	mESCs, differentiated	32109	1405/4398	1300/93663	-324	-324	23.0168
SRX14812516	Trim24	ES cells	25151	743/4398	688/93663	-324	-324	22.9992
SRX7175349	Ep300	ES cells	15195	709/4398	658/93663	-324	-324	22.9474
SRX977368	Epitope tags	iPSC intermediates	84222	3354/4398	3118/93663	-324	-324	22.9087
SRX3038024	Sox2	iPS cells	14411	618/4398	575/93663	-324	-324	22.8894
SRX6831871	Rad21	ES cells	42492	2181/4398	2031/93663	-324	-324	22.8696
SRX6831870	Rad21	ES cells	55799	2826/4398	2634/93663	-324	-324	22.8491
SRX8994345	Pou5f1	ES cells	21981	866/4398	808/93663	-324	-324	22.8255
SRX4054016	Ascl1	Embryoid Bodies	22961	986/4398	921/93663	-324	-324	22.7998
SRX5125624	Smc1a	ES cells	13118	705/4398	664/93663	-324	-324	22.6117
SRX5578681	Biotin	ES cells	15721	636/4398	602/93663	-324	-324	22.4995
SRX5054322	Epitope tags	ES cells	17979	828/4398	784/93663	-324	-324	22.492
SRX14601061	Pds5a	ES cells	10773	603/4398	571/93663	-324	-324	22.4902
SRX6032060	Sox2	ES cells	35998	1680/4398	1591/93663	-324	-324	22.4881
SRX16101713	Smarca4	ES cells	17472	858/4398	813/93663	-324	-324	22.4755
SRX520480	Rxra	F9	13257	619/4398	587/93663	-324	-324	22.4577
SRX14601057	Pds5a	ES cells	15678	863/4398	820/93663	-324	-324	22.4135
SRX977366	Epitope tags	iPSC intermediates	78207	2534/4398	2416/93663	-324	-324	22.3369
SRX5023744	Sox2	ES cells	20516	815/4398	778/93663	-324	-324	22.3096
SRX9295986	Epitope tags	ES cells	32305	1450/4398	1388/93663	-324	-324	22.248
SRX13332951	Kdm6a	ES cells	43029	2172/4398	2090/93663	-324	-324	22.1323
SRX7423745	Mtf2	ES cells	16858	1167/4398	1124/93663	-324	-324	22.1115
SRX5858855	Smc1a	ES cells	19808	882/4398	850/93663	-324	-324	22.0985
SRX3430140	Rad21	ES cells	18135	909/4398	877/93663	-324	-324	22.0738
SRX4054019	Ebf2	Embryoid Bodies	32571	1346/4398	1299/93663	-324	-324	22.0673
SRX404068	Utf1	ES cells	69455	3495/4398	3377/93663	-324	-324	22.0409
SRX188829	Mafk	ES cells	17898	626/4398	605/93663	-324	-324	22.036
SRX2440050	Smc1a	EpiSC	12778	583/4398	564/93663	-324	-324	22.0142
SRX13332957	Kdm6a	ES cells	48059	2399/4398	2324/93663	-324	-324	21.984
SRX190466	Epitope tags	mESC derived neural cells	16272	730/4398	708/93663	-324	-324	21.9585
SRX8003644	Epitope tags	ES cells	13038	608/4398	590/93663	-324	-324	21.9465
SRX11600046	Nanog	ES cells	40297	1784/4398	1743/93663	-324	-324	21.7977
SRX4403305	Chd4	mESC derived neural cells	11534	408/4398	399/93663	-324	-324	21.7771
SRX5054320	Epitope tags	ES cells	19349	905/4398	886/93663	-324	-324	21.7534
SRX4727152	Rnf2	ES cells	8260	579/4398	568/93663	-324	-324	21.7092
SRX4980239	Hoxb1	ES cells	46452	1241/4398	1218/93663	-324	-324	21.6989
SRX7416188	Hoxd9	Embryoid Bodies	32910	1246/4398	1225/93663	-324	-324	21.6618
SRX5054321	Epitope tags	ES cells	19852	913/4398	899/93663	-324	-324	21.6284
SRX16038359	Esrrb	ES cells	22305	920/4398	906/93663	-324	-324	21.6258
SRX1421937	Trim28	ES cells	39897	562/4398	554/93663	-324	-324	21.6043
SRX9695051	Ctcf	iPS cells	9469	570/4398	563/93663	-324	-324	21.5615
SRX6784058	Nanog	ES cells	13894	573/4398	566/93663	-324	-324	21.5601
SRX554631	Suz12	ES cells	18628	640/4398	633/93663	-324	-324	21.5322
SRX11600050	Nanog	ES cells	56925	2381/4398	2358/93663	-324	-324	21.5045
SRX10710598	Suz12	ES cells	28709	1520/4398	1510/93663	-324	-324	21.4378
SRX6032072	Sox2	ES cells	35219	1527/4398	1521/93663	-324	-324	21.3807
SRX11600045	Nanog	ES cells	30547	1300/4398	1300/93663	-324	-324	21.2967
SRX3738839	Jarid2	ES cells	10992	452/4398	452/93663	-324	-324	21.2967
SRX7653548	Nanog	ES cells	97287	3782/4398	3794/93663	-324	-324	21.2294
SRX2612050	Nanog	ES cells	14949	667/4398	670/93663	-324	-324	21.2014
SRX520463	Rxra	F9	14858	637/4398	642/93663	-324	-324	21.1309
SRX9486379	Sox2	ES cells	107308	3771/4398	3804/93663	-324	-324	21.112
SRX554626	Suz12	ES cells	19575	678/4398	684/93663	-324	-324	21.1099
SRX1670199	Rad21	ES cells	35193	1670/4398	1689/93663	-324	-324	21.0572
SRX8003643	Epitope tags	ES cells	18541	845/4398	855/93663	-324	-324	21.0476
SRX2612051	Nanog	ES cells	14817	648/4398	657/93663	-324	-324	21.005
SRX10560011	Smc1a	ES cells	88555	3217/4398	3270/93663	-324	-324	20.9515
SRX14601058	Pds5a	ES cells	17386	904/4398	920/93663	-324	-324	20.9263
SRX8844235	Olig2	EpiSC	69664	3154/4398	3211/93663	-324	-324	20.9187
SRX1670211	Rad21	ES cells	34052	1567/4398	1596/93663	-324	-324	20.9098
SRX6032066	Esrrb	ES cells	19028	819/4398	835/93663	-324	-324	20.8886
SRX8844234	Olig2	EpiSC	70625	3152/4398	3217/93663	-324	-324	20.8664
SRX9641172	Tcf3	ES cells	16088	617/4398	634/93663	-324	-324	20.7257
SRX499129	Otx2	EpiLC	39809	1708/4398	1759/93663	-324	-324	20.6793
SRX029859	Tet1	ES cells	36358	1156/4398	1191/93663	-324	-324	20.6709
SRX9345864	Tfcp2l1	ES cells	38299	1399/4398	1442/93663	-324	-324	20.6617
SRX5729491	Twist1	Embryoid Bodies	47377	1882/4398	1940/93663	-324	-324	20.66
SRX15888978	Epitope tags	ES cells	82105	3466/4398	3573/93663	-324	-324	20.659
SRX499117	Otx2	ES cells	25986	1327/4398	1368/93663	-324	-324	20.6584
SRX6032059	Sox2	ES cells	36634	1583/4398	1636/93663	-324	-324	20.6068
SRX2423281	GFP	ES cells	10419	539/4398	558/93663	-324	-324	20.5716
SRX248285	Tbx3	Embryoid Bodies	36246	580/4398	601/93663	-324	-324	20.5526
SRX9567794	Ctcf	ES cells	13432	597/4398	619/93663	-324	-324	20.5398
SRX2752337	Kmt2c	ES cells	67677	3285/4398	3408/93663	-324	-324	20.5281
SRX15888985	Epitope tags	ES cells	48910	2063/4398	2148/93663	-324	-324	20.454
SRX11600049	Nanog	ES cells	61303	2464/4398	2575/93663	-324	-324	20.3787
SRX897941	Sox2	iPSC intermediates	11315	438/4398	458/93663	-324	-324	20.3667
SRX6003869	Tbp	ES cells	76475	3280/4398	3431/93663	-324	-324	20.3594
SRX085109	Smc1a	ES cells	42811	1659/4398	1751/93663	-324	-324	20.1778
SRX015831	Suz12	ES cells	14713	637/4398	674/93663	-324	-324	20.1276
SRX13332919	Dnttip1	ES cells	47966	2638/4398	2792/93663	-324	-324	20.122
SRX6768033	Rnf2	ES cells	16715	999/4398	1058/93663	-324	-324	20.1091
SRX2609731	Btaf1	ES cells	107513	2701/4398	2866/93663	-324	-324	20.0706
SRX1704897	Nanog	ES cells	43706	1735/4398	1841/93663	-324	-324	20.0705
SRX5023711	Esrrb	ES cells	14158	520/4398	552/93663	-324	-324	20.0621
SRX4887839	Hdac3	ES cells	19330	841/4398	896/93663	-324	-324	19.9894
SRX8517957	Esrrb	ES cells	12659	498/4398	531/93663	-324	-324	19.9732
SRX2894851	Btaf1	ES cells	107004	2730/4398	2913/93663	-324	-324	19.9588
SRX15888984	Epitope tags	ES cells	46287	1885/4398	2014/93663	-324	-324	19.9326
SRX6768018	Rnf2	ES cells	13835	895/4398	958/93663	-324	-324	19.8962
SRX6003871	Tbp	ES cells	74263	3194/4398	3419/93663	-324	-324	19.8952
SRX1670215	Rad21	ES cells	35058	1536/4398	1652/93663	-324	-324	19.8013
SRX8003646	Epitope tags	ES cells	33160	1596/4398	1717/93663	-324	-324	19.7959
SRX10710596	Suz12	ES cells	17262	751/4398	808/93663	-324	-324	19.7944
SRX520469	Rxra	F9	15000	575/4398	619/93663	-324	-324	19.7829
SRX13439103	Smc1a	ES cells	19112	799/4398	861/93663	-324	-324	19.7632
SRX10710568	Rnf2	ES cells	25398	670/4398	723/93663	-324	-324	19.7356
SRX5023710	Esrrb	ES cells	12971	438/4398	474/93663	-324	-324	19.6793
SRX14046358	Ctcf	mESC derived neural cells	14364	669/4398	724/93663	-324	-324	19.6789
SRX6768060	Rnf2	ES cells	12597	736/4398	797/93663	-324	-324	19.6667
SRX15888982	Epitope tags	ES cells	31807	1209/4398	1310/93663	-324	-324	19.6548
SRX2236922	Nanog	ES cells	13449	525/4398	572/93663	-324	-324	19.5468
SRX15888981	Epitope tags	ES cells	36995	1423/4398	1551/93663	-324	-324	19.5392
SRX114683	Myod1	P19	26161	735/4398	806/93663	-324	-324	19.4207
SRX8003645	Epitope tags	ES cells	31524	1522/4398	1671/93663	-324	-324	19.3977
SRX12260418	Ctcf	mESC derived erythroid cells	31738	1238/4398	1361/93663	-324	-324	19.372
SRX17066024	Ctcf	mESC derived erythroid cells	31738	1238/4398	1361/93663	-324	-324	19.372
SRX8517927	Pou5f1	ES cells	14203	520/4398	573/93663	-324	-324	19.3269
SRX8517926	Pou5f1	ES cells	13611	461/4398	508/93663	-324	-324	19.3264
SRX13332921	Dnttip1	ES cells	53854	2786/4398	3084/93663	-324	-324	19.2389
SRX14812519	Trim24	ES cells	29977	754/4398	835/93663	-324	-324	19.2308
SRX022689	Smc1a	ES cells	29866	1175/4398	1304/93663	-324	-324	19.1899
SRX7141149	Epitope tags	ES cells	20143	688/4398	764/93663	-324	-324	19.1782
SRX4004792	Esrrb	ES cells	17296	625/4398	695/93663	-324	-324	19.1517
SRX6003867	Tbp	ES cells	76153	3286/4398	3656/93663	-324	-324	19.1414
SRX022691	Smc3	ES cells	9649	447/4398	498/93663	-324	-324	19.1157
SRX1670223	Rad21	ES cells	30728	1457/4398	1624/93663	-324	-324	19.1067
SRX9295987	Epitope tags	ES cells	38869	1598/4398	1783/93663	-324	-324	19.087
SRX9326769	Smc3	ES cells	9603	448/4398	501/93663	-324	-324	19.0438
SRX4735796	Srf	iPS cells	10369	458/4398	513/93663	-324	-324	19.0135
[truncated: 4,787 more rows]

## Sheet: Non-accessible short fragment
Nonaccessible short fragment nucleosome vs nonaccessible canonical nucleosome
ID	Antigen	Cell	Num of Peaks	Overlaps with Dataset	Overlaps with Control	Log P-val	Log Q-val	Fold Enrichment
SRX10437499	Ctcf	ES cells	86320	3116/60211	3463/93663	-42.8684	-39.0376	1.39971
SRX10437504	Ctcf	ES cells	91749	3200/60211	3599/93663	-41.3293	-37.7995	1.38312
SRX10437501	Ctcf	ES cells	88820	3195/60211	3597/93663	-40.9953	-37.6416	1.38173
SRX10437497	Ctcf	ES cells	96719	3421/60211	3937/93663	-38.7405	-35.5117	1.3517
SRX10437503	Ctcf	ES cells	99282	3611/60211	4248/93663	-35.7125	-32.5806	1.32232
SRX10437498	Ctcf	ES cells	97939	3504/60211	4110/93663	-35.3025	-32.2498	1.32622
SRX10437506	Ctcf	ES cells	64330	2426/60211	2681/93663	-34.3065	-31.3208	1.40762
SRX5252263	Ctcf	ES cells	68481	2501/60211	2826/93663	-31.3179	-28.4247	1.37668
SRX14210124	Setd1a	ES cells	11706	643/60211	498/93663	-31.3013	-28.4247	2.00851
SRX10437496	Ctcf	ES cells	84751	3156/60211	3710/93663	-31.2542	-28.4234	1.32329
SRX5252265	Ctcf	ES cells	69749	2501/60211	2845/93663	-30.1858	-27.3963	1.36749
SRX6831864	Wiz	ES cells	74913	2346/60211	2651/93663	-29.3721	-26.6204	1.37661
SRX13408979	Ctcf	Embryoid Bodies	64542	2252/60211	2530/93663	-29.1642	-26.4473	1.38465
SRX10437505	Ctcf	ES cells	74867	2946/60211	3464/93663	-29.1315	-26.4468	1.32296
SRX8994330	Ctcf	ES cells	75349	2504/60211	2868/93663	-29.0459	-26.3911	1.35815
SRX5600784	Setd1a	ES cells	42484	1715/60211	1832/93663	-28.676	-26.0493	1.45623
SRX12124781	Ctcf	EpiLC	72379	2544/60211	2931/93663	-28.4647	-25.8643	1.35019
SRX10641338	Ctcf	ES cells	39283	1631/60211	1730/93663	-28.2173	-25.6417	1.46656
SRX5125621	Ctcf	ES cells	78087	2692/60211	3136/93663	-28.1737	-25.6216	1.33534
SRX10437502	Ctcf	ES cells	58853	2361/60211	2697/93663	-27.8079	-25.2781	1.36178
SRX10641337	Ctcf	ES cells	45897	1819/60211	1980/93663	-27.7567	-25.2481	1.42909
SRX5858848	Ctcf	ES cells	48771	2077/60211	2323/93663	-27.539	-25.0506	1.39085
SRX5292073	Ctcf	ES cells	67622	2441/60211	2811/93663	-27.3968	-24.9277	1.35083
SRX11237511	Ctcf	ES cells	77999	2862/60211	3386/93663	-27.161	-24.7104	1.31485
SRX8994333	Ctcf	ES cells	79478	2607/60211	3040/93663	-27.1132	-24.6803	1.33401
SRX3430136	Rad21	ES cells	48628	1861/60211	2046/93663	-27.0242	-24.6146	1.41492
SRX11237529	Ctcf	ES cells	93044	3194/60211	3844/93663	-27.0116	-24.6146	1.29254
DRX013326	Kdm1a	EpiSC	42811	1023/60211	978/93663	-26.9983	-24.6146	1.62716
SRX12124782	Ctcf	EpiLC	83070	2823/60211	3338/93663	-26.8768	-24.5084	1.31558
SRX11237505	Ctcf	ES cells	90215	3227/60211	3895/93663	-26.7183	-24.3732	1.28879
SRX11237523	Ctcf	ES cells	85735	3114/60211	3740/93663	-26.7071	-24.3732	1.29521
SRX8994331	Ctcf	ES cells	80956	2643/60211	3097/93663	-26.6989	-24.3732	1.32754
SRX19838669	Setd1a	ES cells	5724	299/60211	168/93663	-26.5923	-24.28	2.76856
SRX5858838	Ctcf	ES cells	67489	2211/60211	2518/93663	-26.5126	-24.2132	1.36592
SRX11237535	Ctcf	ES cells	91517	3200/60211	3865/93663	-26.3813	-24.0945	1.28793
SRX4167115	Med1	ES cells	27402	1100/60211	1080/93663	-26.304	-24.0295	1.58439
SRX3430133	Ctcf	ES cells	68390	2511/60211	2926/93663	-26.2511	-23.9885	1.33495
SRX5600783	Setd1a	ES cells	41755	1916/60211	2131/93663	-26.2102	-23.9591	1.39863
SRX12124845	Ctcf	PGCLC	74745	2578/60211	3018/93663	-26.1444	-23.9046	1.32879
SRX8994332	Ctcf	ES cells	78378	2550/60211	2982/93663	-26.091	-23.8622	1.33022
SRX19147917	Ctcf	EpiLC	54315	1889/60211	2098/93663	-26.0377	-23.8196	1.40061
SRX085109	Smc1a	ES cells	42811	1624/60211	1751/93663	-25.9606	-23.753	1.44275
SRX12124846	Ctcf	PGCLC	83044	2780/60211	3298/93663	-25.879	-23.6816	1.31125
SRX6639877	Setd1a	ES cells	23271	1113/60211	1102/93663	-25.7966	-23.6092	1.57111
SRX5858847	Ctcf	ES cells	50907	2086/60211	2363/93663	-25.768	-23.5904	1.37323
SRX342720	Kmt2d	Embryoid Bodies	9952	464/60211	340/93663	-25.685	-23.5169	2.12291
SRX12124749	Ctcf	ES cells	70777	2506/60211	2934/93663	-25.4399	-23.2812	1.32866
SRX13228165	Ctcf	ES cells	45476	1946/60211	2183/93663	-25.4155	-23.2659	1.3867
ERX1493879	Epitope tags	ES cells	6353	168/60211	60/93663	-25.4051	-23.2645	4.35562
SRX5292072	Ctcf	ES cells	63293	2275/60211	2623/93663	-25.3737	-23.2418	1.3492
SRX5850131	Nrf1	ES cells	3187	220/60211	102/93663	-25.3243	-23.201	3.35517
SRX147572	Zic3	ES cells	11823	507/60211	389/93663	-25.2838	-23.169	2.02745
SRX8626582	Ctcf	ES cells	56973	2099/60211	2389/93663	-25.2649	-23.1583	1.36675
SRX12963303	Smc1a	ES cells	66237	2322/60211	2689/93663	-25.2412	-23.1427	1.34327
ERX1493887	Epitope tags	ES cells	6028	169/60211	61/93663	-25.2284	-23.1379	4.30972
SRX11237493	Ctcf	ES cells	70915	2748/60211	3269/93663	-25.1157	-23.033	1.30766
SRX3430129	Ctcf	ES cells	60534	2157/60211	2470/93663	-25.0441	-22.9691	1.35846
SRX14834583	Sox15	ES cells	5909	176/60211	67/93663	-25.0294	-22.962	4.0863
SRX9326752	Smc3	ES cells	42578	1697/60211	1860/93663	-25.0149	-22.9549	1.41926
SRX5292074	Ctcf	ES cells	62594	2281/60211	2638/93663	-24.9943	-22.9416	1.34506
SRX823725	Aff3	ES cells	29141	547/60211	436/93663	-24.8739	-22.8284	1.95161
SRX13228162	Ctcf	ES cells	47764	2007/60211	2273/93663	-24.8597	-22.8212	1.37354
SRX13408940	Ctcf	Embryoid Bodies	40473	1636/60211	1783/93663	-24.8172	-22.7857	1.42733
SRX2000073	Ctcf	ES cells	48161	1786/60211	1981/93663	-24.7662	-22.7415	1.40246
SRX20248707	Ctcf	ES cells	50582	1947/60211	2196/93663	-24.6652	-22.6531	1.3792
SRX13408998	Ctcf	Embryoid Bodies	47045	1847/60211	2063/93663	-24.6644	-22.6531	1.39271
SRX10437500	Ctcf	ES cells	57263	2211/60211	2550/93663	-24.5884	-22.5836	1.34878
SRX19838668	Setd1a	ES cells	6595	326/60211	204/93663	-24.5616	-22.5692	2.48588
SRX5858839	Ctcf	ES cells	72117	2324/60211	2703/93663	-24.5612	-22.5692	1.33746
SRX12124912	Ctcf	Germline stem cell-like cells	45117	1761/60211	1953/93663	-24.4706	-22.4849	1.40265
SRX4167116	Med1	ES cells	34697	1266/60211	1311/93663	-24.3998	-22.4223	1.50218
SRX13408999	Ctcf	Embryoid Bodies	43574	1739/60211	1925/93663	-24.3958	-22.4223	1.40527
SRX11237517	Ctcf	ES cells	89291	3210/60211	3921/93663	-24.3703	-22.4075	1.2735
SRX10641335	Ctcf	ES cells	38624	1599/60211	1742/93663	-24.3691	-22.4075	1.42788
SRX3827066	Ctcf	ES cells	47694	1772/60211	1970/93663	-24.2984	-22.3426	1.39923
SRX5670844	Ctcf	ES cells	43341	1579/60211	1717/93663	-24.2754	-22.3267	1.43055
SRX5850127	Nrf1	ES cells	4159	254/60211	136/93663	-24.2711	-22.3267	2.90527
SRX4734097	Ctcf	ES cells	33947	1495/60211	1608/93663	-24.251	-22.3122	1.44626
SRX13408958	Ctcf	Embryoid Bodies	41216	1624/60211	1776/93663	-24.215	-22.2818	1.42244
SRX2875270	Ctcf	ES cells	48170	1812/60211	2024/93663	-24.1918	-22.264	1.39264
SRX19147918	Ctcf	EpiLC	36066	1440/60211	1537/93663	-24.1857	-22.2633	1.45741
SRX19147914	Ctcf	ES cells	40248	1517/60211	1638/93663	-24.1232	-22.2062	1.44067
SRX5292076	Ctcf	ES cells	47228	1840/60211	2063/93663	-24.0973	-22.1855	1.38743
SRX085110	Smc1a	ES cells	37438	1463/60211	1569/93663	-24.022	-22.1154	1.45049
SRX2172654	Ctcf	iPS cells	61251	2262/60211	2630/93663	-23.9689	-22.0675	1.33792
SRX12124750	Ctcf	ES cells	68568	2493/60211	2944/93663	-23.9586	-22.0623	1.31728
SRX13408959	Ctcf	Embryoid Bodies	50316	1867/60211	2101/93663	-23.9481	-22.0568	1.38233
SRX13408938	Ctcf	Embryoid Bodies	39538	1680/60211	1855/93663	-23.8822	-21.9958	1.40883
SRX10641336	Ctcf	ES cells	37332	1556/60211	1692/93663	-23.8748	-21.9954	1.43054
SRX9326756	Smc3	ES cells	47842	1778/60211	1984/93663	-23.872	-21.9954	1.39406
SRX3602906	Ctcf	iPS cells	50275	1895/60211	2140/93663	-23.8635	-21.9917	1.37749
SRX4167120	Med12	ES cells	20161	748/60211	678/93663	-23.7138	-21.8467	1.71619
SRX11221904	Med4	ES cells	14270	668/60211	584/93663	-23.6543	-21.7919	1.77933
SRX5251398	Foxh1	Embryoid Bodies	21221	917/60211	884/93663	-23.5881	-21.7304	1.61365
SRX4734098	Ctcf	ES cells	28791	1295/60211	1360/93663	-23.5243	-21.6731	1.48123
SRX12124812	Ctcf	PGCLC	83414	2755/60211	3311/93663	-23.5217	-21.6731	1.29436
SRX9567798	Ctcf	ES cells	52010	1793/60211	2012/93663	-23.3876	-21.5435	1.38626
SRX8626584	Ctcf	ES cells	56317	2084/60211	2400/93663	-23.3784	-21.5388	1.35076
ERX2021911	Ctcf	ES cells	54721	1945/60211	2215/93663	-23.3325	-21.4973	1.36596
SRX9326753	Smc3	ES cells	50771	1948/60211	2220/93663	-23.2886	-21.4578	1.36499
SRX13408981	Ctcf	Embryoid Bodies	55028	1903/60211	2160/93663	-23.2727	-21.4462	1.37049
SRX13439997	Ctcf	ES cells	43482	1665/60211	1845/93663	-23.2544	-21.4322	1.40382
SRX8626556	Rad21	ES cells	37911	1572/60211	1723/93663	-23.2253	-21.4073	1.41925
SRX7856884	Ctcf	ES cells	45760	1593/60211	1751/93663	-23.2167	-21.4029	1.41521
SRX803857	Rad23b	ES cells	38535	1392/60211	1489/93663	-23.2001	-21.3904	1.45424
SRX15057957	Zic2	mESCs, differentiated	19158	775/60211	716/93663	-23.1689	-21.3634	1.68376
SRX9326757	Smc3	ES cells	41818	1722/60211	1923/93663	-23.0467	-21.2452	1.39298
SRX14210093	Setd1a	ES cells	9183	500/60211	397/93663	-23.0192	-21.2218	1.95917
SRX19147928	Ctcf	ES cells	38793	1498/60211	1629/93663	-22.9958	-21.2024	1.43048
SRX13408939	Ctcf	Embryoid Bodies	53379	2001/60211	2296/93663	-22.9803	-21.1908	1.35571
SRX5252259	Ctcf	ES cells	57242	2123/60211	2460/93663	-22.971	-21.1855	1.34248
SRX9567817	Ctcf	ES cells	42058	1603/60211	1768/93663	-22.9603	-21.1787	1.4104
SRX4663281	Ctcf	ES cells	51318	1836/60211	2076/93663	-22.9317	-21.1539	1.37574
SRX9107991	Ctcf	ES cells	53572	1966/60211	2250/93663	-22.8997	-21.1258	1.35923
SRX3602905	Ctcf	iPS cells	47313	1866/60211	2118/93663	-22.8282	-21.0581	1.3705
SRX080171	Ctcf	ES cells	58777	2156/60211	2508/93663	-22.7959	-21.0295	1.33725
SRX8626576	Ctcf	ES cells	46647	1858/60211	2109/93663	-22.704	-20.9413	1.37044
SRX9107992	Ctcf	ES cells	49177	1825/60211	2066/93663	-22.678	-20.919	1.37412
ERX2021905	Ctcf	ES cells	50182	1820/60211	2059/93663	-22.6736	-20.9183	1.37501
SRX2402721	Ctcf	ES cells	58900	2264/60211	2657/93663	-22.6462	-20.8945	1.32549
SRX8626586	Ctcf	ES cells	56107	2075/60211	2402/93663	-22.5868	-20.8414	1.34381
SRX1690191	Nrf1	ES cells	4844	334/60211	222/93663	-22.5859	-20.8414	2.34038
SRX13439998	Ctcf	ES cells	41143	1598/60211	1768/93663	-22.5208	-20.7799	1.406
SRX5292075	Ctcf	ES cells	43531	1692/60211	1892/93663	-22.4972	-20.7598	1.39114
SRX19147923	Ctcf	EpiLC	37453	1506/60211	1648/93663	-22.4766	-20.7427	1.42154
SRX9567806	Ctcf	ES cells	42413	1618/60211	1795/93663	-22.4617	-20.7312	1.40219
ERX2021906	Ctcf	ES cells	45495	1689/60211	1889/93663	-22.4546	-20.7276	1.39088
SRX13440003	Ctcf	ES cells	43260	1598/60211	1769/93663	-22.4388	-20.7152	1.40521
SRX2402717	Ctcf	ES cells	55993	2158/60211	2518/93663	-22.4053	-20.685	1.33318
SRX8626585	Ctcf	ES cells	58573	2111/60211	2455/93663	-22.3712	-20.6543	1.33761
SRX4167119	Med12	ES cells	22804	827/60211	787/93663	-22.347	-20.6334	1.63464
SRX13408980	Ctcf	Embryoid Bodies	54499	1920/60211	2198/93663	-22.3403	-20.6313	1.35883
DRX013314	Kdm1a	EpiSC	19216	559/60211	469/93663	-22.3383	-20.6313	1.85409
SRX11221922	Ercc3	ES cells	6365	153/60211	57/93663	-22.3328	-20.6291	4.1755
SRX11221901	Med4	ES cells	18716	907/60211	886/93663	-22.2713	-20.5708	1.59245
SRX13439995	Ctcf	ES cells	46831	1747/60211	1969/93663	-22.2555	-20.5593	1.38019
SRX12124911	Ctcf	Germline stem cell-like cells	45451	1787/60211	2022/93663	-22.2534	-20.5593	1.37479
SRX13440004	Ctcf	ES cells	45708	1693/60211	1897/93663	-22.2362	-20.5452	1.3883
SRX5670843	Ctcf	ES cells	33078	1272/60211	1347/93663	-22.2233	-20.5355	1.46897
SRX19147929	Ctcf	EpiLC	45834	1667/60211	1863/93663	-22.2122	-20.5275	1.39192
SRX20248695	Ctcf	ES cells	48853	1872/60211	2136/93663	-22.1988	-20.5172	1.36332
SRX6639876	Setd1a	ES cells	16404	750/60211	695/93663	-22.1955	-20.5169	1.67868
SRX4551473	Ctcf	ES cells	31272	1318/60211	1407/93663	-22.1678	-20.4923	1.45718
SRX7815877	Ctcf	ES cells	36325	1479/60211	1617/93663	-22.1474	-20.4749	1.42282
SRX11221902	Med4	ES cells	15157	691/60211	625/93663	-22.1426	-20.4731	1.71985
SRX15652586	Ctcf	ES cells	37266	1451/60211	1581/93663	-22.0994	-20.4329	1.42767
SRX5252261	Ctcf	ES cells	58694	2161/60211	2528/93663	-22.0214	-20.3579	1.32975
SRX1690194	Nrf1	ES cells	4401	306/60211	197/93663	-22.0137	-20.3531	2.41628
SRX17066026	Ctcf	mESC derived erythroid cells	31219	1302/60211	1390/93663	-21.9056	-20.2479	1.4571
SRX13439996	Ctcf	ES cells	40729	1573/60211	1744/93663	-21.8974	-20.2444	1.40305
SRX2916323	Ctcf	mESC derived neural cells	55957	2058/60211	2392/93663	-21.8963	-20.2444	1.33837
SRX5292078	Ctcf	ES cells	62773	2081/60211	2423/93663	-21.8542	-20.2052	1.33601
SRX20248713	Ctcf	ES cells	54369	2001/60211	2315/93663	-21.8509	-20.2047	1.34459
SRX2172655	Ctcf	iPS cells	52656	1922/60211	2210/93663	-21.7796	-20.1363	1.35286
SRX2875269	Ctcf	ES cells	46111	1742/60211	1970/93663	-21.7636	-20.1231	1.37554
SRX8582159	Ctcf	ES cells	31984	1287/60211	1374/93663	-21.7076	-20.0699	1.45708
SRX4167113	Med1	ES cells	24120	935/60211	927/93663	-21.6846	-20.0497	1.569
SRX4551472	Ctcf	ES cells	31563	1344/60211	1448/93663	-21.6588	-20.0266	1.44385
SRX10560014	Ctcf	ES cells	79795	2709/60211	3285/93663	-21.6533	-20.0239	1.28282
SRX19147922	Ctcf	ES cells	33688	1369/60211	1481/93663	-21.65	-20.0233	1.43794
SRX390399	Tcf12	mESC derived endodermal cells	41501	1375/60211	1488/93663	-21.6451	-20.0211	1.43745
SRX14210168	Setd1a	ES cells	7609	432/60211	332/93663	-21.6276	-20.0063	2.02413
SRX022692	Med12	ES cells	18862	865/60211	841/93663	-21.6141	-19.998	1.59997
SRX5858837	Ctcf	ES cells	60045	1953/60211	2255/93663	-21.614	-19.998	1.34725
SRX2172650	Ctcf	iPS cells	61133	2247/60211	2654/93663	-21.5706	-19.9572	1.31703
SRX20248685	Ctcf	ES cells	53002	1826/60211	2086/93663	-21.5551	-19.9444	1.36169
SRX6831868	Ctcf	ES cells	35905	1380/60211	1497/93663	-21.5381	-19.93	1.434
SRX2000071	Ctcf	ES cells	56973	1961/60211	2267/93663	-21.5191	-19.9136	1.34561
SRX143842	Ep300	ES cells	41387	1486/60211	1636/93663	-21.492	-19.889	1.41295
SRX5850135	Nrf1	ES cells	4054	234/60211	130/93663	-21.4178	-19.8174	2.80004
SRX6783993	Ctcf	ES cells	31239	1285/60211	1375/93663	-21.3787	-19.7809	1.45376
SRX5850138	Nrf1	ES cells	3259	190/60211	90/93663	-21.3648	-19.7695	3.284
SRX4167118	Med12	ES cells	27643	956/60211	957/93663	-21.3321	-19.7393	1.55395
SRX9567795	Ctcf	ES cells	40436	1458/60211	1602/93663	-21.2653	-19.675	1.41575
SRX062994	Ep300	ES cells	41370	1479/60211	1630/93663	-21.2614	-19.6736	1.41147
SRX5817869	Zic2	ES cells	11917	593/60211	517/93663	-21.248	-19.6633	1.78425
ERX2021914	Ctcf	ES cells	40134	1587/60211	1773/93663	-21.2462	-19.6633	1.39239
SRX9326755	Smc3	ES cells	49564	1833/60211	2100/93663	-21.2388	-19.6604	1.3578
SRX12260418	Ctcf	mESC derived erythroid cells	31738	1272/60211	1361/93663	-21.236	-19.6604	1.45386
SRX17066024	Ctcf	mESC derived erythroid cells	31738	1272/60211	1361/93663	-21.236	-19.6604	1.45386
SRX19147924	Ctcf	EpiLC	44517	1747/60211	1986/93663	-21.2111	-19.6379	1.36838
SRX12124813	Ctcf	PGCLC	86523	2855/60211	3497/93663	-21.1862	-19.6154	1.27
SRX9107990	Rad21	ES cells	70602	2500/60211	3008/93663	-21.1578	-19.5894	1.29287
SRX19147925	Ctcf	EpiLC	39249	1572/60211	1755/93663	-21.1379	-19.5719	1.39337
SRX8332823	Ctcf	mESC derived haematopoietic progenitor	35564	1439/60211	1580/93663	-21.1313	-19.5676	1.41676
SRX20248701	Ctcf	ES cells	41820	1668/60211	1882/93663	-21.1218	-19.5605	1.3787
SRX3602902	Ctcf	iPS cells	43942	1766/60211	2013/93663	-21.1108	-19.5518	1.36471
SRX19767089	Ctcf	ES cells	52541	1887/60211	2175/93663	-21.0844	-19.5277	1.3496
SRX803859	Rad23b	ES cells	28615	1111/60211	1156/93663	-21.0629	-19.5105	1.49502
SRX080170	Ctcf	ES cells	70119	2317/60211	2759/93663	-21.0626	-19.5105	1.30637
SRX5850130	Nrf1	ES cells	4411	230/60211	128/93663	-21.0374	-19.4876	2.79518
SRX19147971	Ctcf	EpiLC	42707	1703/60211	1930/93663	-21.0289	-19.4814	1.37262
SRX15057955	Zic3	mESCs, differentiated	11220	494/60211	405/93663	-20.9971	-19.4518	1.89742
SRX5858855	Smc1a	ES cells	19808	867/60211	850/93663	-20.9529	-19.4099	1.58669
SRX823724	Aff3	ES cells	19582	428/60211	332/93663	-20.9342	-19.3934	2.00539
SRX19767087	Ctcf	ES cells	58488	2023/60211	2362/93663	-20.925	-19.3864	1.33232
ERX2021913	Ctcf	ES cells	34245	1386/60211	1514/93663	-20.8884	-19.352	1.42406
SRX2172651	Ctcf	iPS cells	37528	1529/60211	1702/93663	-20.8801	-19.3459	1.39746
SRX19147921	Ctcf	ES cells	34768	1440/60211	1585/93663	-20.8566	-19.3246	1.41327
SRX6639878	Setd1a	ES cells	13427	628/60211	562/93663	-20.8506	-19.3208	1.73826
SRX6831860	Ctcf	ES cells	36118	1451/60211	1600/93663	-20.8425	-19.3149	1.41072
SRX9326754	Smc3	ES cells	42487	1706/60211	1937/93663	-20.8301	-19.3046	1.37007
SRX9326758	Smc3	ES cells	44603	1767/60211	2020/93663	-20.7829	-19.2596	1.36075
SRX20248684	Ctcf	ES cells	43808	1613/60211	1815/93663	-20.7724	-19.2512	1.38245
SRX19147969	Ctcf	ES cells	35981	1431/60211	1575/93663	-20.742	-19.2229	1.41336
SRX1670203	Rad21	ES cells	34918	1550/60211	1732/93663	-20.7258	-19.2088	1.39212
SRX3602889	Ctcf	iPS cells	48325	1790/60211	2052/93663	-20.713	-19.1981	1.35696
SRX2609737	Med1	ES cells	34642	1214/60211	1293/93663	-20.6682	-19.1554	1.46054
SRX4551474	Ctcf	ES cells	36084	1485/60211	1647/93663	-20.6455	-19.1348	1.40257
SRX9567811	Ctcf	ES cells	31546	1201/60211	1277/93663	-20.635	-19.1264	1.463
SRX6831861	Ctcf	ES cells	34336	1481/60211	1642/93663	-20.6242	-19.1176	1.40305
SRX2916328	Ctcf	mESC derived neural cells	51915	1939/60211	2254/93663	-20.5985	-19.094	1.33818
SRX9418410	Ctcf	ES cells	45309	1904/60211	2207/93663	-20.576	-19.0735	1.34201
SRX5292079	Ctcf	ES cells	43024	1539/60211	1720/93663	-20.5596	-19.0592	1.39188
SRX19147919	Ctcf	EpiLC	30321	1265/60211	1362/93663	-20.5137	-19.0154	1.44479
SRX11676926	Ctcf	Embryoid Bodies	40909	1683/60211	1912/93663	-20.5091	-19.0154	1.36927
SRX19136121	Ctcf	ES cells	33409	1445/60211	1597/93663	-20.5082	-19.0154	1.40752
SRX4551471	Ctcf	ES cells	30300	1301/60211	1408/93663	-20.5078	-19.0154	1.43736
SRX11676924	Ctcf	Embryoid Bodies	45761	1777/60211	2038/93663	-20.5002	-19.0098	1.35636
SRX20248683	Ctcf	ES cells	53282	1821/60211	2097/93663	-20.4763	-18.9879	1.35084
SRX3602884	Ctcf	iPS cells	35435	1464/60211	1623/93663	-20.4555	-18.969	1.40318
SRX7617539	Ctcf	mESCs, differentiated	53626	2066/60211	2429/93663	-20.4458	-18.9613	1.32311
SRX13408960	Ctcf	Embryoid Bodies	33292	1335/60211	1454/93663	-20.4324	-18.9499	1.42827
SRX5850136	Nrf1	ES cells	3311	206/60211	108/93663	-20.4221	-18.9415	2.96712
SRX3602900	Ctcf	iPS cells	45259	1766/60211	2025/93663	-20.4096	-18.9309	1.35662
SRX695696	Zic2	ES cells	14409	628/60211	566/93663	-20.4039	-18.9272	1.72598
SRX11237537	Smc1a	ES cells	31936	1378/60211	1511/93663	-20.395	-18.9216	1.41866
SRX3602890	Ctcf	iPS cells	34724	1426/60211	1573/93663	-20.3945	-18.9216	1.41021
SRX15652609	Ctcf	ES cells	45879	1738/60211	1988/93663	-20.3879	-18.9169	1.35996
SRX5251392	Smad2	Embryoid Bodies	26149	1063/60211	1104/93663	-20.3788	-18.9097	1.49781
SRX080167	Ctcf	ES cells	55246	1695/60211	1931/93663	-20.3425	-18.8753	1.36546
SRX19767088	Ctcf	ES cells	70528	2347/60211	2815/93663	-20.3118	-18.8464	1.29696
SRX19767090	Ctcf	ES cells	56442	1958/60211	2285/93663	-20.3044	-18.8409	1.33296
SRX12124914	Rad21	Germline stem cell-like cells	16838	781/60211	752/93663	-20.2856	-18.824	1.61557
SRX10040679	Ctcf	ES cells	46859	1587/60211	1789/93663	-20.2501	-18.7903	1.37994
SRX022695	Med1	ES cells	15346	704/60211	658/93663	-20.2328	-18.7763	1.66433
SRX3602895	Ctcf	iPS cells	39093	1577/60211	1776/93663	-20.2324	-18.7763	1.38128
SRX3602893	Ctcf	iPS cells	46285	1774/60211	2039/93663	-20.2276	-18.7737	1.35341
SRX5850128	Nrf1	ES cells	4017	205/60211	108/93663	-20.2261	-18.7737	2.95272
SRX19147915	Ctcf	ES cells	30463	1228/60211	1318/93663	-20.1939	-18.7433	1.44936
SRX20248712	Rad21	ES cells	51362	1925/60211	2243/93663	-20.1762	-18.7274	1.33504
SRX13476138	Ctcf	ES cells	24078	1036/60211	1072/93663	-20.1737	-18.7267	1.50334
SRX5252273	Rad21	ES cells	32946	1178/60211	1254/93663	-20.1294	-18.6842	1.4613
SRX8626575	Ctcf	ES cells	39423	1655/60211	1881/93663	-20.1051	-18.6616	1.36868
SRX15652588	Ctcf	ES cells	35504	1382/60211	1520/93663	-20.0757	-18.634	1.41435
SRX11676919	Ctcf	ES cells	56575	2095/60211	2475/93663	-20.0704	-18.6305	1.31674
SRX022689	Smc1a	ES cells	29866	1216/60211	1304/93663	-20.0518	-18.6137	1.4506
SRX5251391	Smad2	Embryoid Bodies	9577	444/60211	356/93663	-20.0486	-18.6125	1.9401
SRX19767086	Ctcf	ES cells	55288	1943/60211	2269/93663	-20.0471	-18.6125	1.33208
SRX11237531	Smc1a	ES cells	37027	1530/60211	1716/93663	-20.0338	-18.6009	1.38697
SRX3602904	Ctcf	iPS cells	43942	1693/60211	1934/93663	-19.9826	-18.5514	1.36174
SRX13440005	Ctcf	ES cells	36582	1442/60211	1601/93663	-19.9592	-18.5298	1.40109
SRX7815876	Ctcf	ES cells	34309	1373/60211	1511/93663	-19.9496	-18.5219	1.41351
SRX3602891	Ctcf	iPS cells	42598	1707/60211	1954/93663	-19.9446	-18.5186	1.35894
SRX11123487	Wiz	ES cells	30419	1411/60211	1561/93663	-19.9351	-18.5108	1.4061
SRX3602898	Ctcf	iPS cells	35944	1417/60211	1569/93663	-19.925	-18.5024	1.40488
SRX10134085	Ctcf	mESCs, differentiated	47762	1942/60211	2270/93663	-19.9153	-18.4944	1.33081
SRX11676923	Ctcf	Embryoid Bodies	45902	1785/60211	2059/93663	-19.8721	-18.4529	1.34857
SRX1670191	Rad21	ES cells	45075	1832/60211	2124/93663	-19.8121	-18.3971	1.34172
SRX12260410	Ctcf	mESC derived erythroid cells	26735	1194/60211	1279/93663	-19.8113	-18.3971	1.4522
SRX17066022	Ctcf	mESC derived erythroid cells	26735	1194/60211	1279/93663	-19.8113	-18.3971	1.4522
SRX672417	Ctcf	mESC derived neural cells	27471	1058/60211	1105/93663	-19.7752	-18.3627	1.48941
SRX19147970	Ctcf	EpiLC	42180	1619/60211	1840/93663	-19.7215	-18.3106	1.36874
SRX2916338	Ctcf	mESC derived neural cells	39917	1574/60211	1780/93663	-19.7143	-18.3051	1.37555
SRX15652610	Ctcf	ES cells	46794	1678/60211	1919/93663	-19.7098	-18.3022	1.36022
SRX8626567	Ctcf	ES cells	38632	1593/60211	1805/93663	-19.6933	-18.2873	1.37287
SRX1670199	Rad21	ES cells	35193	1505/60211	1689/93663	-19.6608	-18.2565	1.38611
SRX15652589	Ctcf	ES cells	30767	1244/60211	1347/93663	-19.6097	-18.207	1.43663
SRX6831871	Rad21	ES cells	42492	1760/60211	2031/93663	-19.578	-18.1769	1.34802
SRX2755308	Ctcf	ES cells	22260	1040/60211	1084/93663	-19.5722	-18.1727	1.49244
SRX20248686	Ctcf	ES cells	48464	1744/60211	2010/93663	-19.5515	-18.1536	1.34972
SRX047141	Kdm1a	ES cells	42904	1552/60211	1753/93663	-19.5486	-18.1523	1.37722
SRX8626568	Ctcf	ES cells	34634	1502/60211	1687/93663	-19.5398	-18.1451	1.38499
SRX12124751	Rad21	ES cells	24750	1103/60211	1166/93663	-19.5089	-18.1158	1.47153
SRX10641394	Ctcf	ES cells	15077	760/60211	735/93663	-19.451	-18.0595	1.60849
SRX236482	Cdk8	ES cells	11820	582/60211	520/93663	-19.4326	-18.0427	1.74105
SRX13476139	Ctcf	ES cells	27894	1146/60211	1223/93663	-19.4064	-18.018	1.45764
SRX3602903	Ctcf	iPS cells	37324	1470/60211	1647/93663	-19.3605	-17.9737	1.3884
SRX8626558	Ctcf	ES cells	35159	1532/60211	1730/93663	-19.3465	-17.9628	1.37754
SRX6831869	Ctcf	ES cells	38401	1671/60211	1915/93663	-19.3465	-17.9628	1.35738
SRX2916333	Ctcf	mESC derived neural cells	41977	1613/60211	1838/93663	-19.3357	-17.9536	1.36515
SRX11676922	Ctcf	ES cells	42556	1696/60211	1950/93663	-19.3191	-17.9385	1.35296
SRX3602909	Ctcf	iPS cells	36521	1495/60211	1682/93663	-19.3058	-17.9267	1.38263
SRX143840	Ctcf	ES cells	44938	1485/60211	1668/93663	-19.3005	-17.923	1.38491
SRX19136129	Ctcf	ES cells	30076	1346/60211	1485/93663	-19.2713	-17.8965	1.40997
SRX3602892	Ctcf	iPS cells	34288	1383/60211	1534/93663	-19.271	-17.8965	1.40246
SRX19147972	Ctcf	EpiLC	40594	1636/60211	1870/93663	-19.2618	-17.8888	1.36092
SRX1670207	Rad21	ES cells	42038	1831/60211	2132/93663	-19.245	-17.8735	1.33596
SRX1280442	Nrf1	mESC derived neural cells	9807	413/60211	327/93663	-19.2421	-17.8725	1.96469
SRX10641418	Ctcf	ES cells	22403	1027/60211	1072/93663	-19.2409	-17.8725	1.49028
SRX19136127	Ctcf	ES cells	34726	1501/60211	1691/93663	-19.2231	-17.8561	1.3808
SRX3602887	Ctcf	iPS cells	34155	1464/60211	1642/93663	-19.1984	-17.8329	1.38695
SRX6783992	Ctcf	ES cells	31145	1267/60211	1383/93663	-19.1945	-17.8305	1.4251
SRX19136123	Ctcf	ES cells	33617	1465/60211	1644/93663	-19.1786	-17.8161	1.38621
SRX3602885	Ctcf	iPS cells	38709	1541/60211	1746/93663	-19.1304	-17.7694	1.37294
SRX7617545	Ctcf	mESCs, differentiated	49922	1937/60211	2278/93663	-19.1207	-17.7611	1.32272
SRX2609735	Med1	ES cells	16824	654/60211	609/93663	-19.0881	-17.73	1.67052
SRX2790845	Ctcf	ES cells	39202	1569/60211	1784/93663	-19.0659	-17.7093	1.36811
SRX6915171	Ctcf	ES cells	29893	1306/60211	1436/93663	-19.0583	-17.7031	1.41475
SRX1781895	Rad21	ES cells	37958	1389/60211	1546/93663	-19.0052	-17.652	1.39761
SRX2790850	Ctcf	ES cells	40345	1638/60211	1877/93663	-19.0043	-17.652	1.35751
SRX6831865	Wiz	ES cells	25881	1133/60211	1211/93663	-19.0016	-17.6508	1.45539
SRX14210153	Setd1a	ES cells	8149	443/60211	363/93663	-18.9924	-17.643	1.89841
SRX3602888	Ctcf	iPS cells	36296	1407/60211	1570/93663	-18.9804	-17.6324	1.39408
SRX11676921	Ctcf	ES cells	43579	1739/60211	2014/93663	-18.9402	-17.5937	1.34317
SRX19147927	Ctcf	ES cells	29779	1175/60211	1267/93663	-18.9383	-17.5932	1.44263
SRX022690	Smc3	ES cells	26746	1078/60211	1142/93663	-18.931	-17.5873	1.4684
SRX1670195	Rad21	ES cells	37695	1591/60211	1816/93663	-18.9216	-17.5793	1.36285
SRX15652587	Ctcf	ES cells	30566	1336/60211	1477/93663	-18.9158	-17.5749	1.40708
SRX13440007	Ctcf	mESC derived neural cells	41950	1501/60211	1696/93663	-18.9013	-17.5618	1.37672
SRX5850129	Nrf1	ES cells	4379	261/60211	168/93663	-18.8972	-17.5591	2.4167
SRX5252271	Rad21	ES cells	25416	969/60211	1003/93663	-18.8931	-17.5564	1.50285
SRX6831870	Rad21	ES cells	55799	2194/60211	2634/93663	-18.8868	-17.5515	1.29573
SRX6915172	Ctcf	ES cells	24816	1135/60211	1216/93663	-18.8604	-17.5268	1.45196
SRX8332822	Ctcf	mESC derived haematopoietic progenitor	26223	1174/60211	1267/93663	-18.8593	-17.5268	1.4414
SRX2172653	Ctcf	ES cells	40318	1581/60211	1804/93663	-18.8251	-17.4939	1.36329
SRX8582163	Ctcf	ES cells	34191	1317/60211	1454/93663	-18.7922	-17.4632	1.40901
SRX188819	Hcfc1	ES cells	14853	618/60211	569/93663	-18.7916	-17.4632	1.68954
SRX13408961	Ctcf	Embryoid Bodies	26072	1168/60211	1260/93663	-18.7895	-17.4624	1.442
SRX2830662	Setd1a	ES cells	6454	308/60211	217/93663	-18.7686	-17.4429	2.20792
SRX236483	Cdk9	ES cells	10339	536/60211	472/93663	-18.7601	-17.4358	1.76651
SRX14601067	Rad21	ES cells	26657	1306/60211	1441/93663	-18.7102	-17.3872	1.40985
SRX2755305	Ctcf	ES cells	16246	794/60211	785/93663	-18.6682	-17.3466	1.57341
SRX2790847	Ctcf	ES cells	44963	1721/60211	1995/93663	-18.6408	-17.3205	1.34193
SRX3118387	Rad21	ES cells	41845	1503/60211	1703/93663	-18.6326	-17.3136	1.37289
SRX5850133	Nrf1	ES cells	3851	227/60211	136/93663	-18.6252	-17.3076	2.59645
SRX7815875	Ctcf	ES cells	33674	1365/60211	1520/93663	-18.6215	-17.3063	1.39695
SRX7622741	Stag1	ES cells	44830	1822/60211	2132/93663	-18.6213	-17.3063	1.32939
SRX11221925	Ercc3	ES cells	5151	125/60211	46/93663	-18.6079	-17.2943	4.22712
SRX1280440	Nrf1	mESC derived neural cells	8291	380/60211	296/93663	-18.5434	-17.2311	1.99703
SRX5292080	Ctcf	ES cells	53682	1869/60211	2197/93663	-18.5285	-17.2175	1.32334
SRX9099845	Ctcf	Extended pluripotent stem cells	50843	1973/60211	2339/93663	-18.5267	-17.217	1.31217
SRX11237519	Smc1a	ES cells	34538	1434/60211	1614/93663	-18.4853	-17.178	1.38209
SRX2762172	Setd1a	ES cells	27354	1401/60211	1570/93663	-18.4851	-17.178	1.38813
SRX8332836	Ctcf	mESC derived haematopoietic progenitor	32685	1363/60211	1520/93663	-18.4783	-17.1725	1.3949
SRX11676925	Ctcf	Embryoid Bodies	32652	1386/60211	1551/93663	-18.4561	-17.1516	1.39009
SRX13408941	Ctcf	Embryoid Bodies	29850	1309/60211	1450/93663	-18.3969	-17.0937	1.40431
SRX9567807	Ctcf	ES cells	27587	1103/60211	1182/93663	-18.337	-17.0351	1.45161
SRX10560012	Ctcf	ES cells	70496	2463/60211	3016/93663	-18.3226	-17.022	1.27036
SRX8332835	Ctcf	mESC derived haematopoietic progenitor	30411	1256/60211	1381/93663	-18.3197	-17.0203	1.41478
SRX12124752	Rad21	ES cells	23385	1070/60211	1140/93663	-18.3118	-17.0139	1.46006
SRX11237532	Smc3	ES cells	37506	1573/60211	1802/93663	-18.3107	-17.0139	1.35789
SRX20248687	Rad21	ES cells	48962	1728/60211	2011/93663	-18.2659	-16.9703	1.33667
SRX7617543	Ctcf	mESCs, differentiated	57257	2136/60211	2567/93663	-18.2638	-16.9695	1.2944
SRX2172652	Ctcf	iPS cells	34930	1400/60211	1572/93663	-18.2556	-16.9626	1.38538
SRX080168	Ctcf	ES cells	46872	1549/60211	1771/93663	-18.2409	-16.9491	1.36058
SRX5125625	Ctcf	ES cells	46697	1799/60211	2108/93663	-18.2379	-16.9474	1.32756
SRX5125731	Ctcf	ES cells	65935	2377/60211	2899/93663	-18.2337	-16.9444	1.27548
SRX390396	Smad2	mESC derived endodermal cells	58377	1696/60211	1969/93663	-18.2051	-16.9171	1.3399
SRX6915177	Ctcf	ES cells	19208	927/60211	958/93663	-18.1998	-16.913	1.50524
SRX1690193	Nrf1	ES cells	4471	314/60211	227/93663	-18.1937	-16.9082	2.15177
SRX5358273	Ctcf	mESCs, differentiated	52103	1818/60211	2134/93663	-18.1766	-16.8923	1.32523
SRX2790848	Ctcf	ES cells	37752	1590/60211	1827/93663	-18.1697	-16.8866	1.35379
SRX104393	Rad21	ES cells	32649	1149/60211	1244/93663	-18.1297	-16.8479	1.43679
SRX5077387	Ctcf	ES cells	39610	1530/60211	1748/93663	-18.1038	-16.8232	1.36158
SRX4551476	Ctcf	ES cells	25124	1112/60211	1197/93663	-18.0738	-16.7947	1.44512
SRX11123485	Wiz	ES cells	25373	1208/60211	1322/93663	-18.0729	-16.7947	1.42144
SRX11221924	Ercc3	ES cells	9401	250/60211	161/93663	-18.0577	-16.7807	2.4155
SRX11221903	Med4	ES cells	14023	612/60211	569/93663	-18.044	-16.7682	1.67314
SRX1690192	Nrf1	ES cells	6131	385/60211	305/93663	-18.0213	-16.7468	1.9636
SRX19767085	Ctcf	ES cells	46920	1669/60211	1936/93663	-18.0137	-16.7404	1.34104
SRX12124847	Rad21	PGCLC	17039	834/60211	843/93663	-18.0081	-16.736	1.53897
ERX2021916	Rad21	ES cells	37408	1503/60211	1714/93663	-17.9941	-16.7232	1.36408
SRX4096933	Ctcf	ES cells	25710	1152/60211	1251/93663	-17.9698	-16.7001	1.43248
SRX3118386	Rad21	ES cells	37332	1353/60211	1515/93663	-17.96	-16.6914	1.38924
SRX2388542	Biotin	ES cells	18151	698/60211	674/93663	-17.948	-16.6806	1.61097
SRX4167137	Smc1a	ES cells	34968	1502/60211	1713/93663	-17.9371	-16.6709	1.36397
SRX188827	Zfp384	ES cells	33246	898/60211	925/93663	-17.9232	-16.6582	1.51017
SRX13440000	Ctcf	mESC derived neural cells	35314	1286/60211	1427/93663	-17.9099	-16.6461	1.40187
SRX16989241	Smc3	ES cells	31421	1166/60211	1270/93663	-17.9043	-16.6417	1.42819
SRX13476137	Ctcf	ES cells	24547	1038/60211	1104/93663	-17.8981	-16.6366	1.46258
SRX7856883	Ctcf	ES cells	33412	1255/60211	1387/93663	-17.8872	-16.6269	1.40754
SRX19136131	Ctcf	ES cells	29968	1322/60211	1475/93663	-17.8566	-16.5975	1.39422
SRX5125726	Ctcf	iPS cells	36713	1462/60211	1661/93663	-17.8527	-16.5947	1.36921
SRX5401521	Ctcf	ES cells	27285	1270/60211	1407/93663	-17.826	-16.5692	1.40411
SRX5251397	Foxh1	Embryoid Bodies	25926	1115/60211	1205/93663	-17.8198	-16.5641	1.4394
SRX5670842	Ctcf	ES cells	20790	823/60211	832/93663	-17.744	-16.4895	1.53875
SRX3751909	Brd9	ES cells	10746	570/60211	521/93663	-17.7406	-16.4872	1.70188
SRX9099846	Ctcf	Extended pluripotent stem cells	48515	1846/60211	2181/93663	-17.7314	-16.4792	1.31664
SRX5858841	Ctcf	ES cells	30032	1116/60211	1208/93663	-17.7061	-16.455	1.43711
SRX7622754	Rad21	ES cells	42477	1691/60211	1971/93663	-17.6857	-16.4358	1.33459
SRX9641485	Rad21	ES cells	41409	1660/60211	1930/93663	-17.6793	-16.4305	1.33796
SRX5358274	Ctcf	mESCs, differentiated	48808	1761/60211	2066/93663	-17.678	-16.4304	1.32593
SRX5858852	Ctcf	ES cells	25811	1221/60211	1345/93663	-17.6739	-16.4274	1.41217
SRX7622746	Stag1	ES cells	42446	1761/60211	2067/93663	-17.6701	-16.4247	1.32529
SRX4096935	Ctcf	ES cells	33457	1379/60211	1554/93663	-17.66	-16.4157	1.3804
SRX6915173	Ctcf	ES cells	22956	1050/60211	1123/93663	-17.6531	-16.41	1.45446
SRX672418	Ctcf	mESC derived neural cells	21023	875/60211	899/93663	-17.6343	-16.3923	1.51405
SRX7617541	Ctcf	mESCs, differentiated	50263	1957/60211	2335/93663	-17.6135	-16.3726	1.30376
SRX15057958	Zic3	mESCs, differentiated	22577	855/60211	874/93663	-17.5907	-16.3509	1.52176
SRX342721	Kmt2d	Embryoid Bodies	9620	398/60211	323/93663	-17.5552	-16.3165	1.91678
SRX2172649	Ctcf	iPS cells	33141	1348/60211	1515/93663	-17.5395	-16.3019	1.38411
SRX2440050	Smc1a	EpiSC	12778	604/60211	564/93663	-17.5326	-16.2961	1.6659
SRX5858849	Ctcf	ES cells	23554	1141/60211	1243/93663	-17.5291	-16.2938	1.42793
SRX390391	Smad2	ES cells	31569	1135/60211	1236/93663	-17.4586	-16.2244	1.42847
SRX5600782	Setd1a	ES cells	54948	2339/60211	2864/93663	-17.4552	-16.2221	1.27043
SRX7988735	Epitope tags	ES cells	20618	861/60211	883/93663	-17.4472	-16.2151	1.51682
SRX5858840	Ctcf	ES cells	32604	1194/60211	1313/93663	-17.4269	-16.1959	1.41459
SRX9567810	Ctcf	ES cells	26569	1040/60211	1113/93663	-17.3834	-16.1535	1.45355
SRX11676920	Ctcf	ES cells	40397	1612/60211	1871/93663	-17.369	-16.1402	1.34024
SRX5850132	Nrf1	ES cells	2561	145/60211	66/93663	-17.3519	-16.1242	3.41756
SRX19147968	Ctcf	ES cells	25204	1057/60211	1136/93663	-17.3344	-16.1078	1.4474
SRX7622751	Stag2	ES cells	33913	1419/60211	1613/93663	-17.3291	-16.1036	1.36849
SRX9567799	Ctcf	ES cells	28369	1082/60211	1169/93663	-17.3226	-16.0981	1.43981
SRX19147967	Ctcf	ES cells	25758	1128/60211	1229/93663	-17.3111	-16.0877	1.42774
SRX4578585	Smad2	ES cells	24672	1013/60211	1081/93663	-17.2324	-16.0101	1.45773
SRX20248718	Rad21	ES cells	48106	1855/60211	2203/93663	-17.2292	-16.0084	1.30985
SRX13440008	Ctcf	mESC derived neural cells	37363	1364/60211	1541/93663	-17.2286	-16.0084	1.3769
SRX3602901	Ctcf	iPS cells	35239	1492/60211	1712/93663	-17.217	-15.9979	1.35568
SRX11237526	Smc3	ES cells	33581	1471/60211	1684/93663	-17.1866	-15.9685	1.35882
SRX1670187	Rad21	ES cells	31587	1313/60211	1474/93663	-17.1613	-15.9443	1.38567
SRX19767093	Ctcf	ES cells	34816	1347/60211	1520/93663	-17.146	-15.931	1.37853
SRX1704883	Ctcf	ES cells	61570	2170/60211	2637/93663	-17.1459	-15.931	1.28009
SRX4232697	Tet2	ES cells	15632	592/60211	554/93663	-17.1351	-15.9213	1.66228
SRX7622745	Rad21	ES cells	25592	1228/60211	1363/93663	-17.1204	-15.9076	1.40151
SRX11237495	Smc1a	ES cells	26447	1124/60211	1226/93663	-17.1184	-15.9066	1.42616
SRX7622743	Stag2	ES cells	37418	1512/60211	1741/93663	-17.1094	-15.8992	1.35097
SRX3602886	Ctcf	iPS cells	38391	1494/60211	1717/93663	-17.1089	-15.8992	1.35354
SRX11237524	Rad21	ES cells	37328	1555/60211	1799/93663	-17.0988	-15.8902	1.34459
SRX7546914	Zic3	ES cells	6463	394/60211	322/93663	-17.0758	-15.8682	1.90341
SRX13440002	Ctcf	mESC derived neural cells	30974	1243/60211	1383/93663	-17.0615	-15.8549	1.39811
SRX5817882	Zic2	ES cells	10600	487/60211	429/93663	-17.0251	-15.8196	1.76589
SRX12260411	Ctcf	mESC derived erythroid cells	26959	1245/60211	1387/93663	-17.0209	-15.8174	1.39632
SRX17066023	Ctcf	mESC derived erythroid cells	26959	1245/60211	1387/93663	-17.0209	-15.8174	1.39632
SRX12124848	Rad21	PGCLC	19019	901/60211	940/93663	-17.0185	-15.816	1.49104
SRX2172656	Ctcf	iPS cells	18025	826/60211	844/93663	-17.0114	-15.81	1.5224
SRX13476136	Ctcf	ES cells	26253	1074/60211	1163/93663	-17.0083	-15.8079	1.43654
SRX022697	Nipbl	ES cells	13693	556/60211	512/93663	-16.9923	-15.7929	1.68926
SRX8754232	Runx1	ES cells	5308	138/60211	61/93663	-16.976	-15.7776	3.51918
SRX062991	Ctcf	ES cells	39076	1343/60211	1517/93663	-16.9676	-15.7702	1.37715
SRX3602899	Ctcf	iPS cells	21879	979/60211	1040/93663	-16.9624	-15.766	1.46434
SRX5077388	Ctcf	ES cells	43068	1623/60211	1893/93663	-16.9525	-15.7571	1.33371
SRX11237538	Smc3	ES cells	33816	1442/60211	1650/93663	-16.9438	-15.7494	1.35948
SRX1670183	Rad21	ES cells	30414	1367/60211	1550/93663	-16.9412	-15.7478	1.37192
SRX5858842	Ctcf	ES cells	28383	1075/60211	1166/93663	-16.8957	-15.7033	1.43417
SRX20248688	Rad21	ES cells	40110	1576/60211	1831/93663	-16.8524	-15.661	1.33894
SRX7622749	Rad21	ES cells	26292	1219/60211	1355/93663	-16.8427	-15.6523	1.39945
SRX5926388	Med1	ES cells	23727	980/60211	1044/93663	-16.8283	-15.6389	1.46022
SRX20248689	Rad21	ES cells	35436	1409/60211	1609/93663	-16.761	-15.5734	1.36222
SRX7622740	Stag1	ES cells	41473	1716/60211	2023/93663	-16.7608	-15.5734	1.31951
SRX11237508	Smc3	ES cells	27792	1257/60211	1407/93663	-16.7528	-15.5664	1.38974
SRX4159298	Epitope tags	F9	86801	1960/60211	2356/93663	-16.743	-15.5576	1.29412
SRX4551475	Ctcf	ES cells	24083	1094/60211	1193/93663	-16.7368	-15.5524	1.42649
SRX14601063	Rad21	ES cells	24822	1203/60211	1337/93663	-16.6654	-15.4819	1.39967
SRX7988732	Epitope tags	ES cells	18740	622/60211	595/93663	-16.6263	-15.4438	1.62617
SRX7622742	Stag2	ES cells	28249	1228/60211	1370/93663	-16.6203	-15.4388	1.39434
SRX214081	Pou5f1	ES cells	14472	513/60211	464/93663	-16.6064	-15.4259	1.71985
SRX4506777	Brd4	ES cells	12665	574/60211	537/93663	-16.5996	-15.42	1.66276
SRX8642892	Rad21	ES cells	27729	1213/60211	1351/93663	-16.5964	-15.4178	1.39668
SRX16815351	Pou5f1	ES cells	29818	997/60211	1069/93663	-16.5915	-15.4139	1.45081
SRX104382	Ncaph2	ES cells	5237	252/60211	171/93663	-16.5504	-15.3737	2.29243
SRX4506780	Brd4	ES cells	17197	783/60211	796/93663	-16.5493	-15.3736	1.53017
SRX3602894	Ctcf	iPS cells	23904	1064/60211	1157/93663	-16.5401	-15.3654	1.43054
SRX188830	Zc3h11a	ES cells	19104	810/60211	830/93663	-16.533	-15.3592	1.5181
SRX9731385	Epitope tags	ES cells	8053	267/60211	187/93663	-16.5143	-15.3415	2.22107
SRX11237525	Smc1a	ES cells	28473	1268/60211	1425/93663	-16.5107	-15.3398	1.38419
SRX5401518	Ctcf	ES cells	25355	1268/60211	1425/93663	-16.5107	-15.3398	1.38419
SRX4167117	Med12	ES cells	25593	857/60211	890/93663	-16.4799	-15.3099	1.4979
SRX19136125	Ctcf	ES cells	34227	1431/60211	1643/93663	-16.476	-15.307	1.35486
SRX1670211	Rad21	ES cells	34052	1396/60211	1596/93663	-16.4738	-15.3057	1.36064
SRX7685634	Rad21	ES cells	37339	1522/60211	1766/93663	-16.4618	-15.2947	1.34065
SRX5858856	Smc1a	ES cells	44106	1266/60211	1424/93663	-16.4484	-15.2822	1.38298
SRX7685633	Rad21	ES cells	31195	1335/60211	1516/93663	-16.4294	-15.2641	1.36985
SRX8642888	Rad21	ES cells	27968	1263/60211	1420/93663	-16.4187	-15.2544	1.38359
SRX672415	Ctcf	ES cells	17249	754/60211	761/93663	-16.4155	-15.2521	1.54127
SRX213792	Biotin	ES cells	11214	338/60211	264/93663	-16.389	-15.2265	1.99161
SRX11237499	Ctcf	ES cells	20576	1019/60211	1100/93663	-16.3687	-15.2072	1.44103
SRX149639	Stag1	ES cells	44813	1514/60211	1757/93663	-16.342	-15.1814	1.34044
SRX11221879	Med1	ES cells	18012	749/60211	756/93663	-16.3189	-15.1592	1.54118
SRX13439999	Ctcf	mESC derived neural cells	29283	1188/60211	1322/93663	-16.3148	-15.1561	1.3979
SRX7622759	Rad21	ES cells	34749	1439/60211	1657/93663	-16.2961	-15.1384	1.35092
SRX11237520	Smc3	ES cells	28358	1271/60211	1433/93663	-16.2953	-15.1384	1.37972
SRX5077380	Ctcf	ES cells	32842	1320/60211	1499/93663	-16.2426	-15.0866	1.36982
SRX10560015	Ctcf	ES cells	79961	2557/60211	3195/93663	-16.2224	-15.0673	1.24495
SRX15652623	Rad21	ES cells	20714	924/60211	980/93663	-16.2171	-15.0629	1.46669
SRX1670215	Rad21	ES cells	35058	1434/60211	1652/93663	-16.2062	-15.053	1.3503
SRX5858850	Ctcf	ES cells	13818	729/60211	733/93663	-16.1653	-15.013	1.54709
SRX214067	Pou5f1	F9	24055	830/60211	860/93663	-16.1593	-15.0079	1.50132
SRX11237494	Rad21	ES cells	28454	1294/60211	1466/93663	-16.1314	-14.9809	1.37307
SRX5850134	Nrf1	ES cells	3599	177/60211	99/93663	-16.0976	-14.948	2.78119
SRX1080393	Tcf3	Embryoid Bodies	38236	1325/60211	1508/93663	-16.0963	-14.9476	1.36681
SRX12124784	Rad21	EpiLC	21004	902/60211	953/93663	-16.0921	-14.9443	1.47233
SRX3175620	Setd1a	ES cells	7387	342/60211	271/93663	-16.0902	-14.9433	1.96313
SRX125274	Ctcf	mESC derived neural cells	38115	1327/60211	1511/93663	-16.0704	-14.9244	1.36615
SRX9567800	Rad21	ES cells	15319	785/60211	804/93663	-16.0676	-14.9225	1.51882
SRX5077379	Ctcf	ES cells	30827	1271/60211	1436/93663	-16.0623	-14.9181	1.37684
SRX149640	Stag2	ES cells	40980	1392/60211	1598/93663	-16.0613	-14.918	1.35505
SRX14601068	Rad21	ES cells	25673	1219/60211	1368/93663	-16.0059	-14.8635	1.38615
SRX15652627	Rad21	ES cells	32844	1379/60211	1582/93663	-15.996	-14.8545	1.35597
SRX15652591	Ctcf	ES cells	20217	898/60211	949/93663	-15.9823	-14.8416	1.47198
SRX11237506	Rad21	ES cells	32111	1381/60211	1584/93663	-15.9801	-14.8403	1.35622
SRX7622750	Stag2	ES cells	31601	1360/60211	1557/93663	-15.9431	-14.8042	1.35876
SRX9751555	Ctcf	iPS cells	35026	1378/60211	1582/93663	-15.8658	-14.7278	1.35499
SRX4578586	Epitope tags	ES cells	9750	439/60211	383/93663	-15.8491	-14.712	1.78303
SRX14601074	Rad21	ES cells	22099	1058/60211	1159/93663	-15.8408	-14.7046	1.42002
SRX8332834	Ctcf	mESC derived haematopoietic progenitor	24517	1111/60211	1228/93663	-15.8355	-14.7001	1.40737
SRX104394	Rad21	ES cells	38953	1375/60211	1579/93663	-15.8257	-14.6912	1.35461
SRX20248690	Rad21	ES cells	39204	1528/60211	1785/93663	-15.8188	-14.6852	1.33161
SRX10134087	Ctcf	mESCs, differentiated	54378	2097/60211	2565/93663	-15.8085	-14.6758	1.27175
SRX7622758	Rad21	ES cells	29677	1311/60211	1495/93663	-15.7409	-14.609	1.36412
SRX4167114	Med1	ES cells	12740	492/60211	447/93663	-15.7344	-14.6034	1.71218
SRX8642891	Rad21	ES cells	23768	1075/60211	1183/93663	-15.727	-14.5969	1.41357
SRX3430144	Rad21	ES cells	25698	1128/60211	1253/93663	-15.7203	-14.591	1.40039
SRX022688	Smc1a	ES cells	10768	565/60211	535/93663	-15.7133	-14.5849	1.64281
SRX5817868	Zic2	ES cells	6314	331/60211	261/93663	-15.7018	-14.5742	1.97278
SRX9567791	Ctcf	ES cells	21662	889/60211	942/93663	-15.6696	-14.5429	1.46806
SRX20248706	Rad21	ES cells	38820	1548/60211	1815/93663	-15.6636	-14.5378	1.32674
SRX12124913	Rad21	Germline stem cell-like cells	9239	487/60211	442/93663	-15.6456	-14.5206	1.71395
SRX7988734	Epitope tags	ES cells	17083	732/60211	743/93663	-15.6346	-14.5105	1.53255
SRX13440009	Ctcf	ES cells	20542	900/60211	957/93663	-15.6315	-14.5082	1.46293
SRX14601064	Rad21	ES cells	21815	1108/60211	1228/93663	-15.6175	-14.4951	1.40357
SRX19320248	Rad21	ES cells	41237	1637/60211	1937/93663	-15.6069	-14.4853	1.31465
SRX4232696	Tet2	ES cells	22905	823/60211	858/93663	-15.5945	-14.4738	1.49212
SRX10560013	Ctcf	ES cells	71542	2440/60211	3047/93663	-15.5855	-14.4661	1.24569
SRX2762152	Setd1a	ES cells	17865	946/60211	1017/93663	-15.5851	-14.4661	1.44698
SRX5850137	Nrf1	ES cells	5818	275/60211	201/93663	-15.577	-14.4588	2.12828
SRX11237536	Rad21	ES cells	35848	1495/60211	1745/93663	-15.5531	-14.4357	1.33272
SRX5125620	Smc1a	ES cells	21258	921/60211	985/93663	-15.5126	-14.3961	1.45451
SRX19767094	Ctcf	ES cells	31671	1238/60211	1402/93663	-15.4828	-14.3671	1.37361
SRX12204132	Ctcf	ES cells	39680	1533/60211	1798/93663	-15.4784	-14.3636	1.32631
SRX14601073	Rad21	ES cells	25283	1195/60211	1345/93663	-15.4578	-14.3438	1.38209
ERX2087274	Rad21	ES cells	27886	1156/60211	1294/93663	-15.4547	-14.3415	1.38968
SRX15057960	Zic3	mESCs, differentiated	14082	577/60211	552/93663	-15.4402	-14.3279	1.62603
SRX7622752	Rad21	ES cells	20169	1005/60211	1096/93663	-15.4202	-14.3087	1.42642
SRX8332837	Ctcf	mESC derived haematopoietic progenitor	24953	1100/60211	1221/93663	-15.3993	-14.2886	1.40142
SRX5435985	Stag2	ES cells	12568	657/60211	652/93663	-15.3906	-14.2807	1.56751
SRX11237518	Rad21	ES cells	34144	1460/60211	1701/93663	-15.3807	-14.2717	1.33518
SRX12197069	Nrf1	ES cells	6622	487/60211	444/93663	-15.3738	-14.2656	1.70623
SRX7856886	Ctcf	ES cells	12668	587/60211	565/93663	-15.3638	-14.2564	1.61615
SRX5436003	Stag2	ES cells	32438	1377/60211	1590/93663	-15.3474	-14.2408	1.34719
SRX7622753	Rad21	ES cells	17125	920/60211	986/93663	-15.3417	-14.2359	1.45145
SRX11221954	Taf12	ES cells	17914	655/60211	650/93663	-15.3354	-14.2305	1.56755
SRX10641331	Ctcf	ES cells	13716	681/60211	682/93663	-15.3184	-14.2143	1.5533
SRX14601066	Pds5b	ES cells	18541	931/60211	1001/93663	-15.3134	-14.2101	1.4468
SRX14601057	Pds5a	ES cells	15678	790/60211	820/93663	-15.3047	-14.2022	1.49867
SRX12142045	Zic2	mESCs, differentiated	8158	364/60211	301/93663	-15.2999	-14.1982	1.88117
SRX19320245	Rad21	ES cells	39125	1506/60211	1765/93663	-15.2848	-14.1839	1.32731
SRX11221923	Ercc3	ES cells	13835	396/60211	338/93663	-15.2518	-14.1518	1.82251
SRX7622755	Rad21	ES cells	29716	1307/60211	1498/93663	-15.2511	-14.1518	1.35724
SRX11221878	Med1	ES cells	26882	1110/60211	1236/93663	-15.2488	-14.1503	1.397
SRX19320251	Rad21	ES cells	43102	1720/60211	2057/93663	-15.2466	-14.149	1.30073
SRX2402716	Rad21	ES cells	23068	1073/60211	1187/93663	-15.2451	-14.1483	1.40618
SRX5252267	Rad21	ES cells	27712	1069/60211	1182/93663	-15.2244	-14.1284	1.40687
SRX114998	5-hmC	ES cells	98832	1989/60211	3845/93663	-15.2209	-14.1257	0.804694
SRX8642887	Rad21	ES cells	38433	1499/60211	1757/93663	-15.2193	-14.1249	1.32716
SRX11237530	Rad21	ES cells	38587	1578/60211	1865/93663	-15.1948	-14.1011	1.3162
SRX1997144	Ep300	Embryoid Bodies	36610	1109/60211	1236/93663	-15.1772	-14.0845	1.39574
SRX5125624	Smc1a	ES cells	13118	665/60211	664/93663	-15.1766	-14.0845	1.55792
SRX214080	Pou5f1	ES cells	24450	708/60211	718/93663	-15.1574	-14.0661	1.53391
SRX7856900	Rad21	ES cells	23479	955/60211	1035/93663	-15.1355	-14.045	1.43534
SRX17066027	Ctcf	mESC derived erythroid cells	51167	1624/60211	1928/93663	-15.1336	-14.0439	1.3103
SRX7622756	Rad21	ES cells	27800	1230/60211	1397/93663	-15.1204	-14.0315	1.36962
SRX9641479	Rad21	ES cells	27132	1186/60211	1339/93663	-15.0994	-14.0113	1.37783
SRX10641285	Ctcf	ES cells	10654	538/60211	508/93663	-15.0898	-14.0025	1.64744
SRX1670223	Rad21	ES cells	30728	1399/60211	1624/93663	-15.082	-13.9954	1.34006
SRX8626588	Rad21	ES cells	22019	999/60211	1093/93663	-15.0783	-13.9925	1.4218
SRX5125727	Ctcf	iPS cells	38858	1564/60211	1848/93663	-15.0713	-13.9863	1.31652
SRX2440070	Smc1a	ES cells	15415	698/60211	707/93663	-15.0679	-13.9837	1.53578
SRX15652625	Rad21	ES cells	26624	1139/60211	1277/93663	-15.0579	-13.9745	1.38747
SRX10641279	Ctcf	ES cells	11163	554/60211	528/93663	-15.0537	-13.971	1.63218
SRX14601075	Rad21	ES cells	24617	1146/60211	1287/93663	-15.0326	-13.9507	1.38515
SRX5358272	Ctcf	mESCs, differentiated	45368	1683/60211	2012/93663	-15.0063	-13.9252	1.30121
SRX3602896	Ctcf	iPS cells	19841	864/60211	919/93663	-15.0026	-13.9227	1.46248
SRX6831863	Rad21	ES cells	22136	1024/60211	1127/93663	-15.0023	-13.9227	1.41341
SRX19147966	Ctcf	EpiLC	21077	899/60211	964/93663	-14.9864	-13.9076	1.45069
SRX9641482	Rad21	ES cells	42358	1573/60211	1862/93663	-14.9774	-13.8994	1.31414
SRX7622757	Rad21	ES cells	28051	1229/60211	1398/93663	-14.9767	-13.8994	1.36753
ERX2087275	Rad21	ES cells	29429	1206/60211	1368/93663	-14.9719	-13.8954	1.37137
SRX149001	Ell3	ES cells	14114	448/60211	402/93663	-14.9515	-13.8758	1.73358
SRX7622747	Stag1	ES cells	39152	1616/60211	1921/93663	-14.9446	-13.8703	1.3086
SRX19320244	Rad21	ES cells	19411	896/60211	961/93663	-14.9445	-13.8703	1.45036
SRX470063	Epitope tags	ES cells	12416	613/60211	602/93663	-14.9146	-13.8411	1.584
SRX20248700	Rad21	ES cells	37938	1534/60211	1810/93663	-14.9098	-13.8371	1.31838
SRX130018	Stag2	ES cells	28074	1046/60211	1157/93663	-14.9044	-13.8325	1.40634
SRX14601060	Pds5b	ES cells	22027	1051/60211	1164/93663	-14.9031	-13.8319	1.40457
SRX14601065	Pds5b	ES cells	19180	948/60211	1029/93663	-14.9004	-13.83	1.43313
SRX19320249	Rad21	ES cells	32038	1329/60211	1533/93663	-14.8996	-13.8299	1.34857
SRX477545	Tgif1	ES cells	12479	492/60211	455/93663	-14.8787	-13.8098	1.68208
SRX4580513	Smarca4	ES cells	32083	1450/60211	1697/93663	-14.8512	-13.783	1.32916
SRX7546913	Zic3	ES cells	4341	287/60211	219/93663	-14.8238	-13.7564	2.03859
SRX3602907	Ctcf	iPS cells	23898	1068/60211	1188/93663	-14.8009	-13.7342	1.39845
SRX1519391	Biotin	ES cells	13065	525/60211	496/93663	-14.7464	-13.6805	1.64653
SRX6831862	Rad21	ES cells	35137	1442/60211	1689/93663	-14.7245	-13.6593	1.32809
SRX14601071	Rad21	ES cells	28022	1248/60211	1428/93663	-14.7185	-13.6541	1.3595
SRX12142046	Zic3	mESCs, differentiated	19904	779/60211	814/93663	-14.7129	-13.6492	1.48869
SRX390394	Tcf12	ES cells	91580	2418/60211	3037/93663	-14.7115	-13.6486	1.23852
SRX16815350	Pou5f1	ES cells	92358	2661/60211	3380/93663	-14.6959	-13.6337	1.22467
SRX10560010	Smc1a	ES cells	59627	1849/60211	2247/93663	-14.65	-13.5885	1.28005
SRX7622760	Rad21	ES cells	16460	825/60211	873/93663	-14.6409	-13.5802	1.47005
SRX5401519	Ctcf	ES cells	20267	1043/60211	1158/93663	-14.6036	-13.5436	1.4011
SRX110151	Ctcf	ES cells	15349	735/60211	759/93663	-14.5938	-13.5345	1.50639
SRX5371704	Sp3	ES cells	15080	776/60211	811/93663	-14.5913	-13.5328	1.48845
SRX5817867	Zic2	ES cells	7522	371/60211	315/93663	-14.5609	-13.5031	1.83213
SRX15652619	Rad21	ES cells	31063	1285/60211	1481/93663	-14.5414	-13.4843	1.34971
SRX5358271	Ctcf	mESCs, differentiated	40354	1566/60211	1862/93663	-14.5047	-13.4484	1.30829
SRX19320250	Rad21	ES cells	34397	1501/60211	1773/93663	-14.5023	-13.4467	1.31693
SRX7622748	Rad21	ES cells	29169	1349/60211	1568/93663	-14.4977	-13.4428	1.33831
SRX13440032	Maz	ES cells	8816	349/60211	291/93663	-14.4026	-13.3485	1.86563
SRX823726	Aff3	ES cells	10482	323/60211	262/93663	-14.3347	-13.2813	1.91776
SRX3430132	Rad21	ES cells	25064	1067/60211	1194/93663	-14.3156	-13.2629	1.39012
SRX10641283	Ctcf	ES cells	10803	534/60211	511/93663	-14.3117	-13.2597	1.6256
SRX5858854	Ctcf	ES cells	17465	886/60211	957/93663	-14.291	-13.2398	1.44017
SRX7622744	Rad21	ES cells	25487	1194/60211	1363/93663	-14.2771	-13.2266	1.3627
SRX2152805	Kmt2b	ES cells	13979	457/60211	419/93663	-14.2753	-13.2255	1.69666
SRX10641287	Ctcf	ES cells	13733	650/60211	657/93663	-14.1973	-13.1482	1.53901
SRX8626591	Rad21	ES cells	17219	813/60211	864/93663	-14.194	-13.1456	1.46376
SRX5435981	Stag1	ES cells	16428	785/60211	828/93663	-14.1882	-13.1405	1.47479
SRX15652628	Rad21	ES cells	33171	1390/60211	1629/93663	-14.1725	-13.1256	1.32735
SRX9641470	Rad21	ES cells	30157	1249/60211	1439/93663	-14.1691	-13.1229	1.35019
SRX499126	Ep300	EpiLC	32582	1276/60211	1476/93663	-14.1312	-13.0857	1.3448
SRX5401522	Ctcf	ES cells	17458	905/60211	984/93663	-14.1265	-13.0817	1.43069
SRX10641332	Ctcf	ES cells	18029	802/60211	851/93663	-14.1223	-13.0782	1.46601
SRX499130	Otx2	EpiLC	40288	1547/60211	1843/93663	-14.1021	-13.0587	1.30574
SRX868178	Rxra	ES cells	138361	761/60211	799/93663	-14.0915	-13.0488	1.4816
SRX11221952	Taf12	ES cells	20190	712/60211	736/93663	-14.0827	-13.0407	1.50485
SRX19320246	Rad21	ES cells	32802	1351/60211	1578/93663	-14.0495	-13.0082	1.3318
SRX11237507	Smc1a	ES cells	25106	1058/60211	1186/93663	-14.0417	-13.0011	1.38769
SRX214082	Pou5f1	ES cells	38246	1242/60211	1432/93663	-14.0315	-12.9916	1.34918
SRX10157266	Banp	ES cells	43908	1569/60211	1875/93663	-14.0175	-12.9783	1.30171
SRX337184	Ctcf	ES cells	18004	807/60211	859/93663	-14.0162	-12.9777	1.46141
SRX13476141	Ctcf	mESC derived neural cells	27175	1043/60211	1167/93663	-14.0151	-12.9773	1.39029
SRX3730212	Ep300	ES cells	18650	649/60211	658/93663	-14.0013	-12.9642	1.5343
SRX868177	Fgfr1	ES cells	151728	970/60211	1071/93663	-13.9853	-12.9489	1.40888
SRX5858851	Ctcf	ES cells	16854	829/60211	887/93663	-13.9769	-12.9412	1.45386
SRX15057954	Zic2	mESCs, differentiated	4486	200/60211	132/93663	-13.9307	-12.8957	2.35694
SRX470061	Epitope tags	ES cells	17929	788/60211	836/93663	-13.9145	-12.8802	1.46626
SRX8582162	Rad21	ES cells	16832	738/60211	771/93663	-13.9057	-12.8721	1.489
SRX5252269	Rad21	ES cells	25047	1012/60211	1128/93663	-13.9035	-12.8706	1.39561
SRX3544081	Ctcf	ES cells	17738	707/60211	733/93663	-13.8676	-12.8357	1.5004
SRX5251393	Smad3	Embryoid Bodies	27285	1064/60211	1197/93663	-13.8672	-12.8357	1.38274
SRX5401524	Smc1a	ES cells	18903	889/60211	967/93663	-13.8663	-12.8355	1.4301
SRX9567803	Ctcf	ES cells	16458	713/60211	740/93663	-13.8514	-12.8213	1.49882
SRX5817870	Zic2	ES cells	7753	395/60211	349/93663	-13.8483	-12.8189	1.76061
SRX1670201	Med12	ES cells	14175	673/60211	690/93663	-13.8387	-12.8099	1.51725
SRX080169	Ctcf	ES cells	37720	1522/60211	1815/93663	-13.816	-12.7879	1.30446
SRX1670219	Rad21	ES cells	24100	1119/60211	1271/93663	-13.8065	-12.7791	1.36955
SRX14601059	Pds5b	ES cells	19477	965/60211	1068/93663	-13.7956	-12.7689	1.40556
SRX19767091	Ctcf	ES cells	30030	1164/60211	1332/93663	-13.7458	-12.7198	1.35938
SRX022047	Tbp	ES cells	13437	508/60211	486/93663	-13.7422	-12.7169	1.626
SRX9641217	Sox2	EpiLC	5225	234/60211	169/93663	-13.7196	-12.6949	2.15388
SRX5371697	Sp3	ES cells	26565	1197/60211	1377/93663	-13.6998	-12.6758	1.35224
SRX19320243	Rad21	ES cells	28782	1152/60211	1318/93663	-13.6644	-12.6411	1.35966
SRX19320247	Rad21	ES cells	41873	1635/60211	1973/93663	-13.6584	-12.6358	1.28909
SRX4397584	Pou5f1	iPS cells	27397	907/60211	994/93663	-13.6361	-12.6146	1.41943
SRX5926395	Med24	ES cells	31742	1299/60211	1516/93663	-13.6359	-12.6146	1.33291
SRX6831866	Smc1a	ES cells	12681	622/60211	628/93663	-13.6082	-12.5876	1.54072
SRX11221877	Med1	ES cells	28527	1169/60211	1341/93663	-13.6044	-12.5849	1.35606
SRX695695	Zic2	ES cells	10694	520/60211	502/93663	-13.6042	-12.5849	1.61136
SRX9450254	Setd1a	ES cells	14927	490/60211	465/93663	-13.5989	-12.5803	1.63921
SRX6915176	Ctcf	ES cells	17846	882/60211	962/93663	-13.5439	-12.526	1.42622
SRX468970	Klf5	ES cells	17044	608/60211	612/93663	-13.5181	-12.5008	1.54541
SRX9641476	Rad21	ES cells	34018	1354/60211	1594/93663	-13.4441	-12.4275	1.32136
SRX9641473	Rad21	ES cells	32603	1314/60211	1540/93663	-13.4005	-12.3846	1.32729
SRX9567818	Rad21	ES cells	18237	820/60211	884/93663	-13.3875	-12.3722	1.44296
SRX12204131	Ctcf	ES cells	19996	857/60211	933/93663	-13.3457	-12.3311	1.42887
SRX14601058	Pds5a	ES cells	17386	847/60211	920/93663	-13.344	-12.3301	1.43215
SRX8687397	Ctcf	ES cells	19156	935/60211	1035/93663	-13.3431	-12.3298	1.40528
SRX10157268	Banp	ES cells	36792	1377/60211	1627/93663	-13.3386	-12.326	1.31655
SRX13440001	Ctcf	mESC derived neural cells	25621	1040/60211	1174/93663	-13.3219	-12.3099	1.37803
SRX5371703	Sp3	ES cells	14743	799/60211	858/93663	-13.3155	-12.3042	1.44861
SRX5251396	Smad4	Embryoid Bodies	11294	518/60211	502/93663	-13.3098	-12.2992	1.60516
SRX10641419	Ctcf	ES cells	14413	733/60211	773/93663	-13.2988	-12.2888	1.47508
SRX11221880	Med1	ES cells	7174	313/60211	259/93663	-13.2915	-12.2828	1.87991
SRX15057959	Zic2	mESCs, differentiated	7765	313/60211	259/93663	-13.2915	-12.2828	1.87991
SRX1519392	Biotin	ES cells	5230	206/60211	142/93663	-13.2861	-12.2781	2.25669
SRX8626587	Rad21	ES cells	14227	697/60211	727/93663	-13.2806	-12.2732	1.49139
SRX15652622	Rad21	ES cells	26972	1112/60211	1271/93663	-13.2704	-12.2637	1.36098
SRX4167125	Gtf2b	ES cells	16430	602/60211	607/93663	-13.2399	-12.2338	1.54277
SRX3751911	Brd9	ES cells	9562	466/60211	440/93663	-13.2356	-12.2302	1.6475
SRX10157269	Banp	ES cells	23367	947/60211	1053/93663	-13.2277	-12.2229	1.39899
SRX3602908	Ctcf	iPS cells	16212	738/60211	781/93663	-13.1901	-12.186	1.46993
SRX12260419	Ctcf	mESC derived erythroid cells	44318	1513/60211	1816/93663	-13.1787	-12.1759	1.29603
SRX17066025	Ctcf	mESC derived erythroid cells	44318	1513/60211	1816/93663	-13.1787	-12.1759	1.29603
SRX2830663	Setd1a	ES cells	10985	534/60211	524/93663	-13.1621	-12.1599	1.58527
SRX149638	Brd4	ES cells	15026	721/60211	760/93663	-13.1467	-12.1452	1.47575
SRX16815352	Pou5f1	ES cells	56263	1711/60211	2089/93663	-13.1309	-12.13	1.2741
SRX5371705	Sp3	ES cells	15222	795/60211	855/93663	-13.1169	-12.1166	1.44642
SRX1080403	Smad2	Embryoid Bodies	10303	401/60211	363/93663	-13.1128	-12.1132	1.71842
SRX13440006	Ctcf	mESC derived neural cells	23734	978/60211	1095/93663	-13.0962	-12.0974	1.38937
SRX4017943	Pou5f1	ES cells	27241	738/60211	782/93663	-13.0957	-12.0974	1.46805
SRX8642889	Rad21	ES cells	21589	1012/60211	1141/93663	-13.0766	-12.0789	1.37971
SRX15652624	Rad21	ES cells	24933	1082/60211	1235/93663	-13.0459	-12.0488	1.36286
SRX466434	Epitope tags	ES cells	18256	732/60211	775/93663	-13.0262	-12.0298	1.46927
SRX091892	Taf3	ES cells	24921	598/60211	605/93663	-13.0043	-12.0085	1.53758
SRX14601062	Pds5a	ES cells	16590	792/60211	854/93663	-12.9719	-11.9767	1.44265
SRX7176622	Ssrp1	ES cells	6900	252/60211	193/93663	-12.9411	-11.9466	2.03112
SRX7685623	Rad21	ES cells	16014	727/60211	770/93663	-12.9311	-11.9372	1.46871
SRX5401520	Ctcf	ES cells	12776	687/60211	720/93663	-12.8765	-11.8832	1.48428
SRX4167126	Gtf2b	ES cells	13715	497/60211	481/93663	-12.8547	-11.8621	1.60732
SRX130019	Stag1	ES cells	25462	956/60211	1070/93663	-12.8473	-11.8553	1.38984
SRX5817881	Zic2	ES cells	3806	223/60211	163/93663	-12.8393	-11.8479	2.12819
SRX8582166	Rad21	ES cells	13029	596/60211	605/93663	-12.8245	-11.8338	1.53244
SRX3141583	Ctcf	P19	21226	867/60211	954/93663	-12.8114	-11.8213	1.41372
SRX7856899	Rad21	ES cells	12571	580/60211	585/93663	-12.8012	-11.8119	1.54228
SRX1280434	Nrf1	ES cells	11785	522/60211	513/93663	-12.8008	-11.8119	1.58287
SRX4551478	Ctcf	ES cells	10174	572/60211	575/93663	-12.7912	-11.803	1.54746
SRX977370	Epitope tags	iPSC intermediates	47870	1592/60211	1932/93663	-12.7903	-11.8027	1.28182
SRX8754231	Runx1	ES cells	3918	110/60211	52/93663	-12.7893	-11.8023	3.29065
SRX4674465	Ctcf	Embryoid Bodies	46670	1755/60211	2157/93663	-12.7852	-11.7988	1.26567
SRX5926390	Med1	ES cells	28122	1097/60211	1259/93663	-12.7788	-11.7931	1.35542
SRX4167133	Taf2	ES cells	10090	266/60211	210/93663	-12.7387	-11.7536	1.9704
SRX3101083	Smad4	Embryoid Bodies	11273	513/60211	502/93663	-12.7257	-11.7412	1.58967
SRX9567805	Rad21	ES cells	17728	862/60211	949/93663	-12.7169	-11.733	1.41297
SRX15652620	Rad21	ES cells	26491	1063/60211	1215/93663	-12.6879	-11.7046	1.36097
SRX4506784	Smarca4	ES cells	13026	633/60211	653/93663	-12.6754	-11.6927	1.50794
SRX5670841	Ctcf	ES cells	11599	491/60211	476/93663	-12.6631	-11.6811	1.6046
SRX4167128	Gtf2b	ES cells	15211	523/60211	516/93663	-12.6475	-11.6661	1.57668
SRX14601069	Rad21	ES cells	22423	1078/60211	1237/93663	-12.5686	-11.5878	1.35563
SRX4506776	Brd4	ES cells	8916	397/60211	363/93663	-12.5646	-11.5844	1.70128
SRX2440051	Smc1a	EpiSC	11464	564/60211	568/93663	-12.5474	-11.5678	1.54462
SRX9567813	Ctcf	ES cells	22810	1034/60211	1179/93663	-12.5317	-11.5527	1.36427
SRX868179	Nr4a1	ES cells	154027	858/60211	946/93663	-12.5304	-11.552	1.41087
SRX4580516	Brd9	ES cells	8752	420/60211	391/93663	-12.5092	-11.5314	1.67096
SRX13408978	Ctcf	Embryoid Bodies	11601	561/60211	565/93663	-12.5062	-11.5291	1.54457
SRX11540062	Sox2	EpiLC	3291	172/60211	112/93663	-12.4946	-11.5181	2.38893
SRX10641417	Ctcf	ES cells	8476	458/60211	437/93663	-12.4874	-11.5115	1.63033
SRX994813	Nrf1	ES cells	8276	410/60211	379/93663	-12.4821	-11.5068	1.68282
SRX11221951	Taf12	ES cells	20126	683/60211	720/93663	-12.4641	-11.4894	1.47564
SRX7988733	Epitope tags	ES cells	4064	202/60211	143/93663	-12.443	-11.4689	2.19739
SRX11221953	Taf12	ES cells	14300	514/60211	507/93663	-12.4393	-11.4658	1.57706
SRX10641421	Ctcf	ES cells	15350	753/60211	811/93663	-12.4071	-11.4342	1.44433
SRX5371695	Sp3	ES cells	25693	1098/60211	1267/93663	-12.3889	-11.4166	1.34809
SRX16815349	Pou5f1	ES cells	94578	2675/60211	3463/93663	-12.3834	-11.4117	1.20161
SRX977380	Pou5f1	iPS cells	23740	815/60211	892/93663	-12.3786	-11.4075	1.4213
SRX8332825	Ctcf	mESC derived haematopoietic progenitor	8925	513/60211	506/93663	-12.3624	-11.3919	1.5771
SRX6915175	Ctcf	ES cells	15986	778/60211	845/93663	-12.3093	-11.3394	1.43224
SRX5401523	Ctcf	ES cells	12973	715/60211	763/93663	-12.2983	-11.329	1.45772
SRX9567793	Rad21	ES cells	14189	710/60211	757/93663	-12.2956	-11.3269	1.459
SRX2388540	Biotin	ES cells	10627	463/60211	446/93663	-12.2923	-11.3242	1.61487
SRX14601076	Rad21	ES cells	24821	1143/60211	1329/93663	-12.287	-11.3195	1.33787
SRX19767092	Ctcf	ES cells	30201	1151/60211	1341/93663	-12.2592	-11.2923	1.33518
SRX5926394	Med24	ES cells	29167	1164/60211	1359/93663	-12.2487	-11.2827	1.33237
SRX16989257	Tbp	ES cells	16116	567/60211	575/93663	-12.2484	-11.2827	1.53394
SRX5436004	Smc1a	ES cells	20508	1039/60211	1191/93663	-12.2302	-11.2651	1.35705
SRX5388086	Trim28	ES cells	14700	458/60211	440/93663	-12.2236	-11.259	1.61922
SRX1080404	Smad2	Embryoid Bodies	4193	168/60211	109/93663	-12.2206	-11.2566	2.39759
SRX13476143	Ctcf	mESC derived neural cells	18354	753/60211	814/93663	-12.2141	-11.2507	1.43901
SRX6831867	Smc1a	ES cells	106829	3547/60211	4719/93663	-12.211	-11.2482	1.16924
SRX11123486	Wiz	ES cells	12046	653/60211	685/93663	-12.2064	-11.2442	1.48291
SRX9567809	Rad21	ES cells	11947	547/60211	551/93663	-12.2013	-11.2397	1.54429
SRX5388092	Trim28	ES cells	12010	280/60211	230/93663	-12.1984	-11.2374	1.89375
SRX4232700	Epitope tags	ES cells	35180	986/60211	1121/93663	-12.1677	-11.2073	1.36824
SRX8687402	Ctcf	ES cells	12666	684/60211	726/93663	-12.136	-11.1761	1.46559
SRX4551477	Ctcf	ES cells	13884	719/60211	771/93663	-12.1176	-11.1583	1.45066
SRX499129	Otx2	EpiLC	39809	1456/60211	1759/93663	-12.116	-11.1573	1.28762
SRX14601072	Rad21	ES cells	23318	1073/60211	1238/93663	-12.1052	-11.1471	1.34825
SRX11221949	Taf12	ES cells	25698	1009/60211	1153/93663	-12.09	-11.1325	1.3613
SRX2790846	Ctcf	ES cells	11878	627/60211	654/93663	-12.0611	-11.1042	1.49136
SRX6915174	Ctcf	ES cells	16711	809/60211	889/93663	-12.0393	-11.0829	1.41559
ERX1493888	Epitope tags	ES cells	2694	75/60211	26/93663	-12.0222	-11.0664	4.48725
SRX5436002	Stag1	ES cells	30677	1349/60211	1614/93663	-12.0202	-11.065	1.30017
SRX11221958	Taf12	ES cells	22239	653/60211	687/93663	-12.0126	-11.058	1.47859
SRX11540073	Sox2	EpiLC	3170	163/60211	105/93663	-12.0032	-11.0491	2.41485
SRX9567794	Ctcf	ES cells	13432	599/60211	619/93663	-11.9875	-11.034	1.50532
SRX2638678	Htatsf1	ES cells	4869	240/60211	187/93663	-11.9624	-11.0095	1.99647
SRX11237496	Smc3	ES cells	14206	729/60211	786/93663	-11.932	-10.9797	1.44277
SRX13476142	Ctcf	mESC derived neural cells	15326	690/60211	736/93663	-11.9274	-10.9757	1.45836
SRX3666117	Epitope tags	ES cells	2914	143/60211	86/93663	-11.9216	-10.9704	2.5866
SRX20081640	Ctcf	ES cells	42327	1693/60211	2092/93663	-11.8699	-10.9193	1.25889
SRX14601061	Pds5a	ES cells	10773	560/60211	571/93663	-11.8685	-10.9185	1.52561
SRX482878	Rnf2	ES cells	12297	408/60211	383/93663	-11.859	-10.9095	1.65712
SRX994814	Nrf1	ES cells	9419	450/60211	434/93663	-11.8519	-10.903	1.61293
SRX5435980	Stag1	ES cells	7797	447/60211	431/93663	-11.8155	-10.8672	1.61333
SRX9567797	Rad21	ES cells	10916	599/60211	622/93663	-11.769	-10.8212	1.49806
SRX15652590	Ctcf	ES cells	13123	609/60211	634/93663	-11.7639	-10.8167	1.49424
SRX8332840	Rad21	mESC derived haematopoietic progenitor	17929	885/60211	994/93663	-11.7572	-10.8106	1.385
SRX214068	Pou5f1	F9	27055	718/60211	775/93663	-11.7543	-10.8083	1.44117
SRX10641392	Ctcf	ES cells	8753	485/60211	478/93663	-11.7527	-10.8072	1.57836
SRX7988743	Epitope tags	ES cells	14907	614/60211	641/93663	-11.747	-10.8021	1.49006
SRX14601070	Rad21	ES cells	27499	1257/60211	1494/93663	-11.7375	-10.7931	1.30881
SRX4167127	Gtf2b	ES cells	17277	592/60211	613/93663	-11.7354	-10.7921	1.50229
SRX9567796	Rad21	ES cells	11393	610/60211	636/93663	-11.7353	-10.7921	1.49199
SRX214079	Pou5f1	ES cells	10056	361/60211	328/93663	-11.7264	-10.7837	1.71209
SRX13440027	Maz	ES cells	1733	89/60211	38/93663	-11.7163	-10.7742	3.64333
SRX1080407	Smad2	Embryoid Bodies	3681	158/60211	102/93663	-11.7016	-10.7601	2.40962
SRX1080406	Smad2	Embryoid Bodies	12564	466/60211	456/93663	-11.6967	-10.7557	1.58969
SRX3544084	Ctcf	ES cells	7433	348/60211	313/93663	-11.687	-10.7466	1.72953
SRX12963302	Ctcf	ES cells	12083	563/60211	577/93663	-11.6842	-10.7443	1.51784
SRX213834	Supt5	ES cells	15063	443/60211	428/93663	-11.675	-10.7358	1.6101
SRX11540074	Sox2	EpiLC	3598	178/60211	122/93663	-11.6746	-10.7358	2.26962
SRX20081639	Ctcf	ES cells	42744	1689/60211	2091/93663	-11.6727	-10.7345	1.25652
SRX5926393	Med24	ES cells	24738	994/60211	1140/93663	-11.6721	-10.7345	1.35636
SRX4159343	Epitope tags	F9	38344	641/60211	676/93663	-11.6696	-10.7325	1.47504
SRX5358275	Smc1a	mESCs, differentiated	14273	669/60211	713/93663	-11.6627	-10.7262	1.45958
SRX5125732	Ctcf	ES cells	67997	2335/60211	3000/93663	-11.6372	-10.7012	1.21076
SRX15652626	Rad21	ES cells	21046	882/60211	992/93663	-11.6366	-10.7012	1.38309
SRX213813	Supt5	ES cells	15745	461/60211	450/93663	-11.625	-10.6907	1.5936
SRX754574	Ctcf	mESCs, differentiated	8970	461/60211	450/93663	-11.625	-10.6907	1.5936
SRX5251394	Smad3	Embryoid Bodies	40412	1593/60211	1959/93663	-11.59	-10.6562	1.26495
SRX5371702	Sp3	ES cells	14300	720/60211	780/93663	-11.5407	-10.6075	1.43592
SRX11221914	Taf12	ES cells	16897	633/60211	668/93663	-11.5341	-10.6014	1.47407
SRX647909	Epitope tags	ES cells	4702	167/60211	112/93663	-11.5116	-10.5795	2.31948
SRX10157267	Banp	ES cells	28841	1067/60211	1241/93663	-11.5102	-10.5786	1.33747
SRX4506782	Smarca4	ES cells	13144	620/60211	652/93663	-11.5066	-10.5756	1.47923
SRX5401525	Smc1a	ES cells	20265	914/60211	1036/93663	-11.5058	-10.5753	1.37239
SRX499128	Pou5f1	EpiLC	34323	1303/60211	1562/93663	-11.484	-10.5541	1.29764
SRX2486173	Epitope tags	ES cells	18980	842/60211	942/93663	-11.4197	-10.4903	1.39044
SRX477546	Hdac1	ES cells	8465	384/60211	359/93663	-11.3761	-10.4473	1.66391
SRX390397	Tcf12	mESC derived endodermal cells	78682	2051/60211	2606/93663	-11.3658	-10.4375	1.22429
SRX4397583	Pou5f1	iPS cells	42241	1475/60211	1802/93663	-11.3398	-10.412	1.2733
SRX213830	Pou5f1	ES cells	14865	551/60211	566/93663	-11.3328	-10.4056	1.51435
SRX2744934	Adnp	ES cells	13009	470/60211	465/93663	-11.3319	-10.4052	1.57231
SRX390392	Tcf12	ES cells	83236	2275/60211	2923/93663	-11.3304	-10.4043	1.21072
SRX8332826	Ctcf	mESC derived haematopoietic progenitor	8177	467/60211	461/93663	-11.3163	-10.3907	1.57583
SRX997156	Brd2	ES cells	17657	525/60211	534/93663	-11.3136	-10.3886	1.52936
SRX657153	Med1	ES cells	14447	719/60211	783/93663	-11.2764	-10.3519	1.42843
SRX9567808	Rad21	ES cells	7418	387/60211	364/93663	-11.2553	-10.3313	1.65387
SRX1659049	Ep300	mESC derived neural cells	16186	628/60211	666/93663	-11.2328	-10.3094	1.46682
SRX3430140	Rad21	ES cells	18135	790/60211	877/93663	-11.2153	-10.2924	1.40126
SRX5926391	Med1	ES cells	28019	1087/60211	1273/93663	-11.2106	-10.2882	1.32829
SRX12124783	Rad21	EpiLC	11354	552/60211	569/93663	-11.1992	-10.2774	1.5091
SRX3827067	Ctcf	ES cells	9085	488/60211	488/93663	-11.1948	-10.2735	1.55558
SRX11221950	Taf12	ES cells	10750	375/60211	350/93663	-11.171	-10.2502	1.66669
SRX10111409	Chd8	ES cells	14868	394/60211	373/93663	-11.157	-10.2368	1.64316
SRX4403303	Chd4	ES cells	14378	406/60211	388/93663	-11.1298	-10.2101	1.62775
SRX12197081	Nrf1	mESC derived neural cells	14777	653/60211	699/93663	-11.1266	-10.2074	1.45321
SRX022691	Smc3	ES cells	9649	495/60211	498/93663	-11.113	-10.1944	1.54621
SRX8332839	Rad21	mESC derived haematopoietic progenitor	12059	644/60211	688/93663	-11.1077	-10.1905	1.45609
SRX8332827	Ctcf	mESC derived haematopoietic progenitor	7722	446/60211	437/93663	-11.1075	-10.1905	1.58762
SRX9567801	Rad21	ES cells	10094	556/60211	575/93663	-11.1075	-10.1905	1.50418
SRX214083	Pou5f1	ES cells	14824	538/60211	553/93663	-11.0968	-10.1803	1.51338
SRX13439112	Ctcf	ES cells	29643	1243/60211	1488/93663	-11.0824	-10.1664	1.29945
SRX13439111	Ctcf	ES cells	28818	1203/60211	1434/93663	-11.0743	-10.1589	1.30499
SRX125273	Smc1a	mESC derived neural cells	28626	1013/60211	1176/93663	-11.0615	-10.1466	1.33997
SRX390112	GFP	ES cells	207894	3057/60211	5518/93663	-11.0486	-10.1342	0.861799
SRX2790849	Ctcf	ES cells	11166	595/60211	626/93663	-11.0415	-10.1276	1.47855
SRX9450255	Setd1a	ES cells	15698	515/60211	524/93663	-11.0358	-10.1225	1.52886
SRX1738884	Zfp281	ES cells	9466	449/60211	442/93663	-11.0114	-10.0986	1.58022
SRX1704884	Smc3	ES cells	22275	933/60211	1070/93663	-11.0097	-10.0974	1.35641
SRX13439114	Ctcf	ES cells	41452	1698/60211	2119/93663	-11.003	-10.0912	1.24652
SRX5926389	Med1	ES cells	22162	899/60211	1025/93663	-10.9957	-10.0845	1.36436
SRX4159301	Epitope tags	F9	60736	1365/60211	1657/93663	-10.9906	-10.0799	1.28145
SRX12124814	Rad21	PGCLC	12003	593/60211	624/93663	-10.9872	-10.077	1.4783
SRX5578685	Biotin	ES cells	15551	277/60211	236/93663	-10.9817	-10.072	1.82583
SRX11540092	Sox2	EpiLC	8687	355/60211	328/93663	-10.9635	-10.0543	1.68363
SRX7546912	Zic3	ES cells	14843	608/60211	644/93663	-10.9579	-10.0493	1.46862
SRX2752336	Kmt2c	ES cells	12792	472/60211	471/93663	-10.9438	-10.0357	1.55888
SRX868174	Fgfr1	ES cells	96291	510/60211	519/93663	-10.9398	-10.0322	1.5286
SRX20081637	Ctcf	ES cells	40050	1596/60211	1979/93663	-10.9362	-10.0291	1.25452
SRX997154	Brd2	ES cells	8477	259/60211	216/93663	-10.9283	-10.0217	1.86526
SRX6033283	RAF1	ES cells	18224	568/60211	593/93663	-10.9255	-10.0195	1.49
SRX16815353	Pou5f1	ES cells	77488	1736/60211	2175/93663	-10.9095	-10.004	1.2416
SRX7546911	Zic3	ES cells	9575	433/60211	423/93663	-10.898	-9.99298	1.59235
SRX4159319	Epitope tags	F9	35763	868/60211	986/93663	-10.8678	-9.9633	1.36941
SRX4735796	Srf	iPS cells	10369	504/60211	513/93663	-10.8564	-9.95241	1.52829
SRX1670205	Med12	ES cells	10885	493/60211	499/93663	-10.8241	-9.92063	1.53688
SRX1688261	Smc3	ES cells	6348	337/60211	308/93663	-10.8204	-9.91744	1.70205
SRX13440030	Maz	mESC derived neural cells	18724	709/60211	777/93663	-10.8149	-9.91245	1.41944
SRX868619	Zfp217	ES cells	13905	537/60211	555/93663	-10.8084	-9.90646	1.50513
SRX10134093	Rad21	mESCs, differentiated	30453	1280/60211	1544/93663	-10.8046	-9.90318	1.2896
SRX15652621	Rad21	ES cells	17301	763/60211	847/93663	-10.8025	-9.90158	1.40131
SRX13476140	Ctcf	mESC derived neural cells	18720	775/60211	864/93663	-10.7737	-9.87329	1.39534
SRX11221948	Taf12	ES cells	29078	1164/60211	1387/93663	-10.7365	-9.8366	1.30548
SRX13476150	Maz	ES cells	7073	210/60211	162/93663	-10.732	-9.83262	2.01649
SRX13440029	Maz	mESC derived neural cells	11731	418/60211	407/93663	-10.7315	-9.83262	1.59762
SRX9641215	Sox2	EpiLC	7365	309/60211	275/93663	-10.7182	-9.81983	1.74791
SRX10134091	Rad21	mESCs, differentiated	25455	1114/60211	1319/93663	-10.7105	-9.81264	1.31381
SRX4403326	Sin3a	ES cells	8668	296/60211	260/93663	-10.6976	-9.80024	1.77097
SRX12124815	Rad21	PGCLC	11151	551/60211	574/93663	-10.6963	-9.79945	1.49325
SRX319957	Nanog	ES cells	5020	191/60211	142/93663	-10.6947	-9.79835	2.09236
SRX10641284	Ctcf	ES cells	5904	313/60211	281/93663	-10.6588	-9.76296	1.73273
SRX2486172	Epitope tags	ES cells	11236	475/60211	479/93663	-10.6203	-9.72496	1.54259
SRX20081638	Ctcf	ES cells	42958	1694/60211	2123/93663	-10.6003	-9.70547	1.24124
SRX091896	Tbp	ES cells	6947	209/60211	162/93663	-10.5937	-9.69937	2.00689
SRX12197087	Nrf1	mESC derived neural cells	15268	677/60211	738/93663	-10.5804	-9.68657	1.427
SRX5784015	Brd4	ES cells	13646	257/60211	216/93663	-10.5566	-9.66327	1.85085
SRX11221910	Taf1	ES cells	8780	309/60211	277/93663	-10.5487	-9.65587	1.73529
SRX499125	Ep300	EpiLC	19155	801/60211	902/93663	-10.5445	-9.65217	1.3814
SRX5173623	Epitope tags	PGCLC	1156	63/60211	21/93663	-10.5429	-9.65107	4.66674
SRX11221957	Taf12	ES cells	24862	728/60211	806/93663	-10.5045	-9.61317	1.40504
SRX4403332	Sin3a	ES cells	3094	148/60211	98/93663	-10.49	-9.59917	2.34924
SRX9567814	Ctcf	ES cells	15735	767/60211	858/93663	-10.4785	-9.58817	1.39059
SRX10134089	Rad21	mESCs, differentiated	26784	1164/60211	1392/93663	-10.4746	-9.58477	1.30079
SRX10641420	Ctcf	ES cells	4720	274/60211	237/93663	-10.4609	-9.57157	1.79843
SRX482879	Rnf2	ES cells	16990	525/60211	544/93663	-10.4597	-9.57086	1.50125
SRX5173621	Epitope tags	PGCLC	1675	78/60211	33/93663	-10.4516	-9.56326	3.67682
SRX5358278	Smc1a	mESCs, differentiated	1594	107/60211	58/93663	-10.4357	-9.54785	2.86978
SRX8332824	Ctcf	mESC derived haematopoietic progenitor	8405	474/60211	480/93663	-10.4225	-9.53515	1.53613
SRX208055	Rara	ES cells	14742	279/60211	243/93663	-10.3958	-9.50894	1.78604
SRX5578686	Biotin	ES cells	7885	156/60211	107/93663	-10.3792	-9.49284	2.26795
SRX9411720	Kmt2d	EpiLC	20661	495/60211	507/93663	-10.3365	-9.45063	1.51876
SRX1670185	Med12	ES cells	7585	294/60211	261/93663	-10.3217	-9.43632	1.75226
SRX12142050	Zic2	mESCs, differentiated	7647	322/60211	294/93663	-10.3104	-9.42552	1.70373
SRX11540091	Sox2	EpiLC	7628	315/60211	286/93663	-10.3032	-9.41881	1.71331
SRX13476151	Maz	mESC derived neural cells	9799	308/60211	278/93663	-10.2966	-9.4127	1.72345
SRX10134095	Rad21	mESCs, differentiated	22019	986/60211	1154/93663	-10.2901	-9.40669	1.32912
SRX10560008	Smc1a	ES cells	20646	825/60211	938/93663	-10.2839	-9.40098	1.36818
SRX10445776	Epitope tags	ES cells	499	51/60211	13/93663	-10.2672	-9.38516	6.10266
SRX8642890	Rad21	ES cells	38632	1387/60211	1704/93663	-10.2671	-9.38516	1.26619
SRX3544080	Ctcf	ES cells	10904	447/60211	448/93663	-10.245	-9.36354	1.55211
SRX4159292	Epitope tags	F9	65117	1061/60211	1256/93663	-10.2429	-9.36193	1.31407
SRX5401527	Smc1a	ES cells	10599	545/60211	572/93663	-10.2208	-9.34032	1.48215
SRX3341233	Bap1	ES cells	3077	144/60211	95/93663	-10.1934	-9.31341	2.35793
SRX5463231	Mtf2	ES cells	268	37/60211	5/93663	-10.1902	-9.31069	11.5113
ERX1493880	Epitope tags	ES cells	2748	76/60211	32/93663	-10.1881	-9.30908	3.6945
SRX10641286	Ctcf	ES cells	2958	187/60211	141/93663	-10.166	-9.28746	2.06307
SRX1670181	Med12	ES cells	8525	366/60211	349/93663	-10.1592	-9.28115	1.63135
SRX5388089	Epitope tags	ES cells	358	44/60211	9/93663	-10.1447	-9.26713	7.60506
SRX950721	Epitope tags	ES cells	639	63/60211	22/93663	-10.1097	-9.23261	4.45461
SRX8601665	Sumo1	ES cells	1664	85/60211	40/93663	-10.1006	-9.224	3.30561
SRX10445775	Epitope tags	ES cells	439	46/60211	10/93663	-10.0842	-9.20808	7.15567
SRX5371698	Sp1	ES cells	13909	664/60211	729/93663	-10.0784	-9.20276	1.41688
SRX14059485	Arid2	ES cells	4349	145/60211	97/93663	-10.0651	-9.18994	2.32535
SRX13439115	Ctcf	ES cells	28375	1270/60211	1547/93663	-10.0254	-9.15072	1.27704
SRX104386	Ncapd3	ES cells	9384	326/60211	302/93663	-10.0019	-9.1277	1.6792
SRX10445752	Epitope tags	ES cells	599	50/60211	13/93663	-9.9818	-9.10808	5.983
SRX015832	Kdm5a	ES cells	4406	181/60211	136/93663	-9.97211	-9.09906	2.07029
SRX9641169	Sox2	ES cells	5276	221/60211	180/93663	-9.97182	-9.09906	1.90991
SRX142127	Kat8	ES cells	12106	341/60211	321/93663	-9.96547	-9.09319	1.6525
SRX997153	Brd2	ES cells	13430	440/60211	443/93663	-9.96353	-9.09173	1.54505
SRX2037659	Aff3	ES cells	6717	213/60211	171/93663	-9.93645	-9.06512	1.93765
SRX404387	Nsl1	ES cells	2861	141/60211	94/93663	-9.93308	-9.06223	2.33337
SRX8330921	Cirh1a	ES cells	744	54/60211	16/93663	-9.92691	-9.05653	5.25008
SRX754572	Ctcf	ES cells	17292	860/60211	991/93663	-9.90067	-9.03077	1.34995
SRX7856885	Ctcf	ES cells	1447	98/60211	52/93663	-9.89602	-9.02659	2.93167
SRX9326773	Smc3	ES cells	10852	532/60211	560/93663	-9.89237	-9.02342	1.4778
SRX14812493	Epitope tags	ES cells	3025	69/60211	27/93663	-9.86231	-8.99383	3.97537
SRX4397585	Pou5f1	iPS cells	10438	506/60211	527/93663	-9.86007	-8.99207	1.49359
SRX7685626	Rad21	ES cells	15874	572/60211	612/93663	-9.85026	-8.9832	1.45391
SRX8687398	Ctcf	ES cells	10481	572/60211	612/93663	-9.85026	-8.9832	1.45391
SRX5388084	Epitope tags	ES cells	571	62/60211	22/93663	-9.84844	-8.98185	4.38391
SRX9326769	Smc3	ES cells	9603	485/60211	501/93663	-9.82165	-8.95563	1.5059
SRX2793944	Cdk8	ES cells	6819	242/60211	205/93663	-9.82127	-8.95563	1.83634
SRX977371	Epitope tags	iPSC intermediates	38013	1172/60211	1417/93663	-9.81979	-8.95462	1.28662
SRX8626583	Rad21	ES cells	6769	384/60211	375/93663	-9.81269	-8.94799	1.59291
SRX10978089	Banp	ES cells	13583	538/60211	570/93663	-9.75408	-8.88985	1.46825
SRX8332841	Ctcf	mESC derived haematopoietic progenitor	10951	582/60211	626/93663	-9.75319	-8.88942	1.44624
SRX248287	Nanog	Embryoid Bodies	55205	1125/60211	1354/93663	-9.7417	-8.8784	1.29249
SRX13440010	Ctcf	mESC derived neural cells	14425	628/60211	687/93663	-9.72463	-8.8618	1.42199
SRX16101713	Smarca4	ES cells	17472	724/60211	813/93663	-9.72113	-8.85877	1.38529
SRX5371696	Sp3	ES cells	17988	810/60211	928/93663	-9.70266	-8.84076	1.35778
SRX10445772	Epitope tags	ES cells	466	49/60211	13/93663	-9.69336	-8.83193	5.86334
SRX16101712	Smarca4	ES cells	16469	641/60211	704/93663	-9.68636	-8.8254	1.41637
SRX8626569	Rad21	ES cells	10518	572/60211	615/93663	-9.65417	-8.79387	1.44682
SRX175893	GFP	ES cells	94168	1540/60211	2913/93663	-9.6539	-8.79387	0.82238
SRX8332842	Ctcf	mESC derived haematopoietic progenitor	9862	520/60211	548/93663	-9.6456	-8.78603	1.4761
SRX977378	Pou5f1	iPSC intermediates	43230	1317/60211	1621/93663	-9.64474	-8.78563	1.26385
SRX2831952	Kmt2d	ES cells	13918	452/60211	462/93663	-9.64384	-8.7852	1.52191
ERX2021915	Rad21	ES cells	12275	598/60211	649/93663	-9.63166	-8.77348	1.43334
SRX039347	Tet1	ES cells	19830	665/60211	737/93663	-9.6256	-8.76788	1.40361
SRX2545591	Tet3	ES cells	14679	441/60211	448/93663	-9.60947	-8.75221	1.53127
SRX4159352	Epitope tags	F9	57492	915/60211	1070/93663	-9.6079	-8.75111	1.33024
SRX5371694	Sp3	ES cells	18741	812/60211	932/93663	-9.60429	-8.74796	1.35529
SRX1602645	Kmt2b	ES cells	13075	399/60211	396/93663	-9.59973	-8.74386	1.56736
SRX977368	Epitope tags	iPSC intermediates	84222	2376/60211	3118/93663	-9.59235	-8.73694	1.18539
SRX997155	Brd2	ES cells	17010	412/60211	412/93663	-9.59096	-8.73601	1.55558
SRX11123484	Wiz	ES cells	8894	500/60211	523/93663	-9.58127	-8.72677	1.48717
SRX14134858	Supt5	ES cells	10564	345/60211	330/93663	-9.55684	-8.7028	1.62629
SRX2744935	Adnp	ES cells	6163	270/60211	240/93663	-9.54981	-8.69623	1.75003
SRX9326771	Smc3	ES cells	8492	427/60211	431/93663	-9.53387	-8.68075	1.54114
SRX3175619	Setd1a	ES cells	9428	419/60211	422/93663	-9.50527	-8.6526	1.54452
SRX14046358	Ctcf	mESC derived neural cells	14364	654/60211	724/93663	-9.47147	-8.61926	1.40518
SRX7856888	Ctcf	ES cells	4999	279/60211	251/93663	-9.4687	-8.61695	1.72911
SRX334975	Klf5	ES cells	29203	897/60211	1049/93663	-9.45322	-8.60192	1.33018
SRX7622761	Rad21	ES cells	7984	451/60211	463/93663	-9.45232	-8.60148	1.51526
SRX868176	Nr4a1	ES cells	136628	727/60211	821/93663	-9.43722	-8.58683	1.37747
SRX8832796	Epitope tags	ES cells	9642	227/60211	191/93663	-9.43524	-8.58531	1.84878
SRX023512	Wdr5	ES cells	1354	67/60211	27/93663	-9.39875	-8.54927	3.86014
SRX5173625	Epitope tags	ES cells	6775	207/60211	168/93663	-9.39476	-8.54573	1.9167
SRX1280435	Nrf1	ES cells	15879	648/60211	718/93663	-9.38936	-8.54079	1.40392
SRX977379	Pou5f1	iPSC intermediates	43915	1370/60211	1701/93663	-9.36708	-8.51896	1.25288
SRX4397586	Pou5f1	iPS cells	9474	477/60211	497/93663	-9.3662	-8.51853	1.49298
SRX10978090	Banp	ES cells	12371	487/60211	509/93663	-9.36164	-8.51442	1.48834
SRX10641333	Ctcf	ES cells	6159	299/60211	276/93663	-9.35988	-8.51311	1.68521
SRX017058	Nelfa	ES cells	17251	609/60211	667/93663	-9.34963	-8.50331	1.42031
SRX5276471	Myc	ES cells	10069	383/60211	379/93663	-9.34903	-8.50316	1.572
SRX11540063	Sox2	EpiLC	3729	160/60211	117/93663	-9.34251	-8.49709	2.12729
SRX7988739	Epitope tags	ES cells	8837	282/60211	256/93663	-9.33145	-8.4866	1.71357
SRX026257	Smad3	ES cells	4612	190/60211	150/93663	-9.33112	-8.4866	1.9704
SRX7815874	Ctcf	ES cells	10911	540/60211	578/93663	-9.32908	-8.48501	1.45331
SRX214084	Pou5f1	ES cells	11630	389/60211	386/93663	-9.31564	-8.47201	1.56767
SRX5358276	Smc1a	mESCs, differentiated	10902	538/60211	576/93663	-9.27521	-8.43203	1.45295
SRX6032074	Sox2	ES cells	27338	971/60211	1153/93663	-9.27309	-8.43036	1.31003
SRX5926392	Med24	ES cells	26520	1060/60211	1274/93663	-9.26308	-8.42079	1.29428
SRX10111410	Chd8	ES cells	16816	473/60211	493/93663	-9.25705	-8.41521	1.49247
SRX11417002	GFP	ES cells	17768	734/60211	834/93663	-9.25115	-8.40975	1.36906
SRX8736762	Kmt2d	Embryoid Bodies	9502	400/60211	401/93663	-9.23211	-8.39116	1.5517
SRX8582154	Rad21	ES cells	2057	129/60211	85/93663	-9.22824	-8.38773	2.36082
SRX12276171	Ctcf	ES cells	7775	340/60211	327/93663	-9.22217	-8.38211	1.61742
SRX16101720	Smarca4	ES cells	10180	421/60211	428/93663	-9.22065	-8.38103	1.53014
SRX10445770	Epitope tags	ES cells	369	43/60211	10/93663	-9.21813	-8.37895	6.68899
SRX3430142	Rad21	ES cells	17649	784/60211	901/93663	-9.2074	-8.36867	1.35358
SRX8332838	Rad21	mESC derived haematopoietic progenitor	13347	687/60211	772/93663	-9.20614	-8.36785	1.3843
SRX11221940	Taf12	ES cells	19699	840/60211	977/93663	-9.1811	-8.34325	1.33745
SRX5173620	Epitope tags	PGCLC	775	53/60211	17/93663	-9.17309	-8.33568	4.84975
SRX12798485	Brd4	ES cells	14667	472/60211	493/93663	-9.17164	-8.33467	1.48932
SRX9567816	Rad21	ES cells	13430	685/60211	771/93663	-9.14392	-8.30739	1.38206
SRX2440044	Grhl2	EpiSC	2009	111/60211	68/93663	-9.13094	-8.29485	2.53925
SRX4159287	Epitope tags	F9	525	50/60211	15/93663	-9.12928	-8.29363	5.18527
SRX5578666	Biotin	ES cells	754	52/60211	16/93663	-9.12724	-8.29203	5.05563
SRX1639485	Epop	ES cells	17091	546/60211	589/93663	-9.11237	-8.2776	1.44201
SRX2539828	Kdm5c	ES cells	26195	1015/60211	1216/93663	-9.10506	-8.27073	1.29845
SRX1049915	Epitope tags	ES cells	3782	103/60211	60/93663	-9.09676	-8.26314	2.67041
SRX17024519	Smc1a	ES cells	18529	763/60211	875/93663	-9.0966	-8.26314	1.35647
SRX5358279	Smc1a	mESCs, differentiated	9130	462/60211	481/93663	-9.09407	-8.26105	1.49413
SRX9450257	Nelfe	ES cells	21342	719/60211	817/93663	-9.06504	-8.2327	1.36899
SRX14812492	Epitope tags	ES cells	2119	58/60211	21/93663	-9.06485	-8.2327	4.29636
SRX466438	Epitope tags	ES cells	2316	153/60211	111/93663	-9.06422	-8.23251	2.14418
SRX468969	Klf4	ES cells	20883	653/60211	729/93663	-9.0613	-8.23002	1.39341
SRX6827273	Klf4	ES cells	84631	2128/60211	2780/93663	-9.04822	-8.21737	1.19075
SRX9641458	Rad21	ES cells	19178	864/60211	1012/93663	-9.0448	-8.21439	1.32808
SRX13440033	Maz	mESC derived neural cells	6415	195/60211	157/93663	-9.03919	-8.20921	1.93209
SRX11525492	Sumo1	ES cells	61647	1315/60211	1632/93663	-9.0359	-8.20636	1.25342
SRX1688263	Smc3	ES cells	12264	545/60211	589/93663	-9.03312	-8.20401	1.43937
SRX1049917	Epitope tags	ES cells	3329	91/60211	49/93663	-9.02836	-8.20015	2.88893
SRX10280237	Etv2	Embryoid Bodies	348	39/60211	8/93663	-9.02797	-8.20015	7.58345
SRX9784434	Epitope tags	ES cells	570	39/60211	8/93663	-9.02797	-8.20015	7.58345
SRX11417015	GFP	ES cells	14770	645/60211	720/93663	-9.00892	-8.18154	1.39354
SRX868181	Fgfr1	ES cells	11532	404/60211	409/93663	-9.00123	-8.17428	1.53656
SRX9695055	Ctcf	iPS cells	9527	453/60211	471/93663	-8.98631	-8.15979	1.49613
SRX1688323	Gtf3c1	ES cells	17657	584/60211	640/93663	-8.97734	-8.15125	1.41947
SRX8003651	Dendra2	ES cells	8733	380/60211	379/93663	-8.97641	-8.15075	1.55968
SRX1036413	Pou5f1	ES cells	5046	223/60211	190/93663	-8.97539	-8.15016	1.82576
SRX319553	Kat5	ES cells	17969	481/60211	507/93663	-8.97378	-8.14926	1.47581
SRX13332923	Dnttip1	ES cells	22309	995/60211	1191/93663	-8.97364	-8.14926	1.29958
SRX3825670	Mta2	ES cells	5398	211/60211	176/93663	-8.96737	-8.14384	1.86493
SRX4401437	Mta2	ES cells	5398	211/60211	176/93663	-8.96737	-8.14384	1.86493
SRX7988736	Epitope tags	ES cells	6079	260/60211	233/93663	-8.9539	-8.1308	1.73584
SRX2455331	Zfp281	EpiSC	6547	299/60211	280/93663	-8.94251	-8.11984	1.66114
SRX1517381	Epop	ES cells	11137	353/60211	346/93663	-8.93318	-8.11093	1.58705
SRX10641280	Ctcf	ES cells	4703	254/60211	226/93663	-8.92368	-8.10186	1.74831
SRX2528919	Ezh2	ES cells	356	41/60211	9/93663	-8.92229	-8.1009	7.08653
SRX4159254	GFP	ES cells	22025	366/60211	362/93663	-8.91324	-8.09227	1.57277
SRX9695062	Ctcf	iPS cells	10280	578/60211	633/93663	-8.90529	-8.08475	1.42042
SRX16989256	Nanog	ES cells	9015	342/60211	333/93663	-8.89878	-8.07866	1.59762
SRX2545592	Tet3	ES cells	14239	580/60211	636/93663	-8.87156	-8.05186	1.41861
SRX4980239	Hoxb1	ES cells	46452	580/60211	1218/93663	-8.86988	-8.0506	0.740752
SRX2002351	Epitope tags	ES cells	664	45/60211	12/93663	-8.86731	-8.04846	5.83342
SRX1556184	Epitope tags	ES cells	584	49/60211	15/93663	-8.84835	-8.02992	5.08156
SRX10117180	Pcgf1	Embryoid Bodies	297	37/60211	7/93663	-8.84074	-8.02442	8.22235
SRX10445762	Epitope tags	ES cells	330	37/60211	7/93663	-8.84074	-8.02442	8.22235
SRX1404243	Epitope tags	ES cells	322	37/60211	7/93663	-8.84074	-8.02442	8.22235
SRX204801	Epitope tags	ES cells	339	37/60211	7/93663	-8.84074	-8.02442	8.22235
SRX9641189	Tcf3	EpiLC	464	37/60211	7/93663	-8.84074	-8.02442	8.22235
SRX4159350	Epitope tags	F9	16186	344/60211	336/93663	-8.83936	-8.02346	1.59262
SRX8626564	Rad21	ES cells	7314	419/60211	430/93663	-8.83453	-8.01904	1.51579
SRX8687403	Ctcf	ES cells	11972	624/60211	695/93663	-8.83211	-8.01711	1.39666
SRX2440045	Grhl2	EpiSC	1318	74/60211	35/93663	-8.83176	-8.01711	3.28894
SRX4159358	Epitope tags	F9	370	43/60211	11/93663	-8.81724	-8.00301	6.0809
SRX9195290	Epitope tags	ES cells	12925	443/60211	460/93663	-8.80815	-7.99434	1.49809
SRX11417001	GFP	ES cells	21386	939/60211	1119/93663	-8.79175	-7.97836	1.30535
SRX2245718	Brd4	ES cells	14586	462/60211	485/93663	-8.78398	-7.971	1.48181
SRX16101721	Smarca4	ES cells	9884	426/60211	439/93663	-8.78304	-7.97072	1.50951
SRX10560009	Smc1a	ES cells	56028	1796/60211	2315/93663	-8.78286	-7.97072	1.20683
SRX093166	Esrrb	ES cells	14780	427/60211	441/93663	-8.75129	-7.93956	1.5062
SRX4232702	Epitope tags	ES cells	21663	473/60211	500/93663	-8.7394	-7.92809	1.47158
SRX11237512	Rad21	ES cells	4830	297/60211	280/93663	-8.72877	-7.91787	1.65003
SRX4167136	Med26	ES cells	22780	786/60211	913/93663	-8.724	-7.91352	1.3392
SRX695697	Chd4	ES cells	2449	119/60211	78/93663	-8.71725	-7.90718	2.37326
SRX4159318	Epitope tags	ES cells	319	38/60211	8/93663	-8.70761	-7.89796	7.389
SRX5371693	Sp3	ES cells	24132	1066/60211	1294/93663	-8.70663	-7.89739	1.28149
SRX16815354	Pou5f1	ES cells	71174	1576/60211	2006/93663	-8.69826	-7.88943	1.22213
SRX9858286	Trim28	ES cells	59088	846/60211	994/93663	-8.68463	-7.8763	1.32396
SRX882859	Hdac1	mESCs, differentiated	957	64/60211	27/93663	-8.6843	-7.8763	3.6873
SRX8332831	Ctcf	mESC derived haematopoietic progenitor	4018	266/60211	243/93663	-8.68066	-7.87325	1.70282
SRX2388539	Arid3a	ES cells	798	53/60211	18/93663	-8.68043	-7.87325	4.58032
SRX997162	Brd4	ES cells	8530	236/60211	207/93663	-8.67275	-7.86598	1.77351
SRX6716554	Ash2l	ES cells	6436	213/60211	181/93663	-8.66465	-7.85829	1.8306
SRX4096934	Ctcf	ES cells	5005	270/60211	248/93663	-8.65994	-7.85399	1.69357
SRX4403325	Chd4	ES cells	9087	296/60211	279/93663	-8.65271	-7.84717	1.65036
SRX10445763	Epitope tags	ES cells	357	40/60211	9/93663	-8.64849	-7.84336	6.91369
SRX5817864	Zfp281	ES cells	7311	338/60211	331/93663	-8.64393	-7.83921	1.58848
ERX2021912	Ctcf	ES cells	12282	552/60211	603/93663	-8.64162	-7.83731	1.42401
SRX14663246	GFP	ES cells	15178	517/60211	558/93663	-8.63312	-7.82922	1.44128
SRX10641391	Ctcf	ES cells	2707	180/60211	144/93663	-8.63191	-7.82841	1.94447
SRX1556182	Epitope tags	ES cells	849	50/60211	16/93663	-8.62263	-7.82051	4.86119
SRX9172007	Rest	ES cells	718	50/60211	16/93663	-8.62263	-7.82051	4.86119
SRX10280220	Smarca4	Embryoid Bodies	368	41/60211	10/93663	-8.62197	-7.82051	6.37788
SRX12124789	Lmnb1	EpiLC	413	41/60211	10/93663	-8.62197	-7.82051	6.37788
SRX12124855	Lmnb1	PGCLC	510	41/60211	10/93663	-8.62197	-7.82051	6.37788
SRX11540075	Sox2	EpiLC	2898	140/60211	100/93663	-8.61265	-7.812	2.17781
SRX529398	Sox3	mESC derived neural cells	3399	140/60211	100/93663	-8.61265	-7.812	2.17781
SRX047138	Hdac2	ES cells	3607	161/60211	123/93663	-8.60186	-7.80161	2.03617
SRX4159293	Epitope tags	F9	1413	47/60211	14/93663	-8.58897	-7.78913	5.2223
SRX825831	Runx1	mESC derived myeloid progenitors	5804	208/60211	176/93663	-8.58592	-7.78668	1.83841
SRX5817863	Zfp281	ES cells	4445	234/60211	206/93663	-8.58571	-7.78668	1.76702
SRX12142051	Zic3	mESCs, differentiated	14780	525/60211	569/93663	-8.57872	-7.78009	1.43529
SRX9450259	Nelfe	ES cells	13836	365/60211	365/93663	-8.57659	-7.77836	1.55558
SRX9172004	Rest	ES cells	702	48/60211	15/93663	-8.56653	-7.76871	4.97785
SRX214078	Pou5f1	ES cells	36037	1150/60211	1413/93663	-8.55899	-7.76157	1.26604
SRX022048	Tbp	ES cells	6224	209/60211	177/93663	-8.55693	-7.75991	1.83681
SRX823605	Chd4	ES cells	3483	162/60211	124/93663	-8.55569	-7.75907	2.03229
SRX9695060	Ctcf	iPS cells	9859	522/60211	565/93663	-8.54816	-7.75194	1.43719
SRX5088234	Smc1a	ES cells	32788	568/60211	626/93663	-8.5355	-7.73968	1.41145
SRX10157271	Banp	mESC derived neural cells	16275	661/60211	748/93663	-8.53155	-7.73613	1.37465
SRX16057323	Jarid2	ES cells	333	36/60211	7/93663	-8.53083	-7.73582	8.00012
SRX16844923	GFP	ES cells	16688	761/60211	882/93663	-8.52211	-7.72749	1.34217
SRX4167134	Taf2	ES cells	26689	725/60211	834/93663	-8.52102	-7.7268	1.35227
SRX9567804	Rad21	ES cells	8021	437/60211	457/93663	-8.51063	-7.71681	1.4875
SRX11221930	Med4	ES cells	6023	220/60211	190/93663	-8.49119	-7.69777	1.8012
SRX5125725	Ctcf	iPS cells	8172	439/60211	459/93663	-8.48398	-7.69096	1.4878
SRX4017959	Sox2	ES cells	6311	271/60211	251/93663	-8.47483	-7.68221	1.67953
SRX4167135	Med26	ES cells	18180	609/60211	681/93663	-8.47229	-7.68007	1.39111
SRX11221909	Taf1	ES cells	7130	250/60211	226/93663	-8.46815	-7.67632	1.72077
SRX4159340	Epitope tags	F9	43561	778/60211	906/93663	-8.46418	-7.67275	1.33581
SRX10641282	Ctcf	ES cells	3651	214/60211	184/93663	-8.4413	-7.65027	1.80921
SRX12622648	Med14	ES cells	11565	400/60211	411/93663	-8.4315	-7.64086	1.51395
SRX368308	Kat8	mESC derived neural cells	3003	144/60211	106/93663	-8.42426	-7.63402	2.11324
SRX022694	Med1	ES cells	3307	161/60211	124/93663	-8.4158	-7.62595	2.01974
SRX111876	Rbbp5	ES cells	6098	132/60211	93/93663	-8.40005	-7.6106	2.20792
SRX2539827	Kdm5c	ES cells	28654	1133/60211	1394/93663	-8.39457	-7.60551	1.26433
SRX16057321	Mtf2	ES cells	283	37/60211	8/93663	-8.38735	-7.59947	7.19456
SRX19176755	Cbx7	ES cells	345	37/60211	8/93663	-8.38735	-7.59947	7.19456
SRX3021905	Hdac2	mESC derived haemogenic endothelium	392	37/60211	8/93663	-8.38735	-7.59947	7.19456
SRX6879008	Zic3	ES cells	72006	1872/60211	2435/93663	-8.38085	-7.59337	1.19591
SRX2165259	Mbd2	ES cells	618	39/60211	9/93663	-8.36865	-7.58156	6.74084
SRX2916324	Rad21	mESC derived neural cells	12733	594/60211	663/93663	-8.36622	-7.57952	1.39369
SRX2002352	Epitope tags	ES cells	702	49/60211	16/93663	-8.3644	-7.57809	4.76396
SRX5401528	Smc1a	ES cells	8886	468/60211	498/93663	-8.36103	-7.57512	1.46187
SRX4735793	Srf	iPS cells	7320	373/60211	378/93663	-8.34683	-7.56131	1.535
SRX1036419	Ddx21	ES cells	26932	892/60211	1064/93663	-8.33088	-7.54575	1.30411
SRX4594914	Sox2	ES cells	12311	436/60211	458/93663	-8.32923	-7.54449	1.48086
SRX657149	Med1	iPS cells	39659	1382/60211	1743/93663	-8.32295	-7.5386	1.2334
SRX10445747	Epitope tags	ES cells	382	40/60211	10/93663	-8.32105	-7.53768	6.22232
SRX2528920	Ezh2	ES cells	374	40/60211	10/93663	-8.32105	-7.53768	6.22232
SRX3030271	Zbtb2	ES cells	7376	272/60211	253/93663	-8.32086	-7.53768	1.6724
SRX11540061	Sox2	EpiLC	1707	104/60211	65/93663	-8.3144	-7.53161	2.48893
SRX10445774	Epitope tags	ES cells	424	43/60211	12/93663	-8.30183	-7.51943	5.57416
SRX2404542	Sin3a	NSC-derived iPS cells	4505	195/60211	163/93663	-8.29815	-7.51613	1.86097
SRX14833490	Hmga2	ES cells	1371	55/60211	21/93663	-8.2957	-7.51407	4.07414
SRX2793941	Cdk8	ES cells	7557	255/60211	233/93663	-8.28399	-7.50342	1.70246
SRX7268257	Rnf2	Embryoid Bodies	415	42/60211	11/93663	-8.28389	-7.50342	5.93949
SRX9172006	Rest	ES cells	644	42/60211	11/93663	-8.28389	-7.50342	5.93949
SRX319555	Nr0b1	ES cells	13599	468/60211	499/93663	-8.26648	-7.48716	1.45894
SRX3176042	Suz12	ES cells	322	34/60211	6/93663	-8.26647	-7.48716	8.81495
SRX5463238	Jarid2	ES cells	288	34/60211	6/93663	-8.26647	-7.48716	8.81495
SRX5388094	Trim28	ES cells	5084	119/60211	80/93663	-8.24716	-7.46824	2.31392
SRX4594913	Sox2	ES cells	14420	555/60211	613/93663	-8.23426	-7.45572	1.4084
SRX13228164	Ctcf	ES cells	12823	620/60211	699/93663	-8.22965	-7.4515	1.37977
SRX11221932	Taf12	ES cells	20590	812/60211	957/93663	-8.21715	-7.43938	1.31989
SRX027353	Ep300	ES cells	15887	605/60211	679/93663	-8.21041	-7.43303	1.38605
SRX11237500	Rad21	ES cells	2026	137/60211	99/93663	-8.20633	-7.42971	2.15267
SRX2755306	Ctcf	ES cells	1775	137/60211	99/93663	-8.20633	-7.42971	2.15267
SRX5023748	Sox2	ES cells	4748	187/60211	155/93663	-8.2025	-7.42627	1.87673
SRX482054	Tdg	ES cells	18857	583/60211	651/93663	-8.20155	-7.4257	1.39309
SRX754570	Ctcf	ES cells	3684	216/60211	188/93663	-8.19665	-7.42118	1.78726
SRX8332832	Ctcf	mESC derived haematopoietic progenitor	3287	223/60211	196/93663	-8.186	-7.41092	1.76987
SRX13440028	Maz	ES cells	8216	294/60211	282/93663	-8.17019	-7.39549	1.62177
SRX1602658	Kmt2b	ES cells	2480	90/60211	52/93663	-8.15774	-7.38342	2.69235
SRX6033284	RAF1	ES cells	15454	460/60211	491/93663	-8.1307	-7.35676	1.45737
SRX997157	Brd4	ES cells	9318	263/60211	244/93663	-8.11238	-7.33882	1.67671
SRX7687366	Pou5f1	EpiLC	1963	97/60211	59/93663	-8.09245	-7.31927	2.55748
SRX9641201	Sox2	EpiLC	3105	118/60211	80/93663	-8.08865	-7.31585	2.29448
SRX10445749	Epitope tags	ES cells	398	38/60211	9/93663	-8.08362	-7.31196	6.568
SRX2741880	Lmnb1	ES cells	372	38/60211	9/93663	-8.08362	-7.31196	6.568
SRX8297737	Epitope tags	mESC derived cardiac cells	391	38/60211	9/93663	-8.08362	-7.31196	6.568
SRX3141818	Kdm6a	ES cells	5486	239/60211	216/93663	-8.07232	-7.30104	1.72122
SRX6608365	Prdm10	ES cells	346	36/60211	8/93663	-8.06766	-7.29714	7.00011
SRX6853316	Suz12	ES cells	286	36/60211	8/93663	-8.06766	-7.29714	7.00011
SRX1688324	Gtf3c1	ES cells	8642	298/60211	288/93663	-8.04545	-7.2753	1.60959
SRX368313	Kansl3	mESC derived neural cells	7769	299/60211	289/93663	-8.02664	-7.25687	1.60941
SRX312229	Max	ES cells	4781	169/60211	136/93663	-8.02585	-7.25646	1.93304
SRX029863	Sin3a	ES cells	4237	184/60211	153/93663	-8.02004	-7.25102	1.87076
SRX10445748	Epitope tags	ES cells	383	39/60211	10/93663	-8.01928	-7.25102	6.06676
SRX3021904	Hdac1	mESC derived haemogenic endothelium	793	39/60211	10/93663	-8.01928	-7.25102	6.06676
SRX2734248	Epitope tags	ES cells	639	42/60211	12/93663	-8.01581	-7.2483	5.44453
SRX9172003	Rest	ES cells	621	42/60211	12/93663	-8.01581	-7.2483	5.44453
SRX5401529	Smc1a	ES cells	8844	476/60211	513/93663	-8.01169	-7.24486	1.44338
SRX110152	Ctcfl	ES cells	165	27/60211	3/93663	-8.01162	-7.24486	14.0002
SRX1035382	Cebpb	mESC derived haematopoietic progenitor	712	44/60211	13/93663	-8.00701	-7.241	5.26504
SRX9172002	Rest	ES cells	631	44/60211	13/93663	-8.00701	-7.241	5.26504
SRX14663241	GFP	ES cells	24410	928/60211	1119/93663	-7.99656	-7.23092	1.29006
SRX11525491	Sumo1	ES cells	61257	1127/60211	1394/93663	-7.98685	-7.22159	1.25763
SRX4017942	Sox2	ES cells	1907	95/60211	58/93663	-7.97944	-7.21455	2.54793
SRX5251387	Smad3	ES cells	23018	876/60211	1049/93663	-7.96598	-7.20146	1.29903
SRX499141	Otx2	ES cells	24322	810/60211	959/93663	-7.964	-7.19985	1.31389
SRX2762150	Kmt2b	ES cells	22300	932/60211	1126/93663	-7.95591	-7.19214	1.28757
SRX3751912	Brd9	ES cells	5003	225/60211	201/93663	-7.92461	-7.16158	1.74132
SRX668247	Cdk8	ES cells	4512	225/60211	201/93663	-7.92461	-7.16158	1.74132
SRX19147965	Ctcf	EpiLC	5842	310/60211	304/93663	-7.91877	-7.15611	1.58628
SRX657147	Med1	iPS cells	32177	958/60211	1162/93663	-7.9168	-7.15451	1.28248
SRX10445764	Epitope tags	ES cells	300	34/60211	7/93663	-7.90241	-7.1416	7.55567
SRX11127137	Rest	mESC derived cardiac cells	344	34/60211	7/93663	-7.90241	-7.1416	7.55567
SRX19176725	Cbx2	EpiLC	347	34/60211	7/93663	-7.90241	-7.1416	7.55567
SRX8297735	Epitope tags	mESC derived cardiac cells	323	34/60211	7/93663	-7.90241	-7.1416	7.55567
SRX9195310	Med1	ES cells	21849	765/60211	899/93663	-7.89775	-7.13748	1.32371
SRX7175335	Yy1	ES cells	11267	219/60211	194/93663	-7.89755	-7.13748	1.75604
SRX13440031	Maz	ES cells	5322	143/60211	108/93663	-7.8932	-7.1335	2.0597
SRX11221933	Taf12	ES cells	18205	703/60211	816/93663	-7.89166	-7.13233	1.34016
SRX823723	Aff3	ES cells	1822	81/60211	45/93663	-7.87236	-7.1135	2.80004
SRX11221912	Taf1	ES cells	5727	209/60211	183/93663	-7.8721	-7.1135	1.77659
SRX213829	Nanog	ES cells	14451	499/60211	545/93663	-7.86493	-7.1067	1.42428
SRX9195285	Epitope tags	ES cells	13164	449/60211	481/93663	-7.85727	-7.09941	1.45209
SRX11540086	Sox2	EpiLC	666	47/60211	16/93663	-7.83958	-7.08245	4.56951
SRX8332844	Ctcf	mESC derived haematopoietic progenitor	488	47/60211	16/93663	-7.83958	-7.08245	4.56951
SRX1688321	Ncaph2	ES cells	17152	648/60211	743/93663	-7.83695	-7.08019	1.35668
SRX977369	Epitope tags	iPSC intermediates	72094	2049/60211	2705/93663	-7.82771	-7.07142	1.17833
SRX11221898	Med4	ES cells	2084	68/60211	33/93663	-7.82745	-7.07142	3.20544
SRX8832797	Epitope tags	ES cells	14383	355/60211	361/93663	-7.82457	-7.06891	1.52973
SRX10157270	Banp	mESC derived neural cells	18394	753/60211	885/93663	-7.81294	-7.05764	1.32356
SRX2831314	Sumo1	ES cells	37673	566/60211	634/93663	-7.80397	-7.04904	1.38874
SRX11540087	Sox2	EpiLC	2434	118/60211	82/93663	-7.80118	-7.04661	2.23852
SRX19176722	Cbx2	EpiLC	324	37/60211	9/93663	-7.79438	-7.04054	6.39516
SRX7845397	Brd4	ES cells	438	37/60211	9/93663	-7.79438	-7.04054	6.39516
SRX426374	Cbx8	ES cells	1131	70/60211	35/93663	-7.78864	-7.03516	3.11116
SRX1670209	Med12	ES cells	10390	401/60211	420/93663	-7.78372	-7.03061	1.48521
SRX590292	Epitope tags	ES cells	1167	52/60211	20/93663	-7.77977	-7.02702	4.04451
SRX3666118	Epitope tags	ES cells	630	43/60211	13/93663	-7.75258	-7.00055	5.14538
SRX9450266	Chd4	ES cells	631	43/60211	13/93663	-7.75258	-7.00055	5.14538
SRX12124922	Lmnb1	Germline stem cell-like cells	468	40/60211	11/93663	-7.74978	-6.9992	5.65665
SRX2165258	Mbd2	ES cells	710	40/60211	11/93663	-7.74978	-6.9992	5.65665
SRX5578673	Biotin	ES cells	440	40/60211	11/93663	-7.74978	-6.9992	5.65665
SRX7268255	Rnf2	ES cells	477	40/60211	11/93663	-7.74978	-6.9992	5.65665
SRX16844901	GFP	ES cells	18951	798/60211	947/93663	-7.74778	-6.99756	1.31083
SRX9195291	Epitope tags	ES cells	9009	304/60211	298/93663	-7.74657	-6.99671	1.5869
SRX5858853	Ctcf	ES cells	9602	516/60211	570/93663	-7.73638	-6.98688	1.40821
SRX12124790	Lmnb1	EpiLC	408	41/60211	12/93663	-7.72866	-6.97952	5.3149
SRX8736743	Kmt2d	mESC derived neural cells	12015	404/60211	424/93663	-7.72624	-6.97746	1.4822
SRX883486	Epitope tags	ES cells	71156	418/60211	442/93663	-7.7255	-6.97718	1.47111
SRX13228088	Sox2	ES cells	38985	1571/60211	2025/93663	-7.72524	-6.97718	1.20682
SRX026255	Smad3	ES cells	4094	168/60211	137/93663	-7.72379	-6.97609	1.90757
SRX9450260	Nelfe	ES cells	15304	438/60211	468/93663	-7.70606	-6.95872	1.45586
SRX2916329	Rad21	mESC derived neural cells	11381	557/60211	624/93663	-7.69025	-6.94327	1.38855
SRX5371699	Sp1	ES cells	294	32/60211	6/93663	-7.68175	-6.93512	8.29642
SRX5023713	Esrrb	ES cells	1358	80/60211	45/93663	-7.67055	-6.92428	2.76547
SRX4403324	Mbd3	ES cells	7054	260/60211	245/93663	-7.66871	-6.9228	1.65082
SRX2916339	Rad21	mESC derived neural cells	10907	527/60211	585/93663	-7.65362	-6.90807	1.40135
SRX3176051	Epitope tags	ES cells	13267	379/60211	394/93663	-7.65229	-6.90709	1.49636
SRX16844920	GFP	ES cells	21218	977/60211	1194/93663	-7.63643	-6.89159	1.27287
SRX6032062	Sox2	ES cells	30643	1106/60211	1373/93663	-7.63382	-6.88933	1.25307
SRX7988742	Epitope tags	ES cells	8627	345/60211	351/93663	-7.63018	-6.88605	1.52899
SRX14663239	GFP	ES cells	16996	584/60211	661/93663	-7.61792	-6.87415	1.37437
SRX6032061	Sox2	ES cells	22124	798/60211	949/93663	-7.61735	-6.87393	1.30806
SRX1093870	Sumo2	ES cells	26015	320/60211	320/93663	-7.61558	-6.87252	1.55558
SRX4397577	Pou5f1	iPS cells	7823	289/60211	281/93663	-7.59716	-6.85445	1.59987
ERX2789786	Hdac3	ES cells	663	53/60211	21/93663	-7.59144	-6.84908	3.92599
SRX19176727	Jarid2	ES cells	341	33/60211	7/93663	-7.58588	-6.84494	7.33345
SRX19176734	Cbx4	ES cells	377	33/60211	7/93663	-7.58588	-6.84494	7.33345
SRX19176759	Phc1	EpiLC	371	33/60211	7/93663	-7.58588	-6.84494	7.33345
SRX5785866	Leo1	ES cells	398	33/60211	7/93663	-7.58588	-6.84494	7.33345
SRX9695056	Ctcf	iPS cells	3794	230/60211	210/93663	-7.56637	-6.82578	1.70373
SRX1670189	Med12	ES cells	7111	266/60211	254/93663	-7.56355	-6.82332	1.62907
SRX9195282	Epitope tags	ES cells	12069	416/60211	442/93663	-7.56299	-6.82311	1.46407
SRX213821	Pou5f1	ES cells	7701	256/60211	241/93663	-7.55042	-6.81124	1.6524
SRX2539820	Hdac1	ES cells	10197	256/60211	241/93663	-7.55042	-6.81124	1.6524
SRX9411717	Kdm1a	EpiLC	16716	431/60211	462/93663	-7.54233	-6.8035	1.4512
SRX997161	Brd4	ES cells	7980	200/60211	175/93663	-7.5325	-6.79402	1.77781
SRX6033282	RAF1	ES cells	16508	508/60211	562/93663	-7.53035	-6.79255	1.40611
SRX997159	Brd2	ES cells	20053	503/60211	555/93663	-7.53032	-6.79255	1.40983
SRX11525495	Sumo1	ES cells	57337	1028/60211	1267/93663	-7.52831	-6.79089	1.26214
SRX11237501	Smc1a	ES cells	13272	385/60211	403/93663	-7.52281	-6.78574	1.4861
SRX7988738	Epitope tags	ES cells	5936	148/60211	116/93663	-7.5208	-6.78409	1.9847
SRX16101716	Smarca4	ES cells	10004	413/60211	439/93663	-7.52046	-6.78409	1.46345
SRX107354	Rxra	F9	15059	145/60211	113/93663	-7.50883	-6.77281	1.9961
SRX15888983	Epitope tags	ES cells	546	36/60211	9/93663	-7.50194	-6.76766	6.22232
SRX373776	Jarid2	ES cells	453	36/60211	9/93663	-7.50194	-6.76766	6.22232
SRX6608366	Prdm10	ES cells	326	36/60211	9/93663	-7.50194	-6.76766	6.22232
SRX7845398	Brd4	ES cells	415	36/60211	9/93663	-7.50194	-6.76766	6.22232
SRX8297732	Epitope tags	mESC derived cardiac cells	365	36/60211	9/93663	-7.50194	-6.76766	6.22232
SRX7988745	Epitope tags	ES cells	2904	55/60211	23/93663	-7.49276	-6.75882	3.71986
SRX1602649	Kmt2b	ES cells	13787	464/60211	505/93663	-7.48925	-6.75566	1.42928
SRX4159306	Epitope tags	ES cells	305	35/60211	8/93663	-7.4868	-6.7546	6.80566
SRX6608367	Prdm10	ES cells	352	35/60211	8/93663	-7.4868	-6.7546	6.80566
SRX6853306	Suz12	ES cells	480	35/60211	8/93663	-7.4868	-6.7546	6.80566
SRX8873449	Banp	ES cells	463	35/60211	8/93663	-7.4868	-6.7546	6.80566
SRX2793945	Cdk8	ES cells	5226	182/60211	154/93663	-7.48415	-6.75229	1.83841
SRX2762151	Kmt2d	ES cells	35248	1416/60211	1813/93663	-7.48102	-6.74951	1.21495
SRX10445760	Epitope tags	ES cells	3623	149/60211	117/93663	-7.47766	-6.7465	1.98104
SRX373775	Jarid2	ES cells	558	39/60211	11/93663	-7.47626	-6.74579	5.51524
SRX7268251	Kdm2b	ES cells	329	39/60211	11/93663	-7.47626	-6.74579	5.51524
SRX5817880	Zic2	ES cells	2637	143/60211	111/93663	-7.46362	-6.73349	2.00403
SRX20248711	Trim28	ES cells	24357	361/60211	373/93663	-7.45686	-6.72707	1.50553
SRX5360258	Isl1	mESC derived cardiac cells	59070	456/60211	495/93663	-7.45285	-6.72341	1.43302
SRX1080398	Tcf3	ES cells	45699	1505/60211	1939/93663	-7.45158	-6.72248	1.2074
SRX9596421	Trim28	ES cells	21060	482/60211	529/93663	-7.44341	-6.71466	1.41737
SRX373773	Jarid2	ES cells	595	40/60211	12/93663	-7.44107	-6.71266	5.18527
SRX9195294	Epitope tags	ES cells	9465	298/60211	294/93663	-7.43952	-6.71145	1.57674
SRX2440054	Grhl2	EpiSC	2792	133/60211	100/93663	-7.42024	-6.69251	2.06892
SRX11717315	Dpy30	ES cells	393	37/60211	10/93663	-7.41581	-6.69048	5.75564
SRX16057324	Jarid2	ES cells	355	37/60211	10/93663	-7.41581	-6.69048	5.75564
SRX16057326	Cbx7	EpiLC	380	37/60211	10/93663	-7.41581	-6.69048	5.75564
SRX1688270	Ssrp1	ES cells	683	37/60211	10/93663	-7.41581	-6.69048	5.75564
SRX204804	Epitope tags	ES cells	1066	37/60211	10/93663	-7.41581	-6.69048	5.75564
SRX7845396	Brd4	ES cells	440	37/60211	10/93663	-7.41581	-6.69048	5.75564
SRX8297733	Epitope tags	mESC derived cardiac cells	436	37/60211	10/93663	-7.41581	-6.69048	5.75564
SRX466437	Epitope tags	ES cells	19347	652/60211	755/93663	-7.41421	-6.68922	1.34336
SRX11417011	GFP	ES cells	6965	259/60211	247/93663	-7.41194	-6.68729	1.63115
SRX7856902	Rad21	ES cells	3732	206/60211	183/93663	-7.41009	-6.68578	1.75109
SRX1602656	Kmt2b	ES cells	17625	505/60211	560/93663	-7.40548	-6.68151	1.4028
SRX695698	Mbd3	ES cells	1662	80/60211	46/93663	-7.39931	-6.67567	2.70536
SRX2762171	Kmt2d	ES cells	42283	1751/60211	2291/93663	-7.39648	-6.67318	1.18892
SRX764230	Epop	ES cells	14132	200/60211	176/93663	-7.38423	-6.66127	1.7677
SRX10641415	Ctcf	ES cells	4850	288/60211	282/93663	-7.38153	-6.65891	1.58868
SRX5023729	Nanog	ES cells	246	31/60211	6/93663	-7.38032	-6.65838	8.03716
SRX5463256	Suz12	ES cells	231	31/60211	6/93663	-7.38032	-6.65838	8.03716
SRX4596008	Pou5f1	ES cells	9298	246/60211	231/93663	-7.36746	-6.64586	1.65659
SRX11417014	GFP	ES cells	11417	451/60211	490/93663	-7.35822	-6.63695	1.43177
SRX9424475	Ep400	ES cells	6083	261/60211	250/93663	-7.34751	-6.62658	1.62403
SRX1049914	Epitope tags	ES cells	2138	89/60211	55/93663	-7.34465	-6.62406	2.51721
SRX4159253	GFP	ES cells	38906	616/60211	708/93663	-7.34142	-6.62116	1.35344
SRX657154	Med1	ES cells	4927	243/60211	228/93663	-7.33284	-6.61292	1.65792
SRX9101841	Kdm2b	ES cells	13382	380/60211	399/93663	-7.32864	-6.60906	1.4815
SRX11221943	Taf12	ES cells	10364	385/60211	405/93663	-7.32757	-6.60844	1.47876
SRX015777	Mtf2	ES cells	479	27/60211	4/93663	-7.32735	-6.60844	10.5002
SRX4159308	Epitope tags	F9	36974	594/60211	679/93663	-7.32259	-6.60401	1.36085
SRX523449	Atrx	ES cells	5195	140/60211	108/93663	-7.32166	-6.60342	2.01649
SRX2873907	Yy1	ES cells	27279	981/60211	1207/93663	-7.30943	-6.59152	1.26431
SRX4159317	Epitope tags	F9	508	45/60211	16/93663	-7.30843	-6.59086	4.37507
SRX12622649	Med14	ES cells	9517	355/60211	368/93663	-7.2725	-6.55526	1.50063
SRX9567790	Ctcf	ES cells	6952	320/60211	324/93663	-7.26912	-6.55268	1.53637
SRX5023739	Pou5f1	ES cells	302	32/60211	7/93663	-7.26891	-6.55268	7.11122
SRX6853314	Suz12	ES cells	323	32/60211	7/93663	-7.26891	-6.55268	7.11122
SRX2199823	Rnf2	ES cells	2443	111/60211	78/93663	-7.2484	-6.53283	2.21371
SRX9731388	Epitope tags	ES cells	4142	111/60211	78/93663	-7.2484	-6.53283	2.21371
SRX868175	Rxra	ES cells	140407	736/60211	872/93663	-7.24229	-6.52706	1.31297
SRX1556183	Epitope tags	ES cells	833	49/60211	19/93663	-7.24101	-6.52611	4.01176
SRX9195280	Epitope tags	ES cells	12318	427/60211	461/93663	-7.23922	-6.52465	1.44085
SRX6071849	Pcgf1	ES cells	12101	468/60211	514/93663	-7.23618	-6.52194	1.41636
SRX466436	Epitope tags	ES cells	6240	326/60211	332/93663	-7.22575	-6.51184	1.52747
SRX4980261	Hoxb1	ES cells	1207	42/60211	14/93663	-7.22043	-6.50686	4.66674
SRX8297731	Epitope tags	mESC derived cardiac cells	376	34/60211	8/93663	-7.21661	-6.50337	6.61121
SRX4159351	Epitope tags	F9	44743	752/60211	894/93663	-7.21421	-6.5013	1.3085
SRX11540053	Ctnnb1	EpiLC	4210	171/60211	144/93663	-7.21187	-6.49929	1.84725
SRX327701	Dnmt3l	ES cells	879	35/60211	9/93663	-7.20728	-6.49545	6.04948
SRX7845393	Brd4	ES cells	458	35/60211	9/93663	-7.20728	-6.49545	6.04948
SRX1688322	Ncaph2	ES cells	6783	200/60211	178/93663	-7.20704	-6.49545	1.74784
SRX11540093	Sox2	EpiLC	4458	184/60211	159/93663	-7.2	-6.48964	1.80017
SRX12124822	Lmnb1	PGCLC	358	38/60211	11/93663	-7.19958	-6.48964	5.37382
SRX16057305	Cbx7	ES cells	346	38/60211	11/93663	-7.19958	-6.48964	5.37382
SRX3666119	Epitope tags	ES cells	544	38/60211	11/93663	-7.19958	-6.48964	5.37382
SRX590293	Epitope tags	ES cells	843	38/60211	11/93663	-7.19958	-6.48964	5.37382
SRX470064	Epitope tags	ES cells	6574	341/60211	351/93663	-7.18804	-6.47875	1.51126
SRX9101864	Kdm2b	ES cells	14050	341/60211	351/93663	-7.18804	-6.47875	1.51126
SRX368299	Kat8	ES cells	2870	128/60211	96/93663	-7.18214	-6.47318	2.07411
SRX9641168	Sox2	ES cells	6248	225/60211	208/93663	-7.17826	-6.46963	1.68272
SRX368309	Kat8	mESC derived neural cells	2711	133/60211	102/93663	-7.17394	-6.46564	2.02835
SRX12142055	Zic3	mESCs, differentiated	9648	355/60211	369/93663	-7.17264	-6.46467	1.49656
SRX12191047	Esrrb	ES cells	8577	397/60211	423/93663	-7.1656	-6.45795	1.45996
SRX8330923	Utp6	ES cells	11737	374/60211	393/93663	-7.16262	-6.4553	1.48037
SRX8332828	Ctcf	mESC derived haematopoietic progenitor	2694	188/60211	164/93663	-7.16174	-6.45492	1.78323
SRX9101843	Ctnnb1	ES cells	13309	412/60211	442/93663	-7.16159	-6.45492	1.45
SRX11525496	Sumo1	ES cells	60303	1229/60211	1557/93663	-7.15508	-6.44894	1.22788
SRX12124921	Lmnb1	Germline stem cell-like cells	458	39/60211	12/93663	-7.15365	-6.44894	5.05563
SRX2744942	Cbx5	ES cells	1225	39/60211	12/93663	-7.15365	-6.44894	5.05563
SRX800822	Smarca4	ES cells	547	39/60211	12/93663	-7.15365	-6.44894	5.05563
SRX9172008	Rest	ES cells	585	39/60211	12/93663	-7.15365	-6.44894	5.05563
SRX9172009	Rest	ES cells	575	39/60211	12/93663	-7.15365	-6.44894	5.05563
SRX4232701	Epitope tags	ES cells	19359	549/60211	622/93663	-7.15313	-6.44874	1.37301
SRX11417012	GFP	ES cells	11591	347/60211	359/93663	-7.15146	-6.4474	1.50358
SRX385945	Usp16	ES cells	2140	86/60211	53/93663	-7.15041	-6.44667	2.52415
SRX7670001	Tbp	ES cells	1305	69/60211	37/93663	-7.13063	-6.42721	2.90095
SRX1342338	Sox2	ES cells	5038	202/60211	181/93663	-7.12222	-6.41913	1.73606
SRX17045821	Nelfe	ES cells	9084	322/60211	328/93663	-7.11449	-6.41172	1.52712
SRX18040252	Sox2	ES cells	14963	665/60211	778/93663	-7.11372	-6.41127	1.32964
SRX11221941	Taf12	ES cells	23155	1000/60211	1238/93663	-7.10903	-6.40691	1.25653
SRX1410922	Pou5f1	EpiSC	34451	845/60211	1024/93663	-7.10646	-6.40466	1.28366
SRX10641281	Ctcf	ES cells	2370	140/60211	110/93663	-7.0957	-6.39422	1.97983
SRX147771	Epitope tags	ES cells	50547	1534/60211	1991/93663	-7.08602	-6.38486	1.19852
SRX9641464	Rad21	ES cells	11506	559/60211	637/93663	-7.08514	-6.38431	1.3651
SRX9567815	Rad21	ES cells	8094	456/60211	501/93663	-7.07991	-6.3794	1.41586
SRX2404541	Sin3a	NSC-derived iPS cells	5809	225/60211	209/93663	-7.04762	-6.34743	1.67467
SRX7669994	Tbp	ES cells	2121	99/60211	66/93663	-7.04642	-6.34656	2.33337
SRX4096931	Ctcf	ES cells	3209	211/60211	192/93663	-7.04611	-6.34656	1.70952
SRX6879009	Pou5f1	ES cells	22440	653/60211	763/93663	-7.03783	-6.3386	1.33132
SRX9641164	Lef1	ES cells	263	20/60211	1/93663	-7.03085	-6.33194	31.1116
SRX9431024	Rcor2	ES cells	6265	215/60211	197/93663	-7.02537	-6.32678	1.69771
SRX16989253	Sox2	ES cells	10484	317/60211	323/93663	-7.01695	-6.31868	1.52668
SRX2388541	Biotin	ES cells	4728	171/60211	146/93663	-7.0121	-6.31415	1.82195
SRX026254	Smad3	ES cells	1395	78/60211	46/93663	-7.0112	-6.31357	2.63772
SRX2440055	Grhl2	EpiSC	750	48/60211	19/93663	-7.00204	-6.30473	3.92989
SRX9450258	Nelfe	ES cells	12111	345/60211	358/93663	-6.99281	-6.29582	1.49909
SRX1602651	Kmt2b	ES cells	16769	538/60211	610/93663	-6.98897	-6.2923	1.37197
SRX16101717	Smarca4	ES cells	10480	457/60211	503/93663	-6.98415	-6.2878	1.41332
SRX2754635	Prdm15	ES cells	4256	112/60211	80/93663	-6.98261	-6.28658	2.17781
SRX6032072	Sox2	ES cells	35219	1200/60211	1521/93663	-6.97249	-6.27678	1.22728
SRX12124920	Lmnb1	Germline stem cell-like cells	480	40/60211	13/93663	-6.96643	-6.27199	4.7864
SRX3584655	Epitope tags	ES cells	951	40/60211	13/93663	-6.96643	-6.27199	4.7864
SRX4159307	Epitope tags	ES cells	394	40/60211	13/93663	-6.96643	-6.27199	4.7864
SRX9088765	Pbx1	Embryoid Bodies	664	40/60211	13/93663	-6.96643	-6.27199	4.7864
SRX1688327	Gtf3c1	ES cells	17565	568/60211	651/93663	-6.96387	-6.26975	1.35725
SRX9567812	Rad21	ES cells	3208	182/60211	159/93663	-6.95855	-6.26474	1.7806
SRX10445769	Epitope tags	ES cells	298	31/60211	7/93663	-6.95217	-6.25931	6.889
SRX4159302	Epitope tags	ES cells	277	31/60211	7/93663	-6.95217	-6.25931	6.889
SRX5463261	Suz12	ES cells	290	31/60211	7/93663	-6.95217	-6.25931	6.889
SRX11237502	Smc3	ES cells	1101	66/60211	35/93663	-6.94722	-6.25468	2.93338
SRX122623	Taf1	ES cells	512	33/60211	8/93663	-6.94074	-6.24914	6.41677
SRX3176046	Ezh2	ES cells	363	33/60211	8/93663	-6.94074	-6.24914	6.41677
SRX8297728	Epitope tags	mESC derived cardiac cells	391	33/60211	8/93663	-6.94074	-6.24914	6.41677
SRX1165111	Epitope tags	ES cells	3074	128/60211	98/93663	-6.93858	-6.2473	2.03178
SRX3602897	Ctcf	iPS cells	11129	524/60211	593/93663	-6.93732	-6.24635	1.37458
SRX10560004	Med12	ES cells	8898	295/60211	296/93663	-6.93267	-6.24202	1.55032
SRX12124757	Lmnb1	ES cells	437	37/60211	11/93663	-6.92064	-6.23125	5.2324
SRX3584656	Epitope tags	ES cells	651	37/60211	11/93663	-6.92064	-6.23125	5.2324
SRX9172005	Rest	ES cells	575	37/60211	11/93663	-6.92064	-6.23125	5.2324
SRX9784430	Epitope tags	ES cells	453	37/60211	11/93663	-6.92064	-6.23125	5.2324
SRX9195315	Tbp	ES cells	12722	440/60211	482/93663	-6.91796	-6.22888	1.42003
SRX2737367	Mtf2	ES cells	665	34/60211	9/93663	-6.9113	-6.22596	5.87663
SRX3586946	Cbx5	ES cells	624	34/60211	9/93663	-6.9113	-6.22596	5.87663
SRX4159313	Epitope tags	ES cells	359	34/60211	9/93663	-6.9113	-6.22596	5.87663
SRX4394178	Psip1	ES cells	485	34/60211	9/93663	-6.9113	-6.22596	5.87663
SRX5938349	Cxxc5	ES cells	325	34/60211	9/93663	-6.9113	-6.22596	5.87663
SRX7845392	Brd4	ES cells	457	34/60211	9/93663	-6.9113	-6.22596	5.87663
SRX7845394	Brd4	ES cells	450	34/60211	9/93663	-6.9113	-6.22596	5.87663
SRX7845399	Brd4	ES cells	448	34/60211	9/93663	-6.9113	-6.22596	5.87663
SRX8297736	Epitope tags	mESC derived cardiac cells	371	34/60211	9/93663	-6.9113	-6.22596	5.87663
SRX8332843	Ctcf	mESC derived haematopoietic progenitor	316	34/60211	9/93663	-6.9113	-6.22596	5.87663
SRX8873453	Banp	ES cells	447	34/60211	9/93663	-6.9113	-6.22596	5.87663
SRX9426625	Stat1	ES cells	497	34/60211	9/93663	-6.9113	-6.22596	5.87663
SRX5817879	Zic2	ES cells	3326	155/60211	128/93663	-6.9018	-6.21677	1.88371
SRX1602654	Kmt2b	ES cells	5418	161/60211	135/93663	-6.90136	-6.21664	1.85517
SRX14663240	GFP	ES cells	16378	567/60211	651/93663	-6.89666	-6.21225	1.35486
SRX17045819	Epitope tags	ES cells	10566	391/60211	419/93663	-6.89582	-6.21172	1.45163
SRX10280213	Smarca4	Embryoid Bodies	520	36/60211	10/93663	-6.89192	-6.21029	5.60009
SRX1036415	Smarcc1	ES cells	509	36/60211	10/93663	-6.89192	-6.21029	5.60009
SRX10445771	Epitope tags	ES cells	348	36/60211	10/93663	-6.89192	-6.21029	5.60009
SRX1100368	Jarid2	ES cells	539	36/60211	10/93663	-6.89192	-6.21029	5.60009
SRX11717332	Nelfa	ES cells	473	36/60211	10/93663	-6.89192	-6.21029	5.60009
SRX3200439	Cdk9	mESC derived haemogenic endothelium	713	36/60211	10/93663	-6.89192	-6.21029	5.60009
SRX8582151	Ctcf	ES cells	753	36/60211	10/93663	-6.89192	-6.21029	5.60009
SRX9426613	Stat1	ES cells	558	36/60211	10/93663	-6.89192	-6.21029	5.60009
SRX11221911	Taf1	ES cells	7977	288/60211	288/93663	-6.88923	-6.20791	1.55558
SRX8687399	Ctcf	ES cells	7474	411/60211	445/93663	-6.88858	-6.20757	1.43673
SRX2388074	Lhx3	mESCs, differentiated	990	45/60211	17/93663	-6.88544	-6.20504	4.11771
SRX4159330	Epitope tags	F9	493	45/60211	17/93663	-6.88544	-6.20504	4.11771
SRX14059479	Arid2	ES cells	3900	110/60211	79/93663	-6.88344	-6.20335	2.166
SRX11221931	Med4	ES cells	4382	158/60211	132/93663	-6.8793	-6.19952	1.86198
SRX5173619	Epitope tags	PGCLC	995	54/60211	24/93663	-6.86644	-6.18696	3.50005
SRX3753618	Nipbl	ES cells	31269	1059/60211	1326/93663	-6.86385	-6.18468	1.24235
SRX499143	Otx2	ES cells	40201	1134/60211	1431/93663	-6.85965	-6.18079	1.23272
SRX2402720	Rad21	ES cells	4461	249/60211	240/93663	-6.85869	-6.18013	1.61391
SRX9567792	Rad21	ES cells	6086	342/60211	356/93663	-6.85181	-6.17356	1.49441
SRX9450261	Nelfe	ES cells	18697	571/60211	657/93663	-6.84753	-6.16959	1.35196
SRX9195281	Epitope tags	ES cells	11125	374/60211	398/93663	-6.84522	-6.16758	1.46178
SRX2037660	Aff3	ES cells	5365	127/60211	97/93663	-6.84433	-6.16699	2.03669
SRX5388087	Epitope tags	ES cells	1245	89/60211	57/93663	-6.84128	-6.16425	2.42889
SRX9195311	Med1	ES cells	16297	578/60211	666/93663	-6.83955	-6.16282	1.35004
SRX7670005	Gtf2b	ES cells	6188	195/60211	175/93663	-6.83676	-6.16034	1.73336
SRX142126	Kat8	ES cells	6989	198/60211	179/93663	-6.83529	-6.15917	1.7207
SRX2440060	Smc1a	EpiSC	4920	254/60211	246/93663	-6.83193	-6.15612	1.60617
SRX234787	Cbx3	iPS cells	11764	436/60211	478/93663	-6.81168	-6.13617	1.4189
SRX4096932	Ctcf	ES cells	3660	202/60211	184/93663	-6.81118	-6.13598	1.70776
SRX5358277	Smc1a	mESCs, differentiated	1757	101/60211	70/93663	-6.79183	-6.11721	2.24448
SRX381487	Rnf2	ES cells	8930	283/60211	283/93663	-6.79181	-6.11721	1.55558
SRX16844914	GFP	ES cells	11954	422/60211	460/93663	-6.78856	-6.11426	1.42708
SRX5436005	Suz12	ES cells	412	28/60211	5/93663	-6.78806	-6.11407	8.71125
SRX8736760	Kmt2d	Embryoid Bodies	16397	572/60211	659/93663	-6.76633	-6.09264	1.35021
SRX3176047	Suz12	ES cells	328	29/60211	6/93663	-6.76523	-6.09221	7.51863
SRX5463257	Suz12	ES cells	277	29/60211	6/93663	-6.76523	-6.09221	7.51863
SRX11123499	Sox2	ES cells	3521	173/60211	150/93663	-6.76499	-6.09221	1.7941
SRX17024522	Smc1a	ES cells	13994	621/60211	725/93663	-6.76049	-6.08801	1.33243
SRX9450256	Nelfe	ES cells	23272	765/60211	921/93663	-6.75983	-6.08765	1.29209
SRX16736245	Kmt2d	ES cells	13734	537/60211	613/93663	-6.75856	-6.08668	1.36272
SRX5371690	Sp1	ES cells	12003	532/60211	606/93663	-6.7535	-6.08192	1.36562
SRX2831996	Kdm1a	ES cells	35224	1221/60211	1557/93663	-6.75046	-6.07918	1.21989
SRX11237521	Yy1	ES cells	24396	794/60211	961/93663	-6.7496	-6.07862	1.28526
SRX14134857	Supt5	ES cells	7180	187/60211	166/93663	-6.74757	-6.07689	1.75237
SRX10641334	Ctcf	ES cells	1756	107/60211	76/93663	-6.74529	-6.07491	2.19009
SRX1053802	Kat5	ES cells	6861	245/60211	236/93663	-6.74229	-6.07221	1.6149
SRX18040248	Sox2	ES cells	33217	1344/60211	1731/93663	-6.72524	-6.05546	1.2078
SRX4551459	Rest	ES cells	740	51/60211	22/93663	-6.71977	-6.05029	3.60612
SRX12622647	Med14	ES cells	9722	353/60211	372/93663	-6.70762	-6.03844	1.47613
SRX2545595	Tet3	ES cells	13793	524/60211	596/93663	-6.70701	-6.03813	1.36766
SRX9467492	Epitope tags	EpiSC	7723	223/60211	210/93663	-6.70467	-6.03609	1.65188
SRX4178805	Dendra2	ES cells	28457	1178/60211	1497/93663	-6.70007	-6.03179	1.2241
SRX373781	Jarid2	ES cells	374	39/60211	13/93663	-6.69936	-6.03138	4.66674
SRX1639483	Epop	ES cells	4880	174/60211	152/93663	-6.69758	-6.0299	1.78073
SRX1177003	Brd4	ES cells	4509	120/60211	91/93663	-6.69634	-6.02895	2.05131
SRX12276175	Ctcf	ES cells	4460	220/60211	206/93663	-6.69346	-6.02637	1.6613
SRX433130	Sox2	ES cells	13474	353/60211	373/93663	-6.69208	-6.02529	1.47217
SRX13228166	Ctcf	ES cells	9093	443/60211	490/93663	-6.6798	-6.01331	1.40637
SRX5371688	Sp1	ES cells	12558	532/60211	607/93663	-6.67703	-6.01084	1.36337
SRX529399	Sox3	mESC derived neural cells	933	46/60211	18/93663	-6.67635	-6.01045	3.97537
SRX6032060	Sox2	ES cells	35998	1244/60211	1591/93663	-6.67558	-6.00998	1.2163
SRX16844894	GFP	ES cells	15900	739/60211	888/93663	-6.67459	-6.00928	1.29456
SRX470060	Epitope tags	ES cells	22556	768/60211	928/93663	-6.66165	-5.99685	1.28738
SRX11127141	Rest	mESC derived cardiac cells	340	32/60211	8/93663	-6.66008	-5.99685	6.22232
SRX206421	Rybp	ES cells	839	32/60211	8/93663	-6.66008	-5.99685	6.22232
SRX2737374	Suz12	ES cells	497	32/60211	8/93663	-6.66008	-5.99685	6.22232
SRX2737379	Suz12	ES cells	456	32/60211	8/93663	-6.66008	-5.99685	6.22232
SRX3176041	Suz12	ES cells	284	32/60211	8/93663	-6.66008	-5.99685	6.22232
SRX8297726	Epitope tags	mESC derived cardiac cells	356	32/60211	8/93663	-6.66008	-5.99685	6.22232
SRX1036416	Smarcc1	ES cells	455	38/60211	12/93663	-6.65368	-5.99146	4.926
SRX12124758	Lmnb1	ES cells	448	38/60211	12/93663	-6.65368	-5.99146	4.926
SRX14059507	Pbrm1	ES cells	684	38/60211	12/93663	-6.65368	-5.99146	4.926
SRX16844915	GFP	ES cells	10175	341/60211	358/93663	-6.65351	-5.99146	1.48171
SRX17045820	Epitope tags	ES cells	11124	415/60211	453/93663	-6.64078	-5.97913	1.42509
SRX1556185	Epitope tags	ES cells	596	36/60211	11/93663	-6.6403	-5.97913	5.09099
SRX5247620	Epitope tags	ES cells	574	36/60211	11/93663	-6.6403	-5.97913	5.09099
SRX1688262	Smc3	ES cells	8737	395/60211	427/93663	-6.63863	-5.97775	1.439
SRX2755307	Ctcf	ES cells	5052	276/60211	276/93663	-6.63793	-5.97735	1.55558
ERX631803	Brd4	ES cells	627	30/60211	7/93663	-6.63624	-5.97654	6.66677
SRX147764	Rnf2	ES cells	661	30/60211	7/93663	-6.63624	-5.97654	6.66677
SRX9101878	Ctnnb1	ES cells	672	30/60211	7/93663	-6.63624	-5.97654	6.66677
SRX750939	Sox2	ES cells	2344	70/60211	40/93663	-6.63307	-5.97429	2.72226
SRX11033189	Nr3c1	mESC derived neural cells	345	35/60211	10/93663	-6.63108	-5.97429	5.44453
SRX15888977	Epitope tags	ES cells	581	35/60211	10/93663	-6.63108	-5.97429	5.44453
SRX15888986	Epitope tags	ES cells	576	35/60211	10/93663	-6.63108	-5.97429	5.44453
SRX1662107	Elob	ES cells	531	35/60211	10/93663	-6.63108	-5.97429	5.44453
SRX2401993	Smad1	ES cells	646	35/60211	10/93663	-6.63108	-5.97429	5.44453
SRX2737381	Suz12	ES cells	519	35/60211	10/93663	-6.63108	-5.97429	5.44453
SRX373782	Jarid2	ES cells	341	35/60211	10/93663	-6.63108	-5.97429	5.44453
SRX6853315	Suz12	ES cells	303	35/60211	10/93663	-6.63108	-5.97429	5.44453
SRX8873454	Banp	ES cells	511	35/60211	10/93663	-6.63108	-5.97429	5.44453
SRX17024520	Smc1a	ES cells	10916	490/60211	552/93663	-6.63052	-5.97403	1.38086
SRX9641216	Sox2	EpiLC	1964	100/60211	70/93663	-6.62891	-5.97271	2.22226
SRX2831999	Kmt2d	ES cells	19188	626/60211	735/93663	-6.62469	-5.96878	1.32489
SRX8713909	Myc	ES cells	6453	211/60211	196/93663	-6.61636	-5.96092	1.67463
SRX4397573	Pou5f1	iPS cells	21133	480/60211	539/93663	-6.61499	-5.96092	1.3853
SRX15943637	Top1	ES cells	411	33/60211	9/93663	-6.61481	-5.96092	5.70379
SRX2026248	Usp7	ES cells	579	33/60211	9/93663	-6.61481	-5.96092	5.70379
SRX4159300	Epitope tags	F9	304	33/60211	9/93663	-6.61481	-5.96092	5.70379
SRX5252260	Ctcf	ES cells	362	33/60211	9/93663	-6.61481	-5.96092	5.70379
SRX8873450	Banp	ES cells	486	33/60211	9/93663	-6.61481	-5.96092	5.70379
SRX12735094	Med1	ES cells	19221	659/60211	780/93663	-6.6122	-5.9586	1.31427
SRX5435983	Stag2	ES cells	2341	148/60211	122/93663	-6.60761	-5.9543	1.8871
SRX218273	Biotin	ES cells	7994	294/60211	299/93663	-6.60523	-5.95221	1.52957
SRX7786279	Smc1a	ES cells	4175	241/60211	233/93663	-6.60467	-5.95194	1.60899
SRX2734243	Ascl1	ES cells	1387	55/60211	26/93663	-6.60131	-5.94887	3.29065
SRX213793	Kdm4c	ES cells	46801	1160/60211	1475/93663	-6.60083	-5.94867	1.22337
SRX470062	Epitope tags	ES cells	4861	253/60211	248/93663	-6.59399	-5.94212	1.58694
SRX7988741	Epitope tags	ES cells	5227	157/60211	133/93663	-6.59347	-5.94189	1.83629
SRX054580	Dpy30	ES cells	14740	330/60211	345/93663	-6.58602	-5.93473	1.48795
SRX9641221	Tcf4	EpiLC	2166	79/60211	49/93663	-6.57573	-5.92472	2.50798
SRX499127	Pou5f1	EpiLC	28313	966/60211	1203/93663	-6.57263	-5.92191	1.24912
SRX209329	Sox2	mESCs, differentiated	3680	154/60211	130/93663	-6.56721	-5.91678	1.84276
SRX1706944	Lhx3	mESCs, differentiated	808	43/60211	16/93663	-6.56593	-5.91578	4.18062
SRX368312	Kansl3	mESC derived neural cells	6397	238/60211	230/93663	-6.56434	-5.91448	1.60969
SRX2612044	Smarca4	ES cells	1470	75/60211	45/93663	-6.56023	-5.91066	2.59263
SRX17024521	Smc1a	ES cells	15340	684/60211	815/93663	-6.55744	-5.90815	1.30554
SRX7669999	Tbp	ES cells	1226	73/60211	43/93663	-6.55527	-5.90627	2.64087
SRX1517382	Epop	ES cells	1989	71/60211	41/93663	-6.55244	-5.904	2.69381
DRX013335	Sin3a	EpiSC	21325	191/60211	173/93663	-6.55243	-5.904	1.71743
SRX13999590	Nelfe	ES cells	14294	404/60211	441/93663	-6.54881	-5.90066	1.42507
SRX378972	Sp1	mESCs, differentiated	14825	513/60211	584/93663	-6.54307	-5.89521	1.36646
SRX9213052	Hmga2	ES cells	14891	310/60211	320/93663	-6.53389	-5.88631	1.50697
SRX9195289	Epitope tags	ES cells	12018	426/60211	470/93663	-6.52582	-5.87853	1.40995
SRX2734245	Epitope tags	ES cells	624	41/60211	15/93663	-6.52545	-5.87844	4.25192
SRX9596422	Trim28	ES cells	23724	549/60211	633/93663	-6.52329	-5.87657	1.34915
SRX3270945	Smarca4	ES cells	2337	112/60211	83/93663	-6.52096	-5.87452	2.0991
SRX5247635	Epitope tags	ES cells	1187	46/60211	19/93663	-6.51857	-5.87242	3.76614
SRX9326770	Smc3	ES cells	4742	256/60211	252/93663	-6.51764	-5.87177	1.58027
SRX9101840	Kdm2b	ES cells	13918	396/60211	431/93663	-6.5129	-5.86731	1.42926
SRX5817865	Zfp281	ES cells	11502	470/60211	528/93663	-6.51012	-5.86482	1.3847
SRX5023744	Sox2	ES cells	20516	656/60211	778/93663	-6.5063	-5.86128	1.31165
ERX1493877	Epitope tags	ES cells	826	50/60211	22/93663	-6.50296	-5.85822	3.53541
SRX14134863	Supt5	ES cells	9399	294/60211	300/93663	-6.50031	-5.85586	1.52447
SRX4403317	Sin3a	ES cells	41413	1776/60211	2356/93663	-6.48715	-5.84298	1.17263
SRX5401526	Smc1a	ES cells	7766	403/60211	440/93663	-6.48676	-5.84287	1.42477
SRX2545593	Tet3	ES cells	7785	303/60211	312/93663	-6.48157	-5.83819	1.51071
SRX668246	Cdk7	ES cells	3682	129/60211	102/93663	-6.48151	-5.83819	1.96735
SRX12124823	Lmnb1	PGCLC	413	40/60211	14/93663	-6.47283	-5.83063	4.44451
SRX373779	Jarid2	ES cells	388	40/60211	14/93663	-6.47283	-5.83063	4.44451
SRX5027406	Wdr5	ES cells	878	40/60211	14/93663	-6.47283	-5.83063	4.44451
SRX581834	Epitope tags	ES cells	469	40/60211	14/93663	-6.47283	-5.83063	4.44451
SRX8736786	Kmt2d	mESC derived neural cells	12903	409/60211	448/93663	-6.47159	-5.82967	1.42016
SRX9450263	Chd4	ES cells	5590	215/60211	202/93663	-6.47065	-5.82901	1.65569
SRX6071873	Rnf2	ES cells	22201	910/60211	1128/93663	-6.46781	-5.82646	1.25494
SRX1590979	Tet2	ES cells	2186	121/60211	93/93663	-6.46448	-5.82341	2.02393
SRX4017941	Nanog	ES cells	4034	173/60211	152/93663	-6.46305	-5.82226	1.7705
SRX209326	Sox2	mESCs, differentiated	2752	115/60211	87/93663	-6.46135	-5.82084	2.05623
SRX499117	Otx2	ES cells	25986	1082/60211	1368/93663	-6.45844	-5.81821	1.23036
SRX11417005	GFP	ES cells	12038	479/60211	541/93663	-6.45489	-5.81494	1.37731
SRX5463254	Suz12	ES cells	207	28/60211	6/93663	-6.45391	-5.81452	7.25937
SRX5463265	Suz12	ES cells	230	28/60211	6/93663	-6.45391	-5.81452	7.25937
SRX5938347	Cxxc5	ES cells	1679	83/60211	53/93663	-6.4518	-5.81268	2.4361
SRX1602655	Kmt2b	ES cells	14713	463/60211	520/93663	-6.44559	-5.80679	1.38506
SRX2916334	Rad21	mESC derived neural cells	5212	283/60211	287/93663	-6.44535	-5.80679	1.5339
SRX319557	Nanog	ES cells	3455	105/60211	76/93663	-6.44398	-5.8057	2.14916
DRX046376	Prdm14	EpiLC	6155	227/60211	217/93663	-6.44285	-5.80513	1.62727
SRX5358280	Smc1a	mESCs, differentiated	3963	227/60211	217/93663	-6.44285	-5.80513	1.62727
SRX9411718	Kdm1a	EpiLC	35607	809/60211	989/93663	-6.43373	-5.79629	1.27246
SRX1049911	Epitope tags	ES cells	767	38/60211	13/93663	-6.43109	-5.79448	4.54708
SRX373774	Jarid2	ES cells	515	38/60211	13/93663	-6.43109	-5.79448	4.54708
SRX5023746	Sox2	ES cells	476	38/60211	13/93663	-6.43109	-5.79448	4.54708
SRX12735095	Med1	ES cells	15378	449/60211	501/93663	-6.42187	-5.78554	1.39412
SRX10280214	Smarca4	Embryoid Bodies	503	37/60211	12/93663	-6.40314	-5.76792	4.79637
SRX14059501	Pbrm1	ES cells	691	37/60211	12/93663	-6.40314	-5.76792	4.79637
SRX2744954	Cbx3	ES cells	760	37/60211	12/93663	-6.40314	-5.76792	4.79637
SRX4338250	Suz12	ES cells	657	37/60211	12/93663	-6.40314	-5.76792	4.79637
SRX17045822	Nelfe	ES cells	7956	285/60211	290/93663	-6.39565	-5.7607	1.52876
SRX6073530	Nipbl	P19	17075	398/60211	435/93663	-6.39185	-5.75718	1.42327
SRX1092371	Daxx	ES cells	685	43/60211	17/93663	-6.38686	-5.75247	3.9347
SRX027354	Ep300	ES cells	16065	592/60211	693/93663	-6.3761	-5.74317	1.32886
SRX1639491	Elob	ES cells	492	31/60211	8/93663	-6.37563	-5.74317	6.02787
SRX19176737	Cbx4	ES cells	380	31/60211	8/93663	-6.37563	-5.74317	6.02787
SRX2002353	Epitope tags	ES cells	455	31/60211	8/93663	-6.37563	-5.74317	6.02787
SRX2353879	Phc1	ES cells	459	31/60211	8/93663	-6.37563	-5.74317	6.02787
SRX4386215	Epitope tags	ES cells	436	31/60211	8/93663	-6.37563	-5.74317	6.02787
SRX5785867	Leo1	ES cells	340	31/60211	8/93663	-6.37563	-5.74317	6.02787
SRX7669996	Tbp	ES cells	1375	72/60211	43/93663	-6.36683	-5.73603	2.60469
SRX10445767	Epitope tags	ES cells	283	34/60211	10/93663	-6.36602	-5.73603	5.28897
SRX14059494	Pbrm1	ES cells	604	34/60211	10/93663	-6.36602	-5.73603	5.28897
SRX2388071	Lhx3	mESCs, differentiated	673	34/60211	10/93663	-6.36602	-5.73603	5.28897
SRX3586944	Cbx5	ES cells	558	34/60211	10/93663	-6.36602	-5.73603	5.28897
SRX5578667	Biotin	ES cells	537	34/60211	10/93663	-6.36602	-5.73603	5.28897
SRX5850005	Epitope tags	ES cells	513	34/60211	10/93663	-6.36602	-5.73603	5.28897
SRX9101879	Ctnnb1	ES cells	740	34/60211	10/93663	-6.36602	-5.73603	5.28897
SRX9172011	Pou5f1	ES cells	586	34/60211	10/93663	-6.36602	-5.73603	5.28897
SRX10280219	Smarca4	Embryoid Bodies	441	35/60211	11/93663	-6.35934	-5.73126	4.94957
SRX14311044	Epitope tags	ES cells	415	35/60211	11/93663	-6.35934	-5.73126	4.94957
SRX4980256	Hoxb1	ES cells	574	35/60211	11/93663	-6.35934	-5.73126	4.94957
SRX8844239	Arnt	EpiSC	372	35/60211	11/93663	-6.35934	-5.73126	4.94957
SRX9172013	Pou5f1	ES cells	604	35/60211	11/93663	-6.35934	-5.73126	4.94957
SRX9426636	Stat2	ES cells	545	35/60211	11/93663	-6.35934	-5.73126	4.94957
SRX9426654	Stat2	ES cells	537	35/60211	11/93663	-6.35934	-5.73126	4.94957
SRX2752335	Kmt2c	ES cells	40637	1374/60211	1785/93663	-6.35309	-5.72528	1.1974
SRX5394949	Myc	ES cells	5193	196/60211	181/93663	-6.34139	-5.71385	1.68449
SRX7856887	Ctcf	ES cells	3591	193/60211	177/93663	-6.33518	-5.70791	1.6962
SRX5463218	Suz12	ES cells	314	29/60211	7/93663	-6.32162	-5.69462	6.44454
SRX11221900	Med4	ES cells	440	32/60211	9/93663	-6.31854	-5.69371	5.53095
SRX15492534	Msh6	ES cells	424	32/60211	9/93663	-6.31854	-5.69371	5.53095
SRX16057319	Mtf2	ES cells	292	32/60211	9/93663	-6.31854	-5.69371	5.53095
SRX19176735	Cbx4	ES cells	358	32/60211	9/93663	-6.31854	-5.69371	5.53095
SRX2737370	Mtf2	ES cells	409	32/60211	9/93663	-6.31854	-5.69371	5.53095
SRX4988103	Etv5	ES cells	610	32/60211	9/93663	-6.31854	-5.69371	5.53095
SRX8873452	Banp	ES cells	431	32/60211	9/93663	-6.31854	-5.69371	5.53095
SRX9426623	Stat1	ES cells	486	32/60211	9/93663	-6.31854	-5.69371	5.53095
SRX9431025	Rcor2	ES cells	4084	77/60211	48/93663	-6.31526	-5.6907	2.49541
SRX14134854	Epitope tags	ES cells	8697	255/60211	253/93663	-6.30727	-5.68298	1.56788
SRX1404237	Cbfa2t2	ES cells	4402	190/60211	174/93663	-6.30353	-5.67951	1.69862
SRX8332830	Ctcf	mESC derived haematopoietic progenitor	1384	101/60211	73/93663	-6.29871	-5.67496	2.15224
SRX2270102	Ep300	ES cells	44572	1569/60211	2065/93663	-6.29758	-5.6741	1.18194
SRX1602644	Men1	ES cells	11108	363/60211	391/93663	-6.2962	-5.67299	1.44418
SRX504219	Kdm1a	mESC derived mesodermal cells	4244	183/60211	166/93663	-6.29207	-5.66913	1.71489
SRX1093866	Epitope tags	F9	1280	60/60211	32/93663	-6.28851	-5.66584	2.91671
ERX631825	Tet3	ES cells	602	24/60211	4/93663	-6.28622	-5.66382	9.33348
SRX12197085	Nrf1	mESC derived neural cells	1705	49/60211	22/93663	-6.28368	-5.66155	3.4647
SRX9731390	Epitope tags	ES cells	421	45/60211	19/93663	-6.27531	-5.65344	3.68427
SRX8626563	Rad21	ES cells	5033	308/60211	320/93663	-6.27437	-5.65277	1.49725
SRX466435	Epitope tags	ES cells	6048	260/60211	260/93663	-6.27329	-5.65196	1.55558
SRX994810	Nrf1	ES cells	14117	515/60211	592/93663	-6.27254	-5.65148	1.35325
SRX7691498	Pou5f1	ES cells	1969	96/60211	68/93663	-6.26946	-5.64871	2.19611
SRX1706948	Pou5f1	mESCs, differentiated	8193	299/60211	309/93663	-6.26924	-5.64871	1.50524
SRX14134855	Nelfe	ES cells	13504	464/60211	524/93663	-6.26815	-5.64789	1.37746
SRX2068817	Leo1	ES cells	682	40/60211	15/93663	-6.26691	-5.64745	4.14821
SRX4171351	Epitope tags	ES cells	743	40/60211	15/93663	-6.26691	-5.64745	4.14821
SRX4674464	Trim33	Embryoid Bodies	660	40/60211	15/93663	-6.26691	-5.64745	4.14821
SRX529400	Sox3	mESC derived neural cells	2051	87/60211	58/93663	-6.26599	-5.6468	2.33337
SRX871223	Tgif2	ES cells	5353	213/60211	202/93663	-6.26402	-5.64541	1.64029
SRX11540076	Ctnnb1	EpiLC	4327	167/60211	147/93663	-6.26391	-5.64541	1.76722
SRX6032073	Sox2	ES cells	21190	729/60211	882/93663	-6.2638	-5.64541	1.28573
SRX204802	Epitope tags	ES cells	169	18/60211	1/93663	-6.25783	-5.6397	28.0004
SRX8713912	Klf4	iPS cells	1664	64/60211	36/93663	-6.2529	-5.63504	2.76547
SRX5784019	Brd4	ES cells	8301	127/60211	101/93663	-6.24848	-5.63089	1.95603
SRX373167	GFP	ES cells	30878	1263/60211	1630/93663	-6.24778	-5.63045	1.20534
SRX19838667	Kmt2b	ES cells	14295	391/60211	428/93663	-6.2441	-5.62704	1.4211
SRX2441340	Pou5f1	ES cells	2249	94/60211	66/93663	-6.23672	-5.61992	2.21552
SRX2440081	Smc1a	ES cells	3190	181/60211	164/93663	-6.23563	-5.6191	1.71683
SRX11123497	Sox2	ES cells	5932	261/60211	262/93663	-6.23481	-5.61854	1.54964
SRX029864	Sin3a	ES cells	2799	85/60211	56/93663	-6.23173	-5.61573	2.36115
SRX7670004	Gtf2b	ES cells	7066	218/60211	208/93663	-6.23056	-5.61513	1.63037
SRX213820	Nanog	ES cells	811	39/60211	14/93663	-6.23007	-5.61513	4.3334
SRX590295	Epitope tags	ES cells	756	39/60211	14/93663	-6.23007	-5.61513	4.3334
SRX9784438	Epitope tags	ES cells	785	39/60211	14/93663	-6.23007	-5.61513	4.3334
SRX1590998	Tet2	ES cells	1766	97/60211	69/93663	-6.22339	-5.60871	2.18683
SRX390111	GFP	ES cells	170785	2811/60211	4905/93663	-6.22248	-5.60806	0.891485
SRX14134864	Supt5	ES cells	9071	275/60211	279/93663	-6.21826	-5.60411	1.53328
SRX9731389	Epitope tags	ES cells	770	57/60211	29/93663	-6.21356	-5.59967	3.05752
SRX16989255	Nanog	ES cells	4862	185/60211	169/93663	-6.21282	-5.5992	1.70285
SRX5463217	Suz12	ES cells	317	26/60211	5/93663	-6.21182	-5.59846	8.08901
SRX208062	Rara	ES cells	7961	127/60211	102/93663	-6.20512	-5.59202	1.93685
SRX2831973	Kmt2d	ES cells	14532	481/60211	547/93663	-6.1951	-5.58226	1.36789
SRX2793940	Cdk8	ES cells	3171	122/60211	96/93663	-6.19069	-5.57812	1.97688
SRX9695051	Ctcf	iPS cells	9469	493/60211	563/93663	-6.18865	-5.57634	1.36217
SRX19028406	Taf1	ES cells	16206	676/60211	811/93663	-6.17947	-5.56742	1.29664
SRX4594901	Smarca4	ES cells	7227	255/60211	255/93663	-6.17568	-5.5639	1.55558
SRX12124821	Lmnb1	PGCLC	458	37/60211	13/93663	-6.16236	-5.55188	4.42742
SRX1662106	Elob	ES cells	662	37/60211	13/93663	-6.16236	-5.55188	4.42742
SRX7988744	Epitope tags	ES cells	1558	37/60211	13/93663	-6.16236	-5.55188	4.42742
SRX9426664	Stat2	ES cells	597	37/60211	13/93663	-6.16236	-5.55188	4.42742
SRX9784439	Epitope tags	ES cells	470	37/60211	13/93663	-6.16236	-5.55188	4.42742
SRX4301428	Smarca4	mESC derived cardiac cells	4921	134/60211	110/93663	-6.15636	-5.54615	1.89498
SRX14059495	Pbrm1	ES cells	659	36/60211	12/93663	-6.14906	-5.54015	4.66674
SRX2514286	Epitope tags	ES cells	847	36/60211	12/93663	-6.14906	-5.54015	4.66674
SRX262849	Rbpj	F9	691	36/60211	12/93663	-6.14906	-5.54015	4.66674
SRX652178	Pwp1	ES cells	643	36/60211	12/93663	-6.14906	-5.54015	4.66674
SRX9172015	Pou5f1	ES cells	613	36/60211	12/93663	-6.14906	-5.54015	4.66674
SRX4178813	Dendra2	ES cells	28276	1032/60211	1306/93663	-6.14642	-5.53777	1.22922
SRX1410236	Sox2	ES cells	3804	176/60211	159/93663	-6.14581	-5.53742	1.7219
SRX5027383	Pcgf2	ES cells	453	27/60211	6/93663	-6.14148	-5.53361	7.00011
SRX5463234	Mtf2	ES cells	296	27/60211	6/93663	-6.14148	-5.53361	7.00011
SRX7175340	Yy1	ES cells	14235	342/60211	366/93663	-6.13519	-5.52758	1.45357
SRX470065	Epitope tags	ES cells	2063	126/60211	101/93663	-6.11585	-5.50858	1.94062
SRX8626570	Rad21	ES cells	7221	388/60211	426/93663	-6.11567	-5.50858	1.41682
SRX470058	Epitope tags	ES cells	41346	1215/60211	1566/93663	-6.11445	-5.50762	1.20692
SRX16844912	GFP	ES cells	19306	776/60211	950/93663	-6.10874	-5.50217	1.27066
SRX3270968	Smarca4	ES cells	3364	138/60211	115/93663	-6.09819	-5.49414	1.8667
SRX10641422	Ctcf	ES cells	546	33/60211	10/93663	-6.09761	-5.49414	5.13341
SRX2426792	Jarid2	ES cells	509	33/60211	10/93663	-6.09761	-5.49414	5.13341
SRX2744948	Cbx1	ES cells	659	33/60211	10/93663	-6.09761	-5.49414	5.13341
SRX2776971	Mtf2	ES cells	611	33/60211	10/93663	-6.09761	-5.49414	5.13341
SRX3586942	Cbx5	ES cells	519	33/60211	10/93663	-6.09761	-5.49414	5.13341
SRX4394180	Hdgf2	ES cells	635	33/60211	10/93663	-6.09761	-5.49414	5.13341
SRX5247623	Zbtb11	ES cells	534	33/60211	10/93663	-6.09761	-5.49414	5.13341
SRX800823	Smarca4	mESCs, differentiated	454	33/60211	10/93663	-6.09761	-5.49414	5.13341
SRX8297729	Epitope tags	mESC derived cardiac cells	418	33/60211	10/93663	-6.09761	-5.49414	5.13341
SRX8297734	Epitope tags	mESC derived cardiac cells	360	33/60211	10/93663	-6.09761	-5.49414	5.13341
SRX9426649	Stat2	ES cells	530	33/60211	10/93663	-6.09761	-5.49414	5.13341
SRX5088233	Pml	ES cells	18216	284/60211	292/93663	-6.09652	-5.4933	1.51296
SRX352997	Epitope tags	mESC derived neural cells	637	41/60211	16/93663	-6.09582	-5.49312	3.98617
SRX373780	Jarid2	ES cells	442	41/60211	16/93663	-6.09582	-5.49312	3.98617
SRX1117839	Suz12	ES cells	426	30/60211	8/93663	-6.08844	-5.48651	5.83342
SRX327702	Dnmt3l	ES cells	665	30/60211	8/93663	-6.08844	-5.48651	5.83342
SRX8818292	Epitope tags	EpiLC	542	30/60211	8/93663	-6.08844	-5.48651	5.83342
SRX590274	Ep300	mESCs, differentiated	2601	59/60211	32/93663	-6.08168	-5.48	2.8681
SRX15652597	Nipbl	ES cells	7997	267/60211	271/93663	-6.08121	-5.47979	1.53262
SRX10978091	Banp	ES cells	10240	375/60211	409/93663	-6.08085	-5.47969	1.42626
SRX5023709	Esrrb	ES cells	17496	568/60211	666/93663	-6.07889	-5.47909	1.32668
SRX14311045	Epitope tags	ES cells	416	34/60211	11/93663	-6.07847	-5.47909	4.80815
SRX1688266	Srsf1	ES cells	633	34/60211	11/93663	-6.07847	-5.47909	4.80815
SRX800821	Smarca4	ES cells	454	34/60211	11/93663	-6.07847	-5.47909	4.80815
SRX9101868	Ctnnb1	ES cells	685	34/60211	11/93663	-6.07847	-5.47909	4.80815
SRX9426627	Stat1	ES cells	482	34/60211	11/93663	-6.07847	-5.47909	4.80815
SRX9784433	Epitope tags	ES cells	605	34/60211	11/93663	-6.07847	-5.47909	4.80815
SRX16844887	GFP	ES cells	16621	723/60211	878/93663	-6.06693	-5.46781	1.28096
SRX2831931	Kmt2d	ES cells	6875	192/60211	179/93663	-6.06429	-5.46542	1.66855
SRX2002350	Epitope tags	ES cells	793	48/60211	22/93663	-6.06242	-5.46406	3.39399
SRX2523719	Rnf2	iPS cells	998	48/60211	22/93663	-6.06242	-5.46406	3.39399
SRX085105	Ncaph2	ES cells	1509	77/60211	49/93663	-6.06145	-5.46335	2.44448
SRX4159345	Epitope tags	F9	39770	710/60211	860/93663	-6.0585	-5.46065	1.28426
SRX1670193	Med12	ES cells	6397	243/60211	241/93663	-6.05687	-5.45927	1.56849
SRX14059473	Arid2	ES cells	7009	231/60211	226/93663	-6.05626	-5.45892	1.59
SRX16844913	GFP	ES cells	13598	468/60211	533/93663	-6.04781	-5.45072	1.36587
SRX19951047	Epitope tags	ES cells	2382	91/60211	64/93663	-6.04032	-5.44349	2.21184
SRX13440025	Maz	mESC derived neural cells	4868	155/60211	135/93663	-6.03994	-5.44336	1.78604
SRX7175336	Yy1	ES cells	10911	212/60211	203/93663	-6.03618	-5.43985	1.62455
SRX16844903	GFP	ES cells	19656	847/60211	1050/93663	-6.02836	-5.43229	1.25483
SRX1997143	Ep300	ES cells	2343	94/60211	67/93663	-6.02798	-5.43216	2.18245
SRX4397590	Pou5f1	iPS cells	3671	169/60211	151/93663	-6.0274	-5.43183	1.74101
SRX1437360	Kmt2d	mESC derived cardiac cells	977	31/60211	9/93663	-6.02311	-5.42956	5.35811
SRX2002357	Tet1	ES cells	507	31/60211	9/93663	-6.02311	-5.42956	5.35811
SRX2401996	Smad1	ES cells	553	31/60211	9/93663	-6.02311	-5.42956	5.35811
SRX4159297	Epitope tags	F9	257	31/60211	9/93663	-6.02311	-5.42956	5.35811
SRX4159348	Epitope tags	ES cells	314	31/60211	9/93663	-6.02311	-5.42956	5.35811
SRX7643926	L3mbtl3	ES cells	563	31/60211	9/93663	-6.02311	-5.42956	5.35811
SRX7988740	Epitope tags	ES cells	1070	31/60211	9/93663	-6.02311	-5.42956	5.35811
SRX8818295	Epitope tags	EpiSC	481	31/60211	9/93663	-6.02311	-5.42956	5.35811
SRX6003869	Tbp	ES cells	76475	2504/60211	3431/93663	-6.01325	-5.41995	1.13529
SRX15943643	Top1	ES cells	595	39/60211	15/93663	-6.00816	-5.41541	4.04451
SRX385378	GFP	ES cells	513	39/60211	15/93663	-6.00816	-5.41541	4.04451
SRX027460	E2f4	iPS cells	5250	190/60211	177/93663	-6.00796	-5.41541	1.66983
SRX368296	Mcrs1	ES cells	13998	426/60211	478/93663	-6.00745	-5.41515	1.38635
SRX7176634	GFP	ES cells	16790	288/60211	298/93663	-6.00272	-5.41067	1.50338
SRX2831998	Kmt2d	ES cells	17235	608/60211	722/93663	-5.99216	-5.40036	1.30996
SRX823607	Zic3	ES cells	734	43/60211	18/93663	-5.99022	-5.39874	3.71611
SRX2658702	Biotin	ES cells	1480	60/60211	33/93663	-5.98981	-5.39874	2.82833
SRX085108	Ncaph2	ES cells	1975	92/60211	65/93663	-5.98954	-5.39874	2.20174
SRX8332829	Ctcf	mESC derived haematopoietic progenitor	1096	92/60211	65/93663	-5.98954	-5.39874	2.20174
SRX8687401	Ctcf	ES cells	6928	385/60211	424/93663	-5.98793	-5.39739	1.4125
SRX5023747	Sox2	ES cells	2638	102/60211	76/93663	-5.98694	-5.39664	2.08775
SRX3581848	E2f6	ES cells	5725	191/60211	178/93663	-5.98534	-5.39535	1.66919
SRX12124856	Lmnb1	PGCLC	407	38/60211	14/93663	-5.9844	-5.39535	4.22229
SRX2744961	Cbx3	ES cells	1067	38/60211	14/93663	-5.9844	-5.39535	4.22229
SRX3058257	Naa10	ES cells	921	38/60211	14/93663	-5.9844	-5.39535	4.22229
SRX978374	Epitope tags	ES cells	801	38/60211	14/93663	-5.9844	-5.39535	4.22229
SRX14134856	Nelfe	ES cells	13345	450/60211	510/93663	-5.98363	-5.39483	1.37257
SRX6716555	Ash2l	ES cells	4191	125/60211	101/93663	-5.98266	-5.39436	1.92522
SRX9641188	Sox2	EpiLC	3135	125/60211	101/93663	-5.98266	-5.39436	1.92522
SRX14663260	Smad2	ES cells	15455	434/60211	488/93663	-5.98237	-5.39431	1.38345
SRX6071847	Pcgf1	ES cells	16862	719/60211	874/93663	-5.98018	-5.39237	1.2797
SRX11677009	Tbp	ES cells	37830	1656/60211	2201/93663	-5.97496	-5.3874	1.1704
SRX10641389	Ctcf	ES cells	3191	195/60211	183/93663	-5.97171	-5.3844	1.65758
SRX10445758	Epitope tags	ES cells	2959	122/60211	98/93663	-5.96826	-5.3812	1.93654
SRX5251389	Foxh1	ES cells	47947	1842/60211	2469/93663	-5.96724	-5.38042	1.16054
SRX160828	Ctcf	ES cells	8696	418/60211	468/93663	-5.9648	-5.37823	1.38939
SRX8120164	O-GlcNAc	ES cells	28207	1022/60211	1297/93663	-5.95254	-5.36622	1.22575
SRX11123498	Sox2	ES cells	3889	188/60211	175/93663	-5.95094	-5.36487	1.67114
SRX5817896	Biotin	ES cells	204	23/60211	4/93663	-5.94365	-5.35783	8.94458
SRX2752334	Kmt2c	ES cells	37206	1270/60211	1649/93663	-5.94212	-5.35654	1.19805
SRX997158	Brd4	ES cells	6833	160/60211	142/93663	-5.94069	-5.35536	1.75277
SRX14663244	GFP	ES cells	12040	388/60211	429/93663	-5.93243	-5.34734	1.40691
SRX11677007	Tbp	ES cells	34223	1548/60211	2047/93663	-5.93149	-5.34665	1.17637
SRX11237527	Yy1	ES cells	23266	784/60211	965/93663	-5.92799	-5.3434	1.26381
SRX823606	Mbd3	ES cells	978	54/60211	28/93663	-5.92427	-5.33992	3.00005
SRX213809	Pou5f1	ES cells	8736	338/60211	364/93663	-5.91994	-5.33584	1.44447
SRX6691038	Ctcf	ES cells	3326	171/60211	155/93663	-5.91827	-5.33442	1.71616
SRX16989242	Pou5f1	ES cells	15147	496/60211	572/93663	-5.91559	-5.33209	1.34889
SRX825833	Runx1	mESC derived myeloid progenitors	5305	168/60211	151/93663	-5.91545	-5.33209	1.73071
SRX994811	Nrf1	ES cells	17535	589/60211	698/93663	-5.91494	-5.33207	1.31266
SRX1213687	Dnmt3b	ES cells	254	25/60211	5/93663	-5.9147	-5.33207	7.7779
SRX3176044	Suz12	ES cells	406	25/60211	5/93663	-5.9147	-5.33207	7.7779
SRX047140	Kdm1a	ES cells	2237	88/60211	61/93663	-5.91112	-5.32898	2.24411
SRX7669997	Tbp	ES cells	1761	88/60211	61/93663	-5.91112	-5.32898	2.24411
SRX4159329	Epitope tags	F9	2862	95/60211	69/93663	-5.90818	-5.32629	2.14174
SRX3506041	Eed	ES cells	605	45/60211	20/93663	-5.90644	-5.32479	3.50005
SRX1706952	Lhx3	mESCs, differentiated	609	36/60211	13/93663	-5.89383	-5.31375	4.30776
SRX18040254	Sox2	ES cells	594	36/60211	13/93663	-5.89383	-5.31375	4.30776
SRX2796969	Epitope tags	ES cells	722	36/60211	13/93663	-5.89383	-5.31375	4.30776
SRX8844240	Arnt	EpiSC	409	36/60211	13/93663	-5.89383	-5.31375	4.30776
SRX9426663	Stat2	ES cells	559	36/60211	13/93663	-5.89383	-5.31375	4.30776
SRX023511	Wdr5	ES cells	934	35/60211	12/93663	-5.89223	-5.31375	4.53711
SRX1662105	Elob	ES cells	632	35/60211	12/93663	-5.89223	-5.31375	4.53711
SRX1662108	Elob	ES cells	552	35/60211	12/93663	-5.89223	-5.31375	4.53711
SRX3176039	Suz12	ES cells	471	35/60211	12/93663	-5.89223	-5.31375	4.53711
SRX5358268	Ldb1	mESCs, differentiated	726	35/60211	12/93663	-5.89223	-5.31375	4.53711
SRX7268253	Kdm2b	Embryoid Bodies	299	35/60211	12/93663	-5.89223	-5.31375	4.53711
SRX8873451	Banp	ES cells	527	35/60211	12/93663	-5.89223	-5.31375	4.53711
SRX9172012	Pou5f1	ES cells	596	35/60211	12/93663	-5.89223	-5.31375	4.53711
SRX10445759	Epitope tags	ES cells	1417	76/60211	49/93663	-5.891	-5.31276	2.41274
SRX1342337	Sox2	ES cells	10790	370/60211	406/93663	-5.88701	-5.30902	1.41765
SRX14059483	Pbrm1	ES cells	914	41/60211	17/93663	-5.88606	-5.3088	3.75169
SRX823728	Aff3	ES cells	869	41/60211	17/93663	-5.88606	-5.3088	3.75169
SRX9426653	Stat2	ES cells	737	41/60211	17/93663	-5.88606	-5.3088	3.75169
SRX1089842	Gtf2b	Embryoid Bodies	5880	220/60211	215/93663	-5.88114	-5.30412	1.59176
SRX9641208	Ctnnb1	EpiLC	7233	262/60211	267/93663	-5.87722	-5.30044	1.52645
SRX1602657	Kmt2b	ES cells	11022	279/60211	289/93663	-5.87698	-5.30044	1.50175
SRX13999589	Nelfe	ES cells	5659	130/60211	107/93663	-5.87636	-5.30006	1.88996
SRX11677010	Tbp	ES cells	37320	1632/60211	2169/93663	-5.86822	-5.29217	1.17045
SRX12124759	Lmnb1	ES cells	634	40/60211	16/93663	-5.85699	-5.2819	3.88895
SRX2744936	Adnp	ES cells	722	40/60211	16/93663	-5.85699	-5.2819	3.88895
SRX5388096	Zfp708	ES cells	425	40/60211	16/93663	-5.85699	-5.2819	3.88895
SRX882858	Hdac1	mESCs, differentiated	538	40/60211	16/93663	-5.85699	-5.2819	3.88895
SRX1980012	Crebbp	EpiSC	5560	162/60211	145/93663	-5.85512	-5.28027	1.73796
SRX2755304	Ctcf	ES cells	3275	202/60211	193/93663	-5.84631	-5.2717	1.62812
SRX2744957	Cbx1	ES cells	12561	218/60211	212/93663	-5.84474	-5.27037	1.59961
SRX085107	Ncaph2	ES cells	2144	104/60211	79/93663	-5.84029	-5.26616	2.04785
SRX8713914	Pou5f1	iPS cells	1113	47/60211	22/93663	-5.83972	-5.26583	3.32328
SRX16844916	GFP	ES cells	20298	973/60211	1231/93663	-5.83815	-5.2645	1.22955
SRX7988747	Epitope tags	ES cells	2923	91/60211	65/93663	-5.83238	-5.25978	2.17781
SRX4594904	Smarca4	ES cells	3803	140/60211	119/93663	-5.83078	-5.25978	1.83009
SRX3151946	Lmnb1	ES cells	260	26/60211	6/93663	-5.82884	-5.25978	6.74084
SRX3341231	Asxl1	ES cells	310	26/60211	6/93663	-5.82884	-5.25978	6.74084
SRX5436008	Suz12	ES cells	399	26/60211	6/93663	-5.82884	-5.25978	6.74084
SRX1093865	Epitope tags	F9	245	32/60211	10/93663	-5.82675	-5.25978	4.97785
SRX14059476	Pbrm1	ES cells	561	32/60211	10/93663	-5.82675	-5.25978	4.97785
SRX14059500	Pbrm1	ES cells	585	32/60211	10/93663	-5.82675	-5.25978	4.97785
SRX1613300	Cbx2	ES cells	483	32/60211	10/93663	-5.82675	-5.25978	4.97785
SRX1688205	Baz1a	ES cells	675	32/60211	10/93663	-5.82675	-5.25978	4.97785
SRX1688244	Med1	ES cells	596	32/60211	10/93663	-5.82675	-5.25978	4.97785
SRX1688264	Smarca5	ES cells	765	32/60211	10/93663	-5.82675	-5.25978	4.97785
SRX1688265	Smarca5	ES cells	676	32/60211	10/93663	-5.82675	-5.25978	4.97785
SRX2401994	Smad1	ES cells	615	32/60211	10/93663	-5.82675	-5.25978	4.97785
SRX2523720	Rnf2	iPS cells	372	32/60211	10/93663	-5.82675	-5.25978	4.97785
SRX2737380	Suz12	ES cells	631	32/60211	10/93663	-5.82675	-5.25978	4.97785
SRX3176049	Suz12	ES cells	485	32/60211	10/93663	-5.82675	-5.25978	4.97785
SRX4159320	Epitope tags	ES cells	400	32/60211	10/93663	-5.82675	-5.25978	4.97785
SRX4386222	Epitope tags	mESC derived neural cells	485	32/60211	10/93663	-5.82675	-5.25978	4.97785
SRX4980243	Rest	ES cells	466	32/60211	10/93663	-5.82675	-5.25978	4.97785
SRX5247624	Zbtb11	ES cells	504	32/60211	10/93663	-5.82675	-5.25978	4.97785
SRX5252272	Rad21	ES cells	471	32/60211	10/93663	-5.82675	-5.25978	4.97785
SRX604257	Suv39h2	mESC derived neural cells	530	32/60211	10/93663	-5.82675	-5.25978	4.97785
SRX7268261	Rnf2	Embryoid Bodies	327	32/60211	10/93663	-5.82675	-5.25978	4.97785
SRX7856903	Rad21	ES cells	494	32/60211	10/93663	-5.82675	-5.25978	4.97785
SRX9426629	Stat1	ES cells	495	32/60211	10/93663	-5.82675	-5.25978	4.97785
SRX9426637	Stat2	ES cells	504	32/60211	10/93663	-5.82675	-5.25978	4.97785
SRX978383	Suz12	ES cells	495	32/60211	10/93663	-5.82675	-5.25978	4.97785
SRX4980260	Hoxb1	ES cells	2876	94/60211	68/93663	-5.81821	-5.25147	2.15036
SRX2539819	Hdac1	ES cells	13402	310/60211	329/93663	-5.81173	-5.24523	1.46574
SRX9424476	Ep400	ES cells	7352	301/60211	317/93663	-5.81043	-5.24417	1.47706
SRX13332925	Dnttip1	ES cells	25621	1110/60211	1425/93663	-5.80953	-5.2435	1.21171
SRX17045817	Nelfe	ES cells	9792	335/60211	361/93663	-5.80058	-5.23585	1.44354
SRX2737376	Suz12	ES cells	441	29/60211	8/93663	-5.79952	-5.23585	5.63898
SRX3176040	Suz12	ES cells	533	29/60211	8/93663	-5.79952	-5.23585	5.63898
SRX5023751	Sox2	ES cells	264	29/60211	8/93663	-5.79952	-5.23585	5.63898
SRX5463258	Suz12	ES cells	284	29/60211	8/93663	-5.79952	-5.23585	5.63898
SRX604256	Suv39h2	mESC derived neural cells	374	29/60211	8/93663	-5.79952	-5.23585	5.63898
SRX747757	Hnrnpl	ES cells	614	29/60211	8/93663	-5.79952	-5.23585	5.63898
SRX7685624	Rad21	ES cells	416	29/60211	8/93663	-5.79952	-5.23585	5.63898
SRX8428659	Ezh2	Embryoid Bodies	410	29/60211	8/93663	-5.79952	-5.23585	5.63898
SRX9426634	Stat1	ES cells	473	29/60211	8/93663	-5.79952	-5.23585	5.63898
SRX11540052	Ctnnb1	EpiLC	5610	196/60211	186/93663	-5.7974	-5.23396	1.63921
SRX7687351	Pou5f1	EpiLC	974	59/60211	33/93663	-5.79405	-5.23112	2.78119
SRX1622690	GFP	ES cells	2080	89/60211	63/93663	-5.79386	-5.23112	2.19756
SRX4159338	Epitope tags	F9	2044	89/60211	63/93663	-5.79386	-5.23112	2.19756
SRX5436010	Suz12	ES cells	379	28/60211	7/93663	-5.79078	-5.22828	6.22232
SRX16844921	GFP	ES cells	21803	1007/60211	1280/93663	-5.78977	-5.2275	1.2238
SRX2831315	Sumo1	ES cells	21917	283/60211	295/93663	-5.78832	-5.22629	1.4923
SRX19838666	Kmt2b	ES cells	14788	392/60211	436/93663	-5.78705	-5.22525	1.39859
SRX5360257	Isl1	mESC derived cardiac cells	5565	63/60211	37/93663	-5.78681	-5.22524	2.64869
SRX16989239	Pou5f1	ES cells	9334	317/60211	338/93663	-5.77289	-5.21156	1.45893
SRX16844900	GFP	ES cells	20658	852/60211	1063/93663	-5.77144	-5.21034	1.24681
SRX1602647	Kmt2b	ES cells	6310	161/60211	144/93663	-5.76994	-5.20924	1.73922
SRX026523	GFP	ES cells	6135	331/60211	357/93663	-5.76987	-5.20924	1.44229
SRX9695052	Ctcf	iPS cells	7026	377/60211	417/93663	-5.76605	-5.20565	1.40636
SRX2404536	Sin3a	NSC-derived iPS cells	14893	694/60211	844/93663	-5.76548	-5.20531	1.27911
SRX7175339	Yy1	ES cells	14509	352/60211	384/93663	-5.75907	-5.19914	1.42595
ERX1493885	Epitope tags	ES cells	753	42/60211	18/93663	-5.75715	-5.19791	3.62969
SRX1049910	Epitope tags	ES cells	2442	42/60211	18/93663	-5.75715	-5.19791	3.62969
SRX348395	Ehmt2	ES cells	745	42/60211	18/93663	-5.75715	-5.19791	3.62969
SRX7685640	Rad21	ES cells	4296	229/60211	227/93663	-5.7479	-5.1889	1.56929
SRX11677008	Tbp	ES cells	38404	1681/60211	2245/93663	-5.73894	-5.18017	1.16478
SRX14812517	Trim24	ES cells	41881	922/60211	1162/93663	-5.7385	-5.18011	1.23429
SRX10641288	Ctcf	ES cells	2308	138/60211	118/93663	-5.73831	-5.18011	1.81924
SRX14311042	Epitope tags	ES cells	601	37/60211	14/93663	-5.73657	-5.18011	4.11117
SRX2440064	Epitope tags	ES cells	938	37/60211	14/93663	-5.73657	-5.18011	4.11117
SRX2638679	Htatsf1	ES cells	728	37/60211	14/93663	-5.73657	-5.18011	4.11117
SRX3584657	Epitope tags	ES cells	646	37/60211	14/93663	-5.73657	-5.18011	4.11117
SRX4394233	Psip1	ES cells	571	37/60211	14/93663	-5.73657	-5.18011	4.11117
SRX8844231	Hif1a	EpiSC	481	37/60211	14/93663	-5.73657	-5.18011	4.11117
SRX8926860	Epitope tags	EpiSC	537	37/60211	14/93663	-5.73657	-5.18011	4.11117
SRX9784440	Epitope tags	ES cells	466	37/60211	14/93663	-5.73657	-5.18011	4.11117
SRX1158299	Rnf2	ES cells	32363	1172/60211	1515/93663	-5.73171	-5.17548	1.20339
SRX4887838	Hdac3	ES cells	15267	555/60211	655/93663	-5.72965	-5.17365	1.31809
SRX1591000	Tet2	ES cells	1206	68/60211	42/93663	-5.72923	-5.17347	2.51856
SRX9195283	Epitope tags	ES cells	12667	440/60211	501/93663	-5.7231	-5.16757	1.36618
SRX2486175	Epitope tags	ES cells	4893	169/60211	154/93663	-5.72175	-5.16645	1.7071
SRX3962338	Pou5f1	ES cells	1625	66/60211	40/93663	-5.71614	-5.16107	2.56671
SRX9195293	Epitope tags	ES cells	13335	482/60211	557/93663	-5.71249	-5.15765	1.34612
SRX4980238	Hoxb1	ES cells	1337	53/60211	28/93663	-5.71173	-5.15712	2.94449
SRX11123496	Sox2	ES cells	2150	106/60211	82/93663	-5.70031	-5.14593	2.01087
SRX1049912	Epitope tags	ES cells	2546	48/60211	23/93663	-5.69799	-5.14384	3.24643
SRX5023710	Esrrb	ES cells	12971	420/60211	474/93663	-5.69633	-5.14241	1.37836
SRX11540064	Ctnnb1	EpiLC	4024	142/60211	123/93663	-5.69532	-5.14163	1.79587
SRX12124760	Yy1	ES cells	9729	215/60211	210/93663	-5.68863	-5.13516	1.59262
SRX8003652	Dendra2	ES cells	7642	326/60211	351/93663	-5.68799	-5.13475	1.44478
SRX4159353	Epitope tags	F9	2301	78/60211	52/93663	-5.67795	-5.12494	2.33337
SRX490476	Taf9b	mESC derived neural cells	2300	90/60211	65/93663	-5.67481	-5.12203	2.15388
SRX13332960	Kmt2d	ES cells	29215	907/60211	1143/93663	-5.674	-5.12145	1.23439
SRX9641160	Ctnnb1	ES cells	12466	427/60211	484/93663	-5.6733	-5.12098	1.37238
SRX218272	Epitope tags	ES cells	8093	288/60211	303/93663	-5.67095	-5.11886	1.47857
SRX16844896	GFP	ES cells	19333	843/60211	1053/93663	-5.66905	-5.11719	1.24535
SRX9195287	Epitope tags	ES cells	11111	373/60211	413/93663	-5.66246	-5.11083	1.40492
SRX9450552	Otx2	ES cells	26902	978/60211	1243/93663	-5.65609	-5.10488	1.22394
SRX11998572	Hdac1	ES cells	7107	185/60211	174/93663	-5.65606	-5.10488	1.65392
SRX2545596	Tet3	ES cells	10642	379/60211	421/93663	-5.6516	-5.10065	1.40039
SRX2609731	Btaf1	ES cells	107513	2107/60211	2866/93663	-5.64357	-5.09285	1.14362
SRX6691034	Smc3	ES cells	1639	52/60211	27/93663	-5.63768	-5.08719	2.99593
SRX14059488	Pbrm1	ES cells	656	34/60211	12/93663	-5.63345	-5.08432	4.40748
SRX2440065	Epitope tags	ES cells	606	34/60211	12/93663	-5.63345	-5.08432	4.40748
SRX2776972	Suz12	ES cells	750	34/60211	12/93663	-5.63345	-5.08432	4.40748
SRX9172017	Pou5f1	ES cells	592	34/60211	12/93663	-5.63345	-5.08432	4.40748
SRX9426630	Stat1	ES cells	501	34/60211	12/93663	-5.63345	-5.08432	4.40748
SRX9426652	Stat2	ES cells	461	34/60211	12/93663	-5.63345	-5.08432	4.40748
SRX9695059	Ctcf	iPS cells	4578	254/60211	260/93663	-5.63261	-5.08371	1.51968
SRX7176623	Ssrp1	ES cells	3732	128/60211	107/93663	-5.62351	-5.07483	1.86088
SRX4301434	Smarca4	mESC derived cardiac cells	16273	533/60211	627/93663	-5.62245	-5.074	1.32237
SRX12204127	Smc1a	ES cells	7425	376/60211	417/93663	-5.61935	-5.07113	1.40263
SRX13061824	Biotin	ES cells	1074	39/60211	16/93663	-5.61652	-5.0692	3.79173
SRX5251395	Smad4	Embryoid Bodies	796	39/60211	16/93663	-5.61652	-5.0692	3.79173
SRX6454763	GFP	ES cells	1010	39/60211	16/93663	-5.61652	-5.0692	3.79173
SRX6691033	Smc3	ES cells	1110	39/60211	16/93663	-5.61652	-5.0692	3.79173
SRX590294	Epitope tags	ES cells	1278	46/60211	22/93663	-5.61613	-5.06904	3.25258
SRX16844907	GFP	ES cells	13524	466/60211	537/93663	-5.61526	-5.06839	1.34991
SRX1557259	Smad2	P19	421	24/60211	5/93663	-5.6132	-5.06701	7.46678
SRX1589701	Ogt	ES cells	189	24/60211	5/93663	-5.6132	-5.06701	7.46678
SRX3738845	Mtf2	ES cells	461	24/60211	5/93663	-5.6132	-5.06701	7.46678
SRX16844918	GFP	ES cells	20412	960/60211	1219/93663	-5.60963	-5.06367	1.22507
SRX16844895	GFP	ES cells	14801	683/60211	833/93663	-5.60923	-5.06349	1.27546
SRX14663243	GFP	ES cells	17369	586/60211	700/93663	-5.60696	-5.06145	1.30224
SRX7988746	Epitope tags	ES cells	2547	56/60211	31/93663	-5.60565	-5.06036	2.81008
ERX631816	Dnmt1	ES cells	464	22/60211	4/93663	-5.6036	-5.05854	8.55569
SRX1592541	Pou5f1	ES cells	7888	247/60211	251/93663	-5.60105	-5.05621	1.53079
SRX128218	Pou5f1	ES cells	2175	78/60211	53/93663	-5.60021	-5.0556	2.28934
SRX368304	Kansl3	ES cells	4913	183/60211	172/93663	-5.59714	-5.05275	1.65506
SRX1639488	Elob	ES cells	1257	62/60211	37/93663	-5.59342	-5.04926	2.60665
SRX1404238	Cbfa2t2	ES cells	3945	172/60211	159/93663	-5.59275	-5.04881	1.68277
SRX10280218	Smarca4	Embryoid Bodies	728	43/60211	19/93663	-5.58814	-5.04465	3.52052
SRX1092374	Daxx	ES cells	765	43/60211	19/93663	-5.58814	-5.04465	3.52052
SRX5023731	Pou5f1	ES cells	13286	486/60211	565/93663	-5.58349	-5.04022	1.33807
SRX9450551	Otx2	ES cells	23929	823/60211	1028/93663	-5.5826	-5.03956	1.24537
SRX2897262	E2f1	ES cells	3840	111/60211	88/93663	-5.57316	-5.03034	1.96215
SRX9450502	Med1	ES cells	4406	158/60211	143/93663	-5.56536	-5.02276	1.71875
SRX4403320	Sin3a	ES cells	5037	173/60211	160/93663	-5.56509	-5.02272	1.68197
SRX1035394	Gata2	mESC derived haematopoietic progenitor	576	33/60211	11/93663	-5.56284	-5.0227	4.66674
SRX1036414	Smarcc1	ES cells	516	33/60211	11/93663	-5.56284	-5.0227	4.66674
SRX2575114	Cbx3	mESC derived neural cells	699	33/60211	11/93663	-5.56284	-5.0227	4.66674
SRX2744940	Cbx5	ES cells	723	33/60211	11/93663	-5.56284	-5.0227	4.66674
SRX2744968	Cbx3	ES cells	804	33/60211	11/93663	-5.56284	-5.0227	4.66674
SRX6409834	Myc	mESCs, differentiated	581	33/60211	11/93663	-5.56284	-5.0227	4.66674
SRX6889520	Elob	ES cells	570	33/60211	11/93663	-5.56284	-5.0227	4.66674
SRX7505449	Mnx1	mESC derived neural cells	659	33/60211	11/93663	-5.56284	-5.0227	4.66674
SRX9101869	Ctnnb1	ES cells	694	33/60211	11/93663	-5.56284	-5.0227	4.66674
SRX9426633	Stat1	ES cells	492	33/60211	11/93663	-5.56284	-5.0227	4.66674
SRX055317	Kdm5a	ES cells	700	31/60211	10/93663	-5.55438	-5.01712	4.8223
SRX1334363	Kmt2a	EpiSC	624	31/60211	10/93663	-5.55438	-5.01712	4.8223
SRX1338524	Med1	ES cells	588	31/60211	10/93663	-5.55438	-5.01712	4.8223
SRX147770	Rnf2	ES cells	607	31/60211	10/93663	-5.55438	-5.01712	4.8223
SRX1639490	Elob	ES cells	662	31/60211	10/93663	-5.55438	-5.01712	4.8223
SRX2744967	Cbx3	ES cells	506	31/60211	10/93663	-5.55438	-5.01712	4.8223
SRX4988101	Etv5	ES cells	508	31/60211	10/93663	-5.55438	-5.01712	4.8223
SRX5023736	Pou5f1	ES cells	392	31/60211	10/93663	-5.55438	-5.01712	4.8223
SRX5027404	Pcgf6	ES cells	535	31/60211	10/93663	-5.55438	-5.01712	4.8223
SRX5027407	Pcgf3	ES cells	508	31/60211	10/93663	-5.55438	-5.01712	4.8223
SRX5463232	Mtf2	ES cells	352	31/60211	10/93663	-5.55438	-5.01712	4.8223
SRX5850007	Epitope tags	ES cells	530	31/60211	10/93663	-5.55438	-5.01712	4.8223
SRX9426635	Stat1	ES cells	488	31/60211	10/93663	-5.55438	-5.01712	4.8223
SRX1602646	Kmt2b	ES cells	2639	79/60211	54/93663	-5.54761	-5.01057	2.27576
SRX9641161	Ctnnb1	ES cells	2062	67/60211	42/93663	-5.54733	-5.01051	2.48152
SRX032464	GFP	ES cells	5911	309/60211	331/93663	-5.54216	-5.00556	1.45219
SRX1338523	Smc3	ES cells	3412	45/60211	21/93663	-5.53308	-4.99736	3.33338
SRX1706936	Pou5f1	mESCs, differentiated	1037	45/60211	21/93663	-5.53308	-4.99736	3.33338
SRX342712	Kmt2d	ES cells	1005	45/60211	21/93663	-5.53308	-4.99736	3.33338
SRX4735802	Pou5f1	ES cells	857	45/60211	21/93663	-5.53308	-4.99736	3.33338
SRX11221944	Taf1	ES cells	28542	1119/60211	1446/93663	-5.53009	-4.99459	1.2038
SRX14059477	Pbrm1	ES cells	704	38/60211	15/93663	-5.52946	-4.9944	3.9408
SRX3537874	Epitope tags	ES cells	773	38/60211	15/93663	-5.52946	-4.9944	3.9408
SRX13061822	Biotin	ES cells	743	41/60211	18/93663	-5.52294	-4.98832	3.54326
SRX1404239	Cbfa2t2	ES cells	1226	41/60211	18/93663	-5.52294	-4.98832	3.54326
SRX11003438	Epitope tags	ES cells	189	27/60211	7/93663	-5.51937	-4.9865	6.00009
SRX1117838	Suz12	ES cells	396	27/60211	7/93663	-5.51937	-4.9865	6.00009
SRX1706945	Lhx3	mESCs, differentiated	593	27/60211	7/93663	-5.51937	-4.9865	6.00009
SRX2415031	Dgcr8	ES cells	507	27/60211	7/93663	-5.51937	-4.9865	6.00009
SRX2737369	Mtf2	ES cells	397	27/60211	7/93663	-5.51937	-4.9865	6.00009
SRX2737377	Suz12	ES cells	432	27/60211	7/93663	-5.51937	-4.9865	6.00009
SRX5463251	Suz12	ES cells	267	27/60211	7/93663	-5.51937	-4.9865	6.00009
SRX5463263	Suz12	ES cells	231	27/60211	7/93663	-5.51937	-4.9865	6.00009
SRX7643904	Smad1	ES cells	5635	189/60211	180/93663	-5.51782	-4.98538	1.63336
SRX031663	Yy1	ES cells	575	25/60211	6/93663	-5.51679	-4.98538	6.48158
SRX1342335	Parp1	ES cells	492	25/60211	6/93663	-5.51679	-4.98538	6.48158
SRX5023738	Pou5f1	ES cells	313	25/60211	6/93663	-5.51679	-4.98538	6.48158
SRX5436006	Suz12	ES cells	400	25/60211	6/93663	-5.51679	-4.98538	6.48158
SRX8428657	Suz12	Embryoid Bodies	238	25/60211	6/93663	-5.51679	-4.98538	6.48158
SRX10641416	Ctcf	ES cells	1611	106/60211	83/93663	-5.51557	-4.98538	1.98664
SRX997160	Brd2	ES cells	8589	106/60211	83/93663	-5.51557	-4.98538	1.98664
SRX1688255	Ruvbl1	ES cells	772	30/60211	9/93663	-5.51436	-4.98538	5.18527
SRX2737371	Mtf2	ES cells	394	30/60211	9/93663	-5.51436	-4.98538	5.18527
SRX4980266	Hoxb1	ES cells	631	30/60211	9/93663	-5.51436	-4.98538	5.18527
SRX498210	Esrrb	ZHBTc4	520	30/60211	9/93663	-5.51436	-4.98538	5.18527
[truncated: 4,776 more rows]

## Sheet: Accessible canonical
Accessible canonical nucleosome vs nonaccessible canonical nucleosome
ID	Antigen	Cell	Num of Peaks	Overlaps with dataset	Overlaps with Control	Log P-val	Log Q-val	Fold Enrichment
SRX12702095	Smad2	ES cells	2033	241/2291	33/93663	-324	-324	298.57
SRX19028398	Epitope tags	ES cells	1891	251/2291	39/93663	-324	-324	263.119
SRX14663252	Pml	ES cells	1767	241/2291	41/93663	-324	-324	240.312
SRX12702096	Smad2	ES cells	2290	262/2291	51/93663	-324	-324	210.026
SRX14663251	Pml	ES cells	2259	250/2291	53/93663	-324	-324	192.844
SRX13999589	Nelfe	ES cells	5659	441/2291	107/93663	-324	-324	168.499
SRX111876	Rbbp5	ES cells	6098	382/2291	93/93663	-324	-324	167.928
SRX111885	Rbbp5	ES cells	4786	282/2291	70/93663	-324	-324	164.7
SRX19028473	Cpsf3l	ES cells	3945	330/2291	83/93663	-324	-324	162.547
SRX3341233	Bap1	ES cells	3077	365/2291	95/93663	-324	-324	157.077
SRX14663253	Pml	ES cells	6470	518/2291	135/93663	-324	-324	156.87
SRX11221894	Med1	ES cells	2923	284/2291	77/93663	-324	-324	150.789
SRX9424488	GFP	ES cells	4714	311/2291	85/93663	-324	-324	149.584
SRX14134857	Supt5	ES cells	7180	603/2291	166/93663	-324	-324	148.509
SRX14663254	Pml	ES cells	6740	535/2291	149/93663	-324	-324	146.795
SRX14059485	Arid2	ES cells	4349	347/2291	97/93663	-324	-324	146.252
SRX319557	Nanog	ES cells	3455	265/2291	76/93663	-324	-324	142.553
SRX13439118	DNA-RNA hybrid	ES cells	4088	316/2291	92/93663	-324	-324	140.424
SRX9424489	GFP	ES cells	6336	446/2291	130/93663	-324	-324	140.26
SRX19028481	Supt5	ES cells	5890	478/2291	141/93663	-324	-324	138.596
SRX11676994	Rpa1	ES cells	4895	482/2291	143/93663	-324	-324	137.802
SRX16844930	GFP	ES cells	4197	387/2291	115/93663	-324	-324	137.58
SRX19028482	Supt5	ES cells	3913	349/2291	104/93663	-324	-324	137.194
SRX14663255	Pml	ES cells	7916	743/2291	225/93663	-324	-324	135.005
SRX9424473	Ep400	ES cells	3177	369/2291	112/93663	-324	-324	134.695
SRX5371700	Sp1	ES cells	4946	512/2291	157/93663	-324	-324	133.326
SRX13439146	DNA-RNA hybrid	ES cells	6741	526/2291	162/93663	-324	-324	132.744
SRX13439142	DNA-RNA hybrid	ES cells	5057	367/2291	114/93663	-324	-324	131.615
SRX4167133	Taf2	ES cells	10090	673/2291	210/93663	-324	-324	131.02
SRX19028418	Cpsf3l	ES cells	6178	448/2291	140/93663	-324	-324	130.826
SRX11417003	GFP	ES cells	2779	274/2291	86/93663	-324	-324	130.255
SRX9424474	Ep400	ES cells	2343	299/2291	94/93663	-324	-324	130.043
SRX7568557	Dendra2	ES cells	2517	258/2291	82/93663	-324	-324	128.632
SRX017059	Supt5	ES cells	4542	393/2291	125/93663	-324	-324	128.536
SRX11221912	Taf1	ES cells	5727	574/2291	183/93663	-324	-324	128.234
SRX14663256	Pml	ES cells	8727	795/2291	254/93663	-324	-324	127.961
SRX9424472	Ep400	ES cells	2427	281/2291	90/93663	-324	-324	127.646
SRX5850131	Nrf1	ES cells	3187	316/2291	102/93663	-324	-324	126.657
SRX523449	Atrx	ES cells	5195	333/2291	108/93663	-324	-324	126.056
SRX11676995	Rpa1	ES cells	3572	343/2291	112/93663	-324	-324	125.204
SRX385376	GFP	ES cells	2860	248/2291	81/93663	-324	-324	125.173
SRX2486175	Epitope tags	ES cells	4893	470/2291	154/93663	-324	-324	124.773
SRX14663257	Smad2	ES cells	8270	675/2291	222/93663	-324	-324	124.306
SRX7670008	Gtf2b	ES cells	5394	450/2291	148/93663	-324	-324	124.306
SRX19028474	Cpsf3l	ES cells	7069	592/2291	195/93663	-324	-324	124.117
SRX668246	Cdk7	ES cells	3682	308/2291	102/93663	-324	-324	123.451
SRX647909	Epitope tags	ES cells	4702	338/2291	112/93663	-324	-324	123.379
SRX14663258	Smad2	ES cells	8858	670/2291	223/93663	-324	-324	122.832
SRX7670009	Gtf2b	ES cells	5762	441/2291	147/93663	-324	-324	122.649
SRX9424491	GFP	ES cells	5480	250/2291	84/93663	-324	-324	121.676
SRX3602876	Brd4	iPS cells	6889	270/2291	92/93663	-324	-324	119.983
SRX9424490	GFP	ES cells	5752	267/2291	91/93663	-324	-324	119.953
SRX5850138	Nrf1	ES cells	3259	264/2291	90/93663	-324	-324	119.924
SRX7670005	Gtf2b	ES cells	6188	512/2291	175/93663	-324	-324	119.612
SRX11417018	GFP	ES cells	6365	550/2291	189/93663	-324	-324	118.972
SRX825831	Runx1	mESC derived myeloid progenitors	5804	511/2291	176/93663	-324	-324	118.7
SRX5371701	Sp1	ES cells	4591	470/2291	162/93663	-324	-324	118.611
SRX3602859	Brd4	iPS cells	8997	327/2291	113/93663	-324	-324	118.308
SRX11221909	Taf1	ES cells	7130	652/2291	226/93663	-324	-324	117.946
SRX1177003	Brd4	ES cells	4509	262/2291	91/93663	-324	-324	117.707
SRX2415039	Mettl3	ES cells	5468	381/2291	133/93663	-324	-324	117.116
SRX1080404	Smad2	Embryoid Bodies	4193	312/2291	109/93663	-324	-324	117.023
SRX17708153	L3mbtl2	ES cells	4949	346/2291	121/93663	-324	-324	116.905
SRX19838669	Setd1a	ES cells	5724	480/2291	168/93663	-324	-324	116.809
SRX1036410	Pou5f1	ES cells	5009	454/2291	159/93663	-324	-324	116.735
SRX11221924	Ercc3	ES cells	9401	459/2291	161/93663	-324	-324	116.555
SRX5173625	Epitope tags	ES cells	6775	478/2291	168/93663	-324	-324	116.322
SRX10445760	Epitope tags	ES cells	3623	332/2291	117/93663	-324	-324	116.01
SRX027460	E2f4	iPS cells	5250	501/2291	177/93663	-324	-324	115.72
SRX5850136	Nrf1	ES cells	3311	305/2291	108/93663	-324	-324	115.457
SRX9450296	Epitope tags	ES cells	2797	271/2291	96/93663	-324	-324	115.409
SRX11417010	GFP	ES cells	5411	434/2291	154/93663	-324	-324	115.216
SRX14617741	Ash1l	ES cells	4404	400/2291	142/93663	-324	-324	115.163
SRX1602659	Kmt2b	ES cells	4974	318/2291	113/93663	-324	-324	115.051
SRX2830662	Setd1a	ES cells	6454	605/2291	217/93663	-324	-324	113.983
SRX19028416	0610010K14Rik	ES cells	5721	404/2291	145/93663	-324	-324	113.909
SRX015832	Kdm5a	ES cells	4406	378/2291	136/93663	-324	-324	113.631
SRX1080407	Smad2	Embryoid Bodies	3681	283/2291	102/93663	-324	-324	113.43
SRX7568547	Dendra2	ES cells	2778	277/2291	100/93663	-324	-324	113.246
SRX022048	Tbp	ES cells	6224	488/2291	177/93663	-324	-324	112.717
SRX14134854	Epitope tags	ES cells	8697	697/2291	253/93663	-324	-324	112.63
SRX3602870	Brd4	iPS cells	6667	314/2291	114/93663	-324	-324	112.608
SRX11417008	GFP	ES cells	4773	434/2291	158/93663	-324	-324	112.299
SRX4397590	Pou5f1	iPS cells	3671	413/2291	151/93663	-324	-324	111.819
SRX19028472	Cpsf3l	ES cells	8178	587/2291	215/93663	-324	-324	111.62
SRX9424477	Ep400	ES cells	5027	546/2291	200/93663	-324	-324	111.611
SRX5850127	Nrf1	ES cells	4159	371/2291	136/93663	-324	-324	111.526
SRX1089842	Gtf2b	Embryoid Bodies	5880	585/2291	215/93663	-324	-324	111.24
SRX1036412	Pou5f1	ES cells	4875	433/2291	160/93663	-324	-324	110.64
SRX11221910	Taf1	ES cells	8780	746/2291	277/93663	-324	-324	110.104
SRX14663259	Smad2	ES cells	10078	804/2291	299/93663	-324	-324	109.933
SRX9424475	Ep400	ES cells	6083	671/2291	250/93663	-324	-324	109.73
SRX14134864	Supt5	ES cells	9071	744/2291	279/93663	-324	-324	109.021
SRX3602861	Brd4	iPS cells	8027	413/2291	155/93663	-324	-324	108.933
SRX11417011	GFP	ES cells	6965	658/2291	247/93663	-324	-324	108.911
SRX7670004	Gtf2b	ES cells	7066	553/2291	208/93663	-324	-324	108.694
SRX7687353	Tet1	ES cells	4123	287/2291	108/93663	-324	-324	108.643
SRX825833	Runx1	mESC derived myeloid progenitors	5305	399/2291	151/93663	-324	-324	108.029
SRX11417017	GFP	ES cells	5708	507/2291	192/93663	-324	-324	107.957
SRX5850128	Nrf1	ES cells	4017	285/2291	108/93663	-324	-324	107.886
SRX5850134	Nrf1	ES cells	3599	261/2291	99/93663	-324	-324	107.783
SRX11221931	Med4	ES cells	4382	347/2291	132/93663	-324	-324	107.473
SRX19838668	Setd1a	ES cells	6595	534/2291	204/93663	-324	-324	107.017
SRX8722031	Ythdc1	ES cells	6318	314/2291	120/93663	-324	-324	106.977
SRX3602862	Brd4	iPS cells	6288	312/2291	120/93663	-324	-324	106.296
SRX11417009	GFP	ES cells	5669	467/2291	180/93663	-324	-324	106.069
SRX6716555	Ash2l	ES cells	4191	262/2291	101/93663	-324	-324	106.053
SRX5883474	Stat3	ES cells	7846	375/2291	145/93663	-324	-324	105.732
SRX9731387	Epitope tags	ES cells	6703	499/2291	193/93663	-324	-324	105.703
SRX3602868	Brd4	iPS cells	8059	408/2291	158/93663	-324	-324	105.571
SRX5850135	Nrf1	ES cells	4054	335/2291	130/93663	-324	-324	105.352
SRX1688324	Gtf3c1	ES cells	8642	738/2291	288/93663	-324	-324	104.763
SRX14134858	Supt5	ES cells	10564	844/2291	330/93663	-324	-324	104.561
SRX17045822	Nelfe	ES cells	7956	741/2291	290/93663	-324	-324	104.463
SRX5850140	Sp1	ES cells	4165	270/2291	106/93663	-324	-324	104.136
SRX14134863	Supt5	ES cells	9399	764/2291	300/93663	-324	-324	104.115
SRX3175620	Setd1a	ES cells	7387	686/2291	271/93663	-324	-324	103.49
SRX19028438	Epitope tags	ES cells	6390	370/2291	147/93663	-324	-324	102.903
SRX12622653	Med14	ES cells	2953	273/2291	109/93663	-324	-324	102.395
SRX1602654	Kmt2b	ES cells	5418	337/2291	135/93663	-324	-324	102.056
SRX1089840	Gtf2b	ES cells	5125	537/2291	216/93663	-324	-324	101.64
SRX12702092	GFP	ES cells	9674	611/2291	246/93663	-324	-324	101.543
SRX11417016	GFP	ES cells	7470	745/2291	300/93663	-324	-324	101.526
SRX4397577	Pou5f1	iPS cells	7823	697/2291	281/93663	-324	-324	101.407
SRX11221911	Taf1	ES cells	7977	714/2291	288/93663	-324	-324	101.356
SRX373166	GFP	ES cells	4612	520/2291	210/93663	-324	-324	101.234
SRX9195294	Epitope tags	ES cells	9465	727/2291	294/93663	-324	-324	101.095
SRX1602647	Kmt2b	ES cells	6310	356/2291	144/93663	-324	-324	101.072
SRX11221930	Med4	ES cells	6023	469/2291	190/93663	-324	-324	100.917
SRX8832796	Epitope tags	ES cells	9642	469/2291	190/93663	-324	-324	100.917
SRX6716554	Ash2l	ES cells	6436	446/2291	181/93663	-324	-324	100.739
SRX10978094	Banp	mESC derived neural cells	3234	263/2291	107/93663	-324	-324	100.488
SRX17045821	Nelfe	ES cells	9084	805/2291	328/93663	-324	-324	100.338
SRX16844928	GFP	ES cells	7423	642/2291	262/93663	-324	-324	100.179
SRX16844927	GFP	ES cells	8939	849/2291	347/93663	-324	-324	100.028
SRX1053802	Kat5	ES cells	6861	574/2291	236/93663	-324	-324	99.4358
SRX1639483	Epop	ES cells	4880	369/2291	152/93663	-324	-324	99.2489
SRX11676996	Rpa1	ES cells	8939	751/2291	311/93663	-324	-324	98.7239
SRX9450258	Nelfe	ES cells	12111	864/2291	358/93663	-324	-324	98.6674
SRX9195291	Epitope tags	ES cells	9009	717/2291	298/93663	-324	-324	98.3662
SRX19028477	Ints5	ES cells	9177	716/2291	298/93663	-324	-324	98.229
SRX5850130	Nrf1	ES cells	4411	307/2291	128/93663	-324	-324	98.0554
SRX8701147	Ythdc1	ES cells	6839	332/2291	139/93663	-324	-324	97.6487
SRX11417006	GFP	ES cells	6299	563/2291	236/93663	-324	-324	97.5303
SRX8701160	Mettl3	ES cells	8002	317/2291	133/93663	-324	-324	97.443
SRX2172624	Brd4	ES cells	9007	376/2291	158/93663	-324	-324	97.2912
SRX17045817	Nelfe	ES cells	9792	856/2291	361/93663	-324	-324	96.9415
SRX208055	Rara	ES cells	14742	575/2291	243/93663	-324	-324	96.7397
SRX5850156	Yy1	ES cells	7070	279/2291	118/93663	-324	-324	96.6641
SRX9424476	Ep400	ES cells	7352	749/2291	317/93663	-324	-324	96.5974
SRX11221923	Ercc3	ES cells	13835	793/2291	338/93663	-324	-324	95.9179
SRX2545589	Tet3	ES cells	3766	272/2291	116/93663	-324	-324	95.8636
SRX3602879	Brd4	iPS cells	11867	544/2291	232/93663	-324	-324	95.8636
SRX5850142	Sp1	ES cells	8472	630/2291	269/93663	-324	-324	95.7483
SRX4397587	Pou5f1	iPS cells	3990	442/2291	189/93663	-324	-324	95.61
SRX13439141	Xrn2	ES cells	8493	465/2291	199/93663	-324	-324	95.5307
SRX13439139	Xrn2	ES cells	4244	257/2291	110/93663	-324	-324	95.5176
SRX2486180	Cxxc1	ES cells	8508	494/2291	212/93663	-324	-324	95.2652
SRX2404541	Sin3a	NSC-derived iPS cells	5809	487/2291	209/93663	-324	-324	95.2633
SRX2831931	Kmt2d	ES cells	6875	417/2291	179/93663	-324	-324	95.2415
SRX3602866	Brd4	iPS cells	6730	284/2291	122/93663	-324	-324	95.1703
SRX16844929	GFP	ES cells	6126	533/2291	229/93663	-324	-324	95.1557
SRX2404542	Sin3a	NSC-derived iPS cells	4505	378/2291	163/93663	-324	-324	94.8085
SRX12622655	Med14	ES cells	5560	510/2291	220/93663	-324	-324	94.7743
SRX8701296	Ythdc1	ES cells	6962	333/2291	144/93663	-324	-324	94.542
SRX17708154	L3mbtl2	ES cells	6219	409/2291	177/93663	-324	-324	94.4698
SRX10111409	Chd8	ES cells	14868	861/2291	373/93663	-324	-324	94.3707
SRX4403320	Sin3a	ES cells	5037	368/2291	160/93663	-324	-324	94.0309
SRX9450259	Nelfe	ES cells	13836	839/2291	365/93663	-324	-324	93.9749
SRX3602863	Brd4	iPS cells	5002	308/2291	134/93663	-324	-324	93.9699
SRX2831930	Kmt2d	ES cells	7323	439/2291	191/93663	-324	-324	93.9667
SRX11417012	GFP	ES cells	11591	824/2291	359/93663	-324	-324	93.8374
SRX3200438	Brd4	mESC derived haemogenic endothelium	7847	635/2291	277/93663	-324	-324	93.721
SRX054580	Dpy30	ES cells	14740	789/2291	345/93663	-324	-324	93.4977
SRX825832	Runx1	mESC derived myeloid progenitors	6478	429/2291	188/93663	-324	-324	93.2916
SRX19028475	Ints5	ES cells	8670	599/2291	263/93663	-324	-324	93.1138
SRX16844899	GFP	ES cells	8359	767/2291	337/93663	-324	-324	93.0483
SRX19028436	Epitope tags	ES cells	11920	712/2291	313/93663	-324	-324	92.9991
SRX368312	Kansl3	mESC derived neural cells	6397	523/2291	230/93663	-324	-324	92.9644
SRX16844915	GFP	ES cells	10175	812/2291	358/93663	-324	-324	92.7291
SRX19028417	0610010K14Rik	ES cells	10018	723/2291	320/93663	-324	-324	92.3701
SRX11998572	Hdac1	ES cells	7107	393/2291	174/93663	-324	-324	92.3392
SRX5850146	Sp1	ES cells	5292	365/2291	162/93663	-324	-324	92.113
SRX5850103	Gabpa	ES cells	4743	340/2291	151/93663	-324	-324	92.0545
SRX997158	Brd4	ES cells	6833	319/2291	142/93663	-324	-324	91.8428
SRX5850133	Nrf1	ES cells	3851	305/2291	136/93663	-324	-324	91.6862
SRX3602869	Brd4	iPS cells	4700	269/2291	120/93663	-324	-324	91.6461
SRX9596424	Trim28	ES cells	15377	763/2291	341/93663	-324	-324	91.4773
SRX5394949	Myc	ES cells	5193	404/2291	181/93663	-324	-324	91.2527
SRX5850143	Sp1	ES cells	8035	517/2291	232/93663	-324	-324	91.1057
SRX5850147	Sp1	ES cells	7857	512/2291	230/93663	-324	-324	91.0092
SRX4403326	Sin3a	ES cells	8668	577/2291	260/93663	-324	-324	90.7289
SRX13439145	DNA-RNA hybrid	ES cells	8140	352/2291	159/93663	-324	-324	90.5083
SRX7568556	Dendra2	ES cells	5228	504/2291	228/93663	-324	-324	90.373
SRX2539820	Hdac1	ES cells	10197	532/2291	241/93663	-324	-324	90.248
SRX3602883	Brd4	iPS cells	6639	505/2291	229/93663	-324	-324	90.1569
SRX14210122	Ing5	ES cells	5150	345/2291	157/93663	-324	-324	89.8385
SRX2875255	Kmt2b	ES cells	7994	309/2291	141/93663	-324	-324	89.5947
SRX997162	Brd4	ES cells	8530	453/2291	207/93663	-324	-324	89.4686
SRX3200437	Brd4	mESC derived haemogenic endothelium	8221	632/2291	289/93663	-324	-324	89.4051
SRX5850105	Gabpa	ES cells	7441	446/2291	204/93663	-324	-324	89.3815
SRX868181	Fgfr1	ES cells	11532	892/2291	409/93663	-324	-324	89.163
SRX2545594	Tet3	ES cells	4873	353/2291	162/93663	-324	-324	89.0846
SRX8737173	Dnmt3b	ES cells	5988	390/2291	179/93663	-324	-324	89.0747
SRX5850148	Sp1	ES cells	5752	404/2291	186/93663	-324	-324	88.7997
SRX368305	Kansl3	ES cells	5365	341/2291	157/93663	-324	-324	88.7969
SRX12622650	Med14	ES cells	8779	742/2291	342/93663	-324	-324	88.6994
SRX14134853	Epitope tags	ES cells	11769	879/2291	406/93663	-324	-324	88.5127
SRX14663260	Smad2	ES cells	15455	1056/2291	488/93663	-324	-324	88.4682
SRX11417013	GFP	ES cells	8811	747/2291	346/93663	-324	-324	88.2648
SRX104386	Ncapd3	ES cells	9384	652/2291	302/93663	-324	-324	88.264
SRX6071859	Pcgf6	ES cells	3904	287/2291	133/93663	-324	-324	88.2213
SRX9450254	Setd1a	ES cells	14927	1002/2291	465/93663	-324	-324	88.0963
SRX3030271	Zbtb2	ES cells	7376	543/2291	253/93663	-324	-324	87.745
SRX3581848	E2f6	ES cells	5725	382/2291	178/93663	-324	-324	87.7377
SRX1980012	Crebbp	EpiSC	5560	311/2291	145/93663	-324	-324	87.687
SRX8003651	Dendra2	ES cells	8733	812/2291	379/93663	-324	-324	87.5911
SRX11417000	GFP	ES cells	9900	762/2291	356/93663	-324	-324	87.508
SRX16989253	Sox2	ES cells	10484	691/2291	323/93663	-324	-324	87.4618
SRX12622654	Med14	ES cells	7089	665/2291	311/93663	-324	-324	87.4187
SRX9195281	Epitope tags	ES cells	11125	850/2291	398/93663	-324	-324	87.313
SRX17045819	Epitope tags	ES cells	10566	893/2291	419/93663	-324	-324	87.1325
SRX8003649	Dendra2	ES cells	7940	728/2291	342/93663	-324	-324	87.0258
SRX5850151	Yy1	ES cells	6859	259/2291	122/93663	-324	-324	86.7926
SRX16844898	GFP	ES cells	10894	950/2291	448/93663	-324	-324	86.6939
SRX1519392	Biotin	ES cells	5230	301/2291	142/93663	-324	-324	86.6605
SRX5850141	Sp1	ES cells	6704	501/2291	237/93663	-324	-324	86.4236
SRX11221942	Taf12	ES cells	11810	820/2291	388/93663	-324	-324	86.4023
SRX5850149	Sp1	ES cells	5644	327/2291	155/93663	-324	-324	86.25
SRX3898498	Med1	ES cells	7896	611/2291	291/93663	-324	-324	85.8403
SRX6071860	Pcgf6	ES cells	5648	403/2291	192/93663	-324	-324	85.8118
SRX091896	Tbp	ES cells	6947	340/2291	162/93663	-324	-324	85.8039
SRX19028476	Ints5	ES cells	12711	862/2291	411/93663	-324	-324	85.7449
SRX19028478	Ints5	ES cells	12062	887/2291	423/93663	-324	-324	85.7287
SRX9450260	Nelfe	ES cells	15304	981/2291	468/93663	-324	-324	85.6971
SRX11417007	GFP	ES cells	9013	742/2291	354/93663	-324	-324	85.6927
SRX4167126	Gtf2b	ES cells	13715	1008/2291	481/93663	-324	-324	85.6759
SRX17045818	Nelfe	ES cells	11113	937/2291	448/93663	-324	-324	85.5076
SRX7568543	Dendra2	ES cells	4025	321/2291	154/93663	-324	-324	85.2172
SRX13999590	Nelfe	ES cells	14294	918/2291	441/93663	-324	-324	85.1034
SRX9731385	Epitope tags	ES cells	8053	389/2291	187/93663	-324	-324	85.0454
SRX5850129	Nrf1	ES cells	4379	349/2291	168/93663	-324	-324	84.9296
SRX5850104	Gabpa	ES cells	5097	271/2291	131/93663	-324	-324	84.5748
SRX5850153	Yy1	ES cells	8764	310/2291	150/93663	-324	-324	84.4916
SRX8003652	Dendra2	ES cells	7642	723/2291	351/93663	-324	-324	84.212
SRX2152805	Kmt2b	ES cells	13979	863/2291	419/93663	-324	-324	84.2054
SRX1670221	Med12	ES cells	4841	385/2291	187/93663	-324	-324	84.1709
SRX368304	Kansl3	ES cells	4913	354/2291	172/93663	-324	-324	84.143
SRX11221950	Taf12	ES cells	10750	720/2291	350/93663	-324	-324	84.1022
SRX368313	Kansl3	mESC derived neural cells	7769	594/2291	289/93663	-324	-324	84.0295
SRX9424470	Ino80	ES cells	4318	263/2291	128/93663	-324	-324	84.0018
SRX16844922	GFP	ES cells	9823	914/2291	445/93663	-324	-324	83.971
SRX4506776	Brd4	ES cells	8916	744/2291	363/93663	-324	-324	83.7933
SRX2638678	Htatsf1	ES cells	4869	383/2291	187/93663	-324	-324	83.7337
SRX1690194	Nrf1	ES cells	4401	403/2291	197/93663	-324	-324	83.6338
SRX997154	Brd2	ES cells	8477	441/2291	216/93663	-324	-324	83.4695
SRX5850159	Yy1	ES cells	10055	375/2291	184/93663	-324	-324	83.3214
SRX17045820	Epitope tags	ES cells	11124	921/2291	453/93663	-324	-324	83.1198
SRX15057954	Zic2	mESCs, differentiated	4486	268/2291	132/93663	-324	-324	83.0049
SRX2647968	Kdm5c	EpiLC	4981	357/2291	176/93663	-324	-324	82.9275
SRX3602867	Brd4	iPS cells	14584	687/2291	339/93663	-324	-324	82.8514
SRX9195282	Epitope tags	ES cells	12069	895/2291	442/93663	-324	-324	82.7835
SRX5850144	Sp1	ES cells	10739	830/2291	410/93663	-324	-324	82.7632
SRX213834	Supt5	ES cells	15063	866/2291	428/93663	-324	-324	82.7213
SRX1517381	Epop	ES cells	11137	700/2291	346/93663	-324	-324	82.7113
SRX2486172	Epitope tags	ES cells	11236	969/2291	479/93663	-324	-324	82.7049
SRX1280442	Nrf1	mESC derived neural cells	9807	661/2291	327/93663	-324	-324	82.6412
SRX4578586	Epitope tags	ES cells	9750	773/2291	383/93663	-324	-324	82.5133
SRX997161	Brd4	ES cells	7980	353/2291	175/93663	-324	-324	82.4669
SRX3581849	E2f6	ES cells	7316	494/2291	245/93663	-324	-324	82.4335
SRX11221943	Taf12	ES cells	10364	816/2291	405/93663	-324	-324	82.3717
SRX5850107	Gabpa	ES cells	4841	286/2291	142/93663	-324	-324	82.3419
SRX424007	Kdm4c	ES cells	16351	698/2291	347/93663	-324	-324	82.2373
SRX9195319	Tbp	ES cells	10097	788/2291	392/93663	-324	-324	82.1832
SRX1280440	Nrf1	mESC derived neural cells	8291	595/2291	296/93663	-324	-324	82.1804
SRX4167128	Gtf2b	ES cells	15211	1037/2291	516/93663	-324	-324	82.1622
SRX9195287	Epitope tags	ES cells	11111	829/2291	413/93663	-324	-324	82.063
SRX13439140	Xrn2	ES cells	10702	556/2291	277/93663	-324	-324	82.0612
SRX10111410	Chd8	ES cells	16816	987/2291	493/93663	-324	-324	81.849
SRX12622659	Cdk8	ES cells	6512	468/2291	234/93663	-324	-324	81.766
SRX2545593	Tet3	ES cells	7785	624/2291	312/93663	-324	-324	81.766
SRX3175619	Setd1a	ES cells	9428	844/2291	422/93663	-324	-324	81.766
SRX5850145	Sp1	ES cells	12640	770/2291	385/93663	-324	-324	81.766
SRX16844926	GFP	ES cells	11346	983/2291	493/93663	-324	-324	81.5173
SRX10978092	Banp	mESC derived neural cells	3466	265/2291	133/93663	-324	-324	81.4586
SRX15057959	Zic2	mESCs, differentiated	7765	516/2291	259/93663	-324	-324	81.4503
SRX1602645	Kmt2b	ES cells	13075	788/2291	396/93663	-324	-324	81.3531
SRX12622656	Med14	ES cells	4665	370/2291	186/93663	-324	-324	81.3264
SRX11221880	Med1	ES cells	7174	515/2291	259/93663	-324	-324	81.2925
SRX342721	Kmt2d	Embryoid Bodies	9620	641/2291	323/93663	-324	-324	81.1332
SRX9450255	Setd1a	ES cells	15698	1039/2291	524/93663	-324	-324	81.0639
SRX9195280	Epitope tags	ES cells	12318	914/2291	461/93663	-324	-324	81.0566
SRX3030268	Zbtb2	ES cells	5308	406/2291	205/93663	-324	-324	80.9683
SRX9195290	Epitope tags	ES cells	12925	911/2291	460/93663	-324	-324	80.9662
SRX2486179	Cxxc1	ES cells	12686	797/2291	403/93663	-324	-324	80.853
SRX5850139	Sp1	ES cells	10234	768/2291	389/93663	-324	-324	80.7151
SRX9195316	Tbp	ES cells	11353	843/2291	428/93663	-324	-324	80.5243
SRX12622652	Med14	ES cells	8002	671/2291	341/93663	-324	-324	80.4472
SRX17045815	Epitope tags	ES cells	12155	971/2291	494/93663	-324	-324	80.3591
SRX3898499	Med1	ES cells	10050	679/2291	346/93663	-324	-324	80.23
SRX7568546	Dendra2	ES cells	3753	365/2291	186/93663	-324	-324	80.2274
SRX9596425	Trim28	ES cells	17706	838/2291	428/93663	-324	-324	80.0467
SRX3602858	Brd4	iPS cells	9224	456/2291	234/93663	-324	-324	79.6695
SRX12622649	Med14	ES cells	9517	717/2291	368/93663	-324	-324	79.6552
SRX6078360	Ezh2	ES cells	8456	351/2291	181/93663	-324	-324	79.2814
SRX8003650	Dendra2	ES cells	7614	659/2291	340/93663	-324	-324	79.2409
SRX9195289	Epitope tags	ES cells	12018	910/2291	470/93663	-324	-324	79.1565
SRX13440033	Maz	mESC derived neural cells	6415	303/2291	157/93663	-324	-324	78.9016
SRX10978093	Banp	mESC derived neural cells	3665	274/2291	142/93663	-324	-324	78.887
SRX5850150	Yy1	ES cells	9766	675/2291	350/93663	-324	-324	78.8458
SRX12622648	Med14	ES cells	11565	792/2291	411/93663	-324	-324	78.7819
SRX9101843	Ctnnb1	ES cells	13309	850/2291	442/93663	-324	-324	78.6212
SRX7643904	Smad1	ES cells	5635	346/2291	180/93663	-324	-324	78.5863
SRX5371689	Sp1	ES cells	8381	692/2291	361/93663	-324	-324	78.3686
SRX6784013	Chd2	ES cells	5353	299/2291	156/93663	-324	-324	78.3591
SRX3751912	Brd9	ES cells	5003	385/2291	201/93663	-324	-324	78.3083
SRX17045816	Epitope tags	ES cells	12491	987/2291	516/93663	-324	-324	78.2007
SRX14134856	Nelfe	ES cells	13345	975/2291	510/93663	-324	-324	78.1587
SRX2523712	Kdm2b	iPS cells	7291	384/2291	201/93663	-324	-324	78.1049
SRX997157	Brd4	ES cells	9318	466/2291	244/93663	-324	-324	78.0799
SRX9195285	Epitope tags	ES cells	13164	918/2291	481/93663	-324	-324	78.0262
SRX16844914	GFP	ES cells	11954	877/2291	460/93663	-324	-324	77.9444
SRX19028414	0610010K14Rik	ES cells	11551	682/2291	358/93663	-324	-324	77.8833
SRX8754229	Runx1	ES cells	7712	417/2291	219/93663	-324	-324	77.8458
SRX12798486	Brd4	ES cells	6814	314/2291	165/93663	-324	-324	77.8016
SRX1602644	Men1	ES cells	11108	744/2291	391/93663	-324	-324	77.7928
SRX022047	Tbp	ES cells	13437	924/2291	486/93663	-324	-324	77.7282
SRX9596421	Trim28	ES cells	21060	1003/2291	529/93663	-324	-324	77.5154
SRX5850106	Gabpa	ES cells	7112	379/2291	200/93663	-324	-324	77.4733
SRX19838667	Kmt2b	ES cells	14295	810/2291	428/93663	-324	-324	77.3721
SRX6094544	Kdm2a	ES cells	10345	405/2291	214/93663	-324	-324	77.3721
SRX5850137	Nrf1	ES cells	5818	380/2291	201/93663	-324	-324	77.2913
SRX9195283	Epitope tags	ES cells	12667	947/2291	501/93663	-324	-324	77.2779
SRX142126	Kat8	ES cells	6989	338/2291	179/93663	-324	-324	77.1981
SRX9467492	Epitope tags	EpiSC	7723	396/2291	210/93663	-324	-324	77.0937
SRX14134855	Nelfe	ES cells	13504	988/2291	524/93663	-324	-324	77.0848
SRX1690191	Nrf1	ES cells	4844	418/2291	222/93663	-324	-324	76.9779
SRX9101841	Kdm2b	ES cells	13382	751/2291	399/93663	-324	-324	76.9502
SRX5850155	Yy1	ES cells	10975	380/2291	202/93663	-324	-324	76.9087
SRX4397586	Pou5f1	iPS cells	9474	932/2291	497/93663	-324	-324	76.6659
SRX764230	Epop	ES cells	14132	330/2291	176/93663	-324	-324	76.6557
SRX4397585	Pou5f1	iPS cells	10438	987/2291	527/93663	-324	-324	76.5684
SRX9101842	Ctnnb1	ES cells	14043	799/2291	428/93663	-324	-324	76.3213
SRX1845478	Epitope tags	ES cells	6488	289/2291	155/93663	-324	-324	76.2271
SRX9195315	Tbp	ES cells	12722	896/2291	482/93663	-324	-324	75.9983
SRX1670189	Med12	ES cells	7111	472/2291	254/93663	-324	-324	75.9716
SRX5276471	Myc	ES cells	10069	704/2291	379/93663	-324	-324	75.941
SRX5850157	Yy1	ES cells	9363	352/2291	190/93663	-324	-324	75.7412
SRX504219	Kdm1a	mESC derived mesodermal cells	4244	307/2291	166/93663	-324	-324	75.609
SRX213813	Supt5	ES cells	15745	831/2291	450/93663	-324	-324	75.4973
SRX2545591	Tet3	ES cells	14679	826/2291	448/93663	-324	-324	75.3781
SRX10445757	Epitope tags	ES cells	7773	477/2291	259/93663	-324	-324	75.2942
SRX9101840	Kdm2b	ES cells	13918	792/2291	431/93663	-324	-324	75.1261
SRX9195318	Tbp	ES cells	11053	845/2291	460/93663	-324	-324	75.1003
SRX4167125	Gtf2b	ES cells	16430	1115/2291	607/93663	-324	-324	75.0981
SRX16844907	GFP	ES cells	13524	981/2291	537/93663	-324	-324	74.6857
SRX12622647	Med14	ES cells	9722	679/2291	372/93663	-324	-324	74.6225
SRX10560004	Med12	ES cells	8898	540/2291	296/93663	-324	-324	74.5839
SRX15652597	Nipbl	ES cells	7997	494/2291	271/93663	-324	-324	74.5248
SRX2539819	Hdac1	ES cells	13402	598/2291	329/93663	-324	-324	74.3102
SRX1089850	Tbp	Embryoid Bodies	3813	336/2291	185/93663	-324	-324	74.2524
SRX6071861	Pcgf6	ES cells	7637	528/2291	291/93663	-324	-324	74.1795
SRX16844913	GFP	ES cells	13598	966/2291	533/93663	-324	-324	74.0957
SRX029863	Sin3a	ES cells	4237	276/2291	153/93663	-324	-324	73.7498
SRX2545596	Tet3	ES cells	10642	759/2291	421/93663	-324	-324	73.706
SRX13476151	Maz	mESC derived neural cells	9799	500/2291	278/93663	-324	-324	73.5306
SRX12702091	GFP	ES cells	14654	901/2291	502/93663	-324	-324	73.3777
SRX11417014	GFP	ES cells	11417	877/2291	490/93663	-324	-324	73.1723
SRX1688322	Ncaph2	ES cells	6783	318/2291	178/93663	-324	-324	73.0382
SRX20248717	Trim28	ES cells	15528	355/2291	199/93663	-324	-324	72.932
SRX8832797	Epitope tags	ES cells	14383	642/2291	361/93663	-324	-324	72.7061
SRX4167127	Gtf2b	ES cells	17277	1089/2291	613/93663	-324	-324	72.6291
SRX5850152	Yy1	ES cells	7860	302/2291	170/93663	-324	-324	72.6275
SRX5850112	Gabpa	ES cells	8659	549/2291	310/93663	-324	-324	72.4025
SRX1829032	Aebp2	ES cells	16161	840/2291	476/93663	-324	-324	72.1465
SRX5850158	Yy1	ES cells	12062	427/2291	242/93663	-324	-324	72.1366
SRX11417005	GFP	ES cells	12038	952/2291	541/93663	-324	-324	71.942
SRX868619	Zfp217	ES cells	13905	973/2291	555/93663	-324	-324	71.6742
SRX997153	Brd2	ES cells	13430	776/2291	443/93663	-324	-324	71.6145
SRX11717314	Dpy30	ES cells	9135	518/2291	296/93663	-324	-324	71.5453
SRX9195293	Epitope tags	ES cells	13335	974/2291	557/93663	-324	-324	71.4902
SRX4506777	Brd4	ES cells	12665	939/2291	537/93663	-324	-324	71.4882
SRX12735095	Med1	ES cells	15378	876/2291	501/93663	-324	-324	71.4841
SRX997155	Brd2	ES cells	17010	718/2291	412/93663	-324	-324	71.2476
SRX2830663	Setd1a	ES cells	10985	912/2291	524/93663	-324	-324	71.1552
SRX11221953	Taf12	ES cells	14300	881/2291	507/93663	-324	-324	71.0413
SRX1602657	Kmt2b	ES cells	11022	502/2291	289/93663	-324	-324	71.0148
SRX5850162	Yy1	ES cells	9687	342/2291	197/93663	-324	-324	70.9746
SRX19028415	0610010K14Rik	ES cells	14490	868/2291	500/93663	-324	-324	70.9729
SRX214081	Pou5f1	ES cells	14472	804/2291	464/93663	-324	-324	70.8404
SRX3202006	Tet1	ES cells	11801	381/2291	220/93663	-324	-324	70.802
SRX1690193	Nrf1	ES cells	4471	392/2291	227/93663	-324	-324	70.5998
SRX1670193	Med12	ES cells	6397	416/2291	241/93663	-324	-324	70.5699
SRX9450558	Otx2	ES cells	8338	556/2291	323/93663	-324	-324	70.3745
SRX5850114	Gabpa	ES cells	8985	499/2291	290/93663	-324	-324	70.347
SRX13440029	Maz	mESC derived neural cells	11731	699/2291	407/93663	-324	-324	70.2143
SRX7568551	Dendra2	ES cells	6500	575/2291	335/93663	-324	-324	70.1723
SRX5850113	Gabpa	ES cells	5305	271/2291	158/93663	-324	-324	70.1221
SRX8873444	Banp	ES cells	5033	348/2291	203/93663	-324	-324	70.0852
SRX9596422	Trim28	ES cells	23724	1084/2291	633/93663	-324	-324	70.0114
SRX8873446	Banp	ES cells	4515	312/2291	183/93663	-324	-324	69.7022
SRX518333	Nfya	ES cells	4293	325/2291	191/93663	-324	-324	69.5653
SRX4580516	Brd9	ES cells	8752	664/2291	391/93663	-324	-324	69.4279
SRX19838666	Kmt2b	ES cells	14788	739/2291	436/93663	-324	-324	69.2948
SRX5850118	Max	ES cells	13857	603/2291	356/93663	-324	-324	69.2485
SRX9101864	Kdm2b	ES cells	14050	594/2291	351/93663	-324	-324	69.1867
SRX9450261	Nelfe	ES cells	18697	1110/2291	657/93663	-324	-324	69.0718
SRX9450557	Otx2	ES cells	11509	727/2291	432/93663	-324	-324	68.8008
SRX16989255	Nanog	ES cells	4862	284/2291	169/93663	-324	-324	68.7028
SRX10560006	Med12	ES cells	14546	709/2291	422/93663	-324	-324	68.6873
SRX5251391	Smad2	Embryoid Bodies	9577	596/2291	356/93663	-324	-324	68.4446
SRX13476150	Maz	ES cells	7073	270/2291	162/93663	-324	-324	68.1384
SRX3644216	Top2b	ES cells	8135	399/2291	240/93663	-324	-324	67.968
SRX16989256	Nanog	ES cells	9015	551/2291	333/93663	-324	-324	67.6473
SRX6071871	Rnf2	ES cells	12567	796/2291	482/93663	-324	-324	67.5164
SRX11221954	Taf12	ES cells	17914	1073/2291	650/93663	-324	-324	67.4884
SRX104382	Ncaph2	ES cells	5237	281/2291	171/93663	-324	-324	67.182
SRX12124760	Yy1	ES cells	9729	345/2291	210/93663	-324	-324	67.165
SRX1602655	Kmt2b	ES cells	14713	854/2291	520/93663	-324	-324	67.1425
SRX9101865	Kdm2b	ES cells	15513	669/2291	408/93663	-324	-324	67.0361
SRX1690192	Nrf1	ES cells	6131	500/2291	305/93663	-324	-324	67.0213
SRX188819	Hcfc1	ES cells	14853	932/2291	569/93663	-324	-324	66.9648
SRX8330923	Utp6	ES cells	11737	643/2291	393/93663	-324	-324	66.89
SRX5850116	Max	ES cells	13644	553/2291	338/93663	-324	-324	66.8885
SRX1602651	Kmt2b	ES cells	16769	993/2291	610/93663	-324	-324	66.5522
SRX12798485	Brd4	ES cells	14667	801/2291	493/93663	-324	-324	66.4245
SRX6071849	Pcgf1	ES cells	12101	833/2291	514/93663	-324	-324	66.2559
SRX1670205	Med12	ES cells	10885	803/2291	499/93663	-324	-324	65.7897
SRX2245718	Brd4	ES cells	14586	780/2291	485/93663	-324	-324	65.75
SRX1602649	Kmt2b	ES cells	13787	811/2291	505/93663	-324	-324	65.6557
SRX1602656	Kmt2b	ES cells	17625	898/2291	560/93663	-324	-324	65.5588
SRX11221914	Taf12	ES cells	16897	1071/2291	668/93663	-324	-324	65.5475
SRX4167135	Med26	ES cells	18180	1091/2291	681/93663	-324	-324	65.4969
SRX13440032	Maz	ES cells	8816	466/2291	291/93663	-324	-324	65.469
SRX3202007	Tet1	ES cells	15082	478/2291	299/93663	-324	-324	65.3581
SRX11221903	Med4	ES cells	14023	909/2291	569/93663	-324	-324	65.3122
SRX11221952	Taf12	ES cells	20190	1174/2291	736/93663	-324	-324	65.2129
SRX11676997	Rpa1	ES cells	13034	883/2291	555/93663	-324	-324	65.0445
SRX11221902	Med4	ES cells	15157	993/2291	625/93663	-324	-324	64.9549
SRX3272101	Rybp	Embryoid Bodies	8641	440/2291	277/93663	-324	-324	64.9405
SRX9195302	Tbp	ES cells	14509	948/2291	597/93663	-324	-324	64.9198
SRX11221904	Med4	ES cells	14270	927/2291	584/93663	-324	-324	64.8948
SRX9195314	Tbp	ES cells	15177	957/2291	605/93663	-324	-324	64.6695
SRX2172627	Brd4	iPS cells	17970	801/2291	507/93663	-324	-324	64.5903
SRX5578684	Biotin	ES cells	9861	469/2291	297/93663	-324	-324	64.5594
SRX017058	Nelfa	ES cells	17251	1053/2291	667/93663	-324	-324	64.5425
SRX5850109	Gabpa	ES cells	6885	333/2291	211/93663	-324	-324	64.5215
SRX11221951	Taf12	ES cells	20126	1136/2291	720/93663	-324	-324	64.5043
SRX368297	Mcrs1	ES cells	11112	590/2291	374/93663	-324	-324	64.4946
SRX20248711	Trim28	ES cells	24357	588/2291	373/93663	-324	-324	64.4483
SRX9195311	Med1	ES cells	16297	1049/2291	666/93663	-324	-324	64.3938
SRX14059473	Arid2	ES cells	7009	355/2291	226/93663	-324	-324	64.2189
SRX2545592	Tet3	ES cells	14239	999/2291	636/93663	-324	-324	64.2172
SRX1670181	Med12	ES cells	8525	548/2291	349/93663	-324	-324	64.1945
SRX5784015	Brd4	ES cells	13646	339/2291	216/93663	-324	-324	64.1636
SRX368296	Mcrs1	ES cells	13998	750/2291	478/93663	-324	-324	64.147
SRX1741141	Fam60a	ES cells	10079	684/2291	436/93663	-324	-324	64.1376
SRX14976533	RFP	ES cells	8112	320/2291	204/93663	-324	-324	64.1302
SRX9195292	Epitope tags	ES cells	15753	1052/2291	671/93663	-324	-324	64.0968
SRX2793944	Cdk8	ES cells	6819	321/2291	205/93663	-324	-324	64.0168
SRX1670185	Med12	ES cells	7585	408/2291	261/93663	-324	-324	63.9091
SRX5578683	Biotin	ES cells	10717	483/2291	310/93663	-324	-324	63.6984
SRX482878	Rnf2	ES cells	12297	592/2291	383/93663	-324	-324	63.1926
SRX2831952	Kmt2d	ES cells	13918	714/2291	462/93663	-324	-324	63.1828
SRX1670209	Med12	ES cells	10390	649/2291	420/93663	-324	-324	63.174
SRX022697	Nipbl	ES cells	13693	791/2291	512/93663	-324	-324	63.1611
SRX3751911	Brd9	ES cells	9562	678/2291	440/93663	-324	-324	62.997
SRX9195313	Tbp	ES cells	15340	1011/2291	657/93663	-324	-324	62.9113
SRX11221958	Taf12	ES cells	22239	1056/2291	687/93663	-324	-324	62.842
SRX9195303	Tbp	ES cells	15660	1005/2291	655/93663	-324	-324	62.7289
SRX4167120	Med12	ES cells	20161	1039/2291	678/93663	-324	-324	62.6511
SRX10157271	Banp	mESC derived neural cells	16275	1145/2291	748/93663	-324	-324	62.5816
SRX2545595	Tet3	ES cells	13793	910/2291	595/93663	-324	-324	62.527
SRX12622651	Med14	ES cells	14703	1001/2291	655/93663	-324	-324	62.4792
SRX9411717	Kdm1a	EpiLC	16716	706/2291	462/93663	-324	-324	62.4749
SRX10978091	Banp	ES cells	10240	623/2291	409/93663	-324	-324	62.2741
SRX7568545	Dendra2	ES cells	11108	740/2291	486/93663	-324	-324	62.2499
SRX091892	Taf3	ES cells	24921	918/2291	605/93663	-324	-324	62.0341
SRX5850154	Yy1	ES cells	12728	409/2291	270/93663	-324	-324	61.9302
SRX482879	Rnf2	ES cells	16990	823/2291	544/93663	-324	-324	61.8506
SRX6071872	Rnf2	ES cells	15560	936/2291	622/93663	-324	-324	61.5217
SRX6784012	Chd2	ES cells	6243	322/2291	214/93663	-324	-324	61.5156
SRX5371690	Sp1	ES cells	12003	911/2291	606/93663	-324	-324	61.4595
SRX11417015	GFP	ES cells	14770	1080/2291	720/93663	-324	-324	61.3245
SRX5850110	Gabpa	ES cells	8404	387/2291	258/93663	-324	-324	61.3245
SRX12735094	Med1	ES cells	19221	1165/2291	780/93663	-324	-324	61.0625
SRX142127	Kat8	ES cells	12106	476/2291	321/93663	-324	-324	60.624
SRX9195286	Epitope tags	ES cells	16148	1081/2291	731/93663	-324	-324	60.4577
SRX19028406	Taf1	ES cells	16206	1199/2291	811/93663	-324	-324	60.4423
SRX1688323	Gtf3c1	ES cells	17657	943/2291	640/93663	-324	-324	60.2386
SRX6094550	Kdm2b	ES cells	7736	409/2291	278/93663	-324	-324	60.148
SRX2404537	Epitope tags	NSC-derived iPS cells	8167	450/2291	306/93663	-324	-324	60.1221
SRX9450257	Nelfe	ES cells	21342	1199/2291	817/93663	-324	-324	59.9985
SRX19028407	Taf1	ES cells	15381	1131/2291	772/93663	-324	-324	59.8947
SRX7175335	Yy1	ES cells	11267	284/2291	194/93663	-324	-324	59.8494
SRX4232697	Tet2	ES cells	15632	811/2291	554/93663	-324	-324	59.8486
SRX11221879	Med1	ES cells	18012	1106/2291	756/93663	-324	-324	59.8103
SRX2793941	Cdk8	ES cells	7557	340/2291	233/93663	-324	-324	59.6576
SRX6073530	Nipbl	P19	17075	634/2291	435/93663	-324	-324	59.5858
SRX5371688	Sp1	ES cells	12558	884/2291	607/93663	-324	-324	59.5397
SRX10978090	Banp	ES cells	12371	741/2291	509/93663	-324	-324	59.5173
SRX5371698	Sp1	ES cells	13909	1061/2291	729/93663	-324	-324	59.5019
SRX11221933	Taf12	ES cells	18205	1187/2291	816/93663	-324	-324	59.4708
SRX19028408	Taf1	ES cells	15779	1191/2291	819/93663	-324	-324	59.4526
SRX5850124	Max	ES cells	16070	641/2291	441/93663	-324	-324	59.4241
SRX7175336	Yy1	ES cells	10911	295/2291	203/93663	-324	-324	59.4113
SRX11386272	Kdm6a	ES cells	10873	534/2291	368/93663	-324	-324	59.3248
SRX6768043	Rnf2	ES cells	6615	289/2291	200/93663	-324	-324	59.076
SRX1688327	Gtf3c1	ES cells	17565	940/2291	651/93663	-324	-324	59.0323
SRX7568552	Dendra2	ES cells	11665	775/2291	537/93663	-324	-324	59.0025
SRX6768047	Rnf2	ES cells	7623	350/2291	243/93663	-324	-324	58.885
SRX4167114	Med1	ES cells	12740	643/2291	447/93663	-324	-324	58.8094
SRX378972	Sp1	mESCs, differentiated	14825	840/2291	584/93663	-324	-324	58.8043
SRX9858288	Ep300	ES cells	5767	365/2291	254/93663	-324	-324	58.7492
SRX997156	Brd2	ES cells	17657	767/2291	534/93663	-324	-324	58.7215
SRX871223	Tgif2	ES cells	5353	290/2291	202/93663	-324	-324	58.6934
SRX1688321	Ncaph2	ES cells	17152	1064/2291	743/93663	-324	-324	58.5458
SRX342720	Kmt2d	Embryoid Bodies	9952	486/2291	340/93663	-324	-324	58.4387
SRX1670201	Med12	ES cells	14175	985/2291	690/93663	-324	-324	58.362
SRX11237539	Yy1	ES cells	9075	395/2291	277/93663	-324	-324	58.2989
SRX12142045	Zic2	mESCs, differentiated	8158	429/2291	301/93663	-324	-324	58.2685
SRX2388540	Biotin	ES cells	10627	635/2291	446/93663	-324	-324	58.2079
SRX5401516	Yy1	ES cells	9902	452/2291	318/93663	-324	-324	58.1105
SRX6639876	Setd1a	ES cells	16404	985/2291	695/93663	-324	-324	57.9421
SRX11221957	Taf12	ES cells	24862	1142/2291	806/93663	-324	-324	57.9261
SRX4167119	Med12	ES cells	22804	1115/2291	787/93663	-324	-324	57.9219
SRX9187064	Epitope tags	ES cells	6700	507/2291	358/93663	-324	-324	57.8986
SRX12798080	Smarca4	ES cells	17301	681/2291	482/93663	-324	-324	57.7621
SRX1602648	Kmt2b	ES cells	17597	1020/2291	722/93663	-324	-324	57.7572
SRX16989257	Tbp	ES cells	16116	812/2291	575/93663	-324	-324	57.7339
SRX9195279	Epitope tags	ES cells	17168	1160/2291	822/93663	-324	-324	57.6938
SRX3202005	Tet1	ES cells	14587	434/2291	308/93663	-324	-324	57.6079
SRX7568544	Dendra2	ES cells	12810	838/2291	597/93663	-324	-324	57.3869
SRX9450295	Epitope tags	ES cells	9262	446/2291	318/93663	-324	-324	57.3391
SRX19028393	Epitope tags	ES cells	20615	1286/2291	917/93663	-324	-324	57.3343
SRX10978089	Banp	ES cells	13583	796/2291	570/93663	-324	-324	57.0928
SRX213792	Biotin	ES cells	11214	366/2291	264/93663	-324	-324	56.6787
SRX11221901	Med4	ES cells	18716	1225/2291	886/93663	-324	-324	56.5256
SRX5371702	Sp3	ES cells	14300	1078/2291	780/93663	-324	-324	56.5024
SRX16844895	GFP	ES cells	14801	1150/2291	833/93663	-324	-324	56.4411
SRX9195310	Med1	ES cells	21849	1241/2291	899/93663	-324	-324	56.4358
SRX3141818	Kdm6a	ES cells	5486	298/2291	216/93663	-324	-324	56.4034
SRX3176051	Epitope tags	ES cells	13267	543/2291	394/93663	-324	-324	56.3439
SRX2404538	Epitope tags	NSC-derived iPS cells	11960	720/2291	523/93663	-324	-324	56.2826
SRX16844897	GFP	ES cells	17198	1240/2291	901/93663	-324	-324	56.2652
SRX1519391	Biotin	ES cells	13065	682/2291	496/93663	-324	-324	56.2142
SRX20022554	Epitope tags	ES cells	17759	999/2291	727/93663	-324	-324	56.179
SRX825829	Runx1	mESC derived haemogenic endothelium	8209	309/2291	225/93663	-324	-324	56.146
SRX2388542	Biotin	ES cells	18151	925/2291	674/93663	-324	-324	56.108
SRX823725	Aff3	ES cells	29141	598/2291	436/93663	-324	-324	56.0735
SRX11221947	Taf1	ES cells	19018	1137/2291	829/93663	-324	-324	56.0724
SRX2404540	Epitope tags	NSC-derived iPS cells	10754	626/2291	457/93663	-324	-324	56.0017
SRX11417002	GFP	ES cells	17768	1140/2291	834/93663	-324	-324	55.8833
SRX16844923	GFP	ES cells	16688	1200/2291	882/93663	-324	-324	55.6232
SRX5371704	Sp3	ES cells	15080	1103/2291	811/93663	-324	-324	55.6029
SRX10157270	Banp	mESC derived neural cells	18394	1203/2291	885/93663	-324	-324	55.5732
SRX5850120	Max	ES cells	20786	836/2291	616/93663	-324	-324	55.4841
SRX4167117	Med12	ES cells	25593	1205/2291	890/93663	-324	-324	55.3529
SRX1602652	Kmt2b	ES cells	19945	1107/2291	819/93663	-324	-324	55.2595
SRX5247638	Zbtb11	ES cells	10511	369/2291	273/93663	-324	-324	55.2595
SRX3202004	Tet1	ES cells	24590	838/2291	620/93663	-324	-324	55.258
SRX9450256	Nelfe	ES cells	23272	1244/2291	921/93663	-324	-324	55.2209
SRX3751909	Brd9	ES cells	10746	702/2291	521/93663	-324	-324	55.0861
SRX2486173	Epitope tags	ES cells	18980	1267/2291	942/93663	-324	-324	54.9881
SRX2523722	Kdm2b	iPS cells	10843	418/2291	311/93663	-324	-324	54.9489
SRX5251398	Foxh1	Embryoid Bodies	21221	1187/2291	884/93663	-324	-324	54.8961
SRX14663239	GFP	ES cells	16996	887/2291	661/93663	-324	-324	54.8612
SRX5401517	Yy1	ES cells	10420	472/2291	352/93663	-324	-324	54.8204
SRX022695	Med1	ES cells	15346	882/2291	658/93663	-324	-324	54.8006
SRX12197081	Nrf1	mESC derived neural cells	14777	935/2291	699/93663	-324	-324	54.6862
SRX5247619	Zbtb11	ES cells	7422	329/2291	246/93663	-324	-324	54.6769
SRX16844894	GFP	ES cells	15900	1184/2291	888/93663	-324	-324	54.5107
SRX4506780	Brd4	ES cells	17197	1060/2291	796/93663	-324	-324	54.4422
SRX4167136	Med26	ES cells	22780	1215/2291	913/93663	-324	-324	54.4062
SRX994813	Nrf1	ES cells	8276	504/2291	379/93663	-324	-324	54.3669
SRX12622658	Med14	ES cells	11723	741/2291	558/93663	-324	-324	54.2909
SRX9450294	Epitope tags	ES cells	16943	835/2291	629/93663	-324	-324	54.2724
SRX19028409	Taf1	ES cells	18771	1323/2291	1000/93663	-324	-324	54.0882
SRX2609735	Med1	ES cells	16824	804/2291	609/93663	-324	-324	53.9736
SRX11221932	Taf12	ES cells	20590	1263/2291	957/93663	-324	-324	53.9553
SRX16844887	GFP	ES cells	16621	1158/2291	878/93663	-324	-324	53.9209
SRX11221940	Taf12	ES cells	19699	1287/2291	977/93663	-324	-324	53.8551
SRX9187065	Epitope tags	ES cells	8590	630/2291	479/93663	-324	-324	53.771
SRX1036420	Hexim1	ES cells	26603	1086/2291	826/93663	-324	-324	53.7518
SRX5088233	Pml	ES cells	18216	383/2291	292/93663	-324	-324	53.624
SRX5371705	Sp3	ES cells	15222	1120/2291	855/93663	-324	-324	53.5544
SRX5926388	Med1	ES cells	23727	1363/2291	1044/93663	-324	-324	53.3751
SRX5371703	Sp3	ES cells	14743	1118/2291	858/93663	-324	-324	53.2718
SRX4167134	Taf2	ES cells	26689	1085/2291	834/93663	-324	-324	53.1871
SRX7685626	Rad21	ES cells	15874	796/2291	612/93663	-324	-324	53.1746
SRX095342	Yy1	ES cells	14012	636/2291	489/93663	-324	-324	53.173
SRX191070	Epitope tags	ES cells	27745	908/2291	699/93663	-324	-324	53.107
SRX1659049	Ep300	mESC derived neural cells	16186	865/2291	666/93663	-324	-324	53.0988
SRX381478	Kdm2b	ES cells	14705	671/2291	518/93663	-324	-324	52.9585
SRX6768046	Rnf2	ES cells	10867	536/2291	414/93663	-324	-324	52.9307
SRX4301434	Smarca4	mESC derived cardiac cells	16273	811/2291	627/93663	-324	-324	52.8806
SRX191946	Gata4	ES cells	11028	513/2291	397/93663	-324	-324	52.8287
SRX13440028	Maz	ES cells	8216	364/2291	282/93663	-324	-324	52.771
SRX15652647	Nipbl	ES cells	12180	631/2291	489/93663	-324	-324	52.755
SRX5850126	Max	ES cells	22499	907/2291	703/93663	-324	-324	52.7467
SRX4232699	Tet2	ES cells	13571	415/2291	322/93663	-324	-324	52.6908
SRX12197087	Nrf1	mESC derived neural cells	15268	950/2291	738/93663	-324	-324	52.6272
SRX6078354	Crebbp	ES cells	20017	841/2291	654/93663	-324	-324	52.5728
SRX4167118	Med12	ES cells	27643	1229/2291	956/93663	-324	-324	52.5578
SRX14663240	GFP	ES cells	16378	836/2291	651/93663	-324	-324	52.5011
SRX2754633	Prdm15	ES cells	32153	960/2291	750/93663	-324	-324	52.3303
SRX1639485	Epop	ES cells	17091	752/2291	589/93663	-324	-324	52.197
SRX16844901	GFP	ES cells	18951	1208/2291	947/93663	-324	-324	52.1507
SRX9858289	Ep300	ES cells	6676	422/2291	331/93663	-324	-324	52.1228
SRX482054	Tdg	ES cells	18857	829/2291	651/93663	-324	-324	52.0615
SRX997159	Brd2	ES cells	20053	706/2291	555/93663	-324	-324	52.0061
SRX2441334	Klf4	ES cells	8184	426/2291	336/93663	-324	-324	51.8338
SRX1831954	Rnf2	ES cells	9578	443/2291	350/93663	-324	-324	51.7462
SRX2404536	Sin3a	NSC-derived iPS cells	14893	1068/2291	844/93663	-324	-324	51.7335
SRX13945545	Hif1a	ES cells	7679	512/2291	405/93663	-324	-324	51.6842
SRX029861	Tet1	ES cells	8592	350/2291	277/93663	-324	-324	51.6572
SRX15057957	Zic2	mESCs, differentiated	19158	903/2291	716/93663	-324	-324	51.5606
SRX5371696	Sp3	ES cells	17988	1169/2291	928/93663	-324	-324	51.5003
SRX3202002	Tet1	ES cells	26463	874/2291	695/93663	-324	-324	51.4126
SRX5850121	Max	ES cells	21536	874/2291	695/93663	-324	-324	51.4126
SRX3979862	Klf4	ES cells	8179	427/2291	340/93663	-324	-324	51.3443
SRX3202003	Tet1	ES cells	26177	889/2291	708/93663	-324	-324	51.3348
SRX4232696	Tet2	ES cells	22905	1077/2291	858/93663	-324	-324	51.3182
SRX5926389	Med1	ES cells	22162	1285/2291	1025/93663	-324	-324	51.2533
SRX4403324	Mbd3	ES cells	7054	307/2291	245/93663	-324	-324	51.2289
SRX381479	Kdm2b	ES cells	14655	637/2291	509/93663	-324	-324	51.164
SRX4397584	Pou5f1	iPS cells	27397	1243/2291	994/93663	-324	-324	51.1243
SRX5401532	Yy1	ES cells	10123	410/2291	328/93663	-324	-324	51.1038
SRX6094551	Kdm2b	ES cells	10384	491/2291	393/93663	-324	-324	51.0778
SRX9195312	Tbp	ES cells	23652	1170/2291	937/93663	-324	-324	51.0492
SRX191071	Epitope tags	ES cells	22540	745/2291	597/93663	-324	-324	51.0182
SRX6768042	Rnf2	ES cells	11446	575/2291	461/93663	-324	-324	50.9929
SRX319553	Kat5	ES cells	17969	632/2291	507/93663	-324	-324	50.9627
SRX13440030	Maz	mESC derived neural cells	18724	967/2291	777/93663	-324	-324	50.8802
SRX381487	Rnf2	ES cells	8930	352/2291	283/93663	-324	-324	50.851
SRX14210151	Ing5	ES cells	9525	491/2291	397/93663	-324	-324	50.5631
SRX5251386	Smad2	ES cells	12865	649/2291	525/93663	-324	-324	50.5392
SRX2831973	Kmt2d	ES cells	14532	676/2291	547/93663	-324	-324	50.5245
SRX16844912	GFP	ES cells	19306	1172/2291	950/93663	-324	-324	50.4367
SRX823724	Aff3	ES cells	19582	409/2291	332/93663	-324	-324	50.3649
SRX14210124	Setd1a	ES cells	11706	613/2291	498/93663	-324	-324	50.3239
SRX16844896	GFP	ES cells	19333	1295/2291	1053/93663	-324	-324	50.2787
SRX6094549	Kdm2b	ES cells	8362	414/2291	337/93663	-324	-324	50.2242
SRX128354	Zfp42	ES cells	29909	829/2291	676/93663	-324	-324	50.1361
SRX1080406	Smad2	Embryoid Bodies	12564	559/2291	456/93663	-324	-324	50.1176
SRX477545	Tgif1	ES cells	12479	557/2291	455/93663	-324	-324	50.048
SRX6078357	Ep300	ES cells	21055	847/2291	693/93663	-324	-324	49.9681
SRX9858291	Ep300	ES cells	12049	708/2291	580/93663	-324	-324	49.9055
SRX5371694	Sp3	ES cells	18741	1137/2291	932/93663	-324	-324	49.8755
SRX234787	Cbx3	iPS cells	11764	582/2291	478/93663	-324	-324	49.7781
SRX6071848	Pcgf1	ES cells	14297	838/2291	689/93663	-324	-324	49.7242
SRX1831956	Rnf2	ES cells	9815	475/2291	391/93663	-324	-324	49.6661
SRX2498435	Epitope tags	ES cells	22876	1114/2291	917/93663	-324	-324	49.666
SRX1089849	Tbp	ES cells	13436	755/2291	624/93663	-324	-324	49.4658
SRX16844919	GFP	ES cells	18655	1253/2291	1036/93663	-324	-324	49.4464
SRX6071847	Pcgf1	ES cells	16862	1057/2291	874/93663	-324	-324	49.4432
SRX11221949	Taf12	ES cells	25698	1390/2291	1153/93663	-324	-324	49.2866
SRX381480	Kdm2b	ES cells	15362	633/2291	526/93663	-324	-324	49.1995
SRX2441337	Klf4	ES cells	14543	726/2291	604/93663	-324	-324	49.1408
SRX16844903	GFP	ES cells	19656	1261/2291	1050/93663	-324	-324	49.0986
SRX1080403	Smad2	Embryoid Bodies	10303	435/2291	363/93663	-324	-324	48.992
SRX5401533	Yy1	ES cells	11219	464/2291	388/93663	-324	-324	48.891
SRX18520802	Tbp	ES cells	17893	713/2291	597/93663	-324	-324	48.8268
SRX994814	Nrf1	ES cells	9419	518/2291	434/93663	-324	-324	48.7959
SRX1036419	Ddx21	ES cells	26932	1268/2291	1064/93663	-324	-324	48.7215
SRX214080	Pou5f1	ES cells	24450	855/2291	718/93663	-324	-324	48.6838
SRX9195317	Tbp	ES cells	25924	1206/2291	1014/93663	-324	-324	48.6242
SRX5817868	Zic2	ES cells	6314	310/2291	261/93663	-324	-324	48.5584
SRX5850115	Max	ES cells	22556	850/2291	717/93663	-324	-324	48.4666
SRX6639878	Setd1a	ES cells	13427	666/2291	562/93663	-324	-324	48.4486
SRX19028410	Taf3	ES cells	24923	1331/2291	1124/93663	-324	-324	48.4122
SRX657145	Med1	iPS cells	12261	313/2291	265/93663	-324	-324	48.2882
SRX039347	Tet1	ES cells	19830	870/2291	737/93663	-324	-324	48.2608
SRX16844906	GFP	ES cells	20181	1209/2291	1029/93663	-324	-324	48.0346
SRX13439134	Tbp	ES cells	19026	1290/2291	1099/93663	-324	-324	47.9883
SRX13439135	Tbp	ES cells	18784	1269/2291	1082/93663	-324	-324	47.9488
SRX2831998	Kmt2d	ES cells	17235	844/2291	722/93663	-324	-324	47.7912
SRX214079	Pou5f1	ES cells	10056	382/2291	328/93663	-324	-324	47.6138
SRX16844900	GFP	ES cells	20658	1236/2291	1063/93663	-324	-324	47.5366
SRX17793746	Myc	ES cells	5478	302/2291	260/93663	-324	-324	47.4872
SRX4167113	Med1	ES cells	24120	1074/2291	927/93663	-324	-324	47.3661
SRX2762152	Setd1a	ES cells	17865	1176/2291	1017/93663	-324	-324	47.2748
SRX186547	Rnf2	ES cells	19989	694/2291	601/93663	-324	-324	47.2093
SRX9410192	GFP	ES cells	14913	606/2291	525/93663	-324	-324	47.1907
SRX10157269	Banp	ES cells	23367	1215/2291	1053/93663	-324	-324	47.1727
SRX14663244	GFP	ES cells	12040	495/2291	429/93663	-324	-324	47.1727
SRX5817882	Zic2	ES cells	10600	495/2291	429/93663	-324	-324	47.1727
SRX2441333	Klf4	ES cells	11394	475/2291	412/93663	-324	-324	47.1346
SRX4338269	Suz12	ES cells	15280	620/2291	538/93663	-324	-324	47.1143
SRX5247633	Epitope tags	ES cells	10734	310/2291	269/93663	-324	-324	47.1143
SRX2754632	Prdm15	ES cells	33212	961/2291	835/93663	-324	-324	47.0522
SRX6768045	Rnf2	ES cells	7976	353/2291	307/93663	-324	-324	47.0088
SRX6071845	Pcgf1	ES cells	11071	563/2291	490/93663	-324	-324	46.9738
SRX16844884	GFP	ES cells	18871	1212/2291	1057/93663	-324	-324	46.8782
SRX5850122	Max	ES cells	27424	992/2291	866/93663	-324	-324	46.8314
SRX1280434	Nrf1	ES cells	11785	587/2291	513/93663	-324	-324	46.7804
SRX11237501	Smc1a	ES cells	13272	461/2291	403/93663	-324	-324	46.7669
SRX022692	Med12	ES cells	18862	960/2291	841/93663	-324	-324	46.6679
SRX19028394	Epitope tags	ES cells	25953	1452/2291	1274/93663	-324	-324	46.5951
SRX2762150	Kmt2b	ES cells	22300	1281/2291	1126/93663	-324	-324	46.5108
SRX6071873	Rnf2	ES cells	22201	1283/2291	1128/93663	-324	-324	46.5008
SRX14663242	GFP	ES cells	17625	839/2291	738/93663	-324	-324	46.4781
SRX4232701	Epitope tags	ES cells	19359	707/2291	622/93663	-324	-324	46.4699
SRX5251397	Foxh1	Embryoid Bodies	25926	1369/2291	1205/93663	-324	-324	46.4472
SRX12798079	Smarca4	ES cells	14817	650/2291	573/93663	-324	-324	46.3769
SRX5926393	Med24	ES cells	24738	1292/2291	1140/93663	-324	-324	46.3341
SRX3979861	Klf4	ES cells	11952	497/2291	439/93663	-324	-324	46.2844
SRX11417001	GFP	ES cells	21386	1266/2291	1119/93663	-324	-324	46.2537
SRX11221878	Med1	ES cells	26882	1398/2291	1236/93663	-324	-324	46.2415
SRX5401530	Yy1	ES cells	13491	553/2291	489/93663	-324	-324	46.2338
SRX236482	Cdk8	ES cells	11820	587/2291	520/93663	-324	-324	46.1506
SRX1831955	Rnf2	ES cells	8059	351/2291	311/93663	-324	-324	46.1413
SRX9450267	Chd4	ES cells	9332	397/2291	353/93663	-324	-324	45.9789
SRX13439086	Brd3	ES cells	17065	1080/2291	962/93663	-324	-324	45.8978
SRX4159294	Epitope tags	F9	9642	302/2291	270/93663	-324	-324	45.7284
SRX19028412	Taf3	ES cells	26793	1399/2291	1251/93663	-324	-324	45.7197
SRX7175340	Yy1	ES cells	14235	408/2291	366/93663	-324	-324	45.5745
SRX5817867	Zic2	ES cells	7522	351/2291	315/93663	-324	-324	45.5554
SRX16844924	GFP	ES cells	20184	1260/2291	1134/93663	-324	-324	45.4256
SRX11221941	Taf12	ES cells	23155	1367/2291	1238/93663	-324	-324	45.143
SRX14210093	Setd1a	ES cells	9183	437/2291	397/93663	-324	-324	45.0022
SRX1280435	Nrf1	ES cells	15879	790/2291	718/93663	-324	-324	44.9827
SRX2415040	Mettl3	ES cells	28304	1174/2291	1068/93663	-324	-324	44.9407
SRX6768044	Rnf2	ES cells	11057	515/2291	469/93663	-324	-324	44.8929
SRX12142050	Zic2	mESCs, differentiated	7647	322/2291	294/93663	-324	-324	44.7766
SRX319555	Nr0b1	ES cells	13599	546/2291	499/93663	-324	-324	44.7337
SRX8042397	Rybp	ES cells	9388	385/2291	352/93663	-324	-324	44.7158
SRX9411720	Kmt2d	EpiLC	20661	554/2291	507/93663	-324	-324	44.673
SRX6071844	Pcgf1	ES cells	8748	415/2291	380/93663	-324	-324	44.6486
SRX14595108	Fev	Embryoid Bodies	12589	577/2291	529/93663	-324	-324	44.5926
SRX16844920	GFP	ES cells	21218	1299/2291	1194/93663	-324	-324	44.4783
SRX10157267	Banp	ES cells	28841	1349/2291	1241/93663	-324	-324	44.4409
SRX5251393	Smad3	Embryoid Bodies	27285	1300/2291	1197/93663	-324	-324	44.4009
SRX19028411	Taf3	ES cells	28282	1431/2291	1322/93663	-324	-324	44.2539
SRX4167115	Med1	ES cells	27402	1167/2291	1080/93663	-324	-324	44.1764
SRX17793736	Myc	ES cells	5883	329/2291	305/93663	-324	-324	44.1
SRX5850123	Max	ES cells	26475	1052/2291	976/93663	-324	-324	44.0665
SRX5817870	Zic2	ES cells	7753	376/2291	349/93663	-324	-324	44.0459
SRX977380	Pou5f1	iPS cells	23740	960/2291	892/93663	-324	-324	43.9997
SRX4578585	Smad2	ES cells	24672	1162/2291	1081/93663	-324	-324	43.9464
SRX16844918	GFP	ES cells	20412	1309/2291	1219/93663	-324	-324	43.9015
SRX11221948	Taf12	ES cells	29078	1488/2291	1387/93663	-324	-324	43.8601
SRX15652646	Nipbl	ES cells	14759	635/2291	593/93663	-324	-324	43.7786
SRX14595109	Fev	Embryoid Bodies	9363	374/2291	350/93663	-324	-324	43.6864
SRX14672120	Zc3h4	ES cells	7708	393/2291	368/93663	-324	-324	43.6604
SRX11221877	Med1	ES cells	28527	1432/2291	1341/93663	-324	-324	43.6573
SRX19028413	Taf3	ES cells	28633	1445/2291	1355/93663	-324	-324	43.5985
SRX14210168	Setd1a	ES cells	7609	354/2291	332/93663	-324	-324	43.5921
SRX8736786	Kmt2d	mESC derived neural cells	12903	476/2291	448/93663	-324	-324	43.4382
SRX5850125	Max	ES cells	29495	1076/2291	1016/93663	-324	-324	43.2974
SRX11221946	Taf1	ES cells	25243	1281/2291	1213/93663	-324	-324	43.1749
SRX330668	Ezh2	ES cells	12455	420/2291	398/93663	-324	-324	43.1429
SRX16844886	GFP	ES cells	20801	1286/2291	1223/93663	-324	-324	42.989
SRX6033283	RAF1	ES cells	18224	623/2291	593/93663	-324	-324	42.9513
SRX11237533	Yy1	ES cells	19981	806/2291	770/93663	-324	-324	42.7944
SRX5926392	Med24	ES cells	26520	1332/2291	1274/93663	-324	-324	42.7443
SRX5817869	Zic2	ES cells	11917	540/2291	517/93663	-324	-324	42.7018
SRX186548	Kdm2b	ES cells	33772	1044/2291	1002/93663	-324	-324	42.5967
SRX1089848	Tbp	ES cells	17289	812/2291	780/93663	-324	-324	42.5603
SRX2831999	Kmt2d	ES cells	19188	765/2291	735/93663	-324	-324	42.5517
SRX9637872	Foxk2	ES cells	6039	340/2291	327/93663	-324	-324	42.5083
SRX2754629	Prdm15	ES cells	30862	1009/2291	971/93663	-324	-324	42.483
SRX8120165	O-GlcNAc	ES cells	22424	1098/2291	1058/93663	-324	-324	42.4287
SRX16844905	GFP	ES cells	23168	1334/2291	1287/93663	-324	-324	42.376
SRX6768016	Rnf2	ES cells	10532	426/2291	411/93663	-324	-324	42.3751
SRX5371695	Sp3	ES cells	25693	1311/2291	1267/93663	-324	-324	42.3028
SRX5360258	Isl1	mESC derived cardiac cells	59070	512/2291	495/93663	-324	-324	42.2871
DRX013314	Kdm1a	EpiSC	19216	485/2291	469/93663	-324	-324	42.2778
SRX10280239	Etv2	Embryoid Bodies	7887	302/2291	293/93663	-324	-324	42.1388
SRX9450272	Sin3a	ES cells	20152	1288/2291	1252/93663	-324	-324	42.0586
SRX2353878	Rnf2	ES cells	12394	624/2291	608/93663	-324	-324	41.9589
SRX657153	Med1	ES cells	14447	803/2291	783/93663	-324	-324	41.9273
SRX14210153	Setd1a	ES cells	8149	372/2291	363/93663	-324	-324	41.8966
SRX12197069	Nrf1	ES cells	6622	455/2291	444/93663	-324	-324	41.8959
SRX16844916	GFP	ES cells	20298	1258/2291	1231/93663	-324	-324	41.7797
SRX7175339	Yy1	ES cells	14509	392/2291	384/93663	-324	-324	41.7348
SRX16844921	GFP	ES cells	21803	1306/2291	1280/93663	-324	-324	41.7135
SRX5027349	Pcgf6	ES cells	10282	403/2291	395/93663	-324	-324	41.711
SRX4232700	Epitope tags	ES cells	35180	1143/2291	1121/93663	-324	-324	41.6854
SRX9450551	Otx2	ES cells	23929	1047/2291	1028/93663	-324	-324	41.6386
SRX5401531	Yy1	ES cells	15450	615/2291	604/93663	-324	-324	41.6276
SRX5247637	Zbtb11	ES cells	13735	409/2291	403/93663	-324	-324	41.4917
SRX6813450	Epitope tags	ES cells	19227	778/2291	768/93663	-324	-324	41.4154
SRX6071846	Pcgf1	ES cells	8770	401/2291	397/93663	-324	-324	41.2949
SRX6639877	Setd1a	ES cells	23271	1113/2291	1102/93663	-324	-324	41.2911
SRX6768041	Rnf2	ES cells	9714	418/2291	414/93663	-324	-324	41.278
SRX8736743	Kmt2d	mESC derived neural cells	12015	428/2291	424/93663	-324	-324	41.2687
SRX14672121	Zc3h4	ES cells	5578	323/2291	320/93663	-324	-324	41.2663
SRX9410191	GFP	ES cells	18782	686/2291	681/93663	-324	-324	41.1832
SRX5926390	Med1	ES cells	28122	1266/2291	1259/93663	-324	-324	41.1103
SRX4397573	Pou5f1	iPS cells	21133	540/2291	539/93663	-324	-324	40.9589
SRX13439087	Brd3	ES cells	19249	1116/2291	1116/93663	-324	-324	40.883
SRX149638	Brd4	ES cells	15026	760/2291	760/93663	-324	-324	40.883
SRX2404539	Epitope tags	NSC-derived iPS cells	12684	502/2291	502/93663	-324	-324	40.883
SRX5371693	Sp3	ES cells	24132	1293/2291	1294/93663	-324	-324	40.8514
SRX8120164	O-GlcNAc	ES cells	28207	1295/2291	1297/93663	-324	-324	40.82
SRX16844893	GFP	ES cells	21710	1290/2291	1293/93663	-324	-324	40.7882
SRX14663243	GFP	ES cells	17369	697/2291	700/93663	-324	-324	40.7078
SRX5850119	Max	ES cells	28071	1062/2291	1068/93663	-324	-324	40.6533
SRX5926391	Med1	ES cells	28019	1265/2291	1273/93663	-324	-324	40.6261
SRX16844904	GFP	ES cells	24953	1375/2291	1385/93663	-324	-324	40.5878
SRX16844885	GFP	ES cells	22265	1316/2291	1327/93663	-324	-324	40.5441
SRX873858	GFP	ES cells	10711	445/2291	450/93663	-324	-324	40.4288
SRX2754630	Prdm15	ES cells	33324	1032/2291	1046/93663	-324	-324	40.3358
SRX2752336	Kmt2c	ES cells	12792	464/2291	471/93663	-324	-324	40.2754
SRX19951063	Epitope tags	ES cells	13411	469/2291	477/93663	-324	-324	40.1974
SRX9411718	Kdm1a	EpiLC	35607	971/2291	989/93663	-324	-324	40.1389
SRX18050973	Zc3h4	ES cells	8988	489/2291	499/93663	-324	-324	40.0637
SRX1831951	Rnf2	ES cells	13171	537/2291	548/93663	-324	-324	40.0624
SRX5926394	Med24	ES cells	29167	1331/2291	1359/93663	-324	-324	40.0407
SRX5251387	Smad3	ES cells	23018	1027/2291	1049/93663	-324	-324	40.0256
SRX4178813	Dendra2	ES cells	28276	1277/2291	1306/93663	-324	-324	39.9752
SRX14663241	GFP	ES cells	24410	1094/2291	1119/93663	-324	-324	39.9696
SRX477546	Hdac1	ES cells	8465	350/2291	359/93663	-324	-324	39.8581
SRX14663246	GFP	ES cells	15178	544/2291	558/93663	-324	-324	39.8573
SRX5247632	Epitope tags	ES cells	19281	342/2291	351/93663	-324	-324	39.8347
SRX468970	Klf5	ES cells	17044	596/2291	612/93663	-324	-324	39.8142
SRX11221944	Taf1	ES cells	28542	1404/2291	1446/93663	-324	-324	39.6955
SRX16844911	GFP	ES cells	23177	1300/2291	1339/93663	-324	-324	39.6923
SRX12124816	Rnf2	PGCLC	16124	787/2291	812/93663	-324	-324	39.6243
SRX5850117	Max	ES cells	28974	1009/2291	1042/93663	-324	-324	39.5883
SRX1831953	Rnf2	ES cells	9794	367/2291	380/93663	-324	-324	39.4844
SRX11237521	Yy1	ES cells	24396	928/2291	961/93663	-324	-324	39.4791
SRX015778	Jarid2	ES cells	15811	623/2291	646/93663	-324	-324	39.4274
SRX5247639	Zbtb11	ES cells	21676	867/2291	901/93663	-324	-324	39.3403
SRX16989239	Pou5f1	ES cells	9334	325/2291	338/93663	-324	-324	39.3106
SRX657147	Med1	iPS cells	32177	1117/2291	1162/93663	-324	-324	39.2998
SRX4167116	Med1	ES cells	34697	1259/2291	1311/93663	-324	-324	39.2614
SRX803859	Rad23b	ES cells	28615	1109/2291	1156/93663	-324	-324	39.2208
SRX9195301	Tbp	ES cells	32397	1365/2291	1424/93663	-324	-324	39.1891
SRX13439089	Brd3	ES cells	19212	1033/2291	1079/93663	-324	-324	39.1401
SRX9450273	Sin3a	ES cells	22014	1361/2291	1424/93663	-324	-324	39.0743
SRX11237515	Yy1	ES cells	20266	681/2291	715/93663	-324	-324	38.9389
SRX2609737	Med1	ES cells	34642	1231/2291	1293/93663	-324	-324	38.9227
SRX16844925	GFP	ES cells	23870	1314/2291	1382/93663	-324	-324	38.8714
SRX1158302	Rnf2	ES cells	20014	811/2291	853/93663	-324	-324	38.87
SRX9450271	Sin3a	ES cells	23761	1416/2291	1491/93663	-324	-324	38.8265
SRX5371697	Sp3	ES cells	26565	1305/2291	1377/93663	-324	-324	38.7453
SRX9450270	Sin3a	ES cells	22759	1413/2291	1497/93663	-324	-324	38.589
SRX2437563	Ep300	ES cells	8119	329/2291	349/93663	-324	-324	38.5402
SRX20288174	Kdm1a	ES cells	20043	833/2291	884/93663	-324	-324	38.5244
SRX16844892	GFP	ES cells	23410	1331/2291	1415/93663	-324	-324	38.456
SRX214084	Pou5f1	ES cells	11630	363/2291	386/93663	-324	-324	38.447
SRX13439136	Tbp	ES cells	21834	1319/2291	1404/93663	-324	-324	38.4079
SRX5388086	Trim28	ES cells	14700	413/2291	440/93663	-324	-324	38.3743
SRX9187041	Epitope tags	ES cells	20583	941/2291	1003/93663	-324	-324	38.3559
SRX1997144	Ep300	Embryoid Bodies	36610	1154/2291	1236/93663	-324	-324	38.1707
SRX11123488	Nanog	ES cells	12306	516/2291	553/93663	-324	-324	38.1476
SRX213793	Kdm4c	ES cells	46801	1370/2291	1475/93663	-324	-324	37.9727
SRX13439088	Brd3	ES cells	19722	1018/2291	1097/93663	-324	-324	37.9388
SRX4232702	Epitope tags	ES cells	21663	463/2291	500/93663	-324	-324	37.8577
SRX13332960	Kmt2d	ES cells	29215	1058/2291	1143/93663	-324	-324	37.8427
SRX6033282	RAF1	ES cells	16508	520/2291	562/93663	-324	-324	37.8277
SRX16815351	Pou5f1	ES cells	29818	989/2291	1069/93663	-324	-324	37.8235
SRX11237497	Yy1	ES cells	24273	889/2291	961/93663	-324	-324	37.82
SRX14663245	GFP	ES cells	12692	442/2291	478/93663	-324	-324	37.804
SRX368311	Msl2	mESC derived neural cells	13539	315/2291	341/93663	-324	-324	37.7658
SRX13439137	Tbp	ES cells	21947	1337/2291	1456/93663	-324	-324	37.5416
SRX9450552	Otx2	ES cells	26902	1140/2291	1243/93663	-324	-324	37.4953
SRX11416998	GFP	ES cells	27426	1311/2291	1430/93663	-324	-324	37.4809
SRX10157268	Banp	ES cells	36792	1490/2291	1627/93663	-324	-324	37.4405
DRX013326	Kdm1a	EpiSC	42811	895/2291	978/93663	-324	-324	37.4134
SRX994811	Nrf1	ES cells	17535	637/2291	698/93663	-324	-324	37.3101
SRX5926395	Med24	ES cells	31742	1383/2291	1516/93663	-324	-324	37.2963
SRX16844902	GFP	ES cells	25669	1367/2291	1501/93663	-324	-324	37.2332
SRX214068	Pou5f1	F9	27055	705/2291	775/93663	-324	-324	37.1904
SRX9858286	Trim28	ES cells	59088	904/2291	994/93663	-324	-324	37.1813
SRX404069	Utf1	ES cells	39810	979/2291	1077/93663	-324	-324	37.1629
SRX330667	Ezh2	ES cells	19694	622/2291	685/93663	-324	-324	37.123
SRX4506782	Smarca4	ES cells	13144	592/2291	652/93663	-324	-324	37.1208
SRX482877	Rnf2	ES cells	14835	556/2291	613/93663	-324	-324	37.0815
SRX11237527	Yy1	ES cells	23266	872/2291	965/93663	-324	-324	36.943
SRX9187061	Epitope tags	ES cells	23273	1052/2291	1171/93663	-324	-324	36.7284
SRX6033284	RAF1	ES cells	15454	440/2291	491/93663	-324	-324	36.6365
SRX468969	Klf4	ES cells	20883	653/2291	729/93663	-324	-324	36.6209
SRX4506784	Smarca4	ES cells	13026	584/2291	653/93663	-324	-324	36.5631
SRX186550	Rnf2	ES cells	14145	401/2291	449/93663	-324	-324	36.5125
SRX5054326	GFP	ES cells	10757	384/2291	430/93663	-324	-324	36.5095
SRX11416999	GFP	ES cells	26567	1315/2291	1476/93663	-324	-324	36.4236
SRX6071868	Rnf2	ES cells	11899	507/2291	570/93663	-324	-324	36.3644
SRX4178805	Dendra2	ES cells	28457	1328/2291	1497/93663	-324	-324	36.2676
SRX11237509	Yy1	ES cells	27543	1001/2291	1132/93663	-324	-324	36.1519
SRX803857	Rad23b	ES cells	38535	1315/2291	1489/93663	-324	-324	36.1056
SRX213830	Pou5f1	ES cells	14865	499/2291	566/93663	-324	-324	36.0435
SRX11677013	Ints3	ES cells	29649	1522/2291	1728/93663	-324	-324	36.0092
SRX381484	Rnf2	ES cells	10719	347/2291	395/93663	-324	-324	35.915
SRX2236913	Sox2	ES cells	9285	323/2291	368/93663	-324	-324	35.8837
SRX1158300	Rnf2	ES cells	19627	651/2291	747/93663	-324	-324	35.629
SRX2498434	Epitope tags	ES cells	29917	1268/2291	1457/93663	-324	-324	35.5797
SRX191943	Gata4	mESC derived mesodermal cells	28765	1125/2291	1301/93663	-324	-324	35.3523
SRX6768017	Rnf2	ES cells	10036	393/2291	455/93663	-324	-324	35.3121
SRX2762170	Kmt2b	ES cells	28756	1333/2291	1544/93663	-324	-324	35.296
SRX14672122	Zc3h4	ES cells	10161	504/2291	584/93663	-324	-324	35.2826
SRX16844890	GFP	ES cells	24718	1301/2291	1508/93663	-324	-324	35.2711
SRX4394645	Dppa4	iPS cells	19521	413/2291	479/93663	-324	-324	35.2499
SRX6768040	Rnf2	ES cells	15226	663/2291	769/93663	-324	-324	35.2476
SRX5088234	Smc1a	ES cells	32788	539/2291	626/93663	-324	-324	35.2012
SRX11221945	Taf1	ES cells	31881	1467/2291	1710/93663	-324	-324	35.0733
SRX15057955	Zic3	mESCs, differentiated	11220	347/2291	405/93663	-324	-324	35.0282
SRX10157266	Banp	ES cells	43908	1604/2291	1875/93663	-324	-324	34.9741
SRX994810	Nrf1	ES cells	14117	506/2291	592/93663	-324	-324	34.9439
SRX3200445	Fli1	mESC derived haemogenic endothelium	10920	329/2291	385/93663	-324	-324	34.9364
SRX6768029	Pcgf1	ES cells	9947	339/2291	397/93663	-324	-324	34.9102
SRX6879009	Pou5f1	ES cells	22440	649/2291	763/93663	-324	-324	34.7747
SRX11123489	Nanog	ES cells	14770	574/2291	675/93663	-324	-324	34.7657
SRX9858290	Ep300	ES cells	19780	874/2291	1030/93663	-324	-324	34.691
SRX3101083	Smad4	Embryoid Bodies	11273	425/2291	502/93663	-324	-324	34.6121
SRX214067	Pou5f1	F9	24055	728/2291	860/93663	-324	-324	34.608
SRX5251392	Smad2	Embryoid Bodies	26149	934/2291	1104/93663	-324	-324	34.5876
SRX16844917	GFP	ES cells	25158	1368/2291	1619/93663	-324	-324	34.5448
SRX5251396	Smad4	Embryoid Bodies	11294	424/2291	502/93663	-324	-324	34.5307
SRX16844891	GFP	ES cells	26317	1336/2291	1582/93663	-324	-324	34.5257
SRX11677014	Ints3	ES cells	30642	1513/2291	1793/93663	-324	-324	34.4986
SRX236483	Cdk9	ES cells	10339	398/2291	472/93663	-324	-324	34.4734
SRX11237503	Yy1	ES cells	27265	960/2291	1139/93663	-324	-324	34.458
SRX248287	Nanog	Embryoid Bodies	55205	1141/2291	1354/93663	-324	-324	34.4516
SRX6071870	Rnf2	ES cells	14648	642/2291	763/93663	-324	-324	34.3996
SRX3753618	Nipbl	ES cells	31269	1115/2291	1326/93663	-324	-324	34.3775
SRX11416997	GFP	ES cells	30866	1372/2291	1632/93663	-324	-324	34.3698
SRX4397583	Pou5f1	iPS cells	42241	1511/2291	1802/93663	-324	-324	34.2809
SRX9450268	Sin3a	ES cells	28745	1496/2291	1786/93663	-324	-324	34.2447
SRX1845479	Epitope tags	ES cells	49778	1069/2291	1278/93663	-324	-324	34.1971
SRX499126	Ep300	EpiLC	32582	1234/2291	1476/93663	-324	-324	34.18
SRX16844909	GFP	ES cells	27438	1418/2291	1698/93663	-324	-324	34.1414
SRX16844889	GFP	ES cells	26200	1330/2291	1593/93663	-324	-324	34.1333
SRX2646179	Epitope tags	ES cells	49748	1069/2291	1284/93663	-324	-324	34.0373
SRX499140	Pou5f1	ES cells	15009	478/2291	576/93663	-324	-324	33.9272
SRX1080393	Tcf3	Embryoid Bodies	38236	1249/2291	1508/93663	-324	-324	33.8613
SRX11677011	Ints3	ES cells	30641	1537/2291	1856/93663	-324	-324	33.8563
SRX1158299	Rnf2	ES cells	32363	1254/2291	1515/93663	-324	-324	33.8398
SRX9446566	Pou2f1	mESC derived mesodermal cells	45582	1282/2291	1549/93663	-324	-324	33.836
SRX11221955	Taf12	ES cells	40309	1454/2291	1757/93663	-324	-324	33.8326
SRX7176630	Ssrp1	ES cells	14035	445/2291	540/93663	-324	-324	33.6906
SRX16989242	Pou5f1	ES cells	15147	471/2291	572/93663	-324	-324	33.6642
SRX4338268	Suz12	ES cells	12261	387/2291	471/93663	-324	-324	33.5918
SRX047141	Kdm1a	ES cells	42904	1439/2291	1752/93663	-324	-324	33.5791
SRX027353	Ep300	ES cells	15887	555/2291	679/93663	-324	-324	33.4169
SRX2762172	Setd1a	ES cells	27354	1282/2291	1570/93663	-324	-324	33.3835
SRX825830	Runx1	mESC derived haematopoietic progenitor	26899	821/2291	1006/93663	-324	-324	33.3648
SRX2873907	Yy1	ES cells	27279	983/2291	1207/93663	-324	-324	33.2958
SRX373167	GFP	ES cells	30878	1327/2291	1630/93663	-324	-324	33.2833
SRX334975	Klf5	ES cells	29203	854/2291	1049/93663	-324	-324	33.2832
SRX9858284	Trim28	ES cells	36585	327/2291	402/93663	-324	-324	33.2556
SRX6071869	Rnf2	ES cells	9775	373/2291	459/93663	-324	-324	33.223
SRX191944	Gata4	mESC derived mesodermal cells	33346	1351/2291	1665/93663	-324	-324	33.1729
SRX14595111	Fev	Embryoid Bodies	27572	703/2291	868/93663	-324	-324	33.1115
SRX13332923	Dnttip1	ES cells	22309	963/2291	1191/93663	-324	-324	33.0565
SRX16844910	GFP	ES cells	28121	1413/2291	1749/93663	-324	-324	33.029
SRX657149	Med1	iPS cells	39659	1407/2291	1743/93663	-324	-324	33.002
SRX6706336	Rnf2	ES cells	11116	441/2291	547/93663	-324	-324	32.9605
SRX4394631	Dppa4	ES cells	23940	466/2291	581/93663	-324	-324	32.7909
SRX8003647	Epitope tags	ES cells	13846	437/2291	547/93663	-324	-324	32.6616
SRX5578661	Biotin	ES cells	16268	450/2291	564/93663	-324	-324	32.6194
SRX7653549	Pou5f1	ES cells	17503	487/2291	611/93663	-324	-324	32.586
SRX16989243	Pou5f1	ES cells	13748	421/2291	529/93663	-324	-324	32.5364
SRX2423276	GFP	ES cells	13037	493/2291	620/93663	-324	-324	32.5086
SRX11677007	Tbp	ES cells	34223	1626/2291	2047/93663	-324	-324	32.4747
SRX3730212	Ep300	ES cells	18650	522/2291	658/93663	-324	-324	32.433
SRX15831061	Suz12	ES cells	10582	384/2291	486/93663	-324	-324	32.3026
SRX5247634	Epitope tags	ES cells	27486	859/2291	1090/93663	-324	-324	32.2188
SRX15057958	Zic3	mESCs, differentiated	22577	688/2291	874/93663	-324	-324	32.1825
SRX9858294	Pou5f1	ES cells	11571	463/2291	592/93663	-324	-324	31.9744
SRX9450269	Sin3a	ES cells	28436	1493/2291	1909/93663	-324	-324	31.974
SRX2498439	Epitope tags	ES cells	34802	1224/2291	1566/93663	-324	-324	31.9545
SRX5054330	GFP	ES cells	20330	664/2291	854/93663	-324	-324	31.7873
SRX977371	Epitope tags	iPSC intermediates	38013	1099/2291	1417/93663	-324	-324	31.7081
SRX9858295	Pou5f1	ES cells	8746	341/2291	441/93663	-324	-324	31.6125
SRX11677010	Tbp	ES cells	37320	1671/2291	2169/93663	-324	-324	31.4963
SRX2762151	Kmt2d	ES cells	35248	1396/2291	1813/93663	-324	-324	31.4797
SRX390399	Tcf12	mESC derived endodermal cells	41501	1144/2291	1488/93663	-324	-324	31.4316
SRX16844888	GFP	ES cells	27747	1342/2291	1746/93663	-324	-324	31.4233
SRX11677012	Ints3	ES cells	33780	1581/2291	2059/93663	-324	-324	31.392
SRX3200442	Fli1	mESC derived haemogenic endothelium	16219	499/2291	651/93663	-324	-324	31.3374
SRX8556272	Kmt2b	ES cells	33199	1463/2291	1912/93663	-324	-324	31.2824
SRX13439109	Taf3	ES cells	25874	1452/2291	1901/93663	-324	-324	31.2268
SRX16844908	GFP	ES cells	30710	1460/2291	1916/93663	-324	-324	31.153
SRX3898502	Brd4	ES cells	36178	1406/2291	1846/93663	-324	-324	31.1384
SRX13439131	Taf3	ES cells	26450	1453/2291	1912/93663	-324	-324	31.0685
SRX390391	Smad2	ES cells	31569	939/2291	1236/93663	-324	-324	31.0592
SRX11677009	Tbp	ES cells	37830	1667/2291	2201/93663	-324	-324	30.9641
SRX12124849	Rnf2	PGCLC	13400	486/2291	643/93663	-324	-324	30.9007
SRX5251394	Smad3	Embryoid Bodies	40412	1480/2291	1959/93663	-324	-324	30.8866
SRX13332925	Dnttip1	ES cells	25621	1074/2291	1425/93663	-324	-324	30.8129
SRX11677016	Ssrp1	ES cells	38289	1408/2291	1877/93663	-324	-324	30.6677
SRX13439133	Taf3	ES cells	27781	1361/2291	1819/93663	-324	-324	30.5892
SRX2437564	Ep300	ES cells	18805	668/2291	895/93663	-324	-324	30.5138
SRX2498437	Epitope tags	ES cells	37759	1285/2291	1727/93663	-324	-324	30.4196
SRX5374730	Pou5f1	ES cells	11446	368/2291	495/93663	-324	-324	30.3938
SRX11677008	Tbp	ES cells	38404	1668/2291	2245/93663	-324	-324	30.3754
SRX13439093	Brd4	ES cells	26376	1127/2291	1521/93663	-324	-324	30.2927
SRX977379	Pou5f1	iPSC intermediates	43915	1257/2291	1701/93663	-324	-324	30.2116
SRX13439090	Brd4	ES cells	27060	1217/2291	1653/93663	-324	-324	30.0996
SRX194542	Ep300	ES cells	14447	394/2291	537/93663	-324	-324	29.9961
SRX1158297	Rnf2	ES cells	20233	631/2291	861/93663	-324	-324	29.9619
SRX214083	Pou5f1	ES cells	14824	405/2291	553/93663	-324	-324	29.9415
SRX12124754	Rnf2	ES cells	14097	553/2291	756/93663	-324	-324	29.9052
SRX1280438	Nrf1	ES cells	26630	661/2291	905/93663	-324	-324	29.8604
SRX6768014	Rnf2	ES cells	13243	534/2291	732/93663	-324	-324	29.8245
SRX13439091	Brd4	ES cells	26541	1198/2291	1649/93663	-324	-324	29.7016
SRX9446558	Pou5f1	ES cells	55349	1301/2291	1792/93663	-324	-324	29.6813
SRX499128	Pou5f1	EpiLC	34323	1134/2291	1562/93663	-324	-324	29.6808
SRX2831996	Kdm1a	ES cells	35224	1121/2291	1557/93663	-324	-324	29.4347
SRX147771	Epitope tags	ES cells	50547	1433/2291	1991/93663	-324	-324	29.4251
SRX248284	Tbx3	ES cells	35316	538/2291	749/93663	-324	-324	29.3659
SRX214082	Pou5f1	ES cells	38246	1022/2291	1432/93663	-324	-324	29.1777
SRX6768015	Rnf2	ES cells	10265	386/2291	541/93663	-324	-324	29.1698
SRX994817	Nrf1	ES cells	37952	1194/2291	1675/93663	-324	-324	29.1429
SRX14210166	Ing5	ES cells	24941	984/2291	1387/93663	-324	-324	29.0042
SRX4403317	Sin3a	ES cells	41413	1660/2291	2356/93663	-324	-324	28.8055
SRX12124753	Rnf2	ES cells	14461	564/2291	801/93663	-324	-324	28.7865
SRX062994	Ep300	ES cells	41370	1147/2291	1630/93663	-324	-324	28.7686
SRX5251389	Foxh1	ES cells	47947	1732/2291	2469/93663	-324	-324	28.6794
SRX143842	Ep300	ES cells	41387	1145/2291	1636/93663	-324	-324	28.6131
SRX213829	Nanog	ES cells	14451	380/2291	545/93663	-324	-324	28.5056
SRX4580513	Smarca4	ES cells	32083	1178/2291	1697/93663	-324	-324	28.3796
SRX6827270	Pou5f1	ES cells	20094	441/2291	636/93663	-324	-324	28.3481
SRX027354	Ep300	ES cells	16065	480/2291	693/93663	-324	-324	28.3172
SRX3581840	Epitope tags	ES cells	24054	427/2291	617/93663	-324	-324	28.2934
SRX5054328	GFP	ES cells	18055	570/2291	825/93663	-324	-324	28.2465
SRX8844232	Olig2	EpiSC	25279	750/2291	1088/93663	-324	-324	28.1822
SRX977378	Pou5f1	iPSC intermediates	43230	1117/2291	1621/93663	-324	-324	28.1717
SRX12142046	Zic3	mESCs, differentiated	19904	560/2291	814/93663	-324	-324	28.1259
SRX11221956	Taf12	ES cells	50420	1501/2291	2188/93663	-324	-324	28.0463
SRX6461382	Epitope tags	ES cells	24141	425/2291	620/93663	-324	-324	28.0247
SRX499113	Ep300	ES cells	16037	516/2291	753/93663	-324	-324	28.0155
SRX5054318	Epitope tags	ES cells	14360	416/2291	608/93663	-324	-324	27.9726
SRX1704889	Nanog	ES cells	48047	1387/2291	2029/93663	-324	-324	27.9471
SRX8642890	Rad21	ES cells	38632	1163/2291	1704/93663	-324	-324	27.9031
SRX2539827	Kdm5c	ES cells	28654	951/2291	1394/93663	-324	-324	27.8908
SRX7205310	Rnf2	ES cells	32470	1106/2291	1624/93663	-324	-324	27.8427
SRX499114	Pou5f1	ES cells	45760	1382/2291	2037/93663	-324	-324	27.737
SRX5600783	Setd1a	ES cells	41755	1444/2291	2131/93663	-324	-324	27.703
SRX12260419	Ctcf	mESC derived erythroid cells	44318	1228/2291	1816/93663	-324	-324	27.6456
SRX17066025	Ctcf	mESC derived erythroid cells	44318	1228/2291	1816/93663	-324	-324	27.6456
SRX11677017	Ssrp1	ES cells	40527	1514/2291	2240/93663	-324	-324	27.6325
SRX1080398	Tcf3	ES cells	45699	1310/2291	1939/93663	-324	-324	27.6208
SRX4054005	Ascl1	Embryoid Bodies	16702	428/2291	634/93663	-324	-324	27.5993
SRX2539828	Kdm5c	ES cells	26195	820/2291	1216/93663	-324	-324	27.5691
SRX214078	Pou5f1	ES cells	36037	952/2291	1413/93663	-324	-324	27.5447
SRX2270102	Ep300	ES cells	44572	1390/2291	2065/93663	-324	-324	27.5193
SRX470061	Epitope tags	ES cells	17929	562/2291	836/93663	-324	-324	27.4836
SRX9410195	GFP	ES cells	33039	809/2291	1206/93663	-324	-324	27.4248
SRX3038041	Pou5f1	iPS cells	22091	552/2291	823/93663	-324	-324	27.4209
SRX8736761	Kmt2d	ES cells	26637	871/2291	1299/93663	-324	-324	27.4127
SRX7175345	Ep300	ES cells	13986	353/2291	527/93663	-324	-324	27.3846
SRX977370	Epitope tags	iPSC intermediates	47870	1291/2291	1932/93663	-324	-324	27.3188
SRX6879007	Pbx1	ES cells	23453	514/2291	770/93663	-324	-324	27.2907
SRX15057960	Zic3	mESCs, differentiated	14082	368/2291	552/93663	-324	-324	27.2553
SRX9446564	Pou2f1	mESC derived mesodermal cells	54375	1381/2291	2077/93663	-324	-324	27.1832
SRX9410194	GFP	ES cells	29685	708/2291	1065/93663	-324	-324	27.1786
SRX6706332	Rnf2	ES cells	11679	383/2291	577/93663	-324	-324	27.1373
SRX2415029	Mettl3	ES cells	32457	376/2291	567/93663	-324	-324	27.1111
SRX8120163	O-GlcNAc	ES cells	47751	1559/2291	2357/93663	-324	-324	27.0414
SRX2752335	Kmt2c	ES cells	40637	1177/2291	1785/93663	-324	-324	26.9576
SRX14595112	Fev	Embryoid Bodies	42690	1015/2291	1541/93663	-324	-324	26.9281
SRX11525495	Sumo1	ES cells	57337	833/2291	1267/93663	-324	-324	26.8789
SRX5600784	Setd1a	ES cells	42484	1204/2291	1832/93663	-324	-324	26.8685
SRX1280437	Nrf1	ES cells	22425	505/2291	770/93663	-324	-324	26.8129
SRX16736245	Kmt2d	ES cells	13734	402/2291	613/93663	-324	-324	26.8107
SRX8844233	Olig2	EpiSC	31575	920/2291	1405/93663	-324	-324	26.7704
SRX4594913	Sox2	ES cells	14420	401/2291	613/93663	-324	-324	26.744
SRX7205308	Rnf2	ES cells	21096	725/2291	1111/93663	-324	-324	26.6788
SRX13439092	Brd4	ES cells	31232	1258/2291	1931/93663	-324	-324	26.6343
SRX6706333	Rnf2	ES cells	11338	383/2291	590/93663	-324	-324	26.5393
SRX13439102	Smc1a	ES cells	28626	843/2291	1304/93663	-324	-324	26.4297
SRX2415026	Mettl3	ES cells	62310	591/2291	915/93663	-324	-324	26.4064
SRX17024519	Smc1a	ES cells	18529	565/2291	875/93663	-324	-324	26.3988
SRX1158296	Rnf2	ES cells	13327	405/2291	631/93663	-324	-324	26.2403
SRX3898501	Brd4	ES cells	51110	1692/2291	2640/93663	-324	-324	26.2023
SRX11677015	Ssrp1	ES cells	42389	1483/2291	2321/93663	-324	-324	26.1222
SRX7546912	Zic3	ES cells	14843	410/2291	644/93663	-324	-324	26.028
SRX11525496	Sumo1	ES cells	60303	991/2291	1557/93663	-324	-324	26.0212
SRX390396	Smad2	mESC derived endodermal cells	58377	1251/2291	1969/93663	-324	-324	25.9749
SRX9446557	Pou2f1	ES cells	55699	1431/2291	2253/93663	-324	-324	25.967
SRX7205309	Rnf2	ES cells	38090	1241/2291	1954/93663	-324	-324	25.9651
SRX11525492	Sumo1	ES cells	61647	1036/2291	1632/93663	-324	-324	25.9527
SRX2609732	Ino80	ES cells	44947	781/2291	1232/93663	-324	-324	25.9169
SRX5858856	Smc1a	ES cells	44106	900/2291	1424/93663	-324	-324	25.839
SRX5023731	Pou5f1	ES cells	13286	357/2291	565/93663	-324	-324	25.8323
SRX470058	Epitope tags	ES cells	41346	989/2291	1566/93663	-324	-324	25.8195
SRX2762171	Kmt2d	ES cells	42283	1446/2291	2291/93663	-324	-324	25.8039
SRX13439104	Smc1a	ES cells	28218	772/2291	1226/93663	-324	-324	25.7436
SRX7205307	Rnf2	ES cells	25605	830/2291	1323/93663	-324	-324	25.6485
SRX17066027	Ctcf	mESC derived erythroid cells	51167	1208/2291	1928/93663	-324	-324	25.6155
SRX12124785	Rnf2	EpiLC	11622	391/2291	627/93663	-324	-324	25.4948
SRX4887838	Hdac3	ES cells	15267	408/2291	655/93663	-324	-324	25.4661
SRX5578682	Biotin	ES cells	22321	548/2291	880/93663	-324	-324	25.459
SRX994816	Nrf1	ES cells	52877	1426/2291	2293/93663	-324	-324	25.4249
SRX4506772	Arid1a	ES cells	13552	375/2291	603/93663	-324	-324	25.4248
SRX11525491	Sumo1	ES cells	61257	865/2291	1394/93663	-324	-324	25.3686
SRX554633	Suz12	ES cells	18381	397/2291	643/93663	-324	-324	25.2419
SRX14812517	Trim24	ES cells	41881	717/2291	1162/93663	-324	-324	25.2264
SRX466434	Epitope tags	ES cells	18256	478/2291	775/93663	-324	-324	25.2156
SRX385377	GFP	ES cells	43330	1539/2291	2496/93663	-324	-324	25.2079
SRX13439132	Taf3	ES cells	33354	1482/2291	2415/93663	-324	-324	25.0885
SRX11221882	Esrrb	ES cells	52888	1599/2291	2610/93663	-324	-324	25.0467
SRX3038040	Pou5f1	iPS cells	31150	659/2291	1076/93663	-324	-324	25.039
SRX11677018	Ssrp1	ES cells	44983	1553/2291	2538/93663	-324	-324	25.0163
SRX18040252	Sox2	ES cells	14963	476/2291	778/93663	-324	-324	25.0133
SRX5242837	Rnf2	ES cells	15288	558/2291	913/93663	-324	-324	24.9866
SRX6827273	Klf4	ES cells	84631	1699/2291	2780/93663	-324	-324	24.9857
SRX16815352	Pou5f1	ES cells	56263	1276/2291	2089/93663	-324	-324	24.9721
SRX499143	Otx2	ES cells	40201	870/2291	1431/93663	-324	-324	24.8555
SRX16101712	Smarca4	ES cells	16469	428/2291	704/93663	-324	-324	24.855
SRX11221884	Esrrb	ES cells	52146	1589/2291	2624/93663	-324	-324	24.7573
SRX499141	Otx2	ES cells	24322	579/2291	959/93663	-324	-324	24.6833
SRX476210	Zfp57	ES cells	70815	656/2291	1087/93663	-324	-324	24.6727
SRX470060	Epitope tags	ES cells	22556	559/2291	928/93663	-324	-324	24.6267
SRX2894852	Ino80	ES cells	45825	790/2291	1315/93663	-324	-324	24.5609
SRX499112	Ep300	ES cells	29471	835/2291	1390/93663	-324	-324	24.5592
SRX499125	Ep300	EpiLC	19155	541/2291	902/93663	-324	-324	24.5207
SRX9101846	Ezh2	ES cells	17747	425/2291	709/93663	-324	-324	24.5067
SRX12124786	Rnf2	EpiLC	11604	371/2291	619/93663	-324	-324	24.5034
SRX213808	Nanog	ES cells	23652	594/2291	1005/93663	-324	-324	24.1637
SRX10437500	Ctcf	ES cells	57263	1507/2291	2550/93663	-324	-324	24.1611
SRX13439111	Ctcf	ES cells	28818	845/2291	1434/93663	-324	-324	24.0908
SRX5054320	Epitope tags	ES cells	19349	522/2291	886/93663	-324	-324	24.0868
SRX8736760	Kmt2d	Embryoid Bodies	16397	385/2291	659/93663	-324	-324	23.8846
SRX10560008	Smc1a	ES cells	20646	546/2291	938/93663	-324	-324	23.7976
SRX1670203	Rad21	ES cells	34918	1007/2291	1732/93663	-324	-324	23.7697
SRX466437	Epitope tags	ES cells	19347	436/2291	755/93663	-324	-324	23.6093
SRX248286	Nanog	ES cells	121325	1492/2291	2588/93663	-324	-324	23.5693
SRX5023733	Pou5f1	ES cells	17385	429/2291	746/93663	-324	-324	23.5105
SRX1670183	Rad21	ES cells	30414	891/2291	1550/93663	-324	-324	23.5011
SRX13228158	Sox2	ES cells	25138	723/2291	1258/93663	-324	-324	23.4964
SRX5054322	Epitope tags	ES cells	17979	450/2291	784/93663	-324	-324	23.466
SRX6032073	Sox2	ES cells	21190	505/2291	882/93663	-324	-324	23.4081
SRX6032061	Sox2	ES cells	22124	539/2291	949/93663	-324	-324	23.2202
SRX6032074	Sox2	ES cells	27338	654/2291	1153/93663	-324	-324	23.1895
SRX499115	Pou5f1	ES cells	39317	974/2291	1719/93663	-324	-324	23.1647
SRX5054321	Epitope tags	ES cells	19852	508/2291	899/93663	-324	-324	23.1019
SRX3038042	Pou5f1	iPS cells	24558	525/2291	930/93663	-324	-324	23.0791
SRX977376	Pou5f1	iPSC intermediates	43190	735/2291	1307/93663	-324	-324	22.9908
SRX10560009	Smc1a	ES cells	56028	1300/2291	2315/93663	-324	-324	22.9581
SRX175894	GFP	ES cells	22593	534/2291	951/93663	-324	-324	22.9564
SRX8003643	Epitope tags	ES cells	18541	480/2291	855/93663	-324	-324	22.9519
SRX554628	Suz12	ES cells	22677	487/2291	869/93663	-324	-324	22.9114
SRX5023744	Sox2	ES cells	20516	435/2291	778/93663	-324	-324	22.8588
SRX8736759	Kmt2d	ES cells	35126	918/2291	1642/93663	-324	-324	22.8566
SRX16815353	Pou5f1	ES cells	77488	1210/2291	2175/93663	-324	-324	22.7441
SRX4017943	Pou5f1	ES cells	27241	434/2291	782/93663	-324	-324	22.6896
SRX9295986	Epitope tags	ES cells	32305	770/2291	1388/93663	-324	-324	22.6801
SRX5600782	Setd1a	ES cells	54948	1581/2291	2864/93663	-324	-324	22.5685
SRX390394	Tcf12	ES cells	91580	1651/2291	3037/93663	-324	-324	22.2252
SRX4054008	Neurog2	mESCs, differentiated	55259	1150/2291	2137/93663	-324	-324	22.0007
SRX16815354	Pou5f1	ES cells	71174	1078/2291	2006/93663	-324	-324	21.97
SRX977367	Epitope tags	iPSC intermediates	56508	974/2291	1819/93663	-324	-324	21.8912
SRX1706938	Neurog2	mESCs, differentiated	55311	1148/2291	2146/93663	-324	-324	21.8703
SRX10560010	Smc1a	ES cells	59627	1200/2291	2247/93663	-324	-324	21.8334
SRX977375	Pou5f1	iPSC intermediates	50801	894/2291	1676/93663	-324	-324	21.8075
SRX3430144	Rad21	ES cells	25698	665/2291	1253/93663	-324	-324	21.6977
SRX1670207	Rad21	ES cells	42038	1129/2291	2132/93663	-324	-324	21.6496
SRX13439112	Ctcf	ES cells	29643	787/2291	1488/93663	-324	-324	21.6229
SRX15888975	Epitope tags	ES cells	47539	1074/2291	2038/93663	-324	-324	21.5448
SRX977377	Pou5f1	iPSC intermediates	57245	978/2291	1861/93663	-324	-324	21.485
SRX1540623	Zfp281	ES cells	84878	1365/2291	2600/93663	-324	-324	21.4636
SRX8003646	Epitope tags	ES cells	33160	899/2291	1717/93663	-324	-324	21.4058
SRX236476	Pou5f1	ES cells	24884	598/2291	1146/93663	-324	-324	21.3334
SRX109459	Hoxb4	Embryoid Bodies	29561	520/2291	998/93663	-324	-324	21.3018
SRX13439114	Ctcf	ES cells	41452	1102/2291	2119/93663	-324	-324	21.2615
SRX8517933	Sox2	ES cells	18685	393/2291	757/93663	-324	-324	21.2246
SRX2752334	Kmt2c	ES cells	37206	853/2291	1649/93663	-324	-324	21.1481
SRX18040248	Sox2	ES cells	33217	893/2291	1731/93663	-324	-324	21.091
SRX5242841	Rnf2	ES cells	23122	867/2291	1681/93663	-324	-324	21.086
SRX6032062	Sox2	ES cells	30643	707/2291	1373/93663	-324	-324	21.0519
SRX390392	Tcf12	ES cells	83236	1505/2291	2923/93663	-324	-324	21.0499
SRX3200453	Runx1	mESC derived haemogenic endothelium	34135	622/2291	1212/93663	-324	-324	20.9812
SRX499130	Otx2	EpiLC	40288	944/2291	1843/93663	-324	-324	20.9406
SRX13228088	Sox2	ES cells	38985	1033/2291	2025/93663	-324	-324	20.8554
SRX18040244	Sox2	ES cells	32632	892/2291	1761/93663	-324	-324	20.7085
SRX15888979	Epitope tags	ES cells	50528	1082/2291	2151/93663	-324	-324	20.5651
SRX8003645	Epitope tags	ES cells	31524	837/2291	1671/93663	-324	-324	20.4782
SRX11221881	Esrrb	ES cells	54558	1237/2291	2479/93663	-324	-324	20.4003
SRX16815350	Pou5f1	ES cells	92358	1686/2291	3380/93663	-324	-324	20.3931
SRX1410919	Zic2	EpiSC	59689	1059/2291	2126/93663	-324	-324	20.3646
SRX13439103	Smc1a	ES cells	19112	428/2291	861/93663	-324	-324	20.3228
SRX11221883	Esrrb	ES cells	63697	1395/2291	2814/93663	-324	-324	20.2672
SRX16101713	Smarca4	ES cells	17472	401/2291	813/93663	-324	-324	20.1649
SRX11600045	Nanog	ES cells	30547	640/2291	1300/93663	-324	-324	20.127
SRX10710596	Suz12	ES cells	17262	397/2291	808/93663	-324	-324	20.0873
SRX1410924	Zic2	EpiSC	64470	1115/2291	2273/93663	-324	-324	20.0548
SRX14601076	Rad21	ES cells	24821	651/2291	1329/93663	-324	-324	20.0262
SRX12204131	Ctcf	ES cells	19996	457/2291	933/93663	-324	-324	20.0252
SRX16815349	Pou5f1	ES cells	94578	1694/2291	3463/93663	-324	-324	19.9988
SRX2894853	Dr1	ES cells	72537	1258/2291	2573/93663	-324	-324	19.9887
SRX8994336	Nanog	ES cells	45845	945/2291	1944/93663	-324	-324	19.8737
SRX6879008	Zic3	ES cells	72006	1175/2291	2435/93663	-324	-324	19.7279
SRX6768032	Rnf2	ES cells	17767	537/2291	1114/93663	-324	-324	19.7075
SRX8994345	Pou5f1	ES cells	21981	389/2291	808/93663	-324	-324	19.6825
SRX6032072	Sox2	ES cells	35219	732/2291	1521/93663	-324	-324	19.6755
SRX5023730	Pou5f1	ES cells	23778	444/2291	930/93663	-324	-324	19.5183
SRX10710598	Suz12	ES cells	28709	719/2291	1510/93663	-324	-324	19.4668
SRX13332957	Kdm6a	ES cells	48059	1106/2291	2324/93663	-324	-324	19.4564
SRX390397	Tcf12	mESC derived endodermal cells	78682	1240/2291	2606/93663	-324	-324	19.4532
SRX6032060	Sox2	ES cells	35998	756/2291	1591/93663	-324	-324	19.4265
SRX8517971	Sox2	ES cells	22602	411/2291	866/93663	-324	-324	19.4029
SRX4887839	Hdac3	ES cells	19330	425/2291	896/93663	-324	-324	19.3921
SRX6032059	Sox2	ES cells	36634	776/2291	1636/93663	-324	-324	19.3919
SRX8994337	Nanog	ES cells	53429	1084/2291	2294/93663	-324	-324	19.3187
SRX5729492	Twist1	Embryoid Bodies	38790	780/2291	1651/93663	-324	-324	19.3148
SRX4054006	Ascl1	Embryoid Bodies	21804	450/2291	953/93663	-324	-324	19.3047
SRX1670187	Rad21	ES cells	31587	695/2291	1474/93663	-324	-324	19.2766
SRX9295987	Epitope tags	ES cells	38869	840/2291	1783/93663	-324	-324	19.2606
SRX10710586	Suz12	ES cells	20296	407/2291	866/93663	-324	-324	19.2141
SRX4980239	Hoxb1	ES cells	46452	572/2291	1218/93663	-324	-324	19.1996
SRX14812518	Trim24	ES cells	39072	492/2291	1050/93663	-324	-324	19.1566
SRX3200452	Runx1	mESC derived haemogenic endothelium	53575	994/2291	2123/93663	-324	-324	19.1416
SRX5023725	Nanog	ES cells	24875	449/2291	962/93663	-324	-324	19.0816
SRX11600046	Nanog	ES cells	40297	813/2291	1743/93663	-324	-324	19.0694
SRX499127	Pou5f1	EpiLC	28313	560/2291	1203/93663	-324	-324	19.0312
SRX15888976	Epitope tags	ES cells	49324	972/2291	2090/93663	-324	-324	19.0135
SRX9486379	Sox2	ES cells	107308	1761/2291	3804/93663	-324	-324	18.9261
SRX1704897	Nanog	ES cells	43706	851/2291	1841/93663	-324	-324	18.8981
SRX404068	Utf1	ES cells	69455	1557/2291	3377/93663	-324	-324	18.8495
SRX9195324	Nanog	ES cells	26776	513/2291	1118/93663	-324	-324	18.7594
SRX977369	Epitope tags	iPSC intermediates	72094	1237/2291	2705/93663	-324	-324	18.6959
SRX8642887	Rad21	ES cells	38433	803/2291	1757/93663	-324	-324	18.6847
SRX6831870	Rad21	ES cells	55799	1203/2291	2634/93663	-324	-324	18.6721
SRX4054013	Epitope tags	Embryoid Bodies	46921	888/2291	1950/93663	-324	-324	18.6175
SRX8517930	Sox2	ES cells	21908	396/2291	870/93663	-324	-324	18.6088
SRX14601075	Rad21	ES cells	24617	585/2291	1287/93663	-324	-324	18.5832
SRX9195308	Nanog	ES cells	23515	495/2291	1096/93663	-324	-324	18.4645
SRX13332951	Kdm6a	ES cells	43029	943/2291	2090/93663	-324	-324	18.4463
SRX7423745	Mtf2	ES cells	16858	507/2291	1124/93663	-324	-324	18.441
SRX6032071	Sox2	ES cells	31594	621/2291	1378/93663	-324	-324	18.4241
SRX10560011	Smc1a	ES cells	88555	1472/2291	3270/93663	-324	-324	18.4036
SRX4054012	Epitope tags	Embryoid Bodies	26371	489/2291	1092/93663	-324	-324	18.3075
SRX6831871	Rad21	ES cells	42492	902/2291	2031/93663	-324	-324	18.1568
SRX16038359	Esrrb	ES cells	22305	402/2291	906/93663	-324	-324	18.1401
SRX9195325	Nanog	ES cells	30556	534/2291	1206/93663	-324	-324	18.1024
SRX13332919	Dnttip1	ES cells	47966	1230/2291	2792/93663	-324	-324	18.0108
SRX1670195	Rad21	ES cells	37695	796/2291	1816/93663	-324	-324	17.9201
SRX499117	Otx2	ES cells	25986	598/2291	1368/93663	-324	-324	17.8714
SRX7653548	Nanog	ES cells	97287	1654/2291	3794/93663	-324	-324	17.823
SRX5023740	Sox2	ES cells	26160	432/2291	997/93663	-324	-324	17.7146
SRX2752337	Kmt2c	ES cells	67677	1475/2291	3408/93663	-324	-324	17.6944
SRX13439130	Smc1a	ES cells	21205	459/2291	1062/93663	-324	-324	17.6698
SRX4594915	Sox2	ES cells	25885	459/2291	1063/93663	-324	-324	17.6532
SRX977368	Epitope tags	iPSC intermediates	84222	1338/2291	3118/93663	-324	-324	17.5438
SRX4054029	Ebf2	mESCs, differentiated	41995	682/2291	1596/93663	-324	-324	17.4701
SRX6003869	Tbp	ES cells	76475	1459/2291	3431/93663	-324	-324	17.3851
SRX1670191	Rad21	ES cells	45075	899/2291	2124/93663	-324	-324	17.3041
SRX16736244	Kmt2d	ES cells	34906	651/2291	1544/93663	-324	-324	17.2376
SRX11600050	Nanog	ES cells	56925	993/2291	2358/93663	-324	-324	17.2166
SRX13332921	Dnttip1	ES cells	53854	1296/2291	3084/93663	-324	-324	17.1804
SRX6768033	Rnf2	ES cells	16715	443/2291	1058/93663	-324	-324	17.1183
SRX7653539	Nanog	ES cells	25210	409/2291	978/93663	-324	-324	17.0973
SRX4054010	Neurog2	mESCs, differentiated	32109	541/2291	1300/93663	-324	-324	17.0136
SRX10710594	Suz12	ES cells	21175	513/2291	1238/93663	-324	-324	16.941
SRX175893	GFP	ES cells	94168	1205/2291	2913/93663	-324	-324	16.9118
SRX499129	Otx2	EpiLC	39809	725/2291	1759/93663	-324	-324	16.8506
SRX15888978	Epitope tags	ES cells	82105	1457/2291	3573/93663	-324	-324	16.6713
SRX8517951	Sox2	ES cells	29111	468/2291	1150/93663	-324	-324	16.6376
SRX4054019	Ebf2	Embryoid Bodies	32571	526/2291	1299/93663	-324	-324	16.5546
SRX9486381	Sox2	ES cells	127425	1878/2291	4645/93663	-324	-324	16.5292
SRX9345864	Tfcp2l1	ES cells	38299	583/2291	1442/93663	-324	-324	16.529
SRX6003867	Tbp	ES cells	76153	1473/2291	3656/93663	-324	-324	16.4717
SRX9195309	Nanog	ES cells	28784	537/2291	1333/93663	-324	-324	16.4698
SRX6003871	Tbp	ES cells	74263	1377/2291	3419/93663	-324	-324	16.4656
SRX11600049	Nanog	ES cells	61303	1034/2291	2575/93663	-324	-324	16.4167
SRX977374	Pou5f1	iPSC intermediates	51277	583/2291	1459/93663	-324	-324	16.3364
SRX8517922	Nanog	ES cells	26333	445/2291	1117/93663	-324	-324	16.2873
SRX8994335	Nanog	ES cells	42600	713/2291	1790/93663	-324	-324	16.2847
SRX6032051	Esrrb	ES cells	34128	556/2291	1397/93663	-324	-324	16.2713
SRX6032052	Esrrb	ES cells	38120	628/2291	1582/93663	-324	-324	16.2292
SRX8517925	Nanog	ES cells	24594	427/2291	1078/93663	-324	-324	16.1939
SRX6032054	Esrrb	ES cells	31039	498/2291	1261/93663	-324	-324	16.1457
SRX2752333	Kmt2c	ES cells	71010	1375/2291	3503/93663	-324	-324	16.0474
SRX15888984	Epitope tags	ES cells	46287	790/2291	2014/93663	-324	-324	16.0365
SRX9295984	Epitope tags	ES cells	62373	1137/2291	2900/93663	-324	-324	16.029
SRX977366	Epitope tags	iPSC intermediates	78207	946/2291	2416/93663	-324	-324	16.008
SRX5729491	Twist1	Embryoid Bodies	47377	758/2291	1940/93663	-324	-324	15.9739
SRX1670211	Rad21	ES cells	34052	622/2291	1596/93663	-324	-324	15.9331
SRX8844235	Olig2	EpiSC	69664	1249/2291	3211/93663	-324	-324	15.9025
SRX15888985	Epitope tags	ES cells	48910	833/2291	2148/93663	-324	-324	15.8545
SRX8994334	Nanog	ES cells	39021	642/2291	1657/93663	-324	-324	15.84
SRX5023743	Sox2	ES cells	33731	494/2291	1276/93663	-324	-324	15.8278
SRX6032063	Esrrb	ES cells	33221	556/2291	1437/93663	-324	-324	15.8183
SRX13791033	Epitope tags	ES cells	45195	569/2291	1475/93663	-324	-324	15.7711
SRX13791034	Epitope tags	ES cells	39926	503/2291	1306/93663	-324	-324	15.7459
SRX16038361	Esrrb	ES cells	32443	492/2291	1278/93663	-324	-324	15.739
SRX8844234	Olig2	EpiSC	70625	1237/2291	3217/93663	-324	-324	15.7203
SRX1141347	Nanog	ES cells	29701	488/2291	1271/93663	-324	-324	15.697
SRX1670199	Rad21	ES cells	35193	645/2291	1689/93663	-324	-324	15.6125
SRX6032053	Esrrb	ES cells	34091	540/2291	1416/93663	-324	-324	15.591
SRX6003873	Tbp	ES cells	83298	1498/2291	3930/93663	-324	-324	15.5834
SRX1670215	Rad21	ES cells	35058	627/2291	1652/93663	-324	-324	15.5167
SRX6032065	Esrrb	ES cells	27736	439/2291	1158/93663	-324	-324	15.4988
SRX6831867	Smc1a	ES cells	106829	1784/2291	4719/93663	-324	-324	15.4557
SRX19838670	Men1	ES cells	30784	469/2291	1246/93663	-324	-324	15.3886
SRX16038360	Esrrb	ES cells	58940	986/2291	2629/93663	-324	-324	15.3331
SRX8517931	Sox2	ES cells	29284	488/2291	1302/93663	-324	-324	15.3233
SRX9107990	Rad21	ES cells	70602	1126/2291	3008/93663	-324	-324	15.3039
SRX9345866	Tfcp2l1	ES cells	33929	528/2291	1413/93663	-324	-324	15.2769
SRX12260418	Ctcf	mESC derived erythroid cells	31738	508/2291	1361/93663	-324	-324	15.2598
SRX17066024	Ctcf	mESC derived erythroid cells	31738	508/2291	1361/93663	-324	-324	15.2598
SRX6879011	Nanog	ES cells	39544	630/2291	1692/93663	-324	-324	15.2224
SRX9295985	Epitope tags	ES cells	65742	1140/2291	3068/93663	-324	-324	15.1912
SRX6032064	Esrrb	ES cells	38763	632/2291	1720/93663	-324	-324	15.0221
SRX13439115	Ctcf	ES cells	28375	568/2291	1547/93663	-324	-324	15.0107
SRX9486383	Sox2	ES cells	144389	1909/2291	5257/93663	-324	-324	14.8461
SRX5023724	Nanog	ES cells	35947	509/2291	1404/93663	-324	-324	14.8216
SRX1670223	Rad21	ES cells	30728	588/2291	1624/93663	-324	-324	14.8025
SRX7622748	Rad21	ES cells	29169	566/2291	1568/93663	-324	-324	14.7575
SRX12204132	Ctcf	ES cells	39680	647/2291	1798/93663	-324	-324	14.7115
SRX2609731	Btaf1	ES cells	107513	1031/2291	2866/93663	-324	-324	14.707
SRX15888982	Epitope tags	ES cells	31807	468/2291	1310/93663	-324	-324	14.6055
SRX2894851	Btaf1	ES cells	107004	1039/2291	2913/93663	-324	-324	14.582
SRX10710581	Rnf2	ES cells	20530	505/2291	1419/93663	-324	-324	14.5496
SRX5023741	Sox2	ES cells	40932	604/2291	1700/93663	-324	-324	14.5255
SRX15888981	Epitope tags	ES cells	36995	550/2291	1551/93663	-324	-324	14.4975
SRX3581843	Tcf3	ES cells	37035	500/2291	1426/93663	-324	-324	14.3349
SRX16038363	Esrrb	ES cells	45259	658/2291	1881/93663	-324	-324	14.3015
SRX5436003	Stag2	ES cells	32438	554/2291	1590/93663	-324	-324	14.2448
SRX14601063	Rad21	ES cells	24822	457/2291	1337/93663	-324	-324	13.9742
SRX4054025	Neurog2	mESCs, differentiated	41609	551/2291	1640/93663	-324	-324	13.7357
SRX10134087	Ctcf	mESCs, differentiated	54378	860/2291	2565/93663	-324	-324	13.7074
SRX5023742	Sox2	ES cells	44994	603/2291	1814/93663	-324	-324	13.5901
SRX10437502	Ctcf	ES cells	58853	891/2291	2697/93663	-324	-324	13.5064
SRX4054030	Ebf2	mESCs, differentiated	64160	783/2291	2402/93663	-324	-324	13.327
ERX2021911	Ctcf	ES cells	54721	721/2291	2215/93663	-324	-324	13.3077
SRX085109	Smc1a	ES cells	42811	569/2291	1751/93663	-324	-324	13.2852
SRX16038362	Esrrb	ES cells	73398	1041/2291	3249/93663	-324	-324	13.0992
SRX16038364	Esrrb	ES cells	69788	974/2291	3048/93663	-324	-324	13.0643
SRX085110	Smc1a	ES cells	37438	498/2291	1569/93663	-324	-324	12.9763
SRX031215	Epitope tags	ES cells	39469	501/2291	1580/93663	-324	-324	12.9635
SRX1706970	Ebf2	mESCs, differentiated	80764	875/2291	2777/93663	-324	-324	12.8818
SRX4004790	Esrrb	ES cells	45465	685/2291	2182/93663	-324	-324	12.8345
SRX7622743	Stag2	ES cells	37418	543/2291	1741/93663	-324	-324	12.751
SRX6827272	Nanog	ES cells	74045	828/2291	2724/93663	-324	-324	12.427
SRX4054026	Neurog2	mESCs, differentiated	47239	544/2291	1798/93663	-324	-324	12.3695
SRX5292078	Ctcf	ES cells	62773	723/2291	2423/93663	-324	-324	12.1991
SRX5023707	Esrrb	ES cells	48934	593/2291	2009/93663	-324	-324	12.0675
SRX10437498	Ctcf	ES cells	97939	1210/2291	4110/93663	-324	-324	12.0361
SRX390111	GFP	ES cells	170785	1433/2291	4904/93663	-324	-324	11.9464
SRX1706969	Ebf2	mESCs, differentiated	90536	924/2291	3208/93663	-324	-324	11.7755
SRX4167137	Smc1a	ES cells	34968	489/2291	1713/93663	-324	-324	11.6706
ERX2021916	Rad21	ES cells	37408	487/2291	1714/93663	-324	-324	11.6161
SRX9896071	Zic3	mESCs, differentiated	59498	636/2291	2277/93663	-324	-324	11.4192
SRX7622746	Stag1	ES cells	42446	576/2291	2067/93663	-324	-324	11.3927
SRX10437496	Ctcf	ES cells	84751	1024/2291	3710/93663	-324	-324	11.2842
SRX2609733	Dr1	ES cells	110650	770/2291	2816/93663	-324	-324	11.179
SRX20248718	Rad21	ES cells	48106	602/2291	2203/93663	-324	-324	11.1718
SRX10437503	Ctcf	ES cells	99282	1159/2291	4248/93663	-324	-324	11.1543
SRX9641482	Rad21	ES cells	42358	505/2291	1862/93663	-324	-324	11.088
SRX7622740	Stag1	ES cells	41473	548/2291	2023/93663	-324	-324	11.0746
SRX5023708	Esrrb	ES cells	53441	608/2291	2260/93663	-324	-324	10.9986
SRX9326753	Smc3	ES cells	50771	597/2291	2220/93663	-324	-324	10.9942
SRX10437506	Ctcf	ES cells	64330	720/2291	2681/93663	-324	-324	10.9794
SRX13408981	Ctcf	Embryoid Bodies	55028	577/2291	2160/93663	-324	-324	10.9211
SRX9326758	Smc3	ES cells	44603	538/2291	2020/93663	-324	-324	10.8886
SRX20248712	Rad21	ES cells	51362	597/2291	2243/93663	-324	-324	10.8815
SRX13408980	Ctcf	Embryoid Bodies	54499	585/2291	2198/93663	-324	-324	10.8811
SRX3430136	Rad21	ES cells	48628	540/2291	2046/93663	-324	-324	10.7902
SRX10560015	Ctcf	ES cells	79961	840/2291	3195/93663	-324	-324	10.7486
SRX9326756	Smc3	ES cells	47842	519/2291	1984/93663	-324	-324	10.6947
SRX7622754	Rad21	ES cells	42477	515/2291	1971/93663	-324	-324	10.6823
SRX9418410	Ctcf	ES cells	45309	576/2291	2207/93663	-324	-324	10.67
SRX7622741	Stag1	ES cells	44830	540/2291	2132/93663	-324	-324	10.355
SRX10437497	Ctcf	ES cells	96719	993/2291	3937/93663	-324	-324	10.3116
SRX1035405	Spi1	mESC derived macrophages	77393	671/2291	2672/93663	-324	-324	10.2667
SRX390112	GFP	ES cells	207894	1358/2291	5518/93663	-324	-324	10.0615
[truncated: 5,414 more rows]

## Sheet: README
Tab name	Experiment type: TFs and Others; Cell type class: Pluripotent stem cell; Threshold for significance: 50
[truncated: 13 more rows]
